# Supplementary material for: Enantioselective formal [2 + 2 + 2] cycloaddition of 1,3,5-triazinanes to construct tetrahydropyrimidin-4-one derivatives
Source: Royal Society of Chemistry journal article supplement (doi:10.1039/d1cc06549a), 2021-12-09

## Enantioselective formal [2+2+2] cycloaddition of 1,3,5-triazinanes to construct tetrahydropyrimidin-4-one derivatives

Peiran Ruan, Qiong Tang, Zun Yang, Xiaohua Liu\* and Xiaoming Feng\*

**Abstract:** A chiral Lewis acid-catalyzed enantioselective formal [2+2+2] cycloaddition of 1,3,5-triazinanes with azlactones or  $\beta,\gamma$ -unsaturated pyrazole amides were developed to synthesize chiral tertiary/quaternary tetrahydropyrimidin-4-one derivatives with good yields and enantioselectivities. Two competitive reaction pathways were proposed based on experiments.

DOI: 10.1039/x0xx00000x

## Index

|                                                                                   |    |
|-----------------------------------------------------------------------------------|----|
| 1. General Information .....                                                      | 1  |
| 2. Substrates synthesis .....                                                     | 1  |
| 3. General procedure for the catalytic asymmetric cycloaddition .....             | 2  |
| 4. Scope limitation .....                                                         | 2  |
| 5. Experimental procedure for the scale-up reaction and further conversion .....  | 3  |
| 6. The nonlinear effect study .....                                               | 4  |
| 7. Control experiments and other catalysts screening .....                        | 5  |
| 8. Optimazition reaction condition .....                                          | 8  |
| 9. Possible reaction pathways for $\beta,\gamma$ -unsaturated pyrazole amide..... | 13 |
| 10. Determination of absolute configurations of the compounds .....               | 14 |
| 11. Analysis results of 2D NMR spectra of the product 3ac .....                   | 16 |
| 12. Characterization of products .....                                            | 19 |
| 13. References .....                                                              | 60 |
| 14. Copies of NMR spectra for products.....                                       | 61 |

## 1. General Information

NMR characterization data were collected on Bruker ASCENDTM operating at 400 MHz for  $^1\text{H}$  NMR, 101 MHz for  $^{13}\text{C}$  NMR (with complete proton decoupling), and 376 MHz for  $^{19}\text{F}$  NMR (with complete proton decoupling).  $^1\text{H}$  NMR and  $^{13}\text{C}$  NMR: chemical shifts  $\delta$  were recorded in ppm relative to tetramethylsilane and internally referenced to the residual solvent signal (for  $^1\text{H}$  NMR:  $\text{CDCl}_3 = 7.26$  ppm,  $\text{DMSO}-d_6 = 2.50$  ppm; for  $^{13}\text{C}$  NMR:  $\text{CDCl}_3 = 77.1$  ppm,  $\text{DMSO}-d_6 = 39.6$  ppm). Data were reported as follows: chemical shift, multiplicity (s = singlet, d = doublet, t = triplet, q = quartet, dd = doublet of doublets, td = triplet of doublets, dt = doublet of triplets, ddd = doublet of doublet of doublets, m = multiplet), coupling constants (Hz), integration. High performance liquid chromatography (HPLC) was performed on Alliance e2695 using Daicel Chiralcel IA, IE, IH, ADH, ODH at 23 °C with UV detector at 254 nm, supercritical fluid chromatography (SFC) was performed on Acquity UPC<sup>2</sup> using Daicel Chiralcel OX-3, IB-3 at 25 °C with UV detector at 254 nm, enantiomeric excesses (ee) and enantiomeric ratio (er) were determined in comparison with the authentic racemates. High resolution mass spectra (HRMS) were performed on Thermo Q-Exactive Focus (FTMS+c ESI) and data were reported as (m/z). Infrared spectra (IR) were recorded on Bruker Tensor II spectrometer with Plantium ATR accessory and the peaks are reported as absorption maxima ( $\nu$ ,  $\text{cm}^{-1}$ ). Optical rotations were measured on Rudolph Research Analytic Automatic Polarimeter, and reported as follows:  $[\alpha]_D^{25}$  (c: g/100 mL, solvent). Melting point ranges were determined on OptiMelt. X-ray crystallographic data were collected by a Bruker D8 Venture Photon II.

The experiments requiring chiral  $N,N'$ -dioxide ligands<sup>1</sup> and azlactone<sup>2</sup> were synthesized according to known procedures and purified by recrystallization prior to use. All of the starting materials including the metal salts were purchased from TCI, Aladdin, Adamas, Acros, Aldrich and other companies, and used without further purification. The 3/4/5Å MS was purchased from Acros, and oven-dried by the muffle furnace for 4 h prior to use. All the solvents including toluene, tetrahydrofuran, diethyl ether, dichloromethane, chloroform, 1,2-dichloroethane and so on were pre-dried over appropriate desiccants, and distilled prior to use. Reactions were monitored using thin-layer chromatography (TLC) on GF254 silica gel. Visualization of the developed plates was performed under UV light (254 nm) or using iodine, cobalt thiocyanate or  $\text{KMnO}_4$ . The products were purified by flash column chromatography with silicycle 300-400 mesh silica gel.

## 2. Substrates synthesis

## 2.1 General procedure for the synthesis of $\beta,\gamma$ -unsaturated pyrazole amide compounds<sup>3</sup>

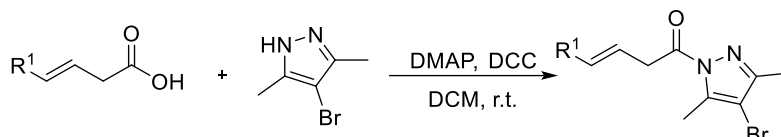

A solution of  $\beta,\gamma$ -unsaturated carboxylic acid (4.0 mmol) and the substituted pyrazole (4.2 mmol, 1.05 equiv) in  $\text{CH}_2\text{Cl}_2$  (30 mL) at 0 °C was added DCC (1.2 equiv, 4.8 mmol in 10 mL of  $\text{CH}_2\text{Cl}_2$ ) and 4-DMAP (4.0 mmol, 1.0 equiv) successively. The resulting mixture was stirred at 0 °C for 30 minutes, then gradually warmed to room temperature and further stirred at room temperature for 24 hours. Water (75 mL) was added to the crude product which was then extracted with  $\text{CH}_2\text{Cl}_2$  (80 mL  $\times$  2). The combined organic phase was washed with water, brine, dried over  $\text{Na}_2\text{SO}_4$ , filtered, concentrated under reduced pressure and purified by column chromatography to afford the desired product.

## 2.2 General procedure for the synthesis of 1,3,5-triazinane compounds<sup>4</sup>

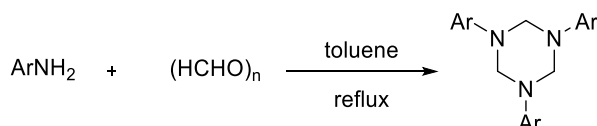

In a 100 mL round-bottomed flask equipped with a Dean-Stark apparatus, a mixture of aniline (30 mmol), paraformaldehyde (30 mmol), and toluene (50 mL) was heated with refluxing for 2 hours. Then the solvent was concentrated under reduced pressure at 50 °C, a precipitate came out from the mixture. The precipitate was collected by filtration, washed with *n*-hexane several times, and dried to obtain 1,3,5-triazinane.

## 3. General procedure for the catalytic asymmetric cycloaddition

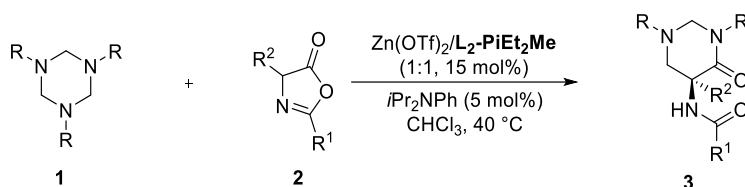

The reactions were carried out with  $\text{Zn}(\text{OTf})_2/\text{L}_2\text{-PiEt}_2\text{Me}$  (1:1, 15 mol%) in THF (0.3 mL) under  $\text{N}_2$  at 35 °C for 0.5 h. After removing the solvent in vacuo, 1,3,5-triazinane **1** (0.1 mmol), azlactone **2** (0.1 mmol),  $i\text{Pr}_2\text{NPh}$  (5 mol%) and solvent (1 mL) were added successively under  $\text{N}_2$  and kept stirring at 40 °C for 38-72 h. The reaction mixture was subjected to column chromatography on silica gel and eluted with petroleum ether–ethyl acetate (v/v, 5:1) to afford the corresponding product **3**. The racemic product was prepared through the same process without catalyst or  $i\text{Pr}_2\text{NPh}$ .

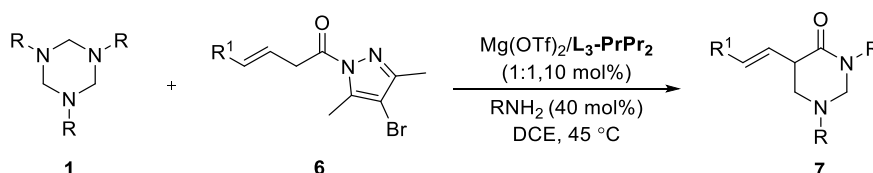

The reaction was conducted with  $\text{Mg}(\text{OTf})_2$  (0.01 mmol),  $\text{L}_3\text{-PrPr}_2$  (0.01 mmol) and pyrazole amide **6** (0.10 mmol) in 1.0 mL of DCE. The mixture was stirred at 35 °C under  $\text{N}_2$  for 30 min. 1,3,5-Triazinane **1** (0.15 mmol) and  $\text{RNH}_2$  were added, and the resulting mixture was stirred at 45 °C for 120 h. The reaction mixture was subjected to column chromatography on silica gel and eluted with petroleum ether–ethyl acetate (v/v, 4:1) to afford the corresponding product **7**. The racemic product was prepared using  $\text{Mg}(\text{OTf})_2/(\pm)\text{-L}_3\text{-PrPr}_2$  complex as catalyst.

## 4. Scope limitation

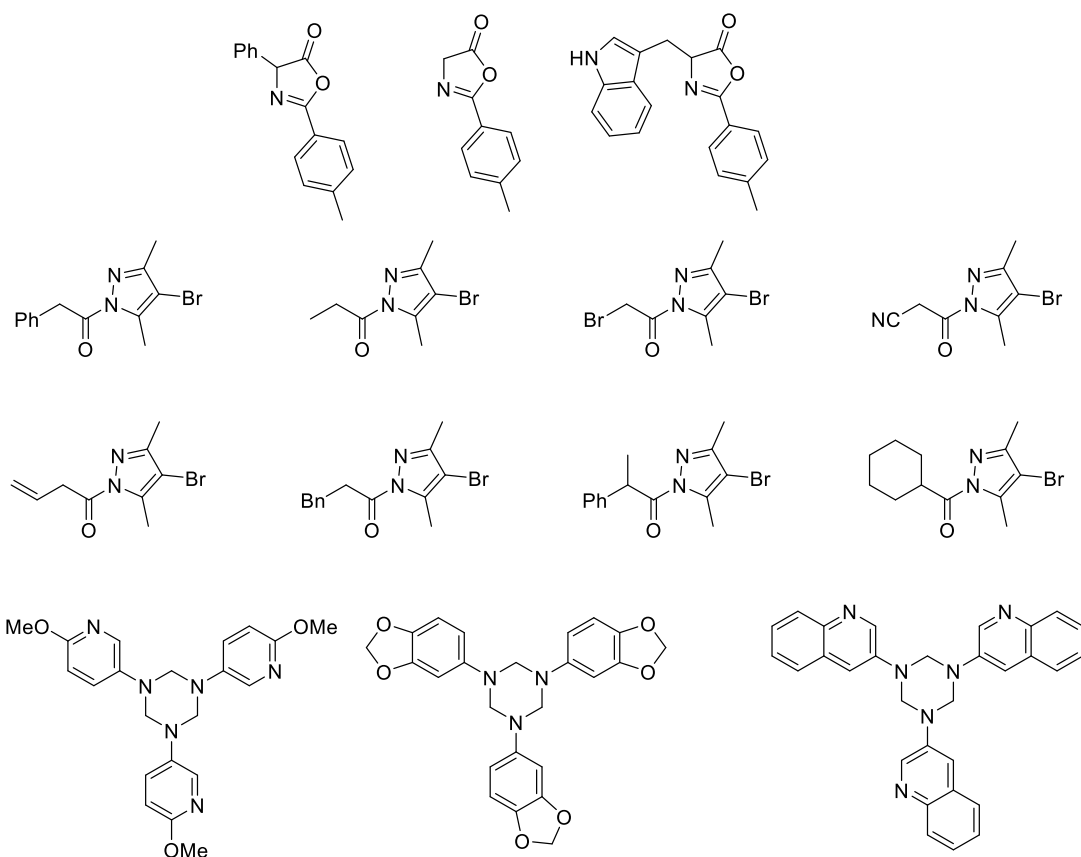

The substrates above had no reactivities in the catalytic system.

## 5. Experimental procedure for the scale-up reaction and further conversion

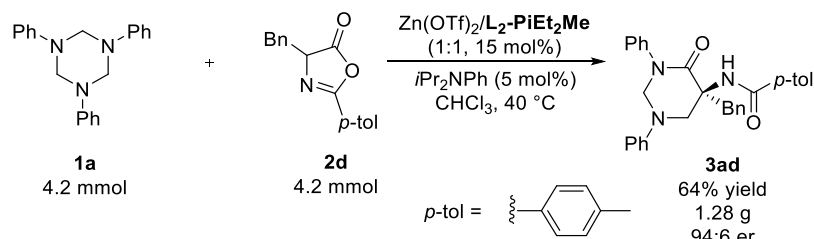

A dry 50 mL round-bottom flask was charged with  $\text{Zn(OTf)}_2$  (15 mol%, 226.8 mg),  $\text{L}_2\text{-PiEt}_2\text{Me}$  (15 mol%, 382.2 mg). Then, THF (12.0 mL) was added and the mixture was stirred at 35 °C under  $\text{N}_2$  for 10 h. After removing the solvent in vacuo,  $N$ -phenyl 1,3,5-triazinane  $\text{1a}$  (4.2 mmol, 1.32 g), azlactone  $\text{2d}$  (4.2 mmol, 1.05 g),  $i\text{Pr}_2\text{NPh}$  (5 mol%, 42  $\mu\text{L}$ ) and  $\text{CHCl}_3$  (42 mL) were added successively under  $\text{N}_2$  and kept stirring at 40°C for 60 h. The solvent was removed in vacuo and the residue was subjected to column chromatography on silica gel and eluted with petroleum ether–ethyl acetate (v/v, 5:1) to afford the corresponding product  $\text{3ad}$  (1.28 g, 64% yield, 94:6 er).

**Self-disproportionation of enantiomers (SDE) was observed in the flash chromatography separation, but it did not attain the significant level.**

The products of the first four tubes, the next four tubes, and all were obtained in 93:7 er, 95:5 er, 94:6 er, separately.

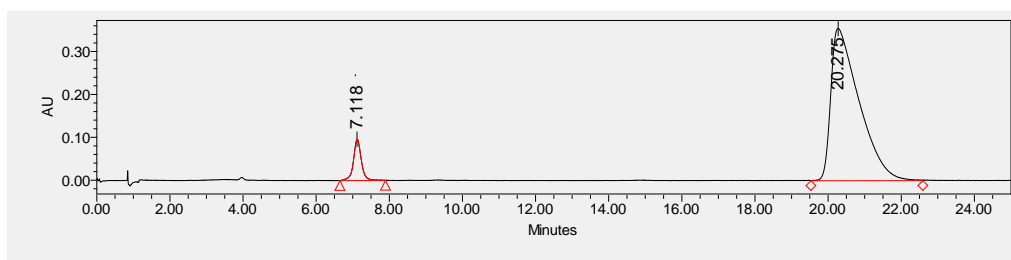

|   | Retention Time | Area     | % Area |
|---|----------------|----------|--------|
| 1 | 7.118          | 1439694  | 7.03   |
| 2 | 20.275         | 19043897 | 92.97  |

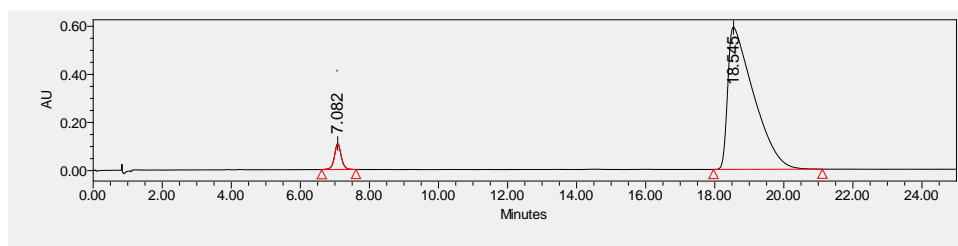

|   | Retention Time | Area     | % Area |
|---|----------------|----------|--------|
| 1 | 7.082          | 1495942  | 4.64   |
| 2 | 18.545         | 30759435 | 95.36  |

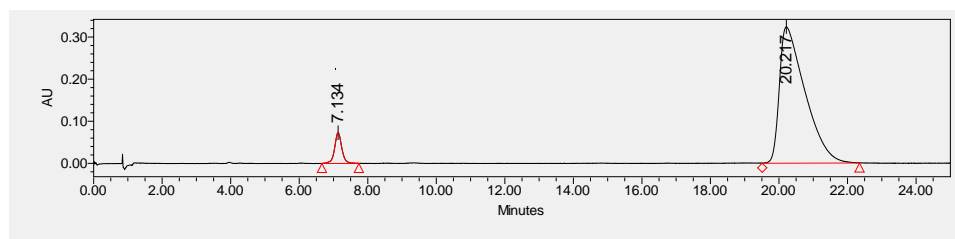

|   | Retention Time | Area     | % Area |
|---|----------------|----------|--------|
| 1 | 7.134          | 1068334  | 5.99   |
| 2 | 20.217         | 16781518 | 94.01  |

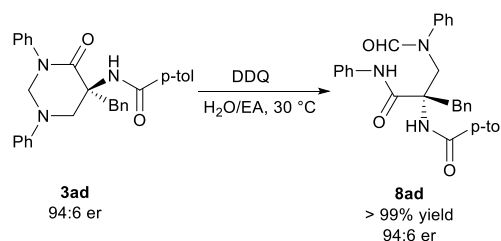

**3ad** (0.1 mmol, 96:6 er) was dissolved in ethyl acetate (1 mL), and then H<sub>2</sub>O (0.1 mmol, 1.8 μL), DDQ (0.2 mmol, 45.4 mg) were added successively. After stirring at 30 °C for 3 h, the reaction mixture was subjected to column chromatography on silica gel and eluted with petroleum ether–ethyl acetate (v/v, 3:1) to afford the corresponding product **8ad** with maintained optical activity.

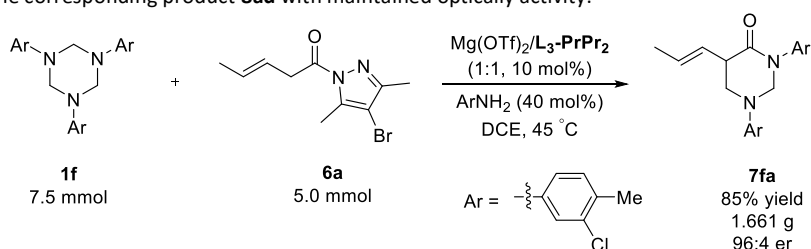

A dry reaction 50 mL round-bottom flask was charged with Mg(OTf)<sub>2</sub> (10 mol%, 161.0 mg), L<sub>3</sub>-PrPr<sub>2</sub> (10 mol%, 310.5 mg) and the substrate **6a** (5.0 mmol, 1.285 g). Then, DCE (50.0 mL) was added and the mixture was stirred at 35 °C under N<sub>2</sub> for 5 h. Subsequently, **1f** (1.5 equiv., 3.700 g) and ArNH<sub>2</sub> was added and the reaction mixture was stirred at 45 °C for 120 h. The solvent was removed in vacuo and the residue was subjected to column chromatography on silica gel and eluted with petroleum ether–ethyl acetate (v/v, 6:1) to afford the corresponding product **7fa** (1.701 g, 85% yield, 96:4 er).

## 6. The nonlinear effect study

**Table S1** The relationship between ee of the ligand and ee of the product **3ad**

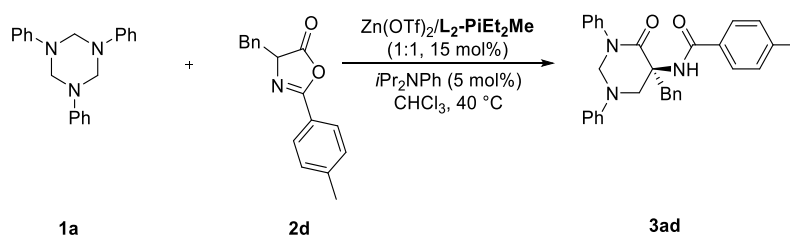

| entry <sup>[a]</sup> | ee of L <sub>2</sub> -PIEt <sub>2</sub> Me (%) | yield (%) <sup>[b]</sup> | ee of 3ad (%) <sup>[c]</sup> |
|----------------------|------------------------------------------------|--------------------------|------------------------------|
| 1                    | 0                                              | 79                       | 0                            |
| 2                    | 20                                             | 67                       | 18                           |
| 3                    | 40                                             | 75                       | 30                           |
| 4                    | 60                                             | 73                       | 46                           |
| 5                    | 80                                             | 74                       | 65                           |
| 6                    | 100                                            | 63                       | 90                           |

[a] All reactions were carried out with Zn(OTf)<sub>2</sub>/L<sub>2</sub>-PIEt<sub>2</sub>Me (1:1, 15 mol%), **1a** (0.1 mmol), **2d** (0.1 mmol), *i*Pr<sub>2</sub>NPh (5 mol%) in DCE (1.0 mL) at 40 °C for 38 h. [b] Yield of isolated product. [c] Determined by SFC analysis on a chiral stationary phase.

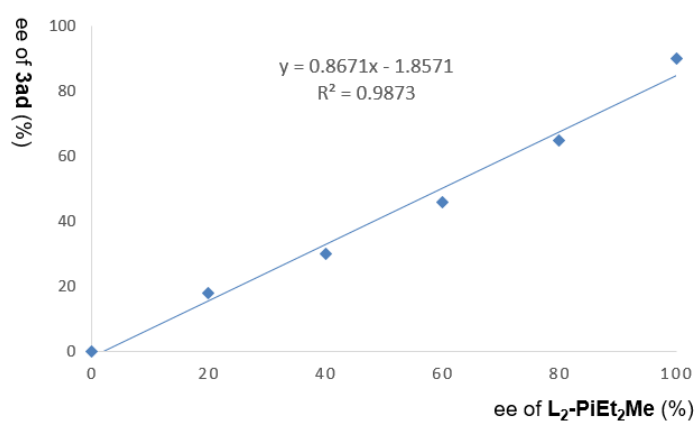

Figure S1 Linear relationship between ee of the ligand and ee of the product **3ad**.

Table S2. The relationship between ee of the ligand and ee of the product **7aa**

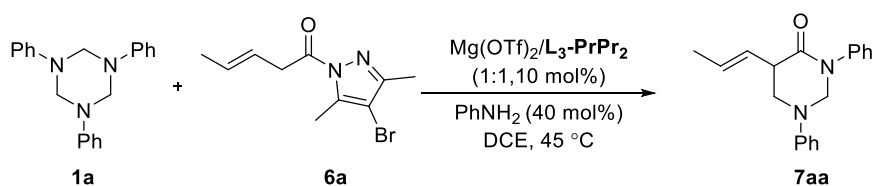

| entry <sup>[a]</sup> | ee of L <sub>3</sub> -PrPr <sub>2</sub> (%) | yield (%) <sup>[b]</sup> | ee of 7aa (%) <sup>[c]</sup> |
|----------------------|---------------------------------------------|--------------------------|------------------------------|
| 1                    | 0                                           | 89                       | 0                            |
| 2                    | 20                                          | 89                       | 21                           |
| 3                    | 40                                          | 89                       | 42                           |
| 4                    | 60                                          | 89                       | 55                           |
| 5                    | 80                                          | 90                       | 76                           |
| 6                    | 100                                         | 90                       | 92                           |

[a] All reactions were carried out with Mg(OTf)<sub>2</sub>/L<sub>3</sub>-PrPr<sub>2</sub> (1:1, 10 mol%), **6a** (0.10 mmol), **1a** (0.15 mmol), PhNH<sub>2</sub> (20 mol%) in DCE (1.0 mL) at 45 °C for 120 h. [b] Yield of isolated product. [c] Determined by HPLC analysis on a chiral stationary phase.

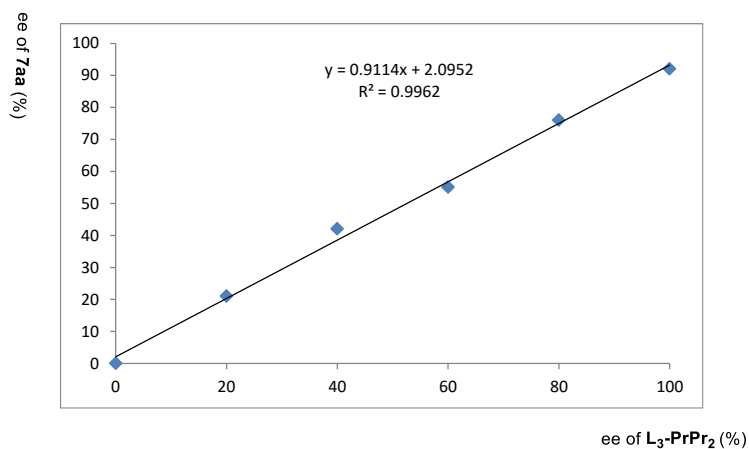

Figure S2 Linear relationship between ee of the ligand and ee of the product **7aa**.

## 7. Control experiments and other catalysts screening

**Table S3** Control experiments and other catalysts screening

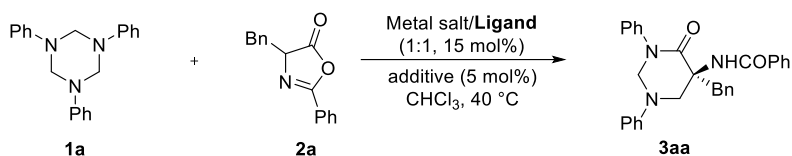

| entry <sup>[a]</sup> | ligand                                  | metal salt           | additive                     | yield (%) <sup>[b]</sup> | er <sup>[c]</sup> |
|----------------------|-----------------------------------------|----------------------|------------------------------|--------------------------|-------------------|
| 1                    | --                                      | Zn(OTf) <sub>2</sub> | <i>i</i> Pr <sub>2</sub> NPh | 18                       | --                |
| 2                    | <b>L<sub>2</sub>-PiEt<sub>2</sub>Me</b> | --                   | <i>i</i> Pr <sub>2</sub> NPh | 38                       | 51:49             |
| 3                    | --                                      | --                   | <i>i</i> Pr <sub>2</sub> NPh | 50                       | --                |
| 4                    | <b>L<sub>2</sub>-PiEt<sub>2</sub>Me</b> | Zn(OTf) <sub>2</sub> | --                           | 62                       | 95:5              |
| 5                    | --                                      | --                   | --                           | 73                       | --                |
| 6                    | <b>L<sub>2</sub>-PiEt<sub>2</sub>Me</b> | Zn(OTf) <sub>2</sub> | <i>i</i> Pr <sub>2</sub> NPh | 71                       | 95:5              |
| 7                    |                                         | --                   | <i>i</i> Pr <sub>2</sub> NPh | 72                       | 50:50             |
| 8                    |                                         | Zn(OTf) <sub>2</sub> | <i>i</i> Pr <sub>2</sub> NPh | 66                       | 50:50             |
| 9                    |                                         | Zn(OTf) <sub>2</sub> | <i>i</i> Pr <sub>2</sub> NPh | 57                       | 54.5:45.5         |

[a] All reactions were carried out with **ligand** (0 or 15 mol%), metal salts (0 or 15 mol%), **1a** (0.1 mmol), **2a** (0.1 mmol), *i*Pr<sub>2</sub>NPh (0 or 5 mol%) in CHCl<sub>3</sub> (1.0 mL) at 40 °C for 38 h. [b] Isolated yield. [c] Determined by chiral SFC analysis.

**Scheme S1** Control experiments about byproducts

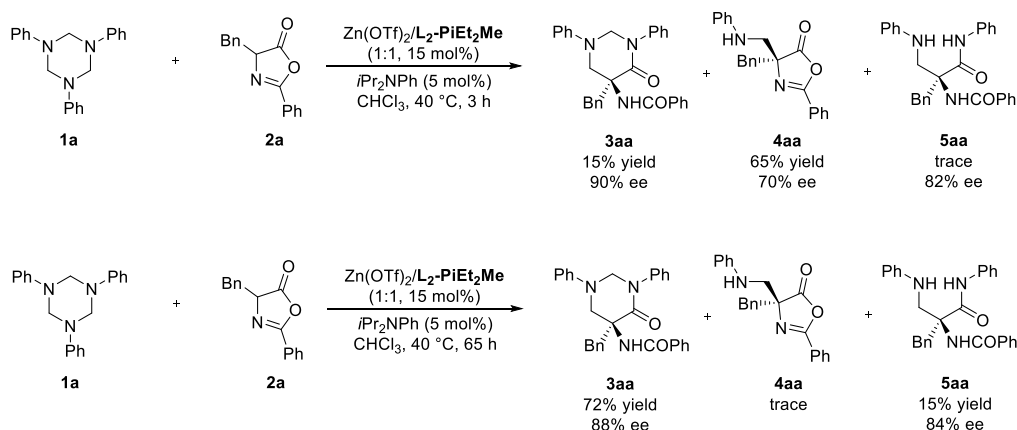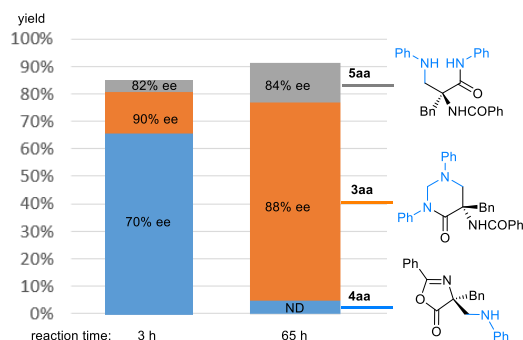

Under standard conditions, the reaction between **1a** and **2a** was analyzed at different reaction time.

It is testified by TLC analysis that the byproduct **4aa** is an intermediate to partly form **3aa**, leading to slightly lower yield of **3aa**. The **5aa** is formal hydrolysate of **3aa** via losing a formaldehyde. Moreover, the formal Mannich product **4aa** has distinctly lower ee than the corresponding **3aa** (70% vs. 90% ee at 3 h).

SFC analysis for **4aa**: dissolved **4aa** in MeOH for SFC; SFC (Daicel chiralcel OX-3, CO<sub>2</sub>/EtOH = 80/20, flow rate = 1.5 mL/min, λ = 254 nm) retention time: t<sub>minor</sub> = 4.53 min, t<sub>major</sub> = 5.21 min. Reaction time = 3 h, ee= 70%.

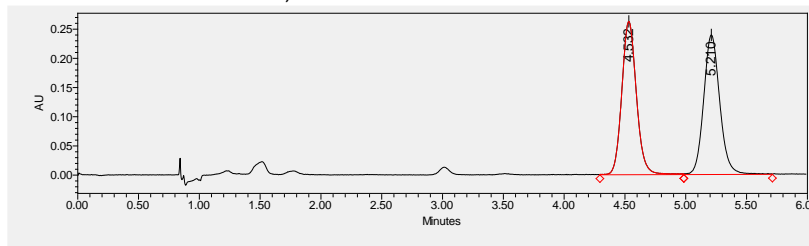

|   | Retention Time | Area    | % Area |
|---|----------------|---------|--------|
| 1 | 4.532          | 2191426 | 49.90  |
| 2 | 5.210          | 2200251 | 50.10  |

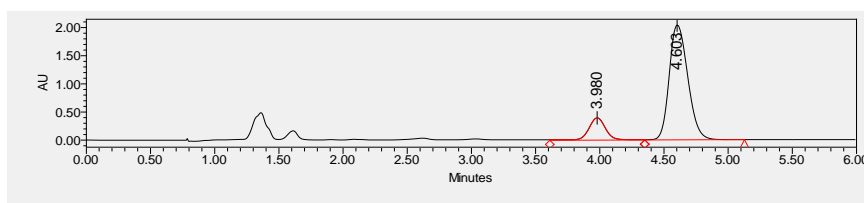

|   | Retention Time | Area     | % Area |
|---|----------------|----------|--------|
| 1 | 3.980          | 3644036  | 15.07  |
| 2 | 4.603          | 20543068 | 84.93  |

SFC analysis for **5aa**: dissolved **5aa** in MeOH for SFC; SFC (Daicel chiralcel OX-3, CO<sub>2</sub>/EtOH = 80/20, flow rate = 1.5 mL/min, λ = 254 nm) retention time: t<sub>minor</sub> = 5.90 min, t<sub>major</sub> = 7.85 min. Reaction time = 3 h, ee= 82%; reaction time = 65 h ee= 84%.

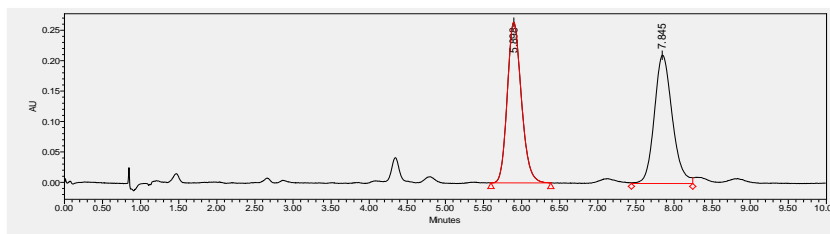

|   | Retention Time | Area    | % Area |
|---|----------------|---------|--------|
| 1 | 5.898          | 3391136 | 49.56  |
| 2 | 7.845          | 3450978 | 50.44  |

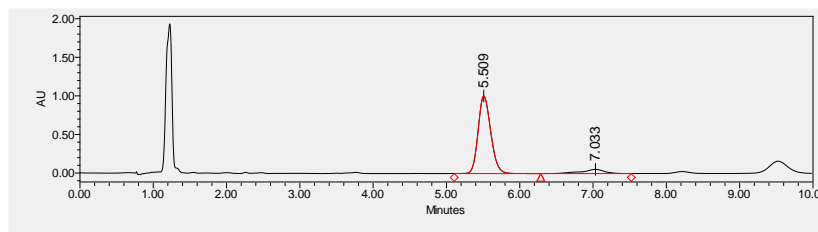

|   | Retention Time | Area     | % Area |
|---|----------------|----------|--------|
| 1 | 5.509          | 12020200 | 91.06  |
| 2 | 7.033          | 1180250  | 8.94   |



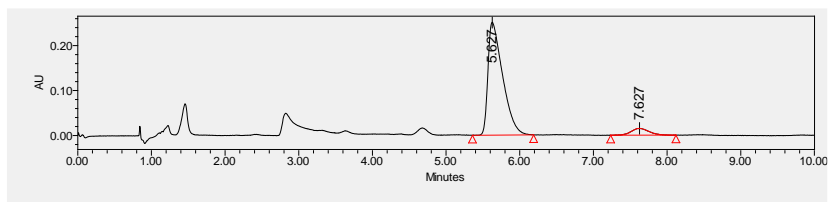

|   | Retention Time | Area    | % Area |
|---|----------------|---------|--------|
| 1 | 5.627          | 3464354 | 93.20  |
| 2 | 7.627          | 252639  | 6.80   |

**Scheme S2** cross-over experiment

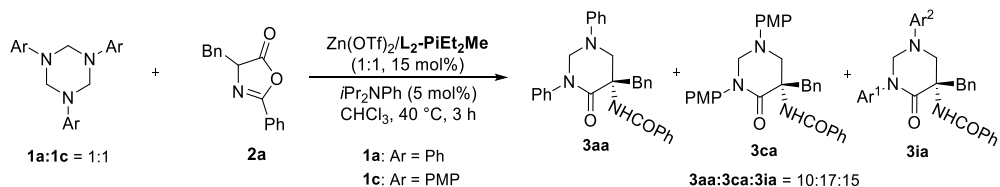

A cross-over experiment was performed by subjecting *N*-Ph triazinane **1a** and *N*-PMP triazinane **1c** with azlactone **2a** to the standard reaction conditions. Not only were the corresponding products **3aa** and **3ca** detected, but also so was the *N*-substitution cross-over product **3ia**, with these three products observed in a 10 : 17 : 15 ratio after 65 hours.

## 8. Optimazition reaction condition

### Optimazition for the reaction with azlactone

**Table S4** Optimization of metal salts

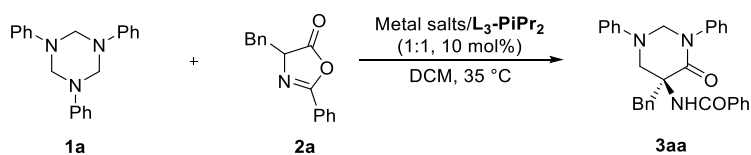

| entry <sup>[a]</sup> | metal salts          | yield (%) <sup>[b]</sup> | er (%) <sup>[c]</sup> |
|----------------------|----------------------|--------------------------|-----------------------|
| 1                    | Sc(OTf) <sub>3</sub> | 74                       | 70:30                 |
| 2                    | Y(OTf) <sub>3</sub>  | 65                       | 71:29                 |
| 3                    | Fe(OTf) <sub>3</sub> | 31                       | 57:43                 |
| 4                    | In(OTf) <sub>3</sub> | 67                       | 64:36                 |
| 5                    | Yb(OTf) <sub>3</sub> | 69                       | 72:28                 |
| 6                    | Ni(OTf) <sub>2</sub> | 72                       | 53:47                 |
| 7                    | Mg(OTf) <sub>2</sub> | 72                       | 54:46                 |
| 8                    | Zn(OTf) <sub>2</sub> | 84                       | 71:29                 |

[a] Unless otherwise noted, all reactions were carried out with metal salts/ $L_3-PiPr_2$  (1:1, 10 mol%), **1a** (0.1 mmol), **2a** (0.1 mmol), in DCM (1.0 mL) at 35 °C for 24 h. [b] Isolated yield. [c] Determined by chiral SFC analysis.

**Table S5** Optimization of the ligands

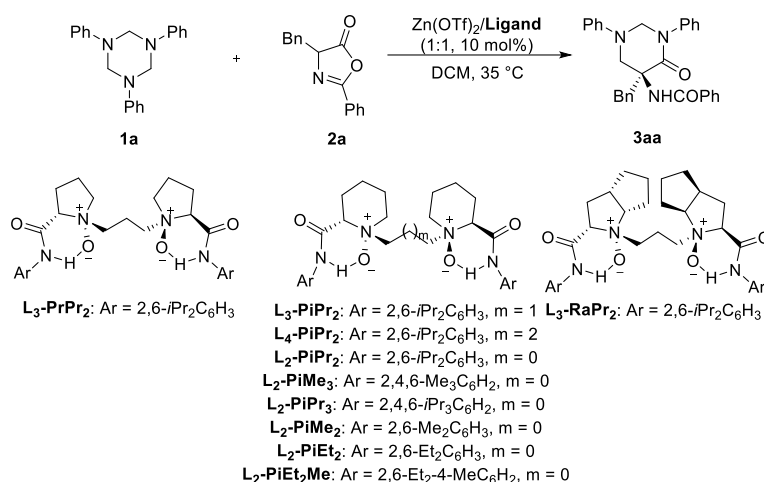

| entry <sup>[a]</sup> | ligand                                | yield (%) <sup>[b]</sup> | er (%) <sup>[c]</sup> |
|----------------------|---------------------------------------|--------------------------|-----------------------|
| 1                    | <b>L<sub>3</sub>-PrPr<sub>2</sub></b> | 78                       | 58:42                 |
| 2                    | <b>L<sub>3</sub>-RaPr<sub>2</sub></b> | 85                       | 51:49                 |
| 3                    | <b>L<sub>3</sub>-PiPr<sub>2</sub></b> | 84                       | 71:29                 |
| 4                    | <b>L<sub>4</sub>-PiPr<sub>2</sub></b> | 53                       | 60:40                 |
| 5                    | <b>L<sub>2</sub>-PiPr<sub>2</sub></b> | 54                       | 83:17                 |
| 6                    | <b>L<sub>2</sub>-PiEt<sub>2</sub></b> | 69                       | 88:12                 |
| 7                    | <b>L<sub>2</sub>-PiPr<sub>3</sub></b> | 57                       | 79:21                 |
| 8                    | <b>L<sub>2</sub>-PiMe<sub>3</sub></b> | 64                       | 89:11                 |

[a] Unless otherwise noted, all reactions were carried out with Zn(OTf)<sub>2</sub>/ligand (1:1, 10 mol%), **1a** (0.1 mmol), **2a** (0.1 mmol), in DCM (1.0 mL) at 35 °C for 24 h. [b] Isolated yield. [c] Determined by chiral SFC analysis.

**Table S6** Optimization of solvents

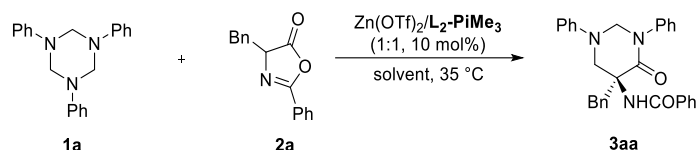

| entry <sup>[a]</sup> | solvent           | yield (%) <sup>[b]</sup> | er (%) <sup>[c]</sup> |
|----------------------|-------------------|--------------------------|-----------------------|
| 1                    | DCM               | 64                       | 89:11                 |
| 2 <sup>[d]</sup>     | THF               | 43                       | 59:41                 |
| 3                    | PhMe              | 69                       | 59:41                 |
| 4                    | Et <sub>2</sub> O | 68                       | 69.5:30.5             |
| 5 <sup>[d]</sup>     | CHCl <sub>3</sub> | 65                       | 80.5:19.5             |
| 6 <sup>[d]</sup>     | DCE               | 60                       | 88:12                 |

[a] Unless otherwise noted, all reactions were carried out with Zn(OTf)<sub>2</sub>/L<sub>2</sub>-PiMe<sub>3</sub> (1:1, 10 mol%), **1a** (0.1 mmol), **2a** (0.1 mmol), in solvent (1.0 mL) at 35 °C for 24 h. [b] Isolated yield. [c] Determined by chiral SFC analysis. [d] The reaction time was 34-38 h.

**Table S7** Optimization of temperature

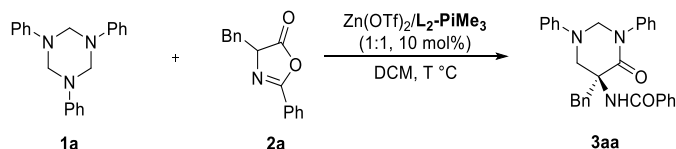

| entry <sup>[a]</sup> | T (°C) | yield (%) <sup>[b]</sup> | er (%) <sup>[c]</sup> |
|----------------------|--------|--------------------------|-----------------------|
| 1 <sup>[d]</sup>     | 35     | 64                       | 88.5:11.5             |
| 2                    | 30     | 59                       | 91.5:8.5              |
| 3                    | 20     | 52                       | 91:9                  |
| 4                    | 10     | 51                       | 88.5:11.5             |
| 5 <sup>[e]</sup>     | 30     | 57                       | 92.5:7.5              |

[a] Unless otherwise noted, all reactions were carried out with Zn(OTf)<sub>2</sub>/L<sub>2</sub>-PiMe<sub>3</sub> (1:1, 10 mol%), **1a** (0.1 mmol), **2a** (0.1 mmol), in DCM (1.0 mL) at T °C for 38 h. [b] Isolated yield. [c] Determined by chiral SFC analysis. [d] The reaction time was 24 h. [e] 15 mol% catalyst loading.

**Table S8:** Optimization of additive

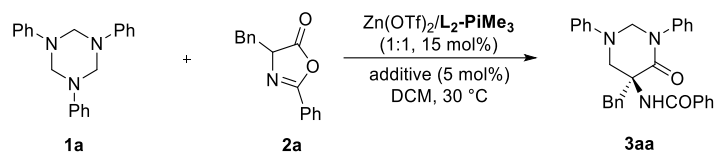

| entry <sup>[a]</sup> | additive                       | yield (%) <sup>[b]</sup> | er (%) <sup>[c]</sup> |
|----------------------|--------------------------------|--------------------------|-----------------------|
| 1                    | Et <sub>3</sub> N              | 58                       | 94.5:5.5              |
| 2                    | Ph <sub>3</sub> N              | 60                       | 91:9                  |
| 3                    | <i>i</i> Bu <sub>3</sub> N     | 63                       | 93.5:6.5              |
| 4                    | <i>i</i> Pr <sub>2</sub> EtN   | 57                       | 93:7                  |
| 5                    | <i>i</i> Pr <sub>2</sub> NH    | 57                       | 93:7                  |
| 6                    | <i>i</i> Pr <sub>2</sub> NPh   | 67                       | 94.5:5.5              |
| 7 <sup>[d]</sup>     | Et <sub>3</sub> N              | 62                       | 93.5:6.5              |
| 8 <sup>[d]</sup>     | K <sub>2</sub> CO <sub>3</sub> | 34                       | 93.5:6.5              |
| 9 <sup>[d]</sup>     | <i>t</i> BuOK                  | 54                       | 91.5:8.5              |
| 10 <sup>[e]</sup>    | <i>i</i> Pr <sub>2</sub> NPh   | 48                       | 94:6                  |
| 11 <sup>[f]</sup>    | <i>i</i> Pr <sub>2</sub> NPh   | 60                       | 94:6                  |

[a] Unless otherwise noted, all reactions were carried out with Zn(OTf)<sub>2</sub>/L<sub>2</sub>-PiMe<sub>3</sub> (1:1, 15 mol%), **1a** (0.1 mmol), **2a** (0.1 mmol) and additive (5 mol%) in DCM (1.0 mL) at 30 °C for 38 h. [b] Isolated yield. [c] Determined by chiral SFC analysis. [d] DCE was used instead of DCM. [e] 10 mol% additive loading. [f] 2.5 mol% additive loading.

**Table S9** Reoptimization of ligands

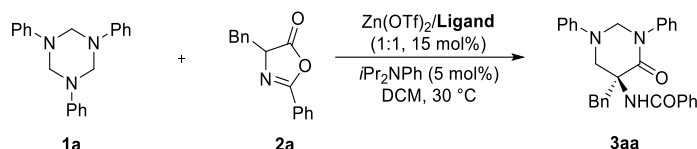

| entry <sup>[a]</sup> | Ligand                               | yield (%) <sup>[b]</sup> | er (%) <sup>[c]</sup> |
|----------------------|--------------------------------------|--------------------------|-----------------------|
| 1                    | L <sub>2</sub> -PiMe <sub>3</sub>    | 67                       | 94.5:5.5              |
| 2                    | L <sub>2</sub> -PiMe <sub>2</sub>    | 50                       | 94:6                  |
| 3                    | L <sub>2</sub> -PiEt <sub>2</sub>    | 60                       | 94:6                  |
| 4 <sup>[d]</sup>     | L <sub>2</sub> -PiEt <sub>2</sub> Me | 66                       | 94:6                  |
| 5 <sup>[d][e]</sup>  | L <sub>2</sub> -PiEt <sub>2</sub> Me | 63                       | 94:6                  |
| 6 <sup>[d][f]</sup>  | L <sub>2</sub> -PiEt <sub>2</sub> Me | 57                       | 94:6                  |

[a] Unless otherwise noted, all reactions were carried out with Zn(OTf)<sub>2</sub>/Ligand (1:1, 15 mol%), **1a** (0.1 mmol), **2a** (0.1 mmol) and *i*Pr<sub>2</sub>NPh (5 mol%) in DCM (1.0 mL) at 30 °C for 38 h. [b] Isolated yield. [c] Determined by chiral SFC analysis. [d] The ligand involved can be purified more efficiently by recrystallization. [e] 12.5 mol% catalyst loading. [f] 10 mol% catalyst loading.

**Table S10** Optimization of substrates ratio and concentration

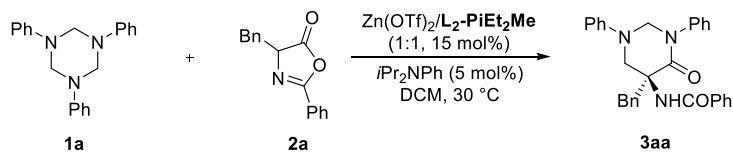

| entry <sup>[a]</sup> | <b>1a</b> (X mmol) | <b>2a</b> (Y mmol) | yield (%) <sup>[b]</sup> | er (%) <sup>[c]</sup> |
|----------------------|--------------------|--------------------|--------------------------|-----------------------|
| 1                    | 0.16               | 0.10               | 66                       | 93.5:6.5              |
| 2                    | 0.13               | 0.10               | 71                       | 93.5:6.5              |
| 3                    | 0.10               | 0.10               | 66                       | 94:6                  |
| 4                    | 0.07               | 0.10               | 65                       | 94:6                  |
| 5                    | 0.07               | 0.15               | 40                       | 95:5                  |

[a] Unless otherwise noted, all reactions were carried out with Zn(OTf)<sub>2</sub>/L<sub>2</sub>-PiEt<sub>2</sub>Me (1:1, 15 mol%), **1a** (X mmol), **2a** (Y mmol) and *i*Pr<sub>2</sub>NPh (5 mol%) in DCM (1.0 mL) at 30 °C for 38 h. [b] Isolated yield. [c] Determined by chiral SFC analysis.

**Table S11** Optimization of solvent and temperature

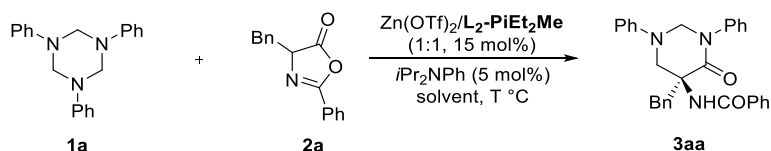

| entry <sup>[a]</sup> | solvent | T (°C) | yield (%) <sup>[b]</sup> | er (%) <sup>[c]</sup> |
|----------------------|---------|--------|--------------------------|-----------------------|
|----------------------|---------|--------|--------------------------|-----------------------|

|   |                   |    |    |          |
|---|-------------------|----|----|----------|
| 1 | DCM               | 30 | 66 | 94:6     |
| 2 | DCE               | 30 | 64 | 93.5:6.5 |
| 3 | CHCl <sub>3</sub> | 30 | 74 | 94.5:5.5 |
| 4 | CHCl <sub>3</sub> | 40 | 71 | 95:5     |
| 5 | CHCl <sub>3</sub> | 20 | 60 | 93:7     |

[a] Unless otherwise noted, all reactions were carried out with Zn(OTf)<sub>2</sub>/L<sub>2</sub>-PiEt<sub>2</sub>Me (1:1, 15 mol%), **1a** (0.1 mmol), **2a** (0.1 mmol) and *i*Pr<sub>2</sub>NPh (5 mol%) in solvent (1.0 mL) at T °C for 38 h. [b] Isolated yield. [c] Determined by chiral SFC analysis.

### Optimization for the reaction with β,γ-unsaturated pyrazole amide

**Table S12** Metal salts effect

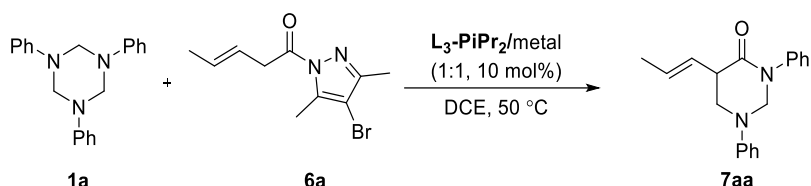

| entry <sup>[a]</sup> | metal salt           | yield (%) <sup>[b]</sup> | er (%) <sup>[c]</sup> |
|----------------------|----------------------|--------------------------|-----------------------|
| 1                    | Mg(OTf) <sub>2</sub> | 65                       | 86.5:13.5             |
| 2                    | Ni(OTf) <sub>2</sub> | 74                       | 63.5:36.5             |
| 3                    | Zn(OTf) <sub>2</sub> | 35                       | 69:31                 |
| 4                    | La(OTf) <sub>3</sub> | 34                       | 53.5:46.5             |
| 5                    | Sc(OTf) <sub>3</sub> | 36                       | 60:40                 |
| 6                    | Y(OTf) <sub>3</sub>  | 39                       | 75:25                 |
| 7                    | Yb(OTf) <sub>3</sub> | 34                       | 73.5:26.5             |
| 8                    | In(OTf) <sub>3</sub> | 33                       | 52.5:47.5             |

[a] All reactions were carried out with metal salt/L<sub>3</sub>-PrPr<sub>2</sub> (1:1, 10 mol%), **6a** (0.10 mmol), **1a** (0.15 mmol) in DCE (1.0 mL) at 50 °C for 72 h. [b] Yield of isolated product. [c] Determined by HPLC analysis on a chiral stationary phase.

**Table S13** Ligand effect

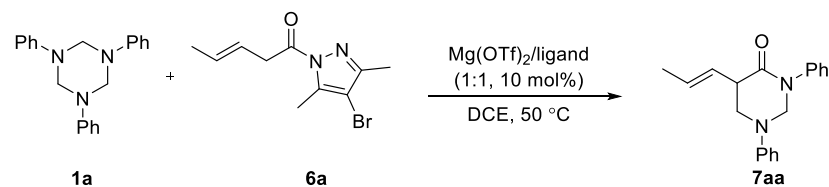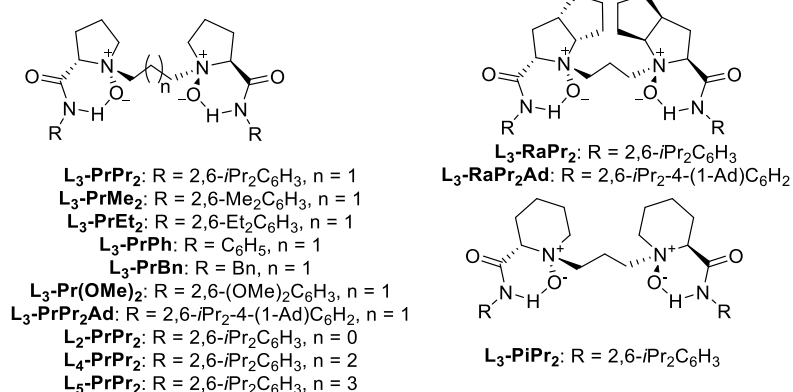

| entry <sup>[a]</sup> | ligand                            | yield (%) <sup>[b]</sup> | er (%) <sup>[c]</sup> |
|----------------------|-----------------------------------|--------------------------|-----------------------|
| 1                    | L <sub>3</sub> -PrPr <sub>2</sub> | 73                       | 93:7                  |
| 2                    | L <sub>3</sub> -PiPr <sub>2</sub> | 65                       | 86.5:13.5             |
| 3                    | L <sub>3</sub> -RaPr <sub>2</sub> | 64                       | 90:10                 |
| 4                    | L <sub>3</sub> -PrPh              | 39                       | 50:50                 |
| 5                    | L <sub>3</sub> -PrMe <sub>2</sub> | 50                       | 88:12                 |
| 6                    | L <sub>3</sub> -PrEt <sub>2</sub> | 60                       | 89.5:10.5             |
| 7                    | L <sub>2</sub> -PrPr <sub>2</sub> | 26                       | 80:20                 |
| 8                    | L <sub>4</sub> -PrPr <sub>2</sub> | 63                       | 94:6                  |
| 9                    | L <sub>5</sub> -PrPr <sub>2</sub> | 66                       | 92.5:7.5              |
| 10                   | L <sub>3</sub> -PrBn              | 35                       | 77.5:22.5             |

[a] All reactions were carried out with Mg(OTf)<sub>2</sub>/ligand (1:1, 10 mol%), **6a** (0.10 mmol), **1a** (0.15 mmol) in DCE (1.0 mL) at 50 °C for 72 h. [b] Yield of isolated product. [c] Determined by HPLC analysis on a chiral stationary phase.

Table S14 Solvent effect

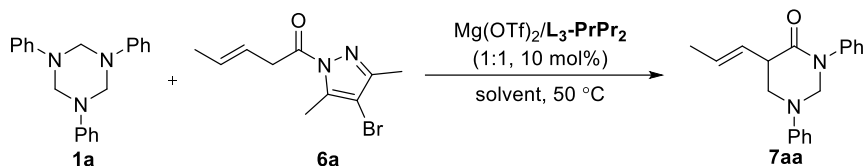

| entry <sup>[a]</sup> | solvent                              | yield (%) <sup>[b]</sup> | er (%) <sup>[c]</sup> |
|----------------------|--------------------------------------|--------------------------|-----------------------|
| 1                    | DCE                                  | 73                       | 93:7                  |
| 2                    | EtOAc                                | N.R.                     | --                    |
| 3                    | CH <sub>3</sub> CN                   | 62                       | 82.5:17.5             |
| 4                    | Acetone                              | 41                       | 65:35                 |
| 5                    | THF                                  | N.R.                     | --                    |
| 6                    | ClCH <sub>2</sub> CH <sub>2</sub> Cl | 73                       | 93:7                  |
| 7                    | Toluene                              | N.R.                     | --                    |
| 8                    | CHCl <sub>3</sub>                    | 71                       | 92.5:7.5              |
| 9                    | Cl <sub>2</sub> CHCHCl <sub>2</sub>  | 59                       | 92:8                  |
| 10                   | Cl <sub>2</sub> CHCH <sub>2</sub> Cl | 79                       | 92:8                  |

[a] All reactions were carried out with Mg(OTf)<sub>2</sub>/L<sub>3</sub>-PrPr<sub>2</sub> (1:1, 10 mol%), **6a** (0.10 mmol), **1a** (0.15 mmol) in solvent (1.0 mL) at 50 °C for 72 h. [b] Yield of isolated product. [c] Determined by HPLC analysis on a chiral stationary phase.

Table S15 Additive effect

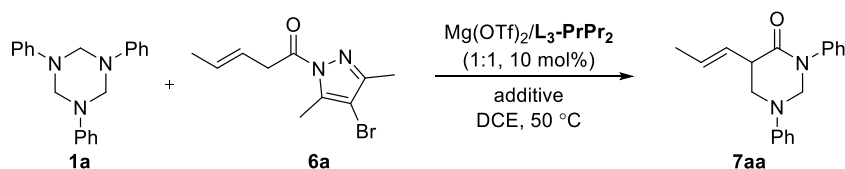

| entry <sup>[a]</sup> | additive                                 | yield (%) <sup>[b]</sup> | er (%) <sup>[c]</sup> |
|----------------------|------------------------------------------|--------------------------|-----------------------|
| 1                    | 3Å MS (20 mg)                            | 65                       | 93.5:6.5              |
| 2                    | 4Å MS (20 mg)                            | 56                       | 82:18                 |
| 3                    | 5Å MS (20 mg)                            | 87                       | 89:11                 |
| 4                    | NH <sub>4</sub> Cl (20 mol%)             | 68                       | 90:10                 |
| 5                    | PhCOOH (20 mol%)                         | 63                       | 50:50                 |
| 6                    | Et <sub>3</sub> N (20 mol%)              | N.R.                     | --                    |
| 7                    | K <sub>2</sub> CO <sub>3</sub> (20 mol%) | N.R.                     | --                    |
| 8                    | H <sub>2</sub> O (20 mol%)               | 75                       | 86.5:13.5             |
| 9                    | PhNH <sub>2</sub> (20 mol%)              | 88                       | 93.5:6.5              |
| 10                   | --                                       | 73                       | 93:7                  |

[a] All reactions were carried out with Mg(OTf)<sub>2</sub>/L<sub>3</sub>-PrPr<sub>2</sub> (1:1, 10 mol%), **6a** (0.10 mmol), **1a** (0.15 mmol), additive in DCE (1.0 mL) at 50 °C for 72 h. [b] Yield of isolated product. [c] Determined by HPLC analysis on a chiral stationary phase.

Table S16 Metal salt/ligand ratio effect

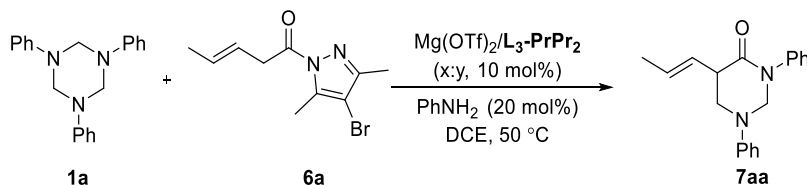

| entry <sup>[a]</sup> | Mg(OTf) <sub>2</sub> :L <sub>3</sub> -PrPr <sub>2</sub> | yield (%) <sup>[b]</sup> | er (%) <sup>[c]</sup> |
|----------------------|---------------------------------------------------------|--------------------------|-----------------------|
| 1                    | 2:1                                                     | 69                       | 90.5:9.5              |
| 2                    | 1.1:1                                                   | 73                       | 93.5:6.5              |
| 3                    | 1:1                                                     | 88                       | 93.5:6.5              |
| 4                    | 1:1.1                                                   | 81                       | 93:7                  |
| 5                    | 1:1.2                                                   | 80                       | 93:7                  |
| 6                    | 1:1.5                                                   | 69                       | 93:7                  |
| 7                    | 1:2                                                     | 55                       | 93.5:6.5              |

[a] All reactions were carried out with Mg(OTf)<sub>2</sub>/L<sub>3</sub>-PrPr<sub>2</sub> (g:h, 10 mol%), **6a** (0.10 mmol), **1a** (0.15 mmol), PhNH<sub>2</sub> (20 mol%) in DCE (1.0 mL) at 50 °C for 72 h. [b] Yield of isolated product. [c] Determined by HPLC analysis on a chiral stationary phase.

**Table S17** Solvent dosage effect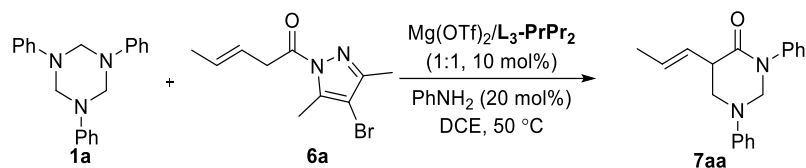

| entry <sup>[a]</sup> | DCE (mL) | yield (%) <sup>[b]</sup> | er (%) <sup>[c]</sup> |
|----------------------|----------|--------------------------|-----------------------|
| 1                    | 0.2      | 65                       | 79:21                 |
| 2                    | 0.5      | 70                       | 86.5:13.5             |
| 3                    | 1.0      | 89                       | 93.5:6.5              |
| 4                    | 1.2      | 86                       | 93:7                  |
| 5                    | 1.5      | 80                       | 93:7                  |
| 6                    | 2.0      | 71                       | 92.5:7.5              |

[a] All reactions were carried out with Mg(OTf)<sub>2</sub>/L<sub>3</sub>-PrPr<sub>2</sub> (1:1, 10 mol%), **6a** (0.10 mmol), **1a** (0.15 mmol), PhNH<sub>2</sub> (20 mol%) in DCE at 50 °C for 72 h. [b] Yield of isolated product. [c] Determined by HPLC analysis on a chiral stationary phase.

**Table S18** Temperature effect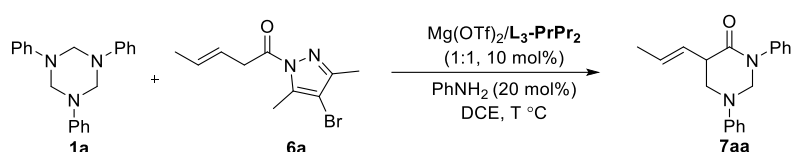

| entry <sup>[a]</sup> | T (°C) | yield (%) <sup>[b]</sup> | er (%) <sup>[c]</sup> |
|----------------------|--------|--------------------------|-----------------------|
| 1 <sup>[d]</sup>     | 30     | 33                       | 99:1                  |
| 2 <sup>[d]</sup>     | 35     | 45                       | 99:1                  |
| 3 <sup>[d]</sup>     | 40     | 56                       | 97.5:2.5              |
| 4 <sup>[d]</sup>     | 45     | 66                       | 96:4                  |
| 5                    | 50     | 88                       | 93.5:6.5              |
| 6                    | 55     | 90                       | 86.5:13.5             |
| 7                    | 60     | 85                       | 75.5:24.5             |
| 8                    | 70     | 74                       | 53.5:46.5             |
| 9                    | 80     | messy                    | --                    |

[a] All reactions were carried out with Mg(OTf)<sub>2</sub>/L<sub>3</sub>-PrPr<sub>2</sub> (1:1, 10 mol%), **6a** (0.10 mmol), **1a** (0.15 mmol), PhNH<sub>2</sub> (20 mol%) in DCE (1.0 mL) at T °C for 120 h. [b] Yield of isolated product. [c] Determined by HPLC analysis on a chiral stationary phase. [d] The reaction time was longed to 120 h.

**Table S19** The effect of the amount of PhNH<sub>2</sub>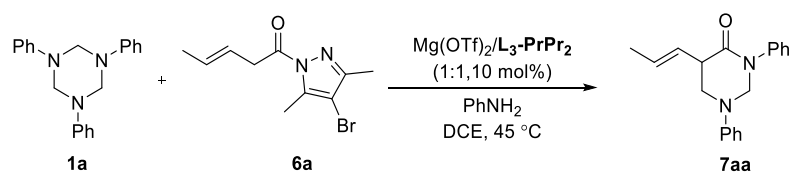

| entry <sup>[a]</sup> | PhNH <sub>2</sub> (mol%) | yield (%) <sup>[b]</sup> | er (%) <sup>[c]</sup> |
|----------------------|--------------------------|--------------------------|-----------------------|
| 1                    | 0                        | 33                       | 96:4                  |
| 2                    | 10                       | 48                       | 96:4                  |
| 3                    | 20                       | 66                       | 96:4                  |
| 4                    | 30                       | 70                       | 95.5:4.5              |
| 5                    | 40                       | 88                       | 96:4                  |
| 6                    | 50                       | 88                       | 95:5                  |
| 7                    | 70                       | 90                       | 93:7                  |
| 8                    | 100                      | 93                       | 93.5:6.5              |

[a] All reactions were carried out with Mg(OTf)<sub>2</sub>/L<sub>3</sub>-PrPr<sub>2</sub> (1:1, 10 mol%), **6a** (0.10 mmol), **1a** (0.15 mmol), PhNH<sub>2</sub> in DCE (1.0 mL) at 45 °C for 120 h. [b] Yield of isolated product. [c] Determined by HPLC analysis on a chiral stationary phase.

## 9. Possible reaction pathways for β,γ-unsaturated pyrazole amide

Based on experiments, reaction mechanism similar to azlactone was proposed (Scheme S3). Reagents **I** and **II** competitively react with pyrazole amide **6**, then intermediate **A** and **B** were respectively obtained. **A** and **B** could mutually transform via Mannich/retro-Mannich reaction. Losing a pyrazole as leaving group, substituted hydroypyrimidin-4(1H)-one **7** was obtained.

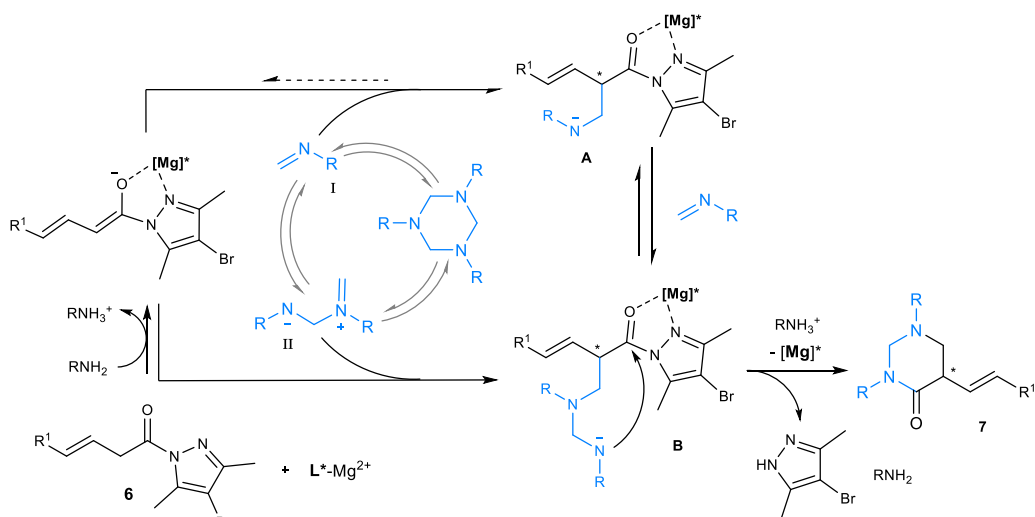

Scheme S3 Possible reaction pathways for  $\beta,\gamma$ -unsaturated pyrazole amide

## 10. Determination of absolute configurations of the compounds

Crystals suitable for the X-ray crystal structure analysis were obtained from a solution of compound **3ac** in DCM (ca. 1 mL) and petroleum ether (1 mL) at r.t. The colourless crystal in flake-shape, with approximate dimensions of  $0.046 \times 0.083 \times 0.451 \text{ mm}^3$ , was selected and mounted for the single-crystal X-ray diffraction. The data set was collected by Bruker D8 Venture Photon II diffractometer at 172(2) K equipped with micro-focus Cu radiation source ( $K_{\alpha} = 1.54178 \text{ \AA}$ ). Applied with face-indexed numerical absorption correction, the structure solution was solved and refinement was processed by SHELXTL (version 6.14) and OLEX 2.3 program package<sup>5,6,7,8</sup>. The structure was analyzed by ADDSYM routine implemented in PLATON suite and no higher symmetry was suggested<sup>9</sup>. The crystal data and further details are listed in Table S20. CCDC 2096416 which contains the crystallographic data for the structure have been deposited with the Cambridge Crystallographic Data Centre (CCDC), 12 Union Road, Cambridge CB2 1EZ, UK, which can be obtained free of charge via Fax: +44 (0)1223 336033; E-Mail: deposit@ccdc.cam.ac.uk, <https://www.ccdc.cam.ac.uk/structures/>.

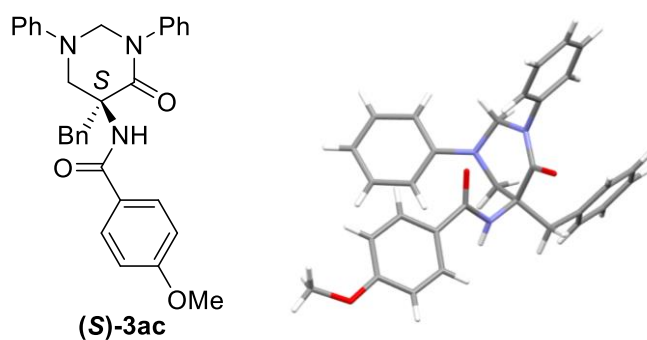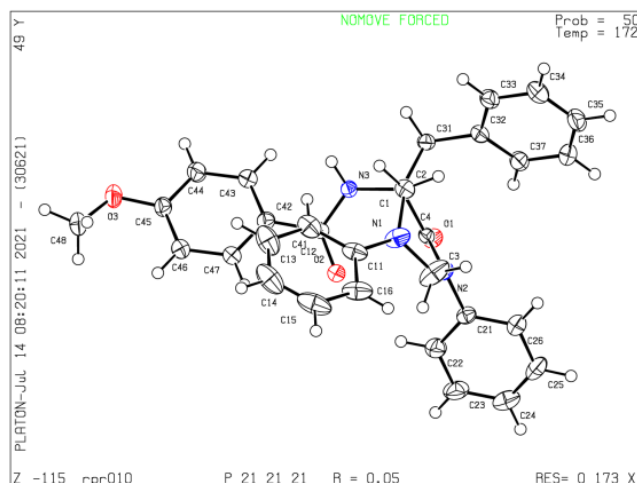

Figure S3 the thermal ellipsoid figure of **3ad** with 50% probabilities

**Table S20 Crystallographic Data for C<sub>31</sub>H<sub>29</sub>N<sub>3</sub>O<sub>3</sub>.**

|                                                   |                                                               |
|---------------------------------------------------|---------------------------------------------------------------|
| Formula                                           | C <sub>31</sub> H <sub>29</sub> N <sub>3</sub> O <sub>3</sub> |
| Formula mass (amu)                                | 491.57                                                        |
| Space group                                       | P2 <sub>1</sub> 2 <sub>1</sub> 2 <sub>1</sub>                 |
| <i>a</i> (Å)                                      | 10.0721(3)                                                    |
| <i>b</i> (Å)                                      | 12.0628(4)                                                    |
| <i>c</i> (Å)                                      | 20.9044(6)                                                    |
| $\alpha$ (deg)                                    | 90                                                            |
| $\beta$ (deg)                                     | 90                                                            |
| $\gamma$ (deg)                                    | 90                                                            |
| <i>V</i> (Å <sup>3</sup> )                        | 2540.05(13)                                                   |
| <i>Z</i>                                          | 4                                                             |
| $\lambda$ (Å)                                     | 1.54178                                                       |
| <i>T</i> (K)                                      | 172                                                           |
| $\rho_{\text{calcd}}$ (g cm <sup>-3</sup> )       | 1.285                                                         |
| $\mu$ (mm <sup>-1</sup> )                         | 0.667                                                         |
| Transmission factors                              | 0.676–1.000                                                   |
| $\theta_{\text{max}}$ (deg)                       | 68.129                                                        |
| No. of unique data, including $F_o^2 < 0$         | 4449                                                          |
| No. of unique data, with $F_o^2 > 2\sigma(F_o^2)$ | 4014                                                          |
| No. of variables                                  | 340                                                           |
| $R(F)$ for $F_o^2 > 2\sigma(F_o^2)$ <sup>a</sup>  | 0.0485                                                        |
| $R_w(F_o^2)$ <sup>b</sup>                         | 0.1303                                                        |
| Goodness of fit                                   | 1.088                                                         |

<sup>a</sup>  $R(F) = \sum ||F_o| - |F_c|| / \sum |F_o|$ .

<sup>b</sup>  $R_w(F_o^2) = [\sum [w(F_o^2 - F_c^2)^2] / \sum wF_o^4]^{1/2}$ ;  $w^{-1} = [\sigma^2(F_o^2) + (Ap)^2 + Bp]$ , where  $p = [\max(F_o^2, 0) + 2F_c^2] / 3$ .



# 11. Analysis results of 2D NMR spectra of the product 3ac

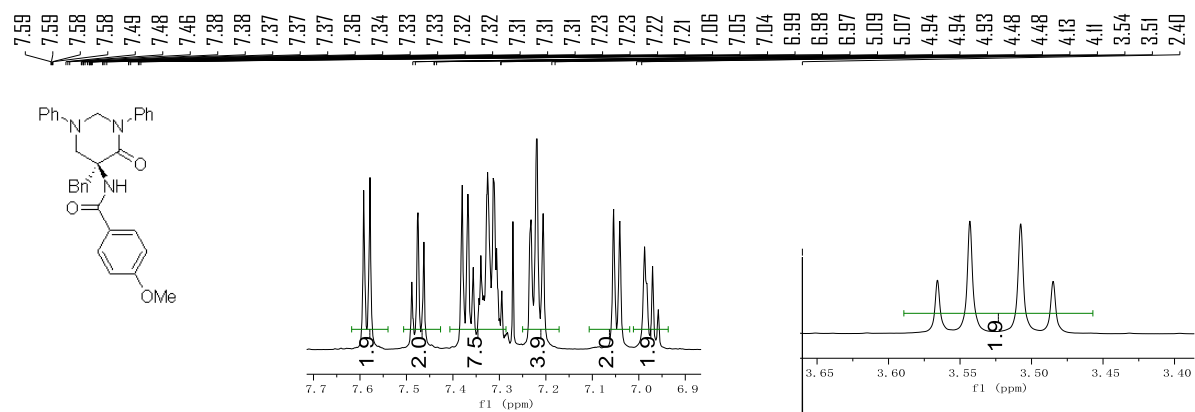

<sup>1</sup>H NMR (600 MHz, Chloroform-d<sub>3</sub>) δ 7.59 (d, J = 8.2 Hz, 2H), 7.48 (d = 7.8 Hz, 2H), 7.39 – 7.35 (m, 3H), 7.35 – 7.29 (m, 4H), 7.22 (m, 4H), 7.09 – 7.02 (m, 2H), 7.01 – 6.94 (m, 2H), 5.08 (dd, J = 10.5, 1.6 Hz, 1H), 4.93 (dd, J = 13.4, 1.6 Hz, 1H), 4.49 (dd, J = 13.4, 1.6 Hz, 1H), 4.12 (dd, J = 13.4 Hz, 1H), 3.53 (q, 2H), 2.40 (s, 3H).

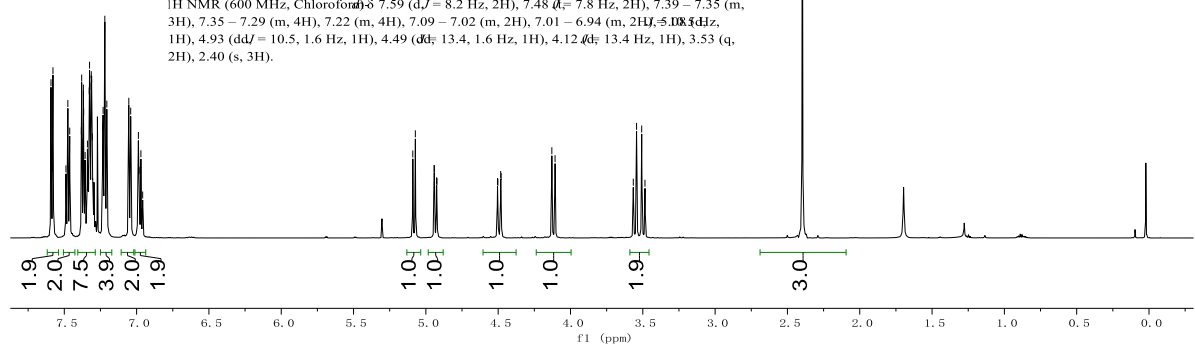

<sup>13</sup>C NMR (151 MHz, CDCl<sub>3</sub>) peaks (ppm): 170.10, 167.03, 147.63, 142.12, 140.50, 135.41, 131.44, 130.52, 129.51, 129.44, 129.18, 128.56, 127.53, 127.33, 126.94, 126.25, 121.18, 116.93.

77.21, 77.00, 76.79, 68.18, 59.90, 55.10, 41.57, 21.42.

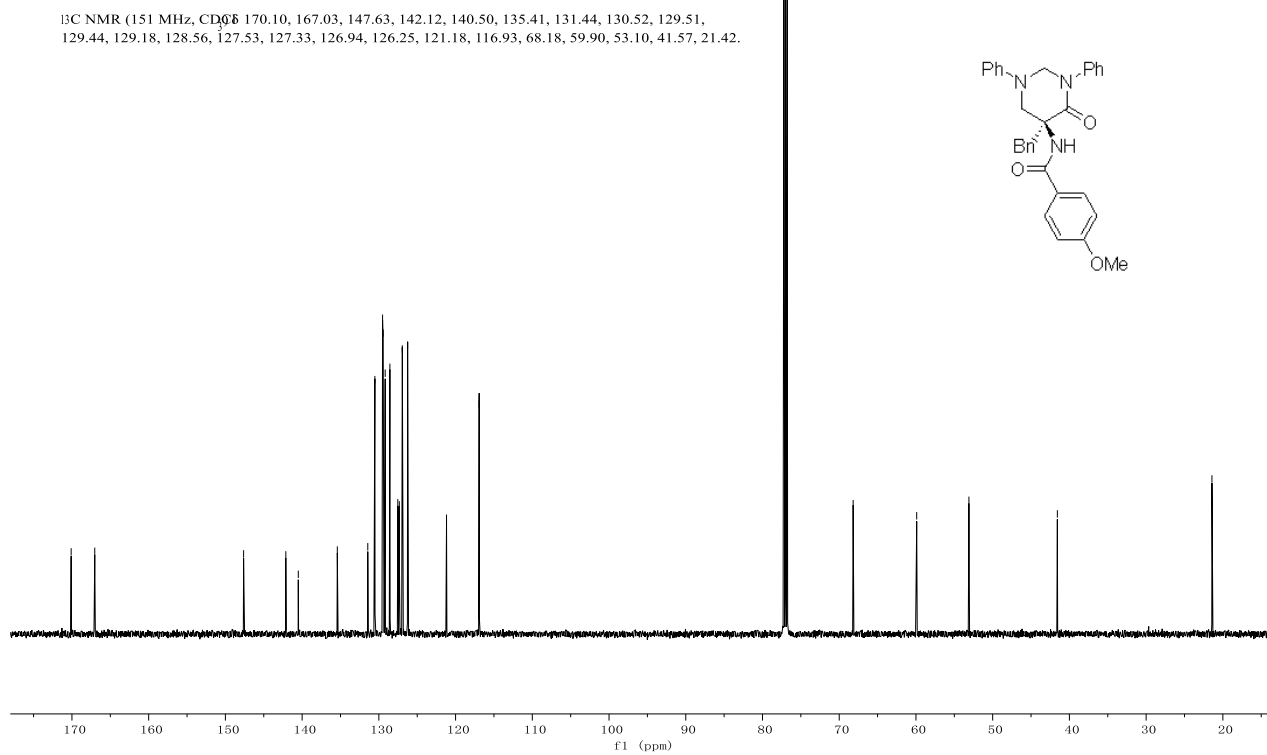

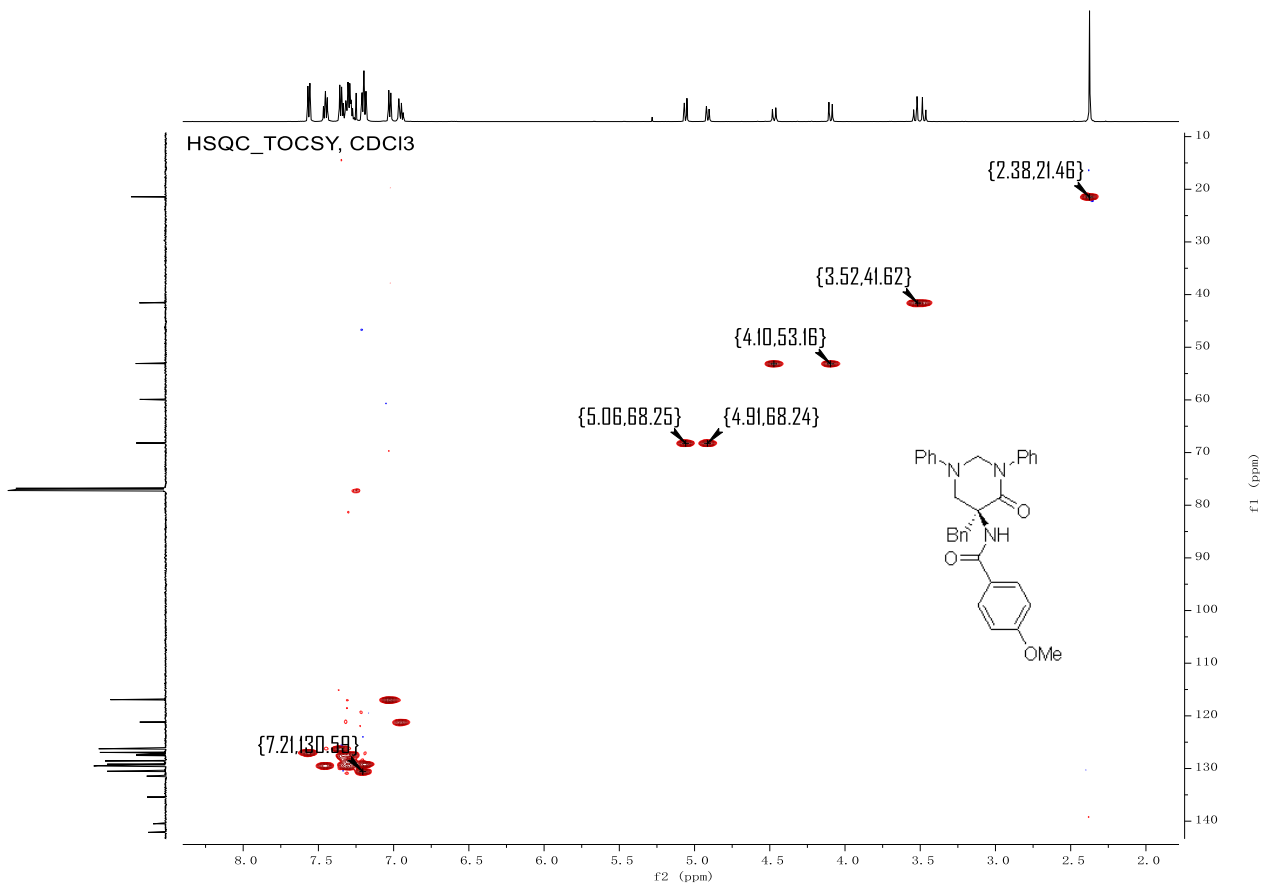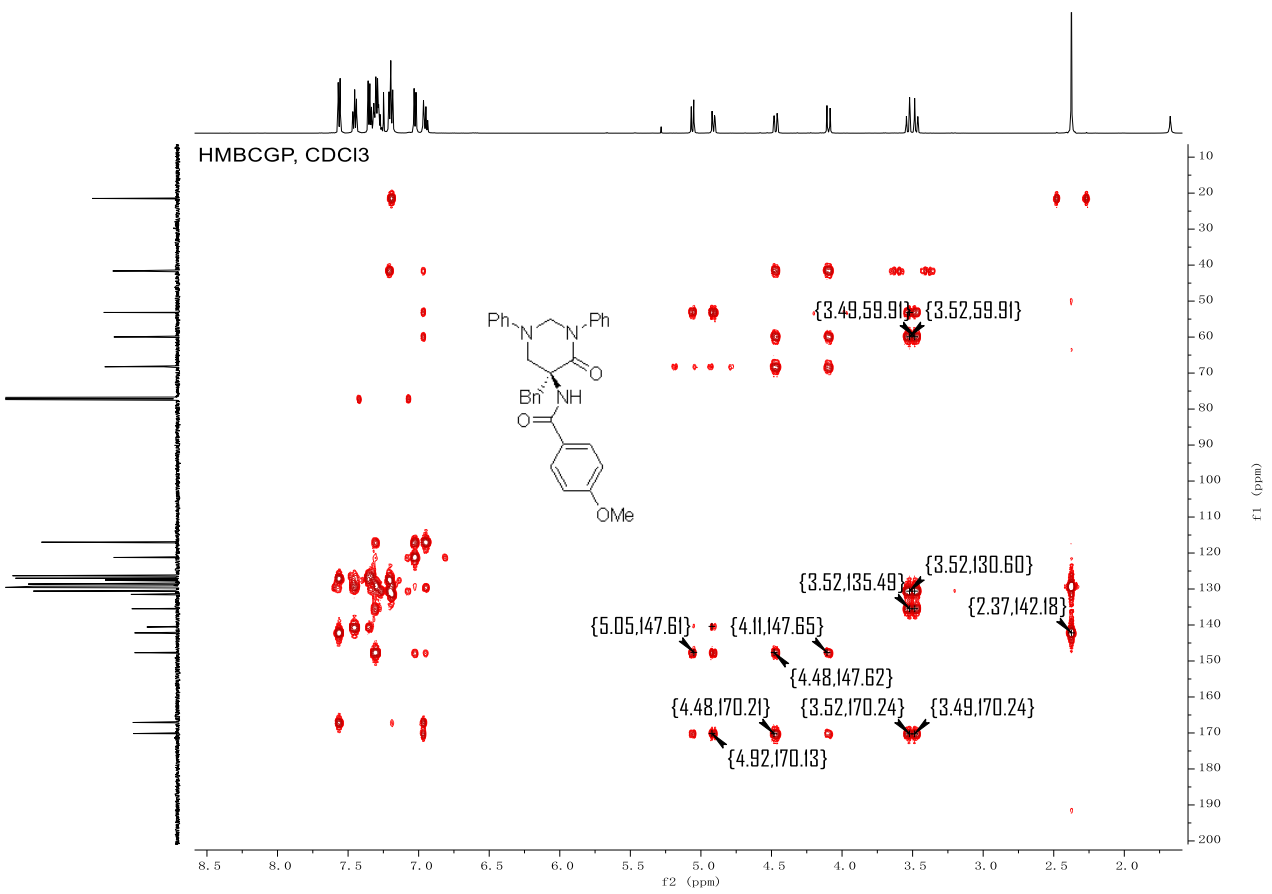

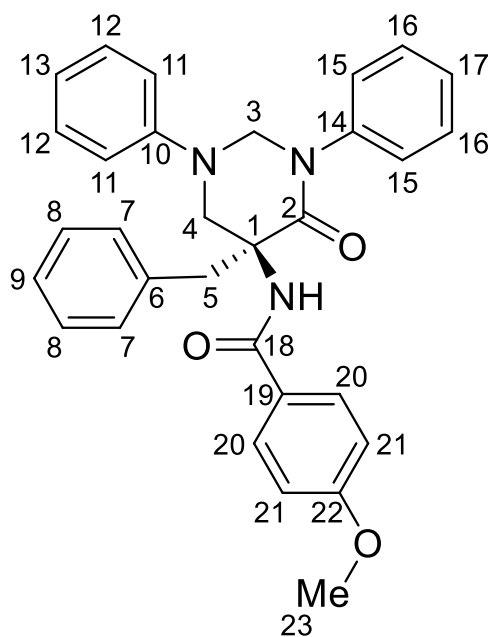

| Number of Atom | H (ppm)           | C (ppm)     |
|----------------|-------------------|-------------|
| 1              | --                | 59.9        |
| 2              | --                | 170.2       |
| 3              | 4.93(dd), 5.08(d) | 68.2        |
| 4              | 4.12(d), 4.49(dd) | 53.2        |
| 5              | 3.53(q)           | 41.6        |
| 6              | --                | 135.5       |
| 7              | 7.22(t)           | 130.6       |
| 8              | 7.02-7.59         | 116.0-131.5 |
| 9              | 7.02-7.59         | 116.0-131.5 |
| 10             | --                | 147.6       |
| 11             | 7.02-7.59         | 116.0-131.5 |
| 12             | 7.02-7.59         | 116.0-131.5 |
| 13             | 7.02-7.59         | 116.0-131.5 |
| 14             | --                | 140.4       |
| 15             | 7.02-7.59         | 116.0-131.5 |
| 16             | 7.02-7.59         | 116.0-131.5 |
| 17             | 7.02-7.59         | 116.0-131.5 |
| 18             | --                | 167.0       |
| 19             | --                | 116.0-131.5 |
| 20             | 7.02-7.59         | 116.0-131.5 |
| 21             | 7.02-7.59         | 116.0-131.5 |
| 22             | --                | 142.2       |
| 23             | 2.40 (s)          | 21.5        |

## 12. Characterization of products

### (S)-N-(5-benzyl-4-oxo-1,3-diphenylhexahydropyrimidin-5-yl)benzamide (3aa)

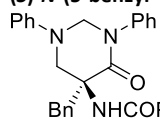

32.8 mg, 71% yield; white solid, melting point: 67.1-72.6 °C,  $[\alpha]_D^{25} = -41.0$  ( $c = 0.65$ ,  $\text{CH}_2\text{Cl}_2$ ).

Dissolved in MeOH for SFC; SFC (Daicel chiralcel OX-3,  $\text{CO}_2/\text{EtOH} = 80/20$ , flow rate = 1.5 mL/min,  $\lambda = 254$  nm) retention time:  $t_{\text{minor}} = 5.72$  min,  $t_{\text{major}} = 13.66$  min. er = 95:5.

$^1\text{H NMR}$  (400 MHz,  $\text{Chloroform-}d$ )  $\delta$  7.72 – 7.60 (m, 2H), 7.52 – 7.40 (m, 3H), 7.40 – 7.25 (m, 10H), 7.23 – 7.15 (m, 2H), 7.06 – 6.97 (m, 3H), 6.94 (t,  $J = 7.3$ , 1.1 Hz, 1H), 5.04 (d,  $J = 10.5$  Hz, 1H), 4.89 (dd,  $J = 10.6$ , 1.6 Hz, 1H), 4.45 (dd,  $J = 13.4$ , 1.6 Hz, 1H), 4.10 (d,  $J = 13.4$  Hz, 1H), 3.48 (m, 2H).

$^{13}\text{C NMR}$  (101 MHz,  $\text{CDCl}_3$ )  $\delta$  170.1, 167.1, 147.7, 140.5, 135.4, 134.3, 131.7, 130.6, 129.6, 129.5, 128.6, 128.6, 127.6, 127.4, 127.0, 126.3, 121.3, 117.0, 68.2, 60.0, 53.1, 41.6.

IR (neat):  $\nu$  ( $\text{cm}^{-1}$ ): 3318, 3060, 3032, 1651, 1490.

HRMS (ESI-TOF) calcd for  $\text{C}_{30}\text{H}_{28}\text{N}_3\text{O}_2^+$  ( $[\text{M}+\text{H}^+]$ ) = 462.2176, found 462.2170.

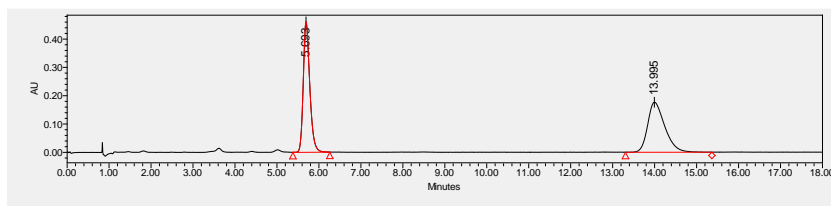

|   | Retention Time | Area    | % Area |
|---|----------------|---------|--------|
| 1 | 5.693          | 4959840 | 49.76  |
| 2 | 13.995         | 5008233 | 50.24  |

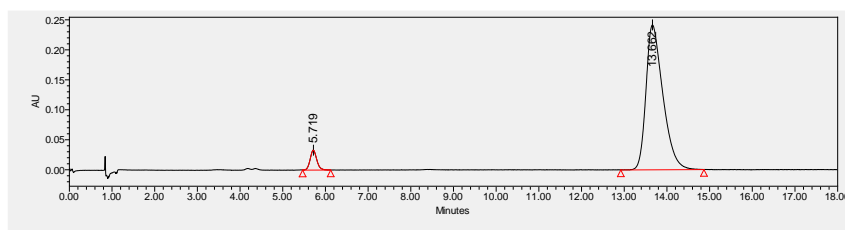

|   | Retention Time | Area    | % Area |
|---|----------------|---------|--------|
| 1 | 5.719          | 359738  | 5.14   |
| 2 | 13.662         | 6643964 | 94.86  |

**(S)-N-(5-benzyl-4-oxo-1,3-diphenylhexahydropyrimidin-5-yl)-4-fluorobenzamide (3ab)**

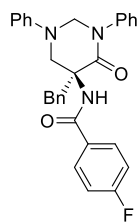

25.0 mg, 52% yield; white solid, melting point: 71.0-74.2 °C,  $[\alpha]_D^{27} = -45.7$  ( $c = 0.23$ ,  $\text{CH}_2\text{Cl}_2$ ).

Dissolved in MeOH for SFC; SFC (Daicel chiralcel OX-3,  $\text{CO}_2/\text{EtOH} = 80/20$ , flow rate = 1.5 mL/min,  $\lambda = 254$  nm) retention time:  $t_{\text{minor}} = 4.13$  min,  $t_{\text{major}} = 9.57$  min. er = 93:7.

$^1\text{H NMR}$  (400 MHz, Chloroform- $d$ )  $\delta$  7.72 – 7.60 (m, 2H), 7.54 – 7.41 (m, 2H), 7.39 – 7.28 (m, 8H), 7.24 – 7.16 (m, 2H), 7.12 – 7.00 (m, 4H), 7.00 – 6.89 (m, 2H), 5.05 (d,  $J = 10.6$  Hz, 1H), 4.92 (dd,  $J = 10.6, 1.5$  Hz, 1H), 4.47 (dd,  $J = 13.5, 1.6$  Hz, 1H), 4.12 (d,  $J = 13.4$  Hz, 1H), 3.53 (q, 2H).

$^{13}\text{C NMR}$  (101 MHz, Chloroform- $d$ )  $\delta$  170.1, 166.1, 147.7, 140.5, 135.4, 130.6, 129.7 (d,  $J_{\text{C-F}} = 6.5$  Hz), 129.4 (d,  $J_{\text{C-F}} = 9.0$  Hz), 128.7, 127.7, 127.5, 126.3, 117.0, 115.6 (d,  $J_{\text{C-F}} = 22.0$  Hz), 68.3, 60.2, 53.1, 41.7.

$^{19}\text{F NMR}$  (376 MHz,  $\text{CDCl}_3$ )  $\delta$  -107.79.

IR (neat):  $\nu(\text{cm}^{-1})$ : 3317, 3062, 2922, 1652, 1492.

HRMS (ESI-TOF) calcd for  $\text{C}_{30}\text{H}_{27}\text{FN}_3\text{O}_2^+$  ( $[\text{M}]+\text{H}^+$ ) = 480.2082, found 480.2076.

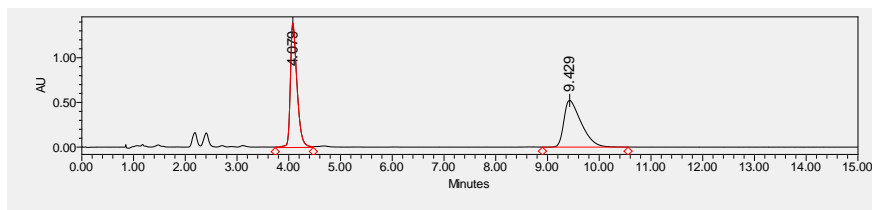

|   | Retention Time | Area     | % Area |
|---|----------------|----------|--------|
| 1 | 4.079          | 12382440 | 50.49  |
| 2 | 9.429          | 12140715 | 49.51  |

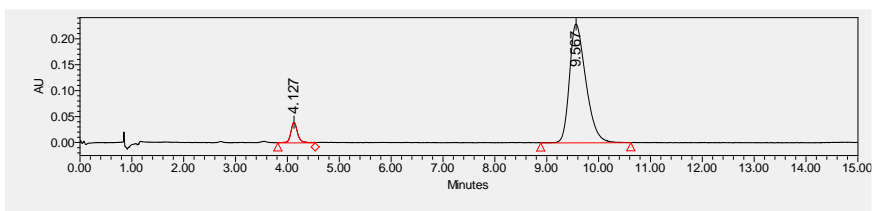

|   | Retention Time | Area    | % Area |
|---|----------------|---------|--------|
| 1 | 4.127          | 360461  | 6.69   |
| 2 | 9.567          | 5030362 | 93.31  |

**(S)-N-(5-benzyl-4-oxo-1,3-diphenylhexahydropyrimidin-5-yl)-4-methoxybenzamide (3ac)**

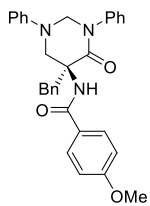

33.0 mg, 67% yield; white solid, melting point: 65.7-77.4 °C,  $[\alpha]_{27}^{20} = -45.4$  ( $c = 0.52$ ,  $\text{CH}_2\text{Cl}_2$ ).

Dissolved in MeOH for SFC; SFC (Daicel chiralcel OX-3,  $\text{CO}_2/\text{EtOH} = 80/20$ , flow rate = 1.5 mL/min,  $\lambda = 254$  nm) retention time:  $t_{\text{minor}} = 8.50$  min,  $t_{\text{major}} = 19.18$  min. er = 96:4.

$^1\text{H NMR}$  (400 MHz, Chloroform- $d$ )  $\delta$  7.63 – 7.52 (m, 2H), 7.51 – 7.41 (m, 2H), 7.41 – 7.28 (m, 7H), 7.24 – 7.15 (m, 4H), 7.09 – 6.91 (m, 4H), 5.07 (d,  $J = 10.6$  Hz, 1H), 4.92 (dd,  $J = 10.5, 1.6$  Hz, 1H), 4.48 (dd,  $J = 13.4, 1.7$  Hz, 1H), 4.10 (d,  $J = 13.4$  Hz, 1H), 3.51 (q,  $J = 13.6$  Hz, 2H), 2.39 (s, 3H).

$^{13}\text{C NMR}$  (101 MHz,  $\text{CDCl}_3$ )  $\delta$  170.2, 167.1, 147.7, 142.2, 135.5, 131.5, 130.6, 129.6, 129.5, 129.3, 128.7, 127.6, 127.4, 127.0, 126.3, 121.3, 117.0, 68.3, 60.0, 53.2, 41.7, 21.5.

IR (neat):  $\nu(\text{cm}^{-1})$  3332, 3032, 2929, 1650, 1602, 1492.

HRMS (ESI-TOF) calcd for  $\text{C}_{31}\text{H}_{30}\text{N}_3\text{O}_3^+$  ( $[\text{M}+\text{H}^+]$ ) = 492.2282, found 492.2292.

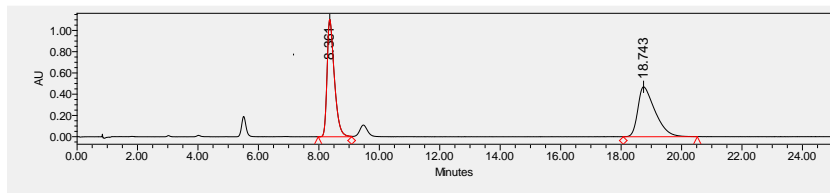

|   | Retention Time | Area     | % Area |
|---|----------------|----------|--------|
| 1 | 8.361          | 18411899 | 49.94  |
| 2 | 18.743         | 18458405 | 50.06  |

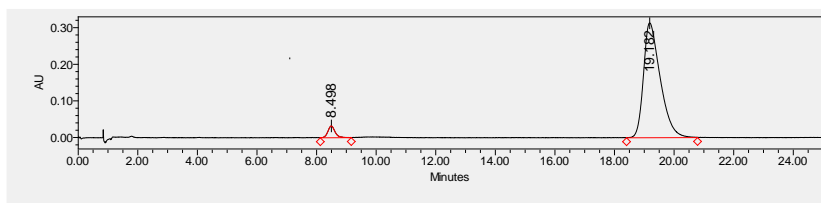

|   | Retention Time | Area     | % Area |
|---|----------------|----------|--------|
| 1 | 8.498          | 545674   | 4.27   |
| 2 | 19.182         | 12234418 | 95.73  |

**(S)-N-(5-benzyl-4-oxo-1,3-diphenylhexahydropyrimidin-5-yl)-4-methylbenzamide (3ad)**

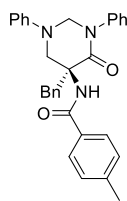

37.1 mg, 78% yield; white solid, melting point: 64.2-68.4 °C,  $[\alpha]_D^{27} = -42.6$  ( $c = 0.57$ ,  $\text{CH}_2\text{Cl}_2$ ).

Dissolved in MeOH for SFC; SFC (Daicel chiralcel OX-3,  $\text{CO}_2/\text{EtOH} = 80/20$ , flow rate = 1.5 mL/min,  $\lambda = 254$  nm) retention time:

$t_{\text{minor}} = 8.52$  min,  $t_{\text{major}} = 19.97$  min. er = 96:4.

$^1\text{H NMR}$  (400 MHz,  $\text{Chloroform-}d$ )  $\delta$  7.69 – 7.59 (m, 2H), 7.51 – 7.42 (m, 2H), 7.40 – 7.28 (m, 7H), 7.25 – 7.18 (m, 2H), 7.07 – 6.99 (m, 2H), 6.99 – 6.93 (m, 1H), 6.92 – 6.86 (m, 3H), 5.07 (d,  $J = 10.5$  Hz, 1H), 4.92 (dd,  $J = 10.6, 1.6$  Hz, 1H), 4.46 (dd,  $J = 13.4, 1.6$  Hz, 1H), 4.09 (d,  $J = 13.4$  Hz, 1H), 3.84 (s, 3H), 3.51 (q,  $J = 13.6$  Hz, 2H).

$^{13}\text{C NMR}$  (101 MHz,  $\text{CDCl}_3$ )  $\delta$  170.3, 166.7, 162.4, 147.7, 140.6, 135.5, 130.6, 129.6, 129.5, 128.9, 128.7, 127.6, 127.4, 126.6, 126.3, 121.3, 117.0, 113.8, 68.3, 59.9, 55.5, 53.2, 41.7.

IR (neat):  $\nu(\text{cm}^{-1})$  3390, 3032, 2931, 1650, 1602, 1492.

HRMS (ESI-TOF) calcd for  $\text{C}_{24}\text{H}_{23}\text{N}_3\text{O}_2^+$  ( $[\text{M}]-\text{PhCH}_2+\text{H}^+$ ) = 385.1785, found 385.1790.

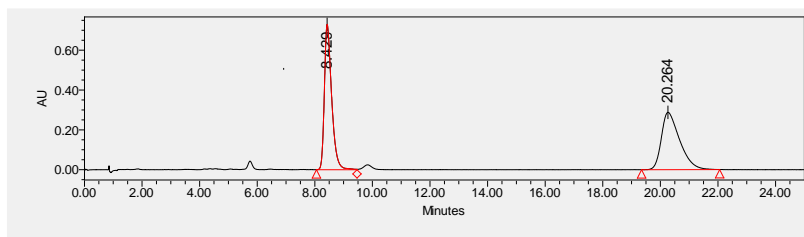

|   | Retention Time | Area     | % Area |
|---|----------------|----------|--------|
| 1 | 8.429          | 12768769 | 50.13  |
| 2 | 20.264         | 12703611 | 49.87  |

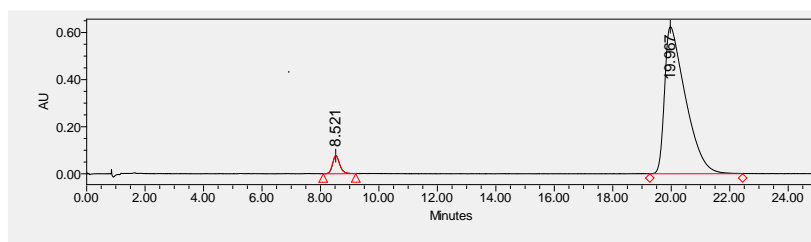

|   | Retention Time | Area     | % Area |
|---|----------------|----------|--------|
| 1 | 8.521          | 1327123  | 4.11   |
| 2 | 19.967         | 30992290 | 95.89  |

**(S)-N-(5-benzyl-4-oxo-1,3-diphenylhexahydropyrimidin-5-yl)-4-isopropylbenzamide (3ae)**

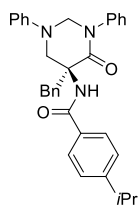

35.3 mg, 70% yield; white solid, melting point: 71.0-74.0 °C,  $[\alpha]^{27}_D = -45.5$  ( $c = 0.47$ ,  $\text{CH}_2\text{Cl}_2$ ).

Dissolved in MeOH for SFC; SFC (Daicel chiralcel IB-3,  $\text{CO}_2/\text{MeOH} = 80/20$ , flow rate = 1.5 mL/min,  $\lambda = 254$  nm) retention time:  $t_{\text{major}} = 4.46$  min,  $t_{\text{minor}} = 6.93$  min. er = 95:5.

$^1\text{H NMR}$  (400 MHz, Chloroform- $d$ )  $\delta$  7.63 – 7.53 (m, 2H), 7.49 – 7.39 (m, 2H), 7.37 – 7.26 (m, 7H), 7.25 – 7.16 (m, 4H), 7.06 – 6.89 (m, 4H), 5.05 (d,  $J = 10.5$  Hz, 1H), 4.89 (dd,  $J = 10.5$ , 1.6 Hz, 1H), 4.45 (dd,  $J = 13.4$ , 1.6 Hz, 1H), 4.07 (d,  $J = 13.4$  Hz, 1H), 3.50 (q, 2H), 3.02 – 2.81 (m, 1H), 1.23 (d,  $J = 7.0$  Hz, 6H).

$^{13}\text{C NMR}$  (101 MHz,  $\text{CDCl}_3$ )  $\delta$  170.2, 167.1, 153.0, 147.7, 140.6, 135.5, 131.9, 130.6, 129.6, 129.5, 128.7, 127.6, 127.4, 127.2, 126.7, 126.3, 121.3, 117.0, 68.3, 60.0, 53.2, 41.7, 34.2, 23.8.

**IR** (neat):  $\nu(\text{cm}^{-1})$  3390, 2961, 1654, 1492.

**HRMS** (ESI-TOF) calcd for  $\text{C}_{33}\text{H}_{34}\text{N}_3\text{O}_2^+$  ( $[\text{M}+\text{H}^+]$ ) = 504.2646, found 504.2630.

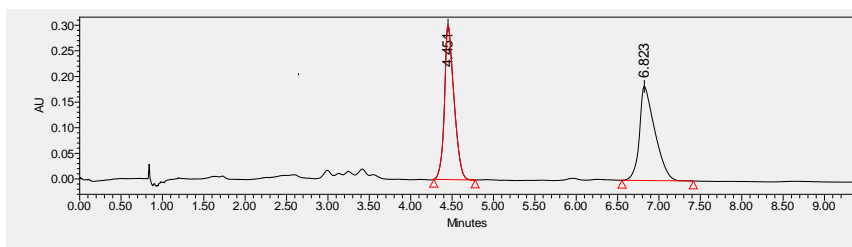

|   | Retention Time | Area    | % Area |
|---|----------------|---------|--------|
| 1 | 4.451          | 2411795 | 50.38  |
| 2 | 6.823          | 2375627 | 49.62  |

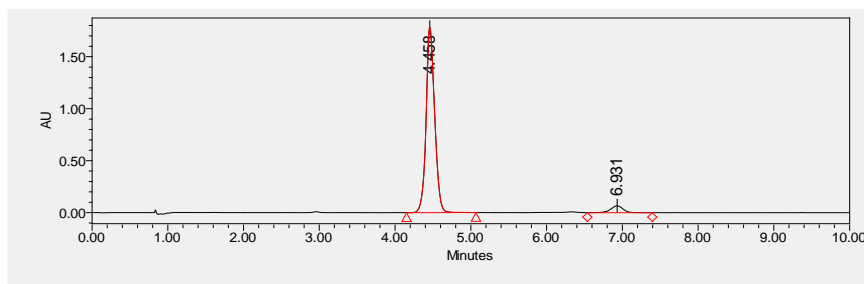

|   | Retention Time | Area     | % Area |
|---|----------------|----------|--------|
| 1 | 4.458          | 14003887 | 94.88  |
| 2 | 6.931          | 755634   | 5.12   |



**(S)-N-(5-benzyl-4-oxo-1,3-diphenylhexahydropyrimidin-5-yl)-3-methylbenzamide (3af)**

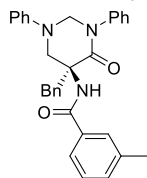

31.9 mg, 67% yield; white solid, melting point: 60.6-66.6 °C,  $[\alpha]_D^{27} = -45.0$  ( $c = 0.34$ ,  $\text{CH}_2\text{Cl}_2$ ).

Dissolved in MeOH for SFC; SFC (Daicel chiralcel OX-3,  $\text{CO}_2/\text{EtOH} = 80/20$ , flow rate = 1.5 mL/min,  $\lambda = 254$  nm) retention time:  $t_{\text{minor}} = 5.88$  min,  $t_{\text{major}} = 16.24$  min. er = 94:6.

$^1\text{H NMR}$  (400 MHz, Chloroform- $d$ )  $\delta$  7.55 – 7.40 (m, 4H), 7.40 – 7.28 (m, 9H), 7.25 – 7.18 (m, 2H), 7.08 – 6.92 (m, 4H), 5.06 (d,  $J = 10.6$  Hz, 1H), 4.92 (dd,  $J = 10.6, 1.6$  Hz, 1H), 4.49 (dd,  $J = 13.4, 1.6$  Hz, 1H), 4.13 (d,  $J = 13.4$  Hz, 1H), 3.53 (dd,  $J = 21.4, 13.6$  Hz, 2H), 2.37 (s, 3H).

$^{13}\text{C NMR}$  (101 MHz,  $\text{CDCl}_3$ )  $\delta$  170.1, 167.4, 147.7, 140.6, 138.5, 135.5, 134.3, 132.5, 130.6, 129.6, 129.6, 128.7, 128.5, 127.8, 127.7, 127.5, 126.3, 124.0, 121.3, 117.0, 68.2, 60.1, 53.2, 41.7, 21.4.

IR (neat):  $\nu(\text{cm}^{-1})$  3387, 3033, 1652, 1496.

HRMS (ESI-TOF) calcd for  $\text{C}_{31}\text{H}_{30}\text{N}_3\text{O}_2^+$  ( $[\text{M}+\text{H}^+$ ) = 476.2333, found 476.2330.

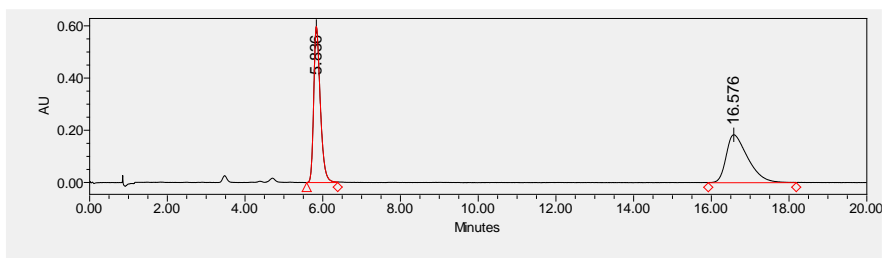

|   | Retention Time | Area    | % Area |
|---|----------------|---------|--------|
| 1 | 5.836          | 7025064 | 49.68  |
| 2 | 16.576         | 7116983 | 50.32  |

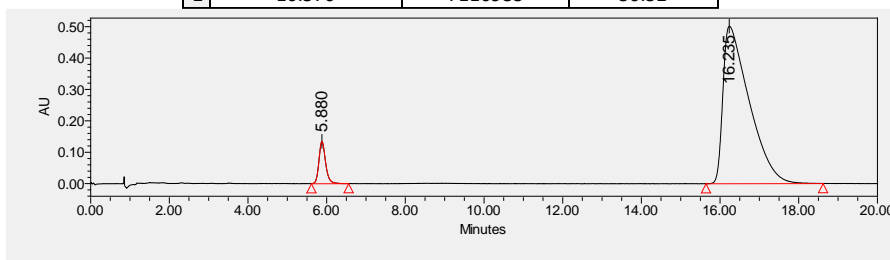

|   | Retention Time | Area     | % Area |
|---|----------------|----------|--------|
| 1 | 5.880          | 1591790  | 6.41   |
| 2 | 16.235         | 23236653 | 93.59  |

**(S)-N-(5-benzyl-4-oxo-1,3-diphenylhexahydropyrimidin-5-yl)-3,5-dimethylbenzamide (3ag)**

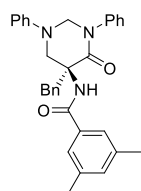

32.3 mg, 66% yield; white solid, melting point: 68.1-72.9 °C,  $[\alpha]_D^{27} = -53.9$  ( $c = 0.08$ ,  $\text{CH}_2\text{Cl}_2$ ).

Dissolved in MeOH for SFC; SFC (Daicel chiralcel OX-3,  $\text{CO}_2/\text{EtOH} = 80/20$ , flow rate = 1.5 mL/min,  $\lambda = 254$  nm) retention time:  $t_{\text{minor}} = 5.08$  min,  $t_{\text{major}} = 8.97$  min. er = 95:5.

$^1\text{H NMR}$  (400 MHz, Chloroform- $d$ )  $\delta$  7.48 – 7.38 (m, 2H), 7.37 – 7.26 (m, 7H), 7.25 – 7.22 (m, 3H), 7.22 – 7.13 (m, 2H), 7.11 – 7.06 (m, 1H), 7.03 – 6.89 (m, 4H), 5.03 (d,  $J = 10.6$  Hz, 1H), 4.88 (dd,  $J = 10.6, 1.5$  Hz, 1H), 4.47 (dd,  $J = 13.5, 1.6$  Hz, 1H), 4.10 (d,  $J = 13.4$  Hz, 1H), 3.51 (dd,  $J = 20.5, 13.6$  Hz, 2H), 2.29 (s, 6H).

$^{13}\text{C NMR}$  (101 MHz,  $\text{CDCl}_3$ )  $\delta$  170.1, 167.5, 147.7, 140.5, 138.3, 135.6, 134.3, 133.3, 130.6, 129.6, 129.5, 128.6, 127.6, 127.4, 126.3, 124.8, 121.2, 116.9, 68.2, 60.1, 53.2, 41.7, 21.3, 21.3.

IR (neat):  $\nu(\text{cm}^{-1})$  3330, 2923, 2859, 1656, 1599, 1497.

HRMS (ESI-TOF) calcd for  $\text{C}_{32}\text{H}_{32}\text{N}_3\text{O}_2^+$  ( $[\text{M}+\text{H}^+]$ ) = 490.2489, found 490.2482.

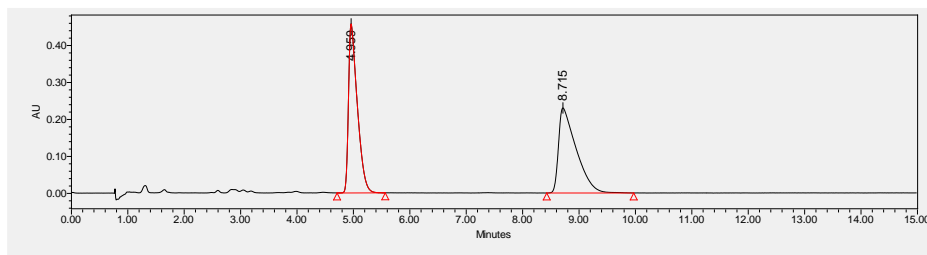

|   | Retention Time | Area    | % Area |
|---|----------------|---------|--------|
| 1 | 4.959          | 4961644 | 49.79  |
| 2 | 8.715          | 5004022 | 50.21  |

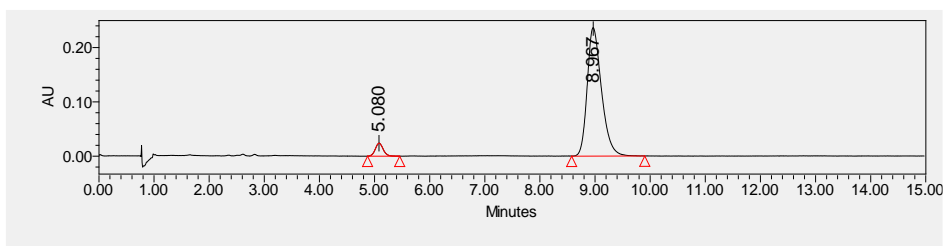

|   | Retention Time | Area    | % Area |
|---|----------------|---------|--------|
| 1 | 5.080          | 239816  | 5.33   |
| 2 | 8.967          | 4256797 | 94.67  |

**(S)-N-(5-benzyl-4-oxo-1,3-diphenylhexahydropyrimidin-5-yl)adamantane-1-carboxamide (3ah)**

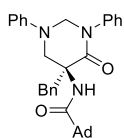

38.0 mg, 73% yield; white solid, melting point: 69.0-76.0 °C,  $[\alpha]_{25}^{20} = -44.2$  (c = 0.43, CH<sub>2</sub>Cl<sub>2</sub>).

Dissolved in MeOH for SFC; SFC (Daicel chiralcel OX-3, CO<sub>2</sub>/EtOH = 80/20, flow rate = 1.5 mL/min,  $\lambda = 254$  nm) retention time:  $t_{\text{minor}} = 5.33$  min,  $t_{\text{major}} = 8.58$  min. er = 93:7.

<sup>1</sup>H NMR (400 MHz, Chloroform-*d*)  $\delta$  7.51 – 7.39 (m, 2H), 7.37 – 7.26 (m, 8H), 7.23 – 7.09 (m, 2H), 7.04 – 6.89 (m, 3H), 6.45 (s, 1H), 5.03 (d,  $J = 10.5$  Hz, 1H), 4.87 (dd,  $J = 10.5, 1.6$  Hz, 1H), 4.33 (dd,  $J = 13.4, 1.7$  Hz, 1H), 3.93 (d,  $J = 13.4$  Hz, 1H), 3.37 (s, 2H), 2.01 (s, 1H), 1.84 – 1.59 (m, 14H).

Ad = adamantan-1-yl

<sup>13</sup>C NMR (101 MHz, CDCl<sub>3</sub>)  $\delta$  177.9, 170.4, 147.8, 140.7, 135.5, 130.7, 129.6, 129.5, 128.6, 127.5, 127.4, 126.2, 121.1, 117.0, 68.1, 59.1, 53.2, 41.6, 41.0, 39.1, 36.5, 28.2.

IR (neat):  $\nu$  (cm<sup>-1</sup>) 3400, 2906, 2851, 1655, 1495.

HRMS (ESI-TOF) calcd for C<sub>34</sub>H<sub>38</sub>N<sub>3</sub>O<sub>2</sub><sup>+</sup> ([M]+H<sup>+</sup>) = 520.2959, found 520.2949.

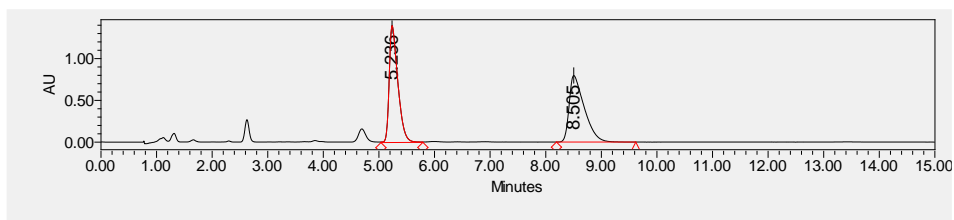

|   | Retention Time | Area     | % Area |
|---|----------------|----------|--------|
| 1 | 5.236          | 15090400 | 50.14  |
| 2 | 8.505          | 15008171 | 49.86  |

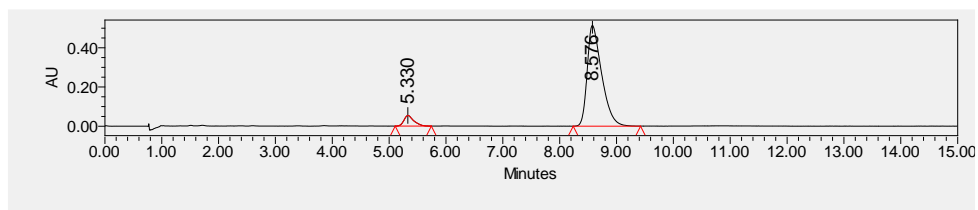

|   | Retention Time | Area    | % Area |
|---|----------------|---------|--------|
| 1 | 5.330          | 653564  | 6.72   |
| 2 | 8.576          | 9070412 | 93.28  |

**(S)-N-(5-benzyl-4-oxo-1,3-diphenylhexahydropyrimidin-5-yl)-1-naphthamide (3ai)**

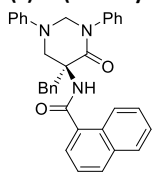

33.8 mg, 66% yield; white solid, melting point: 71.3-78.3 °C,  $[\alpha]_{D}^{27} = -51.1$  ( $c = 0.54$ ,  $\text{CH}_2\text{Cl}_2$ ).

Dissolved in MeOH for SFC; SFC (Daicel chiralcel OX-3,  $\text{CO}_2/\text{EtOH} = 80/20$ , flow rate = 1.5 mL/min,  $\lambda = 254$  nm) retention time:

$t_{\text{minor}} = 9.92$  min,  $t_{\text{major}} = 16.30$  min. er = 94:6.

**$^1\text{H NMR}$**  (400 MHz, Chloroform- $d$ )  $\delta$  8.41 – 8.26 (m, 1H), 7.91 – 7.81 (m, 2H), 7.54 – 7.41 (m, 5H), 7.42 – 7.29 (m, 6H), 7.30 – 7.26 (m, 2H), 7.25 – 7.16 (m, 3H), 7.12 – 7.03 (m, 2H), 6.98 (t,  $J = 7.3$  Hz, 1H), 6.75 (s, 1H), 5.09 (d,  $J = 10.7$  Hz, 1H), 4.89 (d,  $J = 10.7$  Hz, 1H), 4.41 (s, 2H), 3.54 (s, 2H).

**$^{13}\text{C NMR}$**  (101 MHz,  $\text{CDCl}_3$ )  $\delta$  170.1, 169.5, 147.8, 140.6, 135.3, 133.8, 133.7, 131.0, 130.7, 130.2, 129.7, 129.6, 128.7, 128.3, 127.7, 127.5, 127.3, 126.5, 126.4, 125.5, 125.4, 124.7, 121.4, 117.2, 68.3, 60.6, 53.0, 42.0.

**IR** (neat):  $\nu(\text{cm}^{-1})$  3385, 3299, 3056, 1651, 1491.

**HRMS** (ESI-TOF) calcd for  $\text{C}_{34}\text{H}_{30}\text{N}_3\text{O}_2^+$  ( $[\text{M}+\text{H}^+]$ ) = 512.2333, found 512.2325.

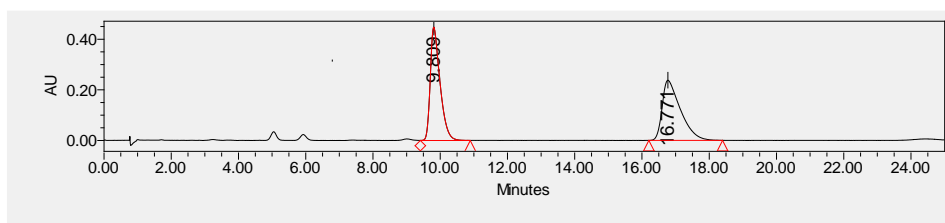

|   | Retention Time | Area    | % Area |
|---|----------------|---------|--------|
| 1 | 9.809          | 8943175 | 50.01  |
| 2 | 16.771         | 8938845 | 49.99  |

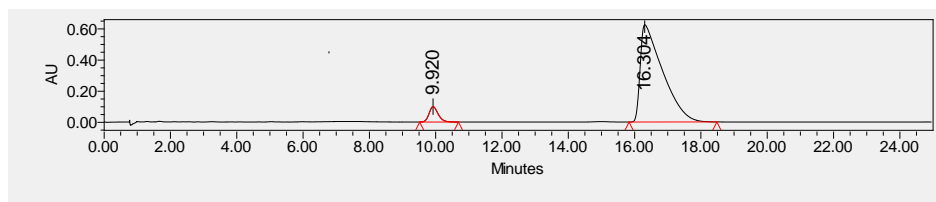

|   | Retention Time | Area     | % Area |
|---|----------------|----------|--------|
| 1 | 9.920          | 1894526  | 6.09   |
| 2 | 16.304         | 29237953 | 93.91  |

**(S)-N-(5-benzyl-4-oxo-1,3-diphenylhexahydropyrimidin-5-yl)thiophene-2-carboxamide (3aj)**

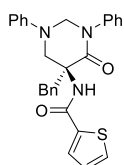

24.8 mg, 53% yield; white solid, melting point: 67.6-74.1 °C,  $[\alpha]_D^{27} = -40.5$  ( $c = 0.42$ ,  $\text{CH}_2\text{Cl}_2$ ).

Dissolved in MeOH for SFC; SFC (Daicel chiralcel OX-3,  $\text{CO}_2/\text{EtOH} = 80/20$ , flow rate = 1.5 mL/min,  $\lambda = 254$  nm) retention time:

$t_{\text{minor}} = 7.28$  min,  $t_{\text{major}} = 20.50$  min. er = 90:10.

$^1\text{H NMR}$  (400 MHz, Chloroform- $d$ )  $\delta$  7.52 – 7.41 (m, 3H), 7.40 – 7.29 (m, 8H), 7.24 – 7.12 (m, 2H), 7.07 – 7.00 (m, 3H), 6.96 (t,  $J = 7.4$  Hz, 1H), 6.86 (s, 1H), 5.06 (d,  $J = 10.5$  Hz, 1H), 4.91 (dd,  $J = 10.5, 1.7$  Hz, 1H), 4.44 (dd,  $J = 13.4, 1.8$  Hz, 1H), 4.05 (d,  $J = 13.4$  Hz, 1H), 3.49 (q,  $J = 13.6$  Hz, 2H).

$^{13}\text{C NMR}$  (101 MHz,  $\text{CDCl}_3$ )  $\delta$  169.9, 161.6, 147.7, 140.5, 138.9, 135.3, 130.6, 130.5, 129.6, 129.6, 128.7, 128.4, 127.7, 127.7, 127.5, 126.4, 121.4, 117.1, 68.4, 60.0, 53.2, 41.7.

IR (neat):  $\nu(\text{cm}^{-1})$  3324, 3062, 3032, 1645, 1494.

HRMS (ESI-TOF) calcd for  $\text{C}_{28}\text{H}_{26}\text{N}_3\text{O}_2\text{S}^+$  ( $[\text{M}] + \text{H}^+$ ) = 468.1740, found 468.1734.

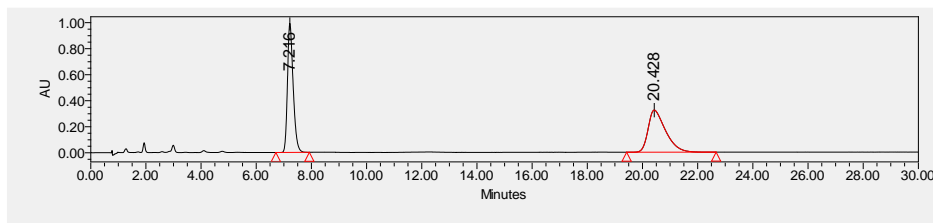

|   | Retention Time | Area     | % Area |
|---|----------------|----------|--------|
| 1 | 7.216          | 14188270 | 50.07  |
| 2 | 20.428         | 14149765 | 49.93  |

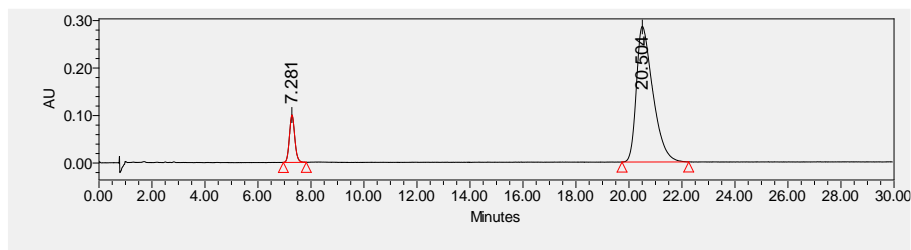

|   | Retention Time | Area     | % Area |
|---|----------------|----------|--------|
| 1 | 7.281          | 1396948  | 10.18  |
| 2 | 20.504         | 12321657 | 89.82  |

**(S)-N-(5-(4-fluorobenzyl)-4-oxo-1,3-diphenylhexahydropyrimidin-5-yl)-4-methylbenzamide(3ak)**

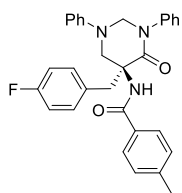

29.6 mg, 60% yield; white solid, melting point: 71.1-73.7 °C,  $[\alpha]^{26}_D = -50.0$  ( $c = 0.38$ ,  $\text{CH}_2\text{Cl}_2$ ).

Dissolved in MeOH for SFC; SFC (Daicel chiralcel OX-3,  $\text{CO}_2/\text{EtOH} = 80/20$ , flow rate = 1.5 mL/min,  $\lambda = 254$  nm) retention time:  $t_{\text{minor}} = 5.24$  min,  $t_{\text{major}} = 12.87$  min. er = 93:7.

**$^1\text{H}$  NMR** (400 MHz, Chloroform- $d$ )  $\delta$  7.62 – 7.53 (m, 2H), 7.51 – 7.43 (m, 2H), 7.41 – 7.28 (m, 5H), 7.25 – 7.09 (m, 4H), 7.07 – 6.89 (m, 6H), 5.04 (d,  $J = 10.5$  Hz, 1H), 4.95 (dd,  $J = 10.5, 1.5$  Hz, 1H), 4.61 (dd,  $J = 13.4, 1.6$  Hz, 1H), 4.09 (d,  $J = 13.4$  Hz, 1H), 3.59 (d,  $J = 13.8$  Hz, 1H), 3.46 (d,  $J = 13.7$  Hz, 1H), 2.39 (s, 3H).

**$^{13}\text{C}$  NMR** (101 MHz, Chloroform- $d$ )  $\delta$  170.0, 167.3, 163.4, 160.9, 147.5, 142.3, 140.4, 132.0 (d,  $J_{\text{C-F}} = 8.0$  Hz), 131.5, 131.3 (d,  $J_{\text{C-F}} = 3.3$  Hz), 129.6, 129.3, 127.8, 127.0, 126.3, 121.3, 116.8, 115.3 (d,  $J_{\text{C-F}} = 21.2$  Hz), 68.2, 60.4, 53.6, 40.9, 21.5 (d,  $J_{\text{C-F}} = 2.3$  Hz).

**$^{19}\text{F}$  NMR** (376 MHz,  $\text{CDCl}_3$ )  $\delta$  -115.32.

**IR** (neat):  $\nu(\text{cm}^{-1})$  3330, 3037, 2923, 1648, 1496.

**HRMS** (ESI-TOF) calcd for  $\text{C}_{31}\text{H}_{29}\text{N}_3\text{O}_2\text{F}^+$  ( $[\text{M}] + \text{H}^+$ ) = 494.2238, found 494.2232.

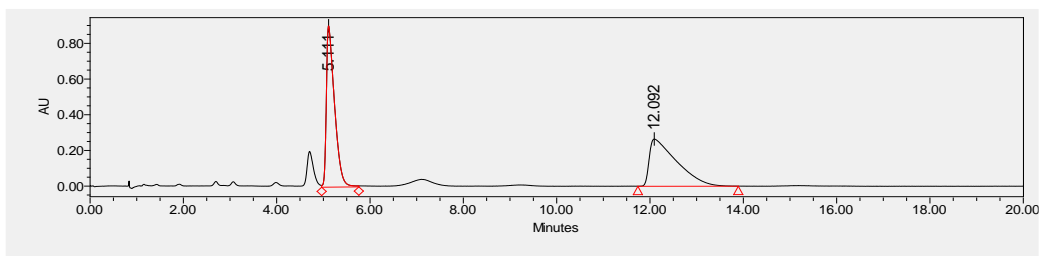

|   | Retention Time | Area     | % Area |
|---|----------------|----------|--------|
| 1 | 5.111          | 10946264 | 50.43  |
| 2 | 12.092         | 10761127 | 49.57  |

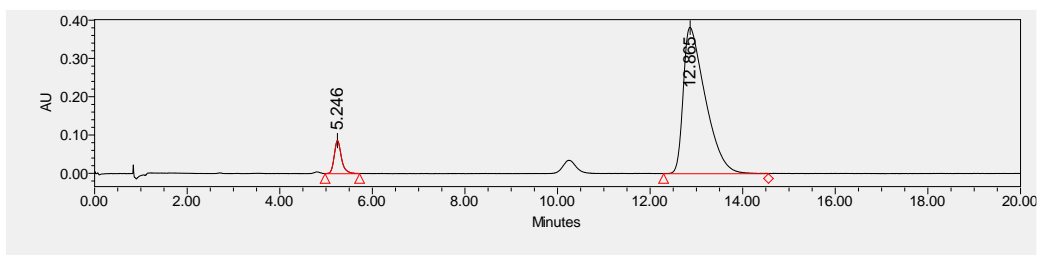

|   | Retention Time | Area     | % Area |
|---|----------------|----------|--------|
| 1 | 5.246          | 943050   | 6.95   |
| 2 | 12.865         | 12635540 | 93.05  |

**(S)-N-(5-(4-chlorobenzyl)-4-oxo-1,3-diphenylhexahydropyrimidin-5-yl)-4-methylbenzamide(3a)**

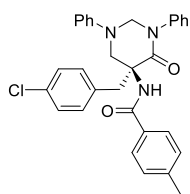

29.6 mg, 58% yield; white solid, melting point: 81.3-85.4 °C,  $[\alpha]_D^{27} = -48.4$  ( $c = 0.55$ ,  $\text{CH}_2\text{Cl}_2$ ).

Dissolved in MeOH for SFC; SFC (Daicel chiralcel OX-3,  $\text{CO}_2/\text{EtOH} = 80/20$ , flow rate = 1.5 mL/min,  $\lambda = 254$  nm) retention time:  $t_{\text{minor}} = 7.52$  min,  $t_{\text{major}} = 16.66$  min. er = 90:10.

$^1\text{H NMR}$  (400 MHz,  $\text{CHCl}_3$ )  $\delta$  7.61 – 7.54 (m, 2H), 7.52 – 7.43 (m, 2H), 7.41 – 7.27 (m, 5H), 7.25 – 7.18 (m, 4H), 7.13 – 7.06 (m, 2H), 7.04 – 6.90 (m, 2H), 5.04 (d,  $J = 10.4$  Hz, 1H), 4.96 (dd,  $J = 10.5, 1.5$  Hz, 1H), 4.63 (dd,  $J = 13.5, 1.6$  Hz, 1H), 4.07 (d,  $J = 13.4$  Hz, 1H), 3.61 (d,  $J = 13.6$  Hz, 1H), 3.46 (d,  $J = 13.6$  Hz, 1H), 2.39 (s, 3H).

$^{13}\text{C NMR}$  (101 MHz,  $\text{CDCl}_3$ )  $\delta$  169.8, 167.3, 147.5, 142.4, 140.3, 134.1, 133.2, 131.8, 131.5, 129.6, 129.3, 128.6, 127.8, 127.0, 126.2, 121.3, 116.8, 68.3, 60.4, 53.7, 41.0, 21.6.

IR (neat):  $\nu(\text{cm}^{-1})$  3330, 3035, 2923, 1650, 1493.

HRMS (ESI-TOF) calcd for  $\text{C}_{31}\text{H}_{29}\text{N}_3\text{O}_2\text{Cl}^+$  ( $[\text{M}]^+\text{H}^+$ ) = 510.1943, 511, 512.1913, found 510.1933, 512.1912.

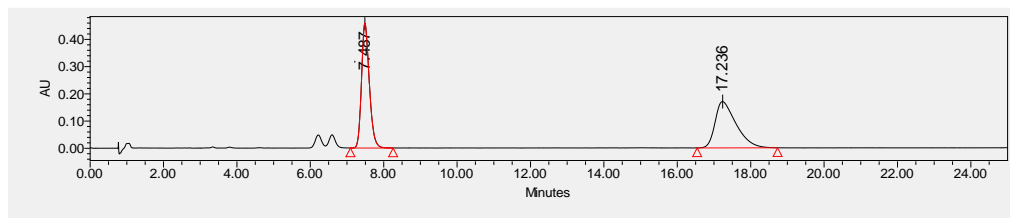

|   | Retention Time | Area    | % Area |
|---|----------------|---------|--------|
| 1 | 7.487          | 6768734 | 50.08  |
| 2 | 17.236         | 6747364 | 49.92  |

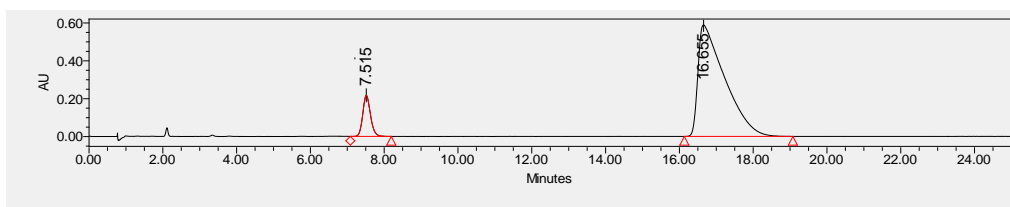

|   | Retention Time | Area     | % Area |
|---|----------------|----------|--------|
| 1 | 7.515          | 3163558  | 9.65   |
| 2 | 16.655         | 29635922 | 90.35  |

**(S)-N-(5-(4-bromobenzyl)-4-oxo-1,3-diphenylhexahydropyrimidin-5-yl)-4-methylbenzamide(3am)**

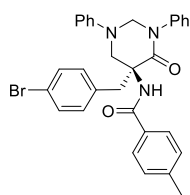

29.4 mg, 53% yield; white solid, melting point: 85.0-89.2 °C,  $[\alpha]^{26}_D = -40.0$  ( $c = 0.57$ ,  $\text{CH}_2\text{Cl}_2$ ).

Dissolved in MeOH for SFC; SFC (Daicel chiralcel OX-3,  $\text{CO}_2/\text{EtOH} = 80/20$ , flow rate = 1.5 mL/min,  $\lambda = 254$  nm) retention time:  $t_{\text{minor}} = 10.52$  min,  $t_{\text{major}} = 24.59$  min. er = 89:11.

$^1\text{H NMR}$  (400 MHz, Chloroform- $d$ )  $\delta$  7.63 – 7.53 (m, 2H), 7.51 – 7.43 (m, 2H), 7.41 – 7.27 (m, 7H), 7.25 – 7.18 (m, 2H), 7.10 – 6.91 (m, 6H), 5.03 (d,  $J = 10.4$  Hz, 1H), 4.96 (dd,  $J = 10.4, 1.6$  Hz, 1H), 4.63 (dd,  $J = 13.5, 1.6$  Hz, 1H), 4.06 (d,  $J = 13.4$  Hz, 1H), 3.60 (d,  $J = 13.6$  Hz, 1H), 3.44 (d,  $J = 13.6$  Hz, 1H), 2.39 (s, 3H).

$^{13}\text{C NMR}$  (101 MHz,  $\text{CDCl}_3$ )  $\delta$  169.8, 167.3, 147.5, 142.4, 140.3, 134.7, 132.2, 131.5, 131.5, 129.6, 129.3, 127.8, 127.0, 126.2, 121.4, 121.3, 116.8, 68.3, 60.4, 53.7, 41.1, 21.6.

IR (neat):  $\nu(\text{cm}^{-1})$  3328, 3035, 2922, 2855, 1649, 1492.

HRMS (ESI-TOF) calcd for  $\text{C}_{31}\text{H}_{29}\text{N}_3\text{O}_2\text{Br}^+$  ( $[\text{M}] + \text{H}^+$ ) = 554.1438, 556.1417, found 554.1428, 556.1407.

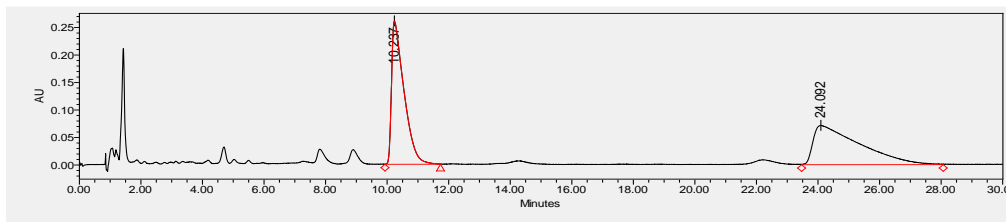

|   | Retention Time | Area    | % Area |
|---|----------------|---------|--------|
| 1 | 10.237         | 7262825 | 49.19  |
| 2 | 24.092         | 7501355 | 50.81  |

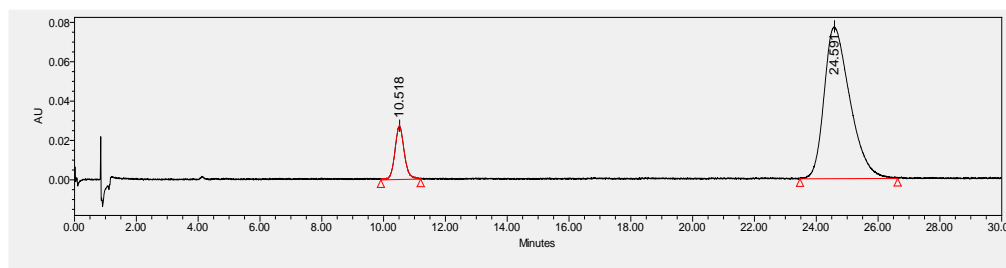

|   | Retention Time | Area    | % Area |
|---|----------------|---------|--------|
| 1 | 10.518         | 574070  | 11.39  |
| 2 | 24.591         | 4467462 | 88.61  |



**(S)-4-methyl-N-(5-(4-methylbenzyl)-4-oxo-1,3-diphenylhexahydropyrimidin-5-yl)benzamide(3an)**

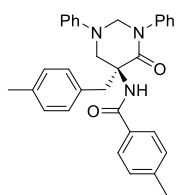

37.8 mg, 71% yield; white solid, melting point: 68.2-73.6 °C,  $[\alpha]_{27}^{20} = -46.7$  ( $c = 0.55$ ,  $\text{CH}_2\text{Cl}_2$ ).

Dissolved in MeOH for SFC; SFC (Daicel chiralcel OX-3,  $\text{CO}_2/\text{EtOH} = 80/20$ , flow rate = 1.5 mL/min,  $\lambda = 254$  nm) retention time:  $t_{\text{minor}} = 6.88$  min,  $t_{\text{major}} = 12.80$  min. er = 94:6.

$^1\text{H NMR}$  (400 MHz, Chloroform- $d$ )  $\delta$  7.62 – 7.54 (m, 2H), 7.50 – 7.42 (m, 2H), 7.41 – 7.27 (m, 4H), 7.24 – 7.17 (m, 2H), 7.16 – 7.07 (m, 4H), 7.08 – 7.01 (m, 2H), 6.99 – 6.92 (m, 2H), 5.10 (d,  $J = 10.6$  Hz, 1H), 4.95 (dd,  $J = 10.6, 1.6$  Hz, 1H), 4.43 (dd,  $J = 13.4, 1.7$  Hz, 1H), 4.07 (d,  $J = 13.3$  Hz, 1H), 3.48 (dd,  $J = 30.0, 13.7$  Hz, 2H), 2.39 (s, 3H), 2.34 (s, 3H).

$^{13}\text{C NMR}$  (101 MHz,  $\text{CDCl}_3$ )  $\delta$  170.3, 167.0, 147.8, 142.2, 140.7, 137.1, 132.3, 131.5, 130.4, 129.6, 129.5, 129.4, 129.3, 127.6, 127.0, 126.4, 121.2, 117.1, 68.3, 59.9, 53.1, 41.1, 21.5, 21.2.

IR (neat):  $\nu(\text{cm}^{-1})$  3389, 3031, 2922, 1651, 1490.

HRMS (ESI-TOF) calcd for  $\text{C}_{32}\text{H}_{32}\text{N}_3\text{O}_2^+$  ( $[\text{M}+\text{H}^+]$ ) = 490.2489, found 490.2480.

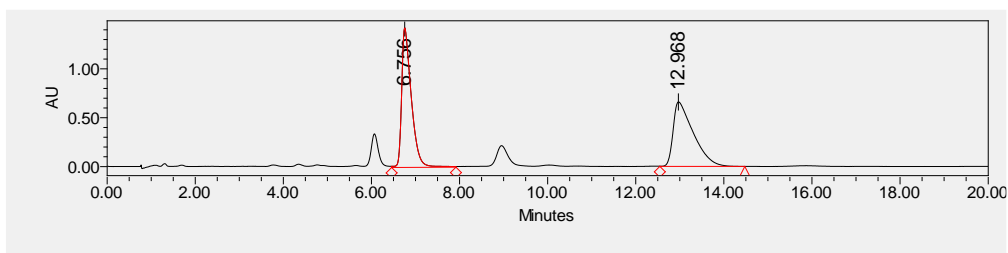

|   | Retention Time | Area     | % Area |
|---|----------------|----------|--------|
| 1 | 6.756          | 21630002 | 50.77  |
| 2 | 12.968         | 20975753 | 49.23  |

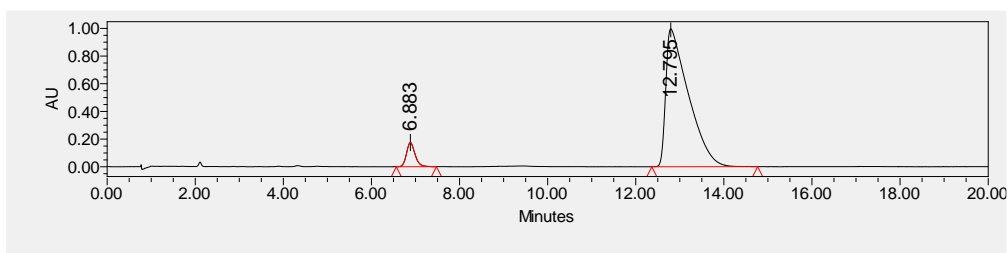

|   | Retention Time | Area     | % Area |
|---|----------------|----------|--------|
| 1 | 6.883          | 2344167  | 6.20   |
| 2 | 12.795         | 35448342 | 93.80  |

**(S)-4-methyl-N-(5-(2-methylbenzyl)-4-oxo-1,3-diphenylhexahydropyrimidin-5-yl)benzamide(3ao)**

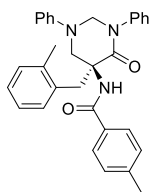

25.5mg, 52% yield; white solid, melting point: 66.8-72.0 °C,  $[\alpha]_D^{27} = -50.5$  (c = 0.44, CH<sub>2</sub>Cl<sub>2</sub>).

Dissolved in MeOH for SFC; SFC (Daicel chiralcel OX-3, CO<sub>2</sub>/EtOH = 80/20, flow rate = 1.5 mL/min,  $\lambda = 254$  nm) retention time:  $t_{\text{minor}} = 7.00$  min,  $t_{\text{major}} = 10.14$  min. er = 97:3.

<sup>1</sup>H NMR (400 MHz, Chloroform-d)  $\delta$  7.59 – 7.51 (m, 2H), 7.50 – 7.42 (m, 2H), 7.42 – 7.27 (m, 5H), 7.23 – 7.09 (m, 6H), 7.08 – 7.00 (m, 2H), 6.98 – 6.89 (m, 2H), 5.01 (d,  $J = 10.4$  Hz, 1H), 4.91 (dd,  $J = 10.4, 1.6$  Hz, 1H), 4.48 (dd,  $J = 13.4, 1.6$  Hz, 1H), 4.15 (d,  $J = 13.4$  Hz, 1H), 3.68 (d,  $J = 14.0$  Hz, 1H), 3.49 (d,  $J = 14.1$  Hz, 1H), 2.37 (d, 6H).

<sup>13</sup>C NMR (101 MHz, CDCl<sub>3</sub>)  $\delta$  170.3, 167.1, 147.8, 142.2, 140.5, 137.8, 134.1, 131.5, 131.1, 130.9, 129.6, 129.5, 129.3, 127.7, 127.5, 127.0, 126.4, 126.1, 121.4, 117.1, 68.5, 60.4, 53.6, 38.1, 21.5, 20.1.

IR (neat):  $\nu$ (cm<sup>-1</sup>) 3395, 3031, 2922, 1650, 1488.

HRMS (ESI-TOF) calcd for C<sub>32</sub>H<sub>32</sub>N<sub>3</sub>O<sub>2</sub><sup>+</sup> ([M]+H<sup>+</sup>) = 490.2489, found 490.2479.

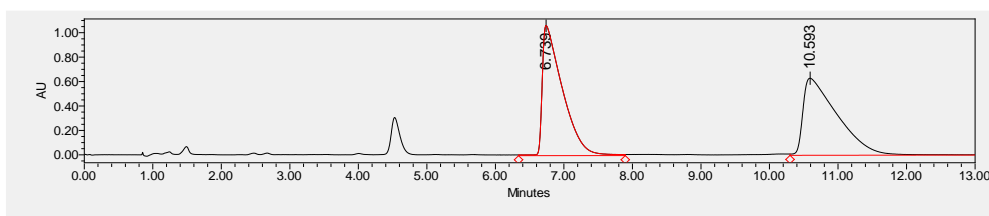

|   | Retention Time | Area     | % Area |
|---|----------------|----------|--------|
| 1 | 6.739          | 21778355 | 49.73  |
| 2 | 10.593         | 22011822 | 50.27  |

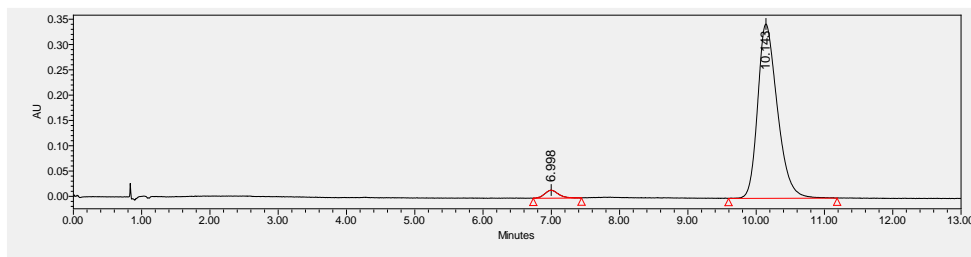

|   | Retention Time | Area    | % Area |
|---|----------------|---------|--------|
| 1 | 6.998          | 223165  | 3.14   |
| 2 | 10.143         | 6892722 | 96.86  |

**(S)-4-methyl-N-(5-(naphthalen-1-ylmethyl)-4-oxo-1,3-diphenylhexahydropyrimidin-5-yl)benzamide(3ap)**

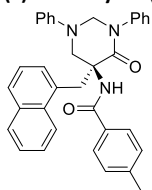

27.4 mg, 52% yield; white solid, melting point: 77.5-84.5 °C,  $[\alpha]_D^{25} = -51.1$  ( $c = 0.56$ ,  $\text{CH}_2\text{Cl}_2$ ).

Dissolved in MeOH for SFC; SFC (Daicel chiralcel OX-3,  $\text{CO}_2/\text{EtOH} = 80/20$ , flow rate = 1.5 mL/min,  $\lambda = 254$  nm) retention time:  $t_{\text{minor}} = 12.59$  min,  $t_{\text{major}} = 15.67$  min. er = 97:3.

$^1\text{H NMR}$  (400 MHz, Chloroform- $d$ )  $\delta$  8.38 (d,  $J = 8.4$  Hz, 1H), 7.90 (dd,  $J = 8.2, 1.4$  Hz, 1H), 7.83 (d,  $J = 8.0$  Hz, 1H), 7.98 – 7.73 (m, 2H), 7.56 – 7.28 (m, 13H), 7.15 – 7.03 (m, 4H), 7.04 – 6.94 (m, 1H), 6.86 (s, 1H), 5.10 (d,  $J = 10.4$  Hz, 1H), 4.94 (dd,  $J = 10.4, 1.8$  Hz, 1H), 4.32 (dd,  $J = 13.2, 1.9$  Hz, 1H), 4.18 (d,  $J = 14.1$  Hz, 1H), 4.02 (d,  $J = 13.1$  Hz, 1H), 3.82 (d,  $J = 14.1$  Hz, 1H), 2.34 (s, 3H).

$^{13}\text{C NMR}$  (101 MHz,  $\text{CDCl}_3$ )  $\delta$  170.6, 166.9, 147.9, 142.1, 140.6, 134.1, 133.2, 131.8, 131.1, 129.6, 129.4, 129.2, 129.1, 128.4, 127.5, 127.0, 126.9, 126.5, 126.0, 125.5, 124.3, 121.7, 117.7, 69.0, 60.3, 52.9, 37.3, 21..

IR (neat):  $\nu(\text{cm}^{-1})$  3434, 2922, 1655, 1491.

HRMS (ESI-TOF) calcd for  $\text{C}_{35}\text{H}_{32}\text{N}_3\text{O}_2^+$  ( $[\text{M}+\text{H}^+]$ ) = 526.2489, found 526.2483.

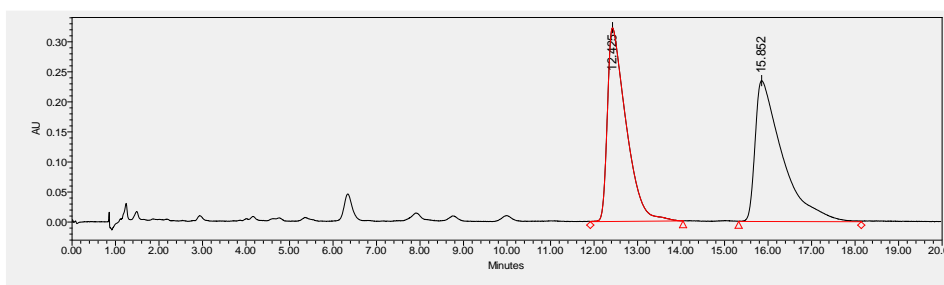

|   | Retention Time | Area     | % Area |
|---|----------------|----------|--------|
| 1 | 12.425         | 9592780  | 48.50  |
| 2 | 15.852         | 10185389 | 51.50  |

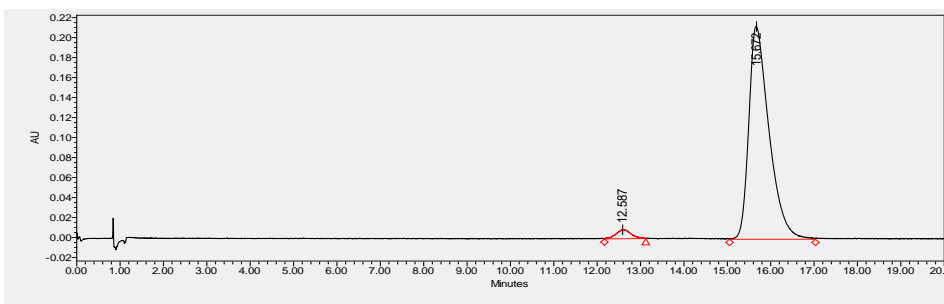

|   | Retention Time | Area    | % Area |
|---|----------------|---------|--------|
| 1 | 12.587         | 218607  | 3.07   |
| 2 | 15.672         | 6892713 | 96.93  |

**(S)-4-methyl-N-(4-oxo-5-phenethyl-1,3-diphenylhexahydropyrimidin-5-yl)benzamide(3aq)**

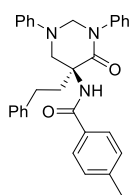

31.9 mg, 65% yield; white solid, melting point: 80.3-85.7 °C,  $[\alpha]_D^{27} = -52.4$  ( $c = 0.54$ ,  $\text{CH}_2\text{Cl}_2$ ).

Dissolved in MeOH for SFC; SFC (Daicel chiralcel OX-3,  $\text{CO}_2/\text{EtOH} = 80/20$ , flow rate = 1.5 mL/min,  $\lambda = 254$  nm) retention time:

$t_{\text{minor}} = 6.30$  min,  $t_{\text{major}} = 7.64$  min. er = 93:7.

$^1\text{H NMR}$  (400 MHz,  $\text{DMSO}-d_6$ )  $\delta$  8.56 (s, 1H), 7.80 (d,  $J = 8.2$  Hz, 2H), 7.50 – 7.37 (m, 4H), 7.36 – 7.25 (m, 5H), 7.24 – 7.07 (m, 5H), 7.02 – 6.94 (m, 2H), 6.90 (t,  $J = 7.3$  Hz, 1H), 5.30 (d,  $J = 11.5$  Hz, 1H), 5.01 (dd,  $J = 11.5, 2.3$  Hz, 1H), 4.25 (dd,  $J = 13.7, 2.4$  Hz, 1H), 4.03 (d,  $J = 13.7$  Hz, 1H), 2.82 (td,  $J = 12.9, 4.6$  Hz, 1H), 2.64 (td,  $J = 12.9, 4.4$  Hz, 1H), 2.37 (s, 3H), 2.13 – 2.00 (m, 1H), 1.85 (td,  $J = 13.5, 4.6$  Hz, 1H).

$^{13}\text{C NMR}$  (101 MHz,  $\text{DMSO}-d_6$ )  $\delta$  171.5, 167.5, 148.6, 142.1, 142.0, 141.8, 131.6, 129.9, 129.4, 129.2, 128.7, 128.6, 128.4, 127.0, 126.7, 126.2, 120.5, 116.8, 66.6, 59.0, 53.6, 29.8, 21.5.

IR (neat):  $\nu(\text{cm}^{-1})$  3298, 3032, 2925, 1645, 1492.

HRMS (ESI-TOF) calcd for  $\text{C}_{32}\text{H}_{32}\text{N}_3\text{O}_2^+$  ( $[\text{M}+\text{H}^+]$ ) = 490.2489, found 490.2481.

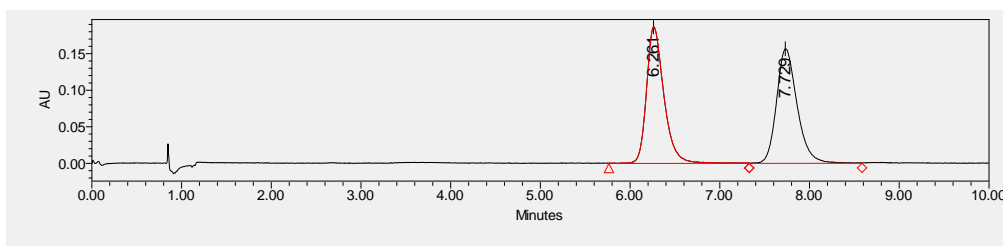

|   | Retention Time | Area    | % Area |
|---|----------------|---------|--------|
| 1 | 6.261          | 2516272 | 50.21  |
| 2 | 7.729          | 2494779 | 49.79  |

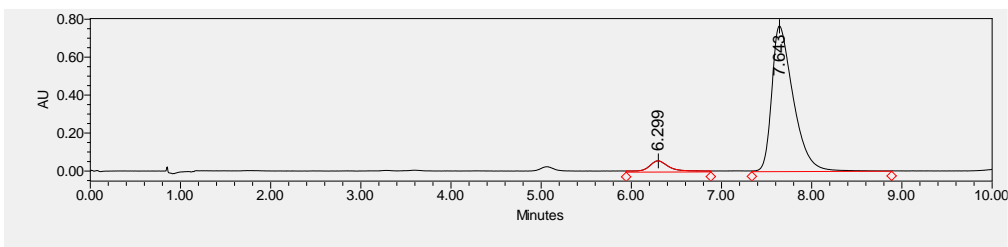

|   | Retention Time | Area     | % Area |
|---|----------------|----------|--------|
| 1 | 6.299          | 1025301  | 7.43   |
| 2 | 7.643          | 12766352 | 92.57  |

**(S)-4-methyl-N-(5-methyl-4-oxo-1,3-diphenylhexahydropyrimidin-5-yl)benzamide(3ar)**

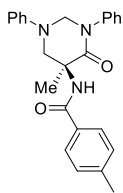

24.8 mg, 62% yield; white solid, melting point: 85.6-88.7 °C,  $[\alpha]^{23}_D = -46.8$  ( $c = 0.53$ ,  $\text{CH}_2\text{Cl}_2$ ).

Dissolved in MeOH for SFC; SFC (Daicel chiralcel IB-3,  $\text{CO}_2/\text{EtOH} = 80/20$ , flow rate = 1.5 mL/min,  $\lambda = 254$  nm) retention time:

$t_{\text{major}} = 5.12$  min,  $t_{\text{minor}} = 6.30$  min. er = 88:12.

$^1\text{H NMR}$  (400 MHz, Chloroform- $d$ )  $\delta$  7.69 (d,  $J = 8.3$  Hz, 2H), 7.51 – 7.38 (m, 4H), 7.37 – 7.27 (m, 3H), 7.21 (d,  $J = 8.0$  Hz, 2H), 7.01 (d, 2H), 6.94 (m, 1H), 6.82 (s, 1H), 5.24 (d,  $J = 10.9$  Hz, 1H), 5.01 (dd,  $J = 10.9, 2.3$  Hz, 1H), 4.30 (dd,  $J = 13.4, 2.4$  Hz, 1H), 4.09 (d,  $J = 13.3$  Hz, 1H), 2.39 (s, 3H), 1.63 (s, 3H).

$^{13}\text{C NMR}$  (101 MHz,  $\text{CDCl}_3$ )  $\delta$  171.7, 167.4, 148.0, 142.3, 140.6, 131.2, 129.6, 129.5, 129.2, 127.5, 127.2, 126.5, 121.0, 116.6, 67.4, 56.7, 56.5, 25.0, 21.5.

IR (neat):  $\nu(\text{cm}^{-1})$  3316, 3035, 2986, 2925, 1644, 1496.

HRMS (ESI-TOF) calcd for  $\text{C}_{25}\text{H}_{26}\text{N}_3\text{O}_2^+$  ( $[\text{M}+\text{H}^+]$ ) = 400.2020, found 400.2016.

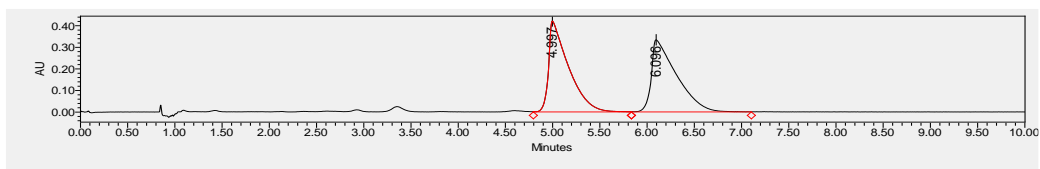

|   | Retention Time | Area    | % Area |
|---|----------------|---------|--------|
| 1 | 4.997          | 6172509 | 49.93  |
| 2 | 6.096          | 6190805 | 50.07  |

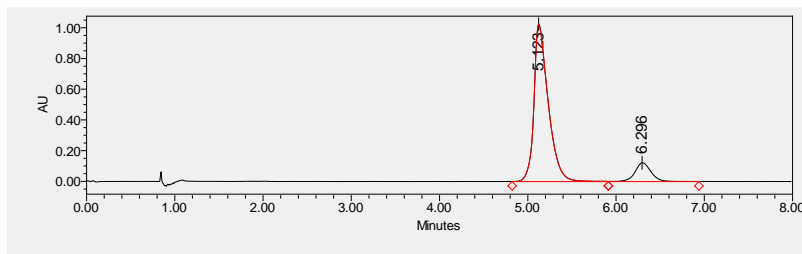

|   | Retention Time | Area     | % Area |
|---|----------------|----------|--------|
| 1 | 5.123          | 11534460 | 87.93  |
| 2 | 6.296          | 1583777  | 12.07  |

**(S)-4-methyl-N-(5-(2-(methylthio)ethyl)-4-oxo-1,3-diphenylhexahydropyrimidin-5-yl)benzamide(3as)**

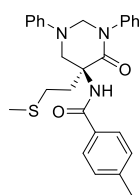

29.4 mg, 64% yield; white solid, melting point: 59.4-63.0 °C,  $[\alpha]_D^{26} = -47.0$  ( $c = 0.53$ ,  $\text{CH}_2\text{Cl}_2$ ).

Dissolved in MeOH for SFC; SFC (Daicel chiralcel OX-3,  $\text{CO}_2/\text{EtOH} = 80/20$ , flow rate = 1.5 mL/min,  $\lambda = 254$  nm) retention time:

$t_{\text{minor}} = 6.38$  min,  $t_{\text{major}} = 7.47$  min. er = 87:13.

$^1\text{H NMR}$  (400 MHz, Chloroform- $d$ )  $\delta$  7.72 (d,  $J = 8.4$  Hz, 3H), 7.52 – 7.27 (m, 7H), 7.23 (d,  $J = 8.0$  Hz, 2H), 7.05 – 6.90 (m, 3H), 5.18 (d,  $J = 10.6$  Hz, 1H), 5.01 (dd,  $J = 10.6, 2.1$  Hz, 1H), 4.44 (dd,  $J = 13.5, 2.1$  Hz, 1H), 4.06 (d,  $J = 13.4$  Hz, 1H), 2.85 – 2.57 (m, 2H), 2.52 – 2.25 (m, 5H), 2.07 (s, 3H).

$^{13}\text{C NMR}$  (101 MHz,  $\text{CDCl}_3$ )  $\delta$  170.5, 167.2, 147.8, 142.3, 140.5, 131.1, 129.7, 129.6, 129.3, 127.7, 127.2, 126.5, 121.2, 116.6, 67.7, 59.6, 54.8, 35.1, 28.7, 21.5, 15.7.

IR (neat):  $\nu(\text{cm}^{-1})$  3327, 3035, 2918, 1647, 1529.

HRMS (ESI-TOF) calcd for  $\text{C}_{27}\text{H}_{30}\text{N}_3\text{O}_2\text{S}^+$  ( $[\text{M}] + \text{H}^+$ ) = 460.2053, found 460.2051.

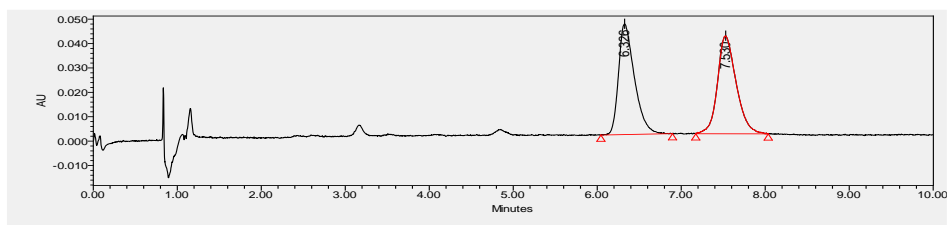

|   | Retention Time | Area   | % Area |
|---|----------------|--------|--------|
| 1 | 6.326          | 597246 | 49.07  |
| 2 | 7.530          | 619807 | 50.93  |

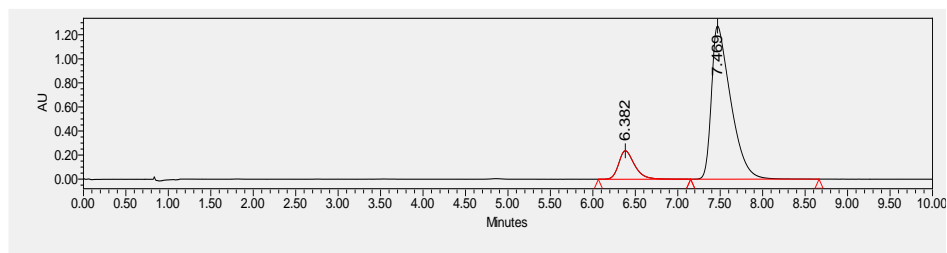

|   | Retention Time | Area     | % Area |
|---|----------------|----------|--------|
| 1 | 6.382          | 3080735  | 13.31  |
| 2 | 7.469          | 20058271 | 86.69  |

**(S)-N-(5-benzyl-1,3-bis(4-fluorophenyl)-4-oxohexahydropyrimidin-5-yl)-4-methylbenzamide(3bd)**

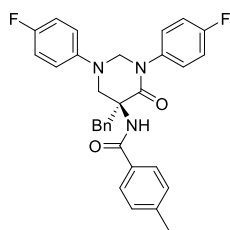

34.8 mg, 68% yield; white solid, melting point: 68.7-71.8 °C,  $[\alpha]^{26}_D = -38.1$  ( $c = 0.67$ ,  $\text{CH}_2\text{Cl}_2$ ).

Dissolved in MeOH for SFC; SFC (Daicel chiralcel OX-3,  $\text{CO}_2/\text{EtOH} = 80/20$ , flow rate = 1.5 mL/min,  $\lambda = 254$  nm) retention time:  $t_{\text{minor}} = 3.39$  min,  $t_{\text{major}} = 6.89$  min. er = 93:7.

$^1\text{H NMR}$  (400 MHz, Chloroform- $d$ )  $\delta$  7.57 (d,  $J = 8.2$  Hz, 2H), 7.40 – 7.28 (m, 5H), 7.23 – 7.09 (m, 6H), 7.07 – 6.94 (m, 4H), 6.87 (s, 1H), 4.98 (d,  $J = 10.3$  Hz, 1H), 4.76 (dd,  $J = 10.2, 1.8$  Hz, 1H), 4.19 (dd,  $J = 13.2, 1.8$  Hz, 1H), 4.02 (d,  $J = 13.1$  Hz, 1H), 3.49 (dd,  $J = 31.2, 13.5$  Hz, 2H), 2.38 (s, 3H).

$^{13}\text{C NMR}$  (101 MHz, Chloroform- $d$ )  $\delta$  170.4, 167.1, 162.9, 160.4, 159.4, 157.0, 144.2 (d,  $J_{\text{C-F}} = 2.6$  Hz), 142.4, 136.5 (d,  $J_{\text{C-F}} = 3.3$  Hz), 135.3, 131.2, 130.6, 129.3, 128.8, 128.3 (d,  $J_{\text{C-F}} = 8.6$  Hz), 127.6, 127.0, 119.5 (d,  $J_{\text{C-F}} = 7.7$  Hz), 116.5, 116.3, 116.1, 69.8, 59.6, 53.8, 41.9, 21.5.

$^{19}\text{F NMR}$  (376 MHz,  $\text{CDCl}_3$ )  $\delta$  -113.79, -121.65.

IR (neat):  $\nu(\text{cm}^{-1})$  3332, 3058, 2925, 1648, 1503.

HRMS (ESI-TOF) calcd for  $\text{C}_{31}\text{H}_{28}\text{N}_3\text{O}_2\text{F}_2^+$  ( $[\text{M}+\text{H}]^+$ ) = 512.2144, found 512.2150.

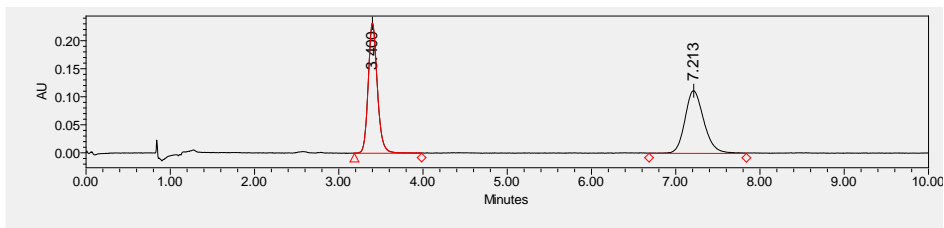

|   | Retention Time | Area    | % Area |
|---|----------------|---------|--------|
| 1 | 3.400          | 1746982 | 49.98  |
| 2 | 7.213          | 1748425 | 50.02  |

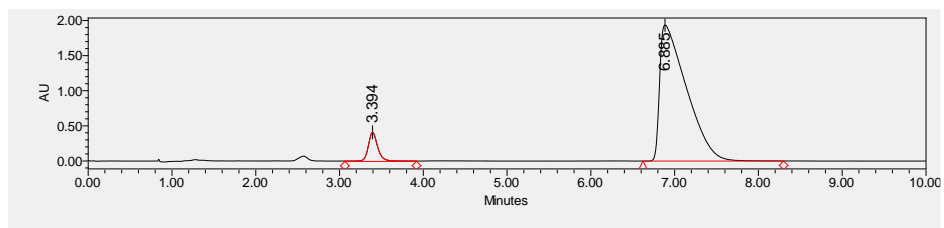

|   | Retention Time | Area     | % Area |
|---|----------------|----------|--------|
| 1 | 3.394          | 3364571  | 7.27   |
| 2 | 6.885          | 42896525 | 92.73  |

**(S)-N-(5-benzyl-1,3-bis(4-bromophenyl)-4-oxohexahydropyrimidin-5-yl)-4-methylbenzamide(3cd)**

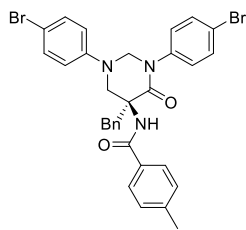

43.7 mg, 69% yield; white solid, melting point: 88.7-93.4 °C,  $[\alpha]_D^{25} = -47.5$  ( $c = 0.68$ ,  $\text{CH}_2\text{Cl}_2$ ).

Dissolved in MeOH for SFC; SFC (Daicel chiralcel OX-3,  $\text{CO}_2/\text{EtOH} = 80/20$ , flow rate = 1.5 mL/min,  $\lambda = 254$  nm) retention time:  $t_{\text{minor}} = 10.11$  min,  $t_{\text{major}} = 27.93$  min. er = 91:9.

$^1\text{H NMR}$  (400 MHz, Chloroform- $d$ )  $\delta$  7.64 – 7.50 (m, 4H), 7.45 – 7.36 (m, 2H), 7.36 – 7.27 (m, 3H), 7.26 – 7.12 (m, 6H), 6.95 – 6.78 (m, 3H), 5.02 (d,  $J = 10.6$  Hz, 1H), 4.80 (dd,  $J = 10.6, 1.7$  Hz, 1H), 4.28 (dd,  $J = 13.5, 1.8$  Hz, 1H), 4.06 (d,  $J = 13.4$  Hz, 1H), 3.44 (dd,  $J = 19.1, 13.6$  Hz, 2H), 2.39 (s, 3H).

$^{13}\text{C NMR}$  (101 MHz,  $\text{CDCl}_3$ )  $\delta$  170.2, 167.2, 146.7, 142.5, 139.5, 135.1, 132.7, 132.5, 131.2, 130.5, 129.3, 128.8, 128.0, 127.7, 127.0, 121.3, 118.8, 113.9, 68.1, 59.7, 53.0, 41.9, 21.6.

IR (neat):  $\nu(\text{cm}^{-1})$  3331, 3031, 2924, 1650, 1487.

HRMS (ESI-TOF) calcd for  $\text{C}_{31}\text{H}_{28}\text{N}_3\text{O}_2\text{Br}_2^+$  ( $[\text{M}+\text{H}]^+$ ) = 632.0543, 634.0522, 636.0502, found 632.0538, 634.0515, 636.0501.

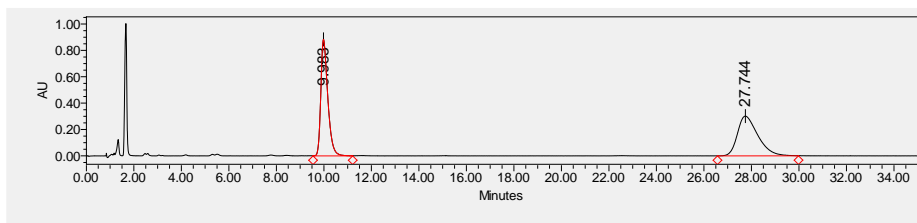

|   | Retention Time | Area     | % Area |
|---|----------------|----------|--------|
| 1 | 9.983          | 17959307 | 49.95  |
| 2 | 27.744         | 17994153 | 50.05  |

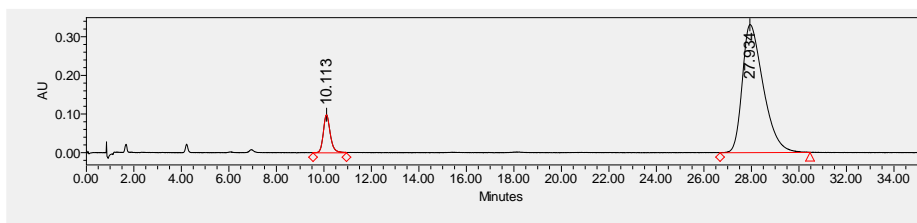

|   | Retention Time | Area     | % Area |
|---|----------------|----------|--------|
| 1 | 10.113         | 2018927  | 9.04   |
| 2 | 27.934         | 20314156 | 90.96  |



**(S)-N-(5-benzyl-4-oxo-1,3-di-p-tolylhexahydropyrimidin-5-yl)-4-methylbenzamide(3dd)**

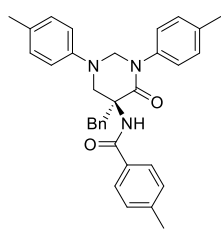

33.8 mg, 67% yield; white solid, melting point: 67.9-72.4 °C,  $[\alpha]_{27}^{20} = -44.7$  ( $c = 0.47$ ,  $\text{CH}_2\text{Cl}_2$ ).

Dissolved in MeOH for SFC; SFC (Daicel chiralcel OX-3,  $\text{CO}_2/\text{EtOH} = 80/20$ , flow rate = 1.5 mL/min,  $\lambda = 254$  nm)

retention time:  $t_{\text{minor}} = 7.34$  min,  $t_{\text{major}} = 15.03$  min. er = 95:5.

$^1\text{H NMR}$  (400 MHz, Chloroform- $d$ )  $\delta$  7.55 (d,  $J = 8.2$  Hz, 2H), 7.33 – 7.14 (m, 11H), 7.10 (d,  $J = 8.2$  Hz, 2H), 6.98 – 6.89 (m, 3H), 4.97 (d,  $J = 10.5$  Hz, 1H), 4.82 (dd,  $J = 10.4, 1.6$  Hz, 1H), 4.39 (dd,  $J = 13.4, 1.6$  Hz, 1H), 4.05 (d,  $J = 13.3$  Hz, 1H), 3.50 (q,  $J = 13.5$  Hz, 2H), 2.37 (s, 6H), 2.28 (s, 3H).

$^{13}\text{C NMR}$  (101 MHz,  $\text{CDCl}_3$ )  $\delta$  170.2, 167.1, 145.5, 142.1, 138.0, 137.5, 135.6, 131.6, 130.8, 130.7, 130.1, 129.2, 128.6, 127.3, 127.0, 126.1, 117.3, 68.9, 60.0, 53.5, 41.7, 21.5, 21.2, 20.6.

IR (neat):  $\nu(\text{cm}^{-1})$  3388, 3029, 2922, 1651, 1515, 1486.

HRMS (ESI-TOF) calcd for  $\text{C}_{33}\text{H}_{34}\text{N}_3\text{O}_2^+$  ( $[\text{M}+\text{H}^+]$ ) = 504.2646, found 504.2638.

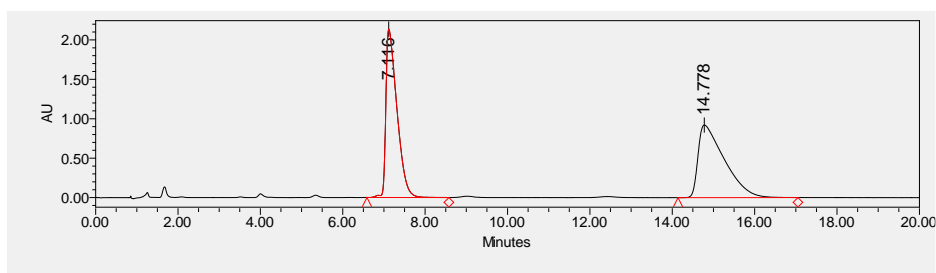

|   | Retention Time | Area     | % Area |
|---|----------------|----------|--------|
| 1 | 7.116          | 39676836 | 49.31  |
| 2 | 14.778         | 40788216 | 50.69  |

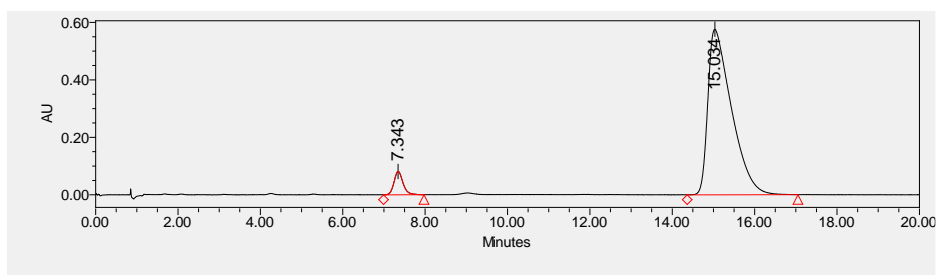

|   | Retention Time | Area     | % Area |
|---|----------------|----------|--------|
| 1 | 7.343          | 1239674  | 5.14   |
| 2 | 15.034         | 22871848 | 94.86  |

**(S)-N-(5-benzyl-4-oxo-1,3-di-m-tolylhexahydropyrimidin-5-yl)-4-methylbenzamide(3ed)**

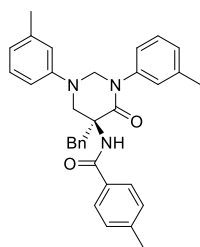

28.7 mg, 57% yield; white solid, melting point: 49.7-54.9 °C,  $[\alpha]^{25}_D = -35.8$  ( $c = 0.61$ ,  $\text{CH}_2\text{Cl}_2$ ).

Dissolved in MeOH for SFC; SFC (Daicel chiralcel OX-3,  $\text{CO}_2/\text{EtOH} = 80/20$ , flow rate = 1.5 mL/min,  $\lambda = 254$  nm) retention time:  $t_{\text{minor}} = 6.88$  min,  $t_{\text{major}} = 23.57$  min. er = 91:9.

$^1\text{H NMR}$  (400 MHz,  $\text{CDCl}_3$ )  $\delta$  7.59 (d,  $J = 8.2$  Hz, 2H), 7.39 – 7.27 (m, 4H), 7.25 – 7.10 (m, 8H), 7.01 (s, 1H), 6.89 – 6.74 (m, 3H), 5.03 (d,  $J = 10.5$  Hz, 1H), 4.90 (dd,  $J = 10.5, 1.5$  Hz, 1H), 4.51 (dd,  $J = 13.3, 1.6$  Hz, 1H), 4.07 (d,  $J = 13.3$  Hz, 1H), 3.53 (q,  $J = 13.6$  Hz, 2H), 2.40 (d, 6H), 2.33 (s, 3H).

$^{13}\text{C NMR}$  (101 MHz,  $\text{CDCl}_3$ )  $\delta$  170.1, 167.1, 147.7, 142.2, 140.5, 139.5, 139.4, 135.6, 131.6, 130.6, 129.4, 129.3, 129.2, 128.6, 128.5, 127.4, 127.0, 127.0, 123.4, 122.0, 117.7, 113.9, 68.3, 60.1, 53.1, 41.6, 21.8, 21.5.

IR (neat):  $\nu(\text{cm}^{-1})$  3416, 3031, 2922, 1815, 1651, 1511.

HRMS (ESI-TOF) calcd for  $\text{C}_{33}\text{H}_{34}\text{N}_3\text{O}_2^+$  ( $[\text{M}+\text{H}^+]$ ) = 504.2646, found 504.2643.

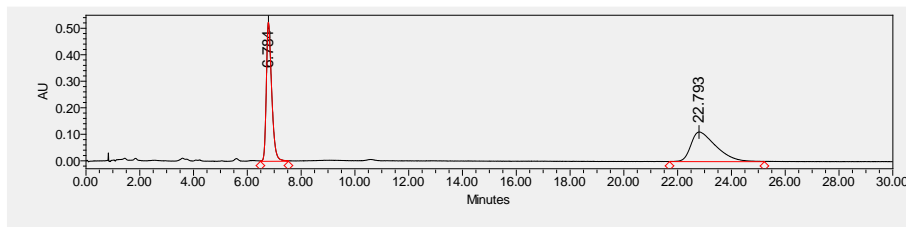

|   | Retention Time | Area    | % Area |
|---|----------------|---------|--------|
| 1 | 6.784          | 7234704 | 49.89  |
| 2 | 22.793         | 7266379 | 50.11  |

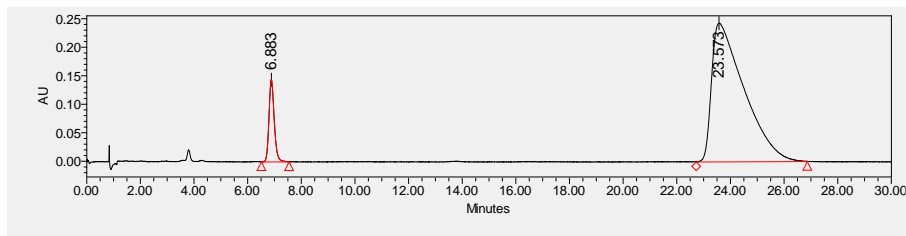

|   | Retention Time | Area     | % Area |
|---|----------------|----------|--------|
| 1 | 6.883          | 1960563  | 8.74   |
| 2 | 23.573         | 20478250 | 91.26  |

**(S)-N-(5-benzyl-1,3-bis(2-chloro-4-methylphenyl)-4-oxohexahydropyrimidin-5-yl)-4-methylbenzamide(3fd)**

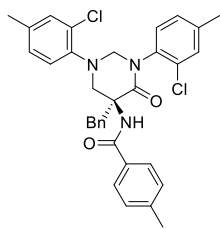

45.8 mg, 80% yield; white solid, melting point: 71.8-75.9 °C,  $[\alpha]_D^{27} = -40.3$  ( $c = 0.67$ ,  $\text{CH}_2\text{Cl}_2$ ).

Dissolved in MeOH for SFC; SFC (Daicel chiralcel OX-3,  $\text{CO}_2/\text{EtOH} = 80/20$ , flow rate = 1.5 mL/min,  $\lambda = 254$  nm) retention time:  $t_{\text{minor}} = 8.09$  min,  $t_{\text{major}} = 17.35$  min. er = 92:8.

$^1\text{H NMR}$  (400 MHz, Chloroform- $d$ )  $\delta$  7.66 – 7.47 (m, 2H), 7.43 – 7.28 (m, 5H), 7.25 – 7.08 (m, 6H), 7.05 – 6.86 (m, 2H), 6.86 – 6.77 (m, 1H), 4.99 (d,  $J = 10.5$  Hz, 1H), 4.79 (dd,  $J = 10.5, 1.7$  Hz, 1H), 4.31 (dd,  $J = 13.4, 1.7$  Hz, 1H), 4.03 (d,  $J = 13.4$  Hz, 1H), 3.46 (dd,  $J = 19.7, 13.6$  Hz, 2H), 2.52 – 2.25 (m, 9H).

$^{13}\text{C NMR}$  (101 MHz,  $\text{CDCl}_3$ )  $\delta$  170.2, 167.1, 146.7, 142.3, 139.1, 135.7, 135.2, 134.9, 131.7, 131.6, 131.3, 130.6, 129.3, 128.8, 127.6, 127.0, 126.9, 124.7, 117.9, 115.6, 68.3, 59.8, 53.1, 41.9, 21.5, 19.8, 19.2.

IR (neat):  $\nu(\text{cm}^{-1})$  3345, 3030, 2923, 2859, 1651, 1494.

HRMS (ESI-TOF) calcd for  $\text{C}_{33}\text{H}_{32}\text{N}_3\text{O}_2\text{Cl}_2^+$  ( $[\text{M}+\text{H}]^+$ ) = 572.1866, 574.1837, 576.1807, found 572.1859, 574.1835, 576.1812.

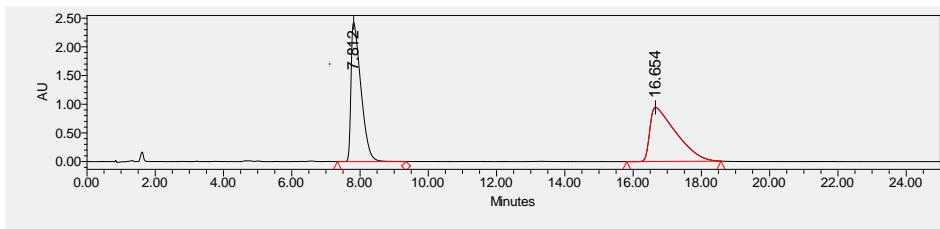

|   | Retention Time | Area     | % Area |
|---|----------------|----------|--------|
| 1 | 7.812          | 48863247 | 49.52  |
| 2 | 16.654         | 49806419 | 50.48  |

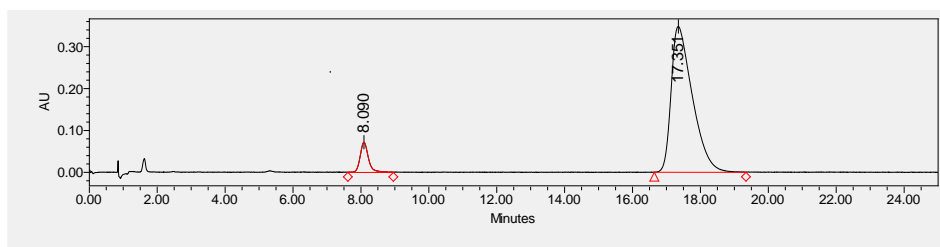

|   | Retention Time | Area     | % Area |
|---|----------------|----------|--------|
| 1 | 8.090          | 1226374  | 7.52   |
| 2 | 17.351         | 15088653 | 92.48  |

**(S)-N-(5-benzyl-1,3-bis(4-(dimethylamino)phenyl)-4-oxohexahydropyrimidin-5-yl)-4-methylbenzamide(3gd)**

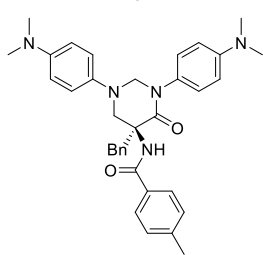

21.4 mg, 38% yield; white solid, melting point: 77.5-81.6 °C,  $[\alpha]_D^{26} = -37.7$  ( $c = 0.42$ ,  $\text{CH}_2\text{Cl}_2$ ).

Dissolved in MeOH for SFC; SFC (Daicel chiralcel OX-3,  $\text{CO}_2/\text{EtOH} = 80/20$ , flow rate = 1.5 mL/min,  $\lambda = 254$  nm)

retention time:  $t_{\text{minor}} = 13.75$  min,  $t_{\text{major}} = 23.58$  min. er = 90:10.

$^1\text{H NMR}$  (400 MHz,  $\text{Chloroform-}d$ )  $\delta$  7.57 (d,  $J = 8.2$  Hz, 2H), 7.34 – 7.26 (m, 3H), 7.25 – 7.14 (m, 6H), 7.03 – 6.96 (m, 3H), 6.79 – 6.70 (m, 4H), 4.85 (d,  $J = 10.2$  Hz, 1H), 4.70 (dd,  $J = 10.2, 1.5$  Hz, 1H), 4.27 (dd,  $J = 13.2, 1.5$  Hz, 1H), 4.01 (d,  $J = 13.1$  Hz, 1H), 3.58 (dd,  $J = 30.2, 13.5$  Hz, 2H), 2.97 (s, 6H), 2.89 (s, 6H), 2.38 (s, 3H).

$^{13}\text{C NMR}$  (101 MHz,  $\text{CDCl}_3$ )  $\delta$  170.2, 167.0, 149.8, 146.5, 142.0, 139.1, 136.0, 131.8, 130.8, 129.6, 129.2, 128.5, 127.2, 127.1, 119.7, 114.3, 113.0, 70.4, 60.1, 54.4, 42.0, 41.4, 40.8, 21.5.

IR (neat):  $\nu(\text{cm}^{-1})$  3385, 2853, 2798, 1650, 1518.

HRMS (ESI-TOF) calcd for  $\text{C}_{35}\text{H}_{40}\text{N}_5\text{O}_2^+$  ( $[\text{M}+\text{H}^+]$ ) = 562.3177, found 562.3173.

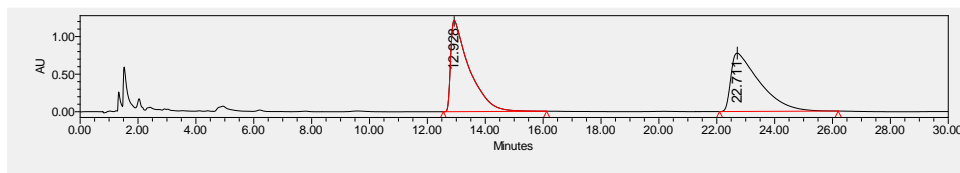

|   | Retention Time | Area     | % Area |
|---|----------------|----------|--------|
| 1 | 12.928         | 53861782 | 50.24  |
| 2 | 22.711         | 53353450 | 49.76  |

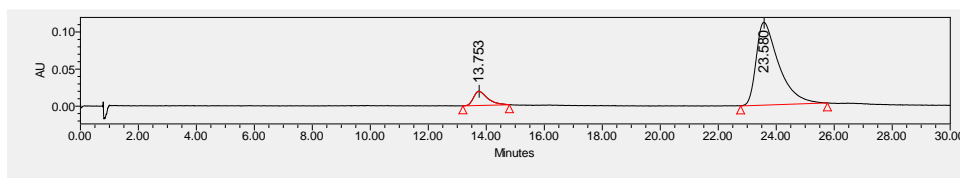

|   | Retention Time | Area    | % Area |
|---|----------------|---------|--------|
| 1 | 13.753         | 650881  | 9.73   |
| 2 | 23.580         | 6037897 | 90.27  |

**(S)-4-methyl-N-(1,3,5-tribenzyl-4-oxohexahydropyrimidin-5-yl)benzamide(3hd)**

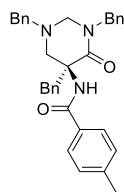

38.8mg, 77% yield; white solid, melting point: 60.5-62.8 °C,  $[\alpha]_D^{26} = -47.5$  ( $c = 0.81$ ,  $\text{CH}_2\text{Cl}_2$ ).

Dissolved in MeOH for SFC; SFC (Daicel chiralcel OX-3,  $\text{CO}_2/\text{EtOH} = 80/20$ , flow rate = 1.5 mL/min,  $\lambda = 254$  nm) retention time:

$t_{\text{major}} = 4.78$  min,  $t_{\text{minor}} = 5.70$  min. er = 90:10.

**$^1\text{H}$  NMR** (400 MHz, Chloroform- $d$ )  $\delta$  7.61 – 7.48 (m, 2H), 7.43 – 7.27 (m, 10H), 7.25 – 7.13 (m, 5H), 6.94 – 6.84 (m, 2H), 6.68 (s, 1H), 4.86 (d,  $J = 15.1$  Hz, 1H), 4.51 (d,  $J = 15.1$  Hz, 1H), 4.01 (dd,  $J = 8.6, 1.8$  Hz, 1H), 3.95 (d,  $J = 8.7$  Hz, 1H), 3.67 (d,  $J = 12.8$  Hz, 1H), 3.57 (d,  $J = 13.3$  Hz, 1H), 3.50 (d,  $J = 12.8$  Hz, 1H), 3.34 (dd,  $J = 11.7, 1.8$  Hz, 1H), 3.30 (d,  $J = 13.4$  Hz, 1H), 3.04 (d,  $J = 11.8$  Hz, 1H), 2.37 (s, 3H).

**$^{13}\text{C}$  NMR** (101 MHz,  $\text{CDCl}_3$ )  $\delta$  170.1, 166.5, 142.1, 136.9, 136.6, 135.6, 131.4, 130.5, 129.5, 129.2, 128.7, 128.7, 128.6, 128.0, 127.7, 127.5, 127.2, 127.0, 68.8, 58.8, 54.8, 48.9, 41., 21.5.

**IR** (neat):  $\nu(\text{cm}^{-1})$  3435, 3030, 2921, 2812, 1647, 1486.

**HRMS** (ESI-TOF) calcd for  $\text{C}_{33}\text{H}_{34}\text{N}_3\text{O}_2^+$  ( $[\text{M}+\text{H}^+]$ ) = 504.2646, found 504.2641.

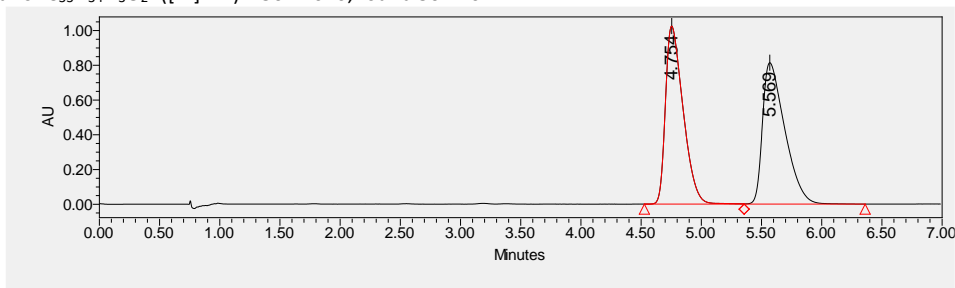

|   | Retention Time | Area     | % Area |
|---|----------------|----------|--------|
| 1 | 4.754          | 10421475 | 49.94  |
| 2 | 5.569          | 10447815 | 50.06  |

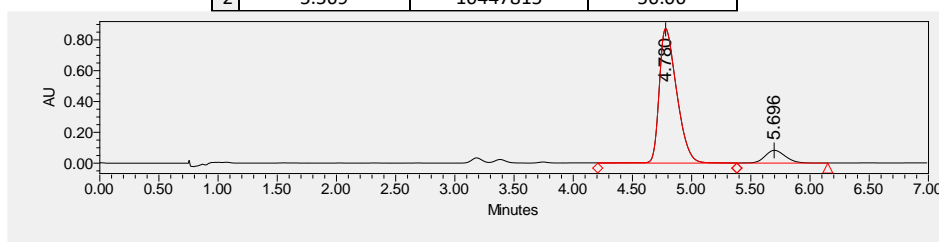

|   | Retention Time | Area    | % Area |
|---|----------------|---------|--------|
| 1 | 4.780          | 8906945 | 90.07  |
| 2 | 5.696          | 981497  | 9.93   |

**(S)-N-(2-benzyl-1-oxo-1-(phenylamino)-3-(N-phenylformamido)propan-2-yl)-4-methylbenzamide (8ad)**

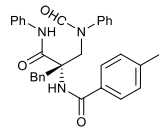

50.5 mg, >99% yield; white solid, melting point: 93.6-96.9 °C,  $[\alpha]_D^{25} = -22.0$  ( $c = 0.53$ ,  $\text{CH}_2\text{Cl}_2$ ).

Dissolved in MeOH for SFC; SFC (Daicel chiralcel OX-3,  $\text{CO}_2/\text{EtOH} = 80/20$ , flow rate = 1.5 mL/min,  $\lambda = 254$  nm) retention time:

$t_{\text{major}} = 8.64$  min,  $t_{\text{minor}} = 20.80$  min. er = 94:6.

$^1\text{H NMR}$  (400 MHz,  $\text{CDCl}_3$ )  $\delta$  8.84 (s, 1H), 8.22 (s, 1H), 7.55 (s, 1H), 7.43 (d,  $J = 7.9$  Hz, 2H), 7.33 (t,  $J = 7.8$  Hz, 2H), 7.24 (d,  $J = 6.5$  Hz, 2H), 7.21 – 7.01 (m, 12H), 5.10 (d,  $J = 15.1$  Hz, 1H), 4.86 (d,  $J = 15.1$  Hz, 1H), 3.87 (d,  $J = 13.7$  Hz, 1H), 3.40 (d,  $J = 13.7$  Hz, 1H), 2.34 (s, 3H).

$^{13}\text{C NMR}$  (101 MHz,  $\text{CDCl}_3$ )  $\delta$  168.8, 167.7, 164.7, 142.0, 140.3, 137.2, 134.7, 131.8, 130.2, 129.6, 129.0, 128.9, 128.3, 127.5, 127.3, 126.8, 124.9, 124.8, 120.8, 67.1, 46.3, 39.8, 21.5.

**IR** (neat):  $\nu$  ( $\text{cm}^{-1}$ ) 3318, 3060, 3032, 2927, 1651, 1598, 1490.

**HRMS** (ESI-TOF) calcd for  $\text{C}_{24}\text{H}_{23}\text{N}_3\text{O}_2^+$  ( $[\text{M} - \text{PhCH}_2 + \text{H}^+]$ ) = 399.1577, found 399.1567.

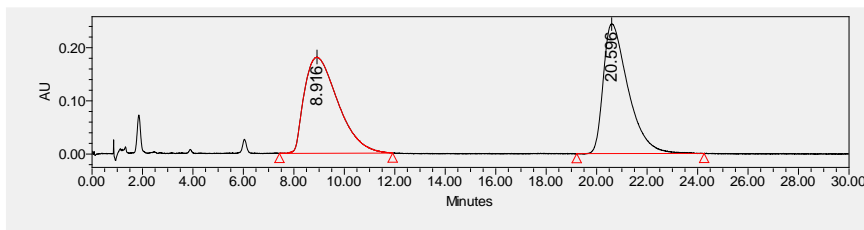

|   | Retention Time | Area     | % Area |
|---|----------------|----------|--------|
| 1 | 8.916          | 16714785 | 50.14  |
| 2 | 20.596         | 16620593 | 49.86  |

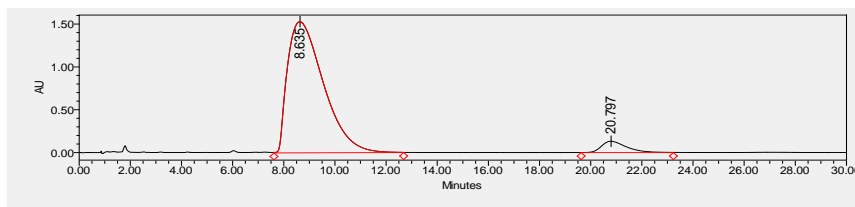

|   | Retention Time | Area      | % Area |
|---|----------------|-----------|--------|
| 1 | 8.635          | 149172062 | 94.27  |
| 2 | 20.797         | 9060010   | 5.73   |

**(E)-1,3-Diphenyl-5-(prop-1-en-1-yl)tetrahydropyrimidin-4(1H)-one (7aa)**

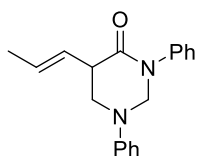

25.7 mg, 88% yield; light yellow oil;  $[\alpha]_D^{25} = -30.5$  ( $c = 0.42$ ,  $\text{CH}_2\text{Cl}_2$ ).

Dissolved in *i*PrOH for HPLC; HPLC (Chiralcel ODH, hexane/*i*PrOH = 80/20, flow rate 1.0 mL/min,  $\lambda = 254$  nm) retention time:  $t_{\text{minor}} = 20.19$  min,  $t_{\text{major}} = 21.61$  min, er = 96:4.

$^1\text{H NMR}$  (400 MHz, Chloroform-*d*)  $\delta$  7.42 (m, 2H), 7.31 (m, 5H), 6.99 – 6.90 (m, 3H), 5.75 – 5.56 (m, 2H), 5.14 (d,  $J = 11.6$  Hz, 1H), 5.04 (dd,  $J = 11.6, 2.0$  Hz, 1H), 3.97 (m, 1H), 3.59 (m, 1H), 3.40 (m, 1H), 1.74 (d,  $J = 4.0$  Hz, 3H).

$^{13}\text{C NMR}$  (101 MHz, Chloroform-*d*)  $\delta$  169.8, 147.2, 140.9, 129.6, 129.4, 129.3, 127.0, 126.3, 125.8, 120.6, 116.0, 66.4, 52.4,

43.45, 18.2.

IR (neat):  $\nu(\text{cm}^{-1})$  2914, 236, 1658, 1597, 1497, 1429, 1380, 1216, 1117, 1073, 965.

HRMS (ESI-TOF) calcd for  $\text{C}_{19}\text{H}_{20}\text{N}_2\text{NaO}^+$  ( $[\text{M}]+\text{Na}^+$ ) = 315.1468, found 315.1468.

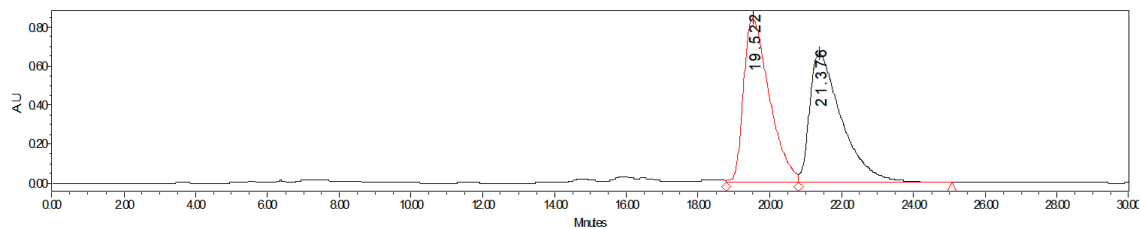

| Peak | Retention Time | Area     | % Area |
|------|----------------|----------|--------|
| 1    | 19.522         | 42250064 | 50.62  |
| 2    | 21.376         | 41216792 | 49.38  |

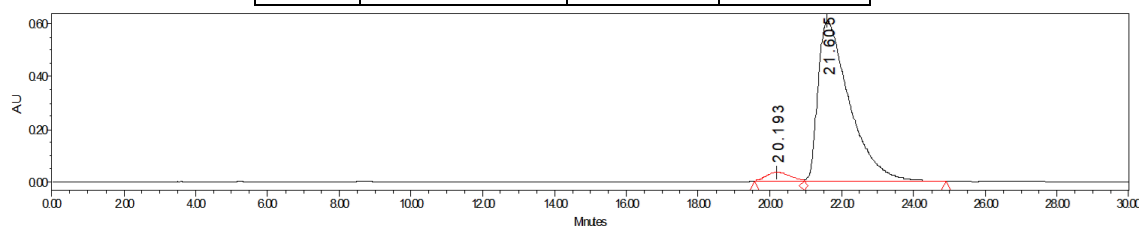

| Peak | Retention Time | Area     | % Area |
|------|----------------|----------|--------|
| 1    | 20.193         | 1514327  | 3.93   |
| 2    | 21.605         | 36990405 | 96.07  |

**(E)-5-(Prop-1-en-1-yl)-1,3-bis(3-(trifluoromethyl)phenyl)tetrahydropyrimidin-4(1H)-one (7ba)**

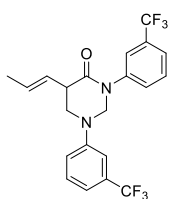

21.4 mg, 51% yield; light yellow oil;  $[\alpha]_D^{25} = -25.9$  ( $c = 2.17$ ,  $\text{CH}_2\text{Cl}_2$ ).

Dissolved in *i*PrOH for HPLC; HPLC (Chiralcel IH, hexane/*i*PrOH = 80/20, flow rate 1.0 mL/min,  $\lambda = 254$  nm) retention time:  $t_{\text{minor}} = 7.21$  min,  $t_{\text{major}} = 11.47$  min, er = 98:2.

**<sup>1</sup>H NMR** (400 MHz, Chloroform-*d*)  $\delta$  7.63 – 7.34 (m, 5H), 7.18 (d,  $J = 7.6$  Hz, 1H), 7.12 – 6.99 (m, 2H), 5.83 – 5.51 (m, 2H), 5.21 (d,  $J = 12.0$  Hz, 1H), 5.10 (d,  $J = 12.0$  Hz, 1H), 3.97 (m, 1H), 3.63 (m, 1H), 3.51 – 3.36 (m, 1H), 1.75 (d,  $J = 6.0$  Hz, 3H).

**<sup>13</sup>C NMR** (101 MHz, Chloroform-*d*)  $\delta$  169.8, 147.3, 141.1, 131.9 (q,  $J_{\text{C-F}} = 58.58$ ), 131.9 (d,  $J_{\text{C-F}} = 7.07$ ), 130.3, 130.2, 129.9, 129.1, 125.4, 125.0, 123.8 (q,  $J_{\text{C-F}} = 4.04$ ), 122.5 (q,  $J_{\text{C-F}} = 4.04$ ), 122.3, 118.5, 117.0 (q,  $J_{\text{C-F}} = 4.04$ ), 111.9 (q,  $J_{\text{C-F}} = 4.04$ ), 65.4, 51.8, 43.9, 18.1.

**<sup>19</sup>F NMR** (376 MHz, Chloroform-*d*)  $\delta$  -62.68.

**IR** (neat):  $\nu(\text{cm}^{-1})$  2919, 2336, 1663, 1592, 1479, 1438, 1382, 1313, 1264, 967.

**HRMS** (ESI-TOF) calcd for  $\text{C}_{21}\text{H}_{18}\text{F}_6\text{N}_2\text{NaO}^+$  ( $[\text{M}] + \text{Na}^+$ ) = 451.1216, found 451.1219.

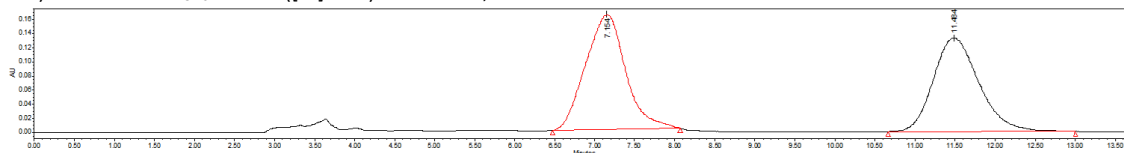

| Peak | Retention Time | Area    | % Area |
|------|----------------|---------|--------|
| 1    | 7.154          | 5653073 | 51.82  |
| 2    | 11.484         | 5256031 | 48.18  |

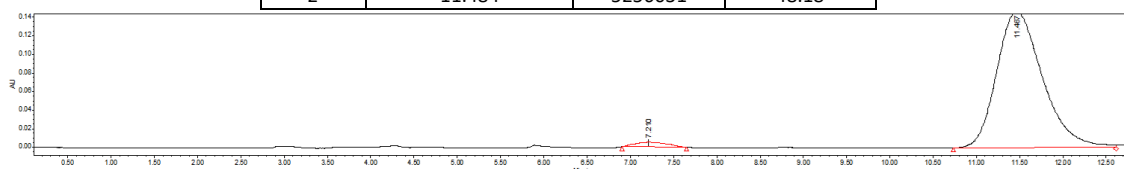

| Peak | Retention Time | Area    | % Area |
|------|----------------|---------|--------|
| 1    | 7.210          | 121330  | 2.23   |
| 2    | 11.467         | 5317243 | 97.77  |



**(E)-1,3-Bis(3-chlorophenyl)-5-(prop-1-en-1-yl)tetrahydropyrimidin-4(1H)-one (7ca)**

31.0 mg, 86% yield; colorless oil;  $[\alpha]_D^{24} = -8.8$  ( $c = 0.63$ ,  $\text{CH}_2\text{Cl}_2$ ).

Dissolved in *i*PrOH for HPLC; HPLC (Chiralcel ADH, hexane/*i*PrOH = 90/10, flow rate 1.0 mL/min,  $\lambda = 254$  nm) retention time:

$t_{\text{major}} = 14.91$  min,  $t_{\text{minor}} = 18.54$  min, er = 96:4.

**$^1\text{H}$  NMR** (400 MHz, Chloroform-*d*)  $\delta$  7.37 – 7.25 (m, 3H), 7.20 (q,  $J = 8.4$  Hz, 2H), 6.94 – 6.82 (m, 2H), 6.75 (dd,  $J = 8.4, 2.0$  Hz, 1H), 5.75 – 5.57 (m, 2H), 5.10 (d,  $J = 11.6$  Hz, 1H), 5.04 – 4.97 (m, 1H), 3.89 (dd,  $J = 12.8, 6.4$  Hz, 1H), 3.55 (dd,  $J = 12.8, 10.0$  Hz, 1H), 3.46 – 3.34 (m, 1H), 1.75 (d,  $J = 5.6$  Hz, 3H).

**$^{13}\text{C}$  NMR** (101 MHz, Chloroform-*d*)  $\delta$  169.8, 148.2, 141.8, 135.5, 134.8, 130.6, 130.3, 130.01, 127.3, 126.1, 125.6, 123.9, 120.5, 115.7, 113.5, 65.6, 51.8, 43.8, 18.2.

**IR** (neat):  $\nu(\text{cm}^{-1})$  2916, 2367, 1663, 1591, 1478, 1438, 1381, 1256, 1168, 966, 770.

**HRMS** (ESI-TOF) calcd for  $\text{C}_{19}\text{H}_{19}\text{Cl}_2\text{N}_2\text{O}^+$  ( $[\text{M}]^+\text{H}^+$ ) = 448.9859, 450.9838, 452.9818, found 448.9861, 450.9838, 452.9816.

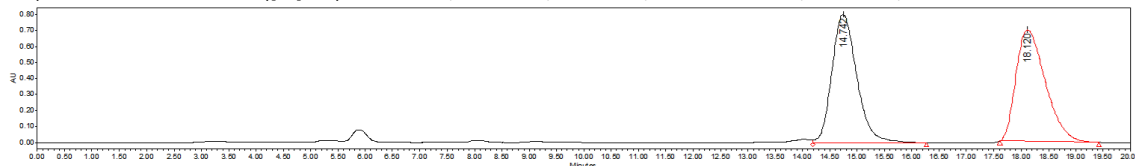

| Peak | Retention Time | Area     | % Area |
|------|----------------|----------|--------|
| 1    | 14.742         | 25131481 | 49.16  |
| 2    | 18.120         | 25994315 | 50.84  |

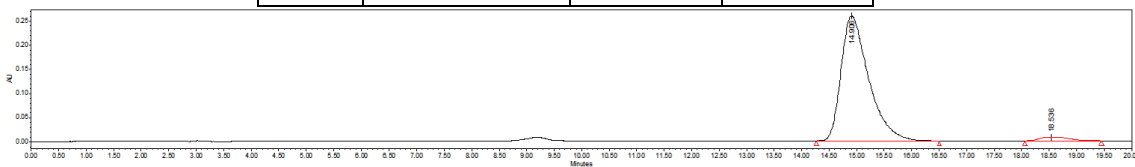

| Peak | Retention Time | Area    | % Area |
|------|----------------|---------|--------|
| 1    | 14.906         | 9079777 | 96.41  |
| 2    | 18.536         | 338277  | 3.59   |

**(E)-1,3-Bis(3-bromophenyl)-5-(prop-1-en-1-yl)tetrahydropyrimidin-4(1H)-one (7da)**

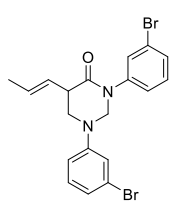

25.7 mg, 57% yield; pale yellow oil;  $[\alpha]_D^{24} = -5.1$  ( $c = 1.20$ ,  $\text{CH}_2\text{Cl}_2$ ).

Dissolved in *i*PrOH for HPLC; HPLC (Chiralcel ADH, hexane/*i*PrOH = 80/20, flow rate 1.0 mL/min,  $\lambda = 254$  nm) retention time:

$t_{\text{major}} = 9.93$  min,  $t_{\text{minor}} = 11.97$  min, er = 96:4.

$^1\text{H NMR}$  (400 MHz, Chloroform-*d*)  $\delta$  7.48 – 7.40 (m, 2H), 7.30 – 7.20 (m, 2H), 7.14 (t,  $J = 8.0$  Hz, 1H), 7.07 – 6.99 (m, 2H), 6.79 (dd,  $J = 8.4, 2.0$  Hz, 1H), 5.74 – 5.57 (m, 2H), 5.11 – 4.95 (m, 2H), 3.88 (dd,  $J = 12.8, 6.4$  Hz, 1H), 3.54 (dd,  $J = 12.8, 10.4$  Hz, 1H), 3.44 – 3.36 (m, 1H), 1.74 (d,  $J = 5.6$  Hz, 3H).

$^{13}\text{C NMR}$  (101 MHz, Chloroform-*d*)  $\delta$  169.7, 148.3, 141.9, 130.9, 130.53, 130.2, 130.0, 128.9, 125.6, 124.4, 123.6, 123.4, 122.6,

118.6, 114.0, 65.6, 51.7, 43.8, 18.2.

**IR** (neat):  $\nu(\text{cm}^{-1})$  2915, 2361, 1660, 1588, 1476, 1436, 1352, 1217, 1070, 965, 766.

**HRMS** (ESI-TOF) calcd for  $\text{C}_{19}\text{H}_{19}\text{Br}_2\text{N}_2\text{O}^+$  ( $[\text{M}]^+\text{H}^+$ ) = 448.9859, 450.9838, 452.9818, found 448.9861, 450.9838, 452.9816.

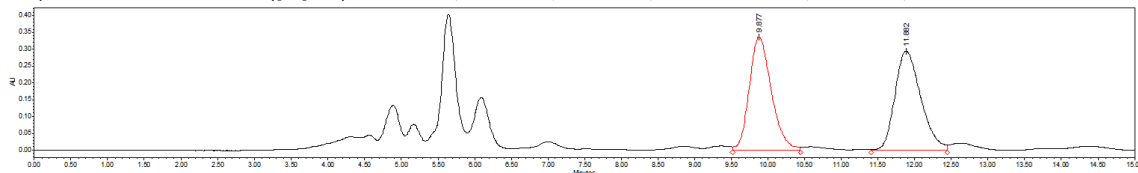

| Peak | Retention Time | Area    | % Area |
|------|----------------|---------|--------|
| 1    | 9.877          | 7039592 | 49.40  |
| 2    | 11.882         | 7209412 | 50.60  |

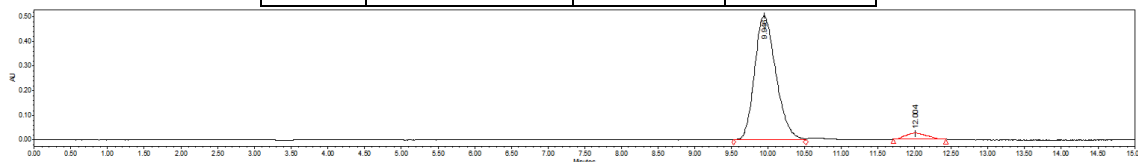

| Peak | Retention Time | Area     | % Area |
|------|----------------|----------|--------|
| 1    | 9.976          | 13406726 | 95.56  |
| 2    | 12.067         | 623212   | 4.44   |

**(E)-5-(Prop-1-en-1-yl)-1,3-di-m-tolyltetrahydropyrimidin-4(1H)-one (7ea)**

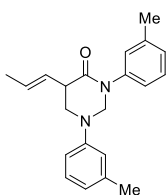

19.5 mg, 61% yield; pale yellow oil;  $[\alpha]_D^{24} = -26.6$  ( $c = 0.66$ ,  $\text{CH}_2\text{Cl}_2$ ).

Dissolved in *i*PrOH for HPLC; HPLC (Chiralcel ADH, hexane/*i*PrOH = 90/10, flow rate 1.0 mL/min,  $\lambda = 254$  nm) retention time:  $t_{\text{major}} = 12.39$  min,  $t_{\text{minor}} = 13.65$  min, er = 92:8.

$^1\text{H NMR}$  (400 MHz, Chloroform-*d*)  $\delta$  7.74 (t,  $J = 7.6$  Hz, 1H), 7.66 – 7.59 (m, 1H), 7.57 – 7.48 (m, 3H), 7.19 (s, 3H), 6.16 – 6.04 (m, 2H), 5.52 (d,  $J = 11.6$  Hz, 1H), 5.42 (dd,  $J = 11.6, 1.6$  Hz, 1H), 4.37 (m, 1H), 3.99 (dd,  $J = 13.0, 10.0$  Hz, 1H), 3.81 (m, 1H), 2.78 (d,  $J = 17.1$  Hz, 6H), 2.17 (d,  $J = 3.8$  Hz, 3H).

$^{13}\text{C NMR}$  (101 MHz, Chloroform-*d*)  $\delta$  170.5, 147.9, 141.4, 140.0, 139.8, 130.0, 129.9, 129.7, 128.5, 127.4, 127.0, 123.5, 122.1, 117.5, 113.8, 67.3, 52.98, 44.1, 22.4, 22.0, 18.8.

IR (neat):  $\nu(\text{cm}^{-1})$  2361, 1659, 1603, 1491, 1441, 1261, 1159, 966, 744.

HRMS (ESI-TOF) calcd for  $\text{C}_{21}\text{H}_{25}\text{N}_2\text{O}^+$  ( $[\text{M}] + \text{H}^+$ ) = 321.1961, found 321.1961.

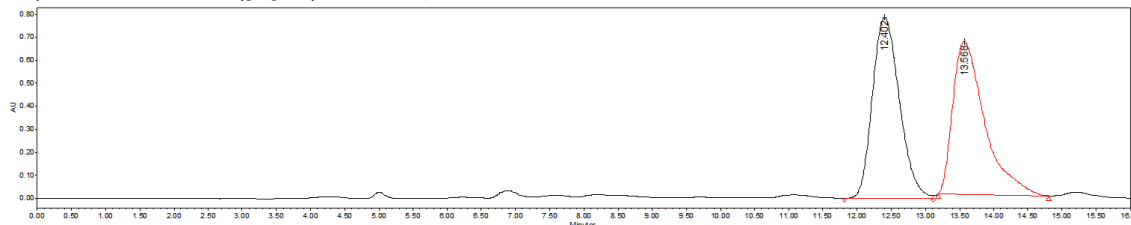

| Peak | Retention Time | Area     | % Area |
|------|----------------|----------|--------|
| 1    | 12.402         | 21491067 | 49.85  |
| 2    | 13.568         | 21621080 | 50.15  |

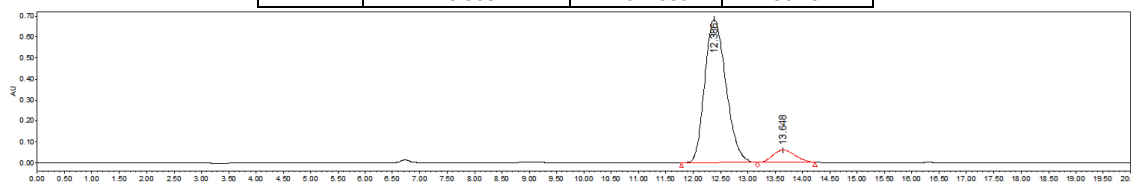

| Peak | Retention Time | Area     | % Area |
|------|----------------|----------|--------|
| 1    | 12.386         | 18496192 | 91.64  |
| 2    | 13.648         | 1688427  | 8.36   |

**(E)-1,3-Bis(3-chloro-4-methylphenyl)-5-(prop-1-en-1-yl)tetrahydropyrimidin-4(1H)-one (7fa)**

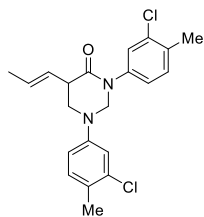

31.4 mg, 81% yield; colorless oil;  $[\alpha]_D^{24} = -14.2$  ( $c = 0.82$ ,  $\text{CH}_2\text{Cl}_2$ ).

Dissolved in *i*PrOH for HPLC; HPLC (Chiralcel ADH, hexane/*i*PrOH = 90/10, flow rate 1.0 mL/min,  $\lambda = 254$  nm) retention time:  $t_{\text{major}} = 18.55$  min,  $t_{\text{minor}} = 17.18$  min, er = 95:5.

$^1\text{H NMR}$  (400 MHz, Chloroform-*d*)  $\delta$  7.30 – 7.23 (m, 2H), 7.14 – 7.05 (m, 2H), 6.90 (d,  $J = 2.4$  Hz, 1H), 6.70 (dd,  $J = 8.4, 2.4$  Hz, 1H), 5.73 – 5.52 (m, 2H), 5.03 (d,  $J = 11.6$  Hz, 1H), 4.91 (dd,  $J = 11.6, 1.6$  Hz, 1H), 3.86 (m, 1H), 3.51 (dd,  $J = 13.0, 10.4$  Hz, 1H), 3.34 (dt,  $J = 10.4, 6.0$  Hz, 1H), 2.32 (d,  $J = 30.0$  Hz, 6H), 1.72 (d,  $J = 5.2$  Hz, 3H).

$^{13}\text{C NMR}$  (101 MHz, Chloroform-*d*)  $\delta$  169.7, 146.2, 139.4, 135.3, 135.1, 134.7, 131.6, 131.4, 129.8, 128.1, 126.4, 125.9, 124.2, 116.8, 114.4, 66.5, 52.4, 43.5, 19.7, 19.0, 18.2.

IR (neat):  $\nu(\text{cm}^{-1})$  2361, 1660, 1609, 1563, 1497, 1433, 1381, 1222, 1004, 737.

HRMS (ESI-TOF) calcd for  $\text{C}_{21}\text{H}_{23}\text{Cl}_2\text{N}_2\text{O}^+$  ( $[\text{M}] + \text{H}^+$ ) = 389.1182, 391.1152, 393.1123, found 389.1183, 391.1152, 393.1119.

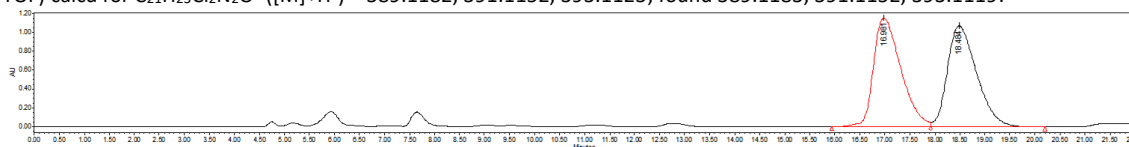

| Peak | Retention Time | Area     | % Area |
|------|----------------|----------|--------|
| 1    | 16.981         | 43686545 | 50.31  |
| 2    | 18.484         | 43144762 | 49.69  |

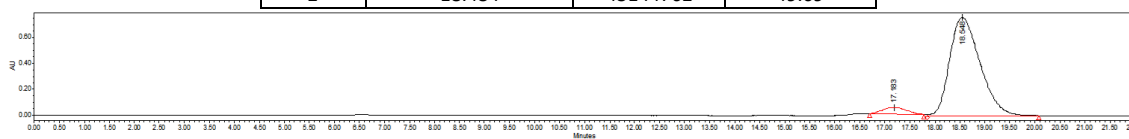

| Peak | Retention Time | Area     | % Area |
|------|----------------|----------|--------|
| 1    | 17.183         | 1631113  | 4.89   |
| 2    | 18.548         | 31738654 | 95.11  |

**(E)-1,3-Bis(4-fluorophenyl)-5-(prop-1-en-1-yl)tetrahydropyrimidin-4(1H)-one (7ga)**

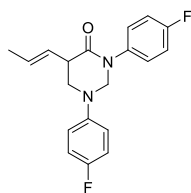

27.2 mg, 83% yield; yellow oil;  $[\alpha]_D^{24} = -49.5$  ( $c = 1.09$ ,  $\text{CH}_2\text{Cl}_2$ ).

Dissolved in *i*PrOH for HPLC; HPLC (Chiralcel ADH, hexane/*i*PrOH = 80/20, flow rate 1.0 mL/min,  $\lambda = 254$  nm) retention time:  $t_{\text{major}} = 14.82$  min,  $t_{\text{minor}} = 10.63$  min, er = 97:3.

$^1\text{H NMR}$  (400 MHz, Chloroform-*d*)  $\delta$  7.25 (dd,  $J = 8.4, 4.8$  Hz, 2H), 7.10 (t,  $J = 8.4$  Hz, 2H), 7.00 (t,  $J = 8.8$  Hz, 2H), 6.90 (dd,  $J = 9.2, 4.4$  Hz, 2H), 5.73 – 5.53 (m, 2H), 5.09 – 4.87 (m, 2H), 3.87 (dd,  $J = 13.2, 6.4$  Hz, 1H), 3.54 (dd,  $J = 13.2, 10.4$  Hz, 1H), 3.34 (dt,  $J = 10.0, 6.0$  Hz, 1H), 1.72 (d,  $J = 4.4$  Hz, 3H).

$^{13}\text{C NMR}$  (101 MHz, Chloroform-*d*)  $\delta$  169.8, 143.8 (d,  $J_{\text{CF}} = 2.02$  Hz), 136.7 (d,  $J_{\text{CF}} = 2.02$  Hz), 129.6, 127.7 (d,  $J_{\text{CF}} = 9.09$  Hz), 126.1, 118.2 (d,  $J_{\text{CF}} = 7.07$  Hz), 116.3 (d,  $J_{\text{CF}} = 5.05$  Hz), 116.1 (d,  $J_{\text{CF}} = 4.04$  Hz), 76.8, 67.7, 53.4, 43.4, 18.2.

$^{19}\text{F NMR}$  (376 MHz, Chloroform-*d*)  $\delta$  -114.51, -122.76.

IR (neat):  $\nu(\text{cm}^{-1})$  2361, 1658, 1601, 1508, 1258, 966, 752.

HRMS (ESI-TOF) calcd for  $\text{C}_{19}\text{H}_{19}\text{F}_2\text{N}_2\text{O}^+$  ( $[\text{M}] + \text{H}^+$ ) = 329.1460, found 329.1460.

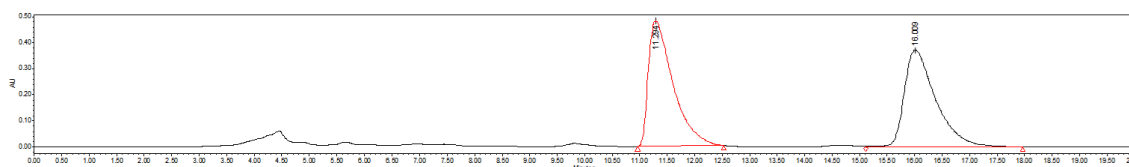

| Peak | Retention Time | Area     | % Area |
|------|----------------|----------|--------|
| 1    | 11.294         | 14988032 | 50.66  |
| 2    | 16.009         | 14600182 | 49.34  |

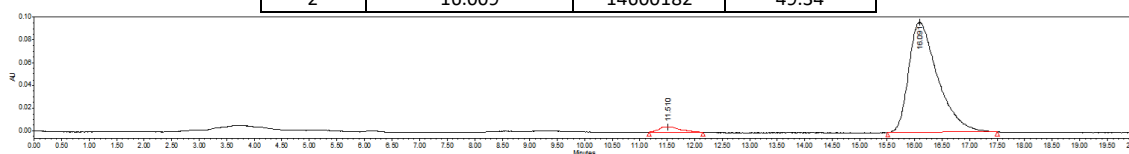

| Peak | Retention Time | Area    | % Area |
|------|----------------|---------|--------|
| 1    | 11.510         | 120742  | 3.30   |
| 2    | 16.091         | 3540428 | 96.70  |

**(E)-1,3-Bis(4-chlorophenyl)-5-(prop-1-en-1-yl)tetrahydropyrimidin-4(1H)-one (7ha)**

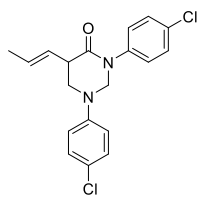

28.2 mg, 78% yield; colorless oil;  $[\alpha]_D^{24} = -11.43$  ( $c = 0.29$ ,  $\text{CH}_2\text{Cl}_2$ ).

Dissolved in *i*PrOH for HPLC; HPLC (Chiralcel ADH, hexane/*i*PrOH = 80/20, flow rate 1.0 mL/min,  $\lambda = 254$  nm) retention time:  $t_{\text{major}} = 20.16$  min,  $t_{\text{minor}} = 15.17$  min, er = 96:4.

$^1\text{H NMR}$  (400 MHz, Chloroform-*d*)  $\delta$  7.38 (d,  $J = 8.4$  Hz, 2H), 7.23 (dd,  $J = 13.2, 8.8$  Hz, 4H), 6.82 (d,  $J = 8.8$  Hz, 2H), 5.75 – 5.54 (m, 2H), 5.09 (d,  $J = 11.6$  Hz, 1H), 4.97 (d,  $J = 11.6$  Hz, 1H), 3.90 (dd,  $J = 13.2, 6.4$  Hz, 1H), 3.55 (dd,  $J = 13.2, 10.4$  Hz, 1H), 3.41 – 3.32 (m, 1H), 1.73 (d,  $J = 5.2$  Hz, 3H).

$^{13}\text{C NMR}$  (101 MHz, Chloroform-*d*)  $\delta$  169.7, 145.7, 139.2, 132.6, 129.9, 129.6, 129.5, 127.0, 125.8, 117.2, 66.2, 52.4, 43.6,

18.2.

**IR** (neat):  $\nu(\text{cm}^{-1})$  2361, 1661, 1595, 1493, 1437, 1264, 1009, 739.

**HRMS** (ESI-TOF) calcd for  $\text{C}_{19}\text{H}_{19}\text{Cl}_2\text{N}_2\text{O}^+$  ( $[\text{M}]^+\text{H}^+$ ) = 361.0869, 363.0839, 365.0810, found 361.0872, 363.9840, 365.0807.

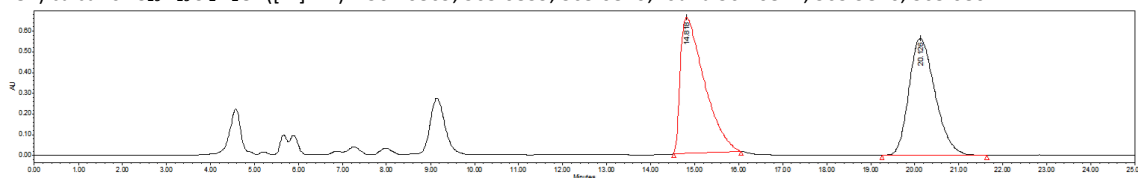

| Peak | Retention Time | Area     | % Area |
|------|----------------|----------|--------|
| 1    | 15.200         | 10849588 | 50.01  |
| 2    | 20.359         | 10844629 | 49.99  |

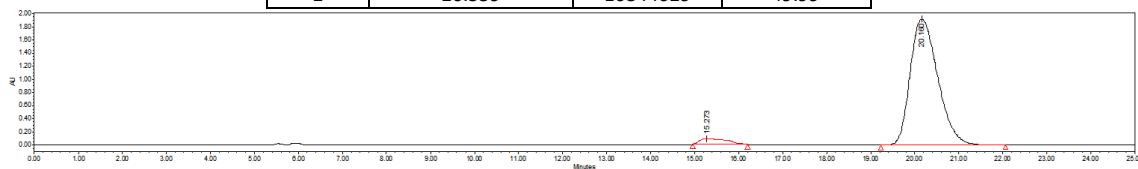

| Peak | Retention Time | Area     | % Area |
|------|----------------|----------|--------|
| 1    | 15.273         | 3892297  | 4.46   |
| 2    | 20.160         | 83360189 | 95.54  |

**(E)-1,3-Bis(4-bromophenyl)-5-(prop-1-en-1-yl)tetrahydropyrimidin-4(1H)-one (7ia)**

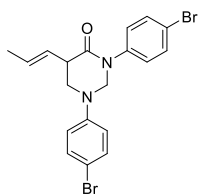

38.7 mg, 86% yield; yellow oil;  $[\alpha]_D^{24} = -8.4$  ( $c = 0.70$ ,  $\text{CH}_2\text{Cl}_2$ ).

Dissolved in *i*PrOH for HPLC; HPLC (Chiralcel ADH, hexane/*i*PrOH = 80/20, flow rate 1.0 mL/min,  $\lambda = 254$  nm) retention time:  $t_{\text{major}} = 23.61$  min,  $t_{\text{minor}} = 18.75$  min, er = 94:6.

$^1\text{H NMR}$  (400 MHz, Chloroform-*d*)  $\delta = 7.53$  (d,  $J = 8.4$  Hz, 2H), 7.38 (d,  $J = 8.8$  Hz, 2H), 7.15 (d,  $J = 8.4$  Hz, 2H), 6.76 (d,  $J = 8.8$  Hz, 2H), 5.75 – 5.55 (m, 2H), 5.09 (d,  $J = 12.0$  Hz, 1H), 5.00 – 4.93 (m, 1H), 3.89 (m, 1H), 3.54 (dd,  $J = 13.2, 10.4$  Hz, 1H), 3.37 (dt,  $J = 10.0, 6.4$  Hz, 1H), 1.73 (d,  $J = 5.6$  Hz, 3H).

$^{13}\text{C NMR}$  (101 MHz, Chloroform-*d*)  $\delta = 169.7, 146.1, 139.7, 132.5, 132.4, 130.0, 127.3, 125.7, 117.4, 113.0, 65.9, 52.2, 43.6$ .

18.2.

**IR** (neat):  $\nu(\text{cm}^{-1})$  2361, 1661, 1595, 1493, 1437, 1278, 1009, 753.

**HRMS** (ESI-TOF) calcd for  $\text{C}_{19}\text{H}_{19}\text{Br}_2\text{N}_2\text{O}^+$  ( $[\text{M}] + \text{H}^+$ ) = 448.9859, 450.9838, 452.9818, found 448.9865, 450.9840, 452.9816.

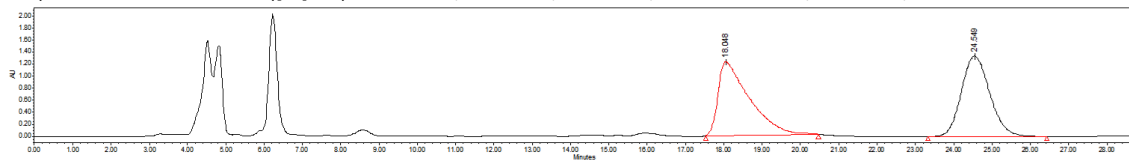

| Peak | Retention Time | Area     | % Area |
|------|----------------|----------|--------|
| 1    | 18.048         | 69085489 | 50.29  |
| 2    | 24.549         | 68275791 | 49.71  |

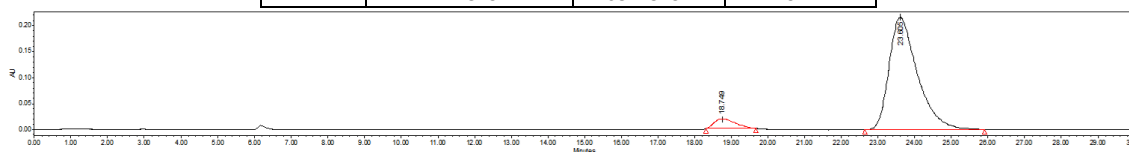

| Peak | Retention Time | Area     | % Area |
|------|----------------|----------|--------|
| 1    | 18.749         | 764290   | 6.16   |
| 2    | 23.605         | 11633203 | 93.84  |

**(E)-5-(Prop-1-en-1-yl)-1,3-di-p-tolyltetrahydropyrimidin-4(1H)-one (7ja)**

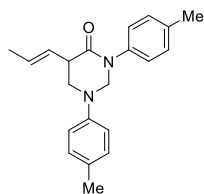

25.9 mg, 81% yield; colorless oil;  $[\alpha]_D^{24} = -19.8$  ( $c = 0.86$ ,  $\text{CH}_2\text{Cl}_2$ ).

Dissolved in *i*PrOH for HPLC; HPLC (Chiralcel ODH, hexane/*i*PrOH = 90/10, flow rate 1.0 mL/min,  $\lambda = 254$  nm) retention time:  $t_{\text{major}} = 18.68$  min,  $t_{\text{minor}} = 23.69$  min, er = 95:5.

$^1\text{H NMR}$  (400 MHz, Chloroform-*d*)  $\delta$  7.26 – 7.15 (m, 4H), 7.11 (d,  $J = 6.4$  Hz, 2H), 6.87 (d,  $J = 6.4$  Hz, 2H), 5.65 (s, 2H), 5.09 – 4.91 (m, 2H), 3.92 (d,  $J = 11.6$  Hz, 1H), 3.54 (t,  $J = 11.6$  Hz, 1H), 3.36 (s, 1H), 2.33 (d,  $J = 28.0$  Hz, 6H), 1.73 (s, 3H).

$^{13}\text{C NMR}$  (101 MHz, Chloroform-*d*)  $\delta$  169.8, 145.0, 136.8, 130.3, 130.1, 129.9, 129.2, 126.6, 125.8, 116.5, 67.2, 52.9, 43.3, 21.1, 20.5, 18.2.

IR (neat):  $\nu$  ( $\text{cm}^{-1}$ ) 2920, 1658, 1613, 1513, 1438, 1221, 1002, 814.

HRMS (ESI-TOF) calcd for  $\text{C}_{21}\text{H}_{25}\text{N}_2\text{O}^+$  ( $[\text{M}+\text{H}]^+$ ) = 321.1961, found 321.1959.

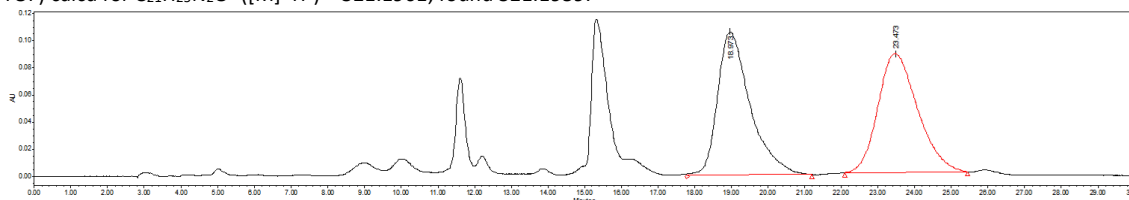

| Peak | Retention Time | Area    | % Area |
|------|----------------|---------|--------|
| 1    | 18.973         | 6438594 | 49.59  |
| 2    | 23.473         | 6545091 | 50.41  |

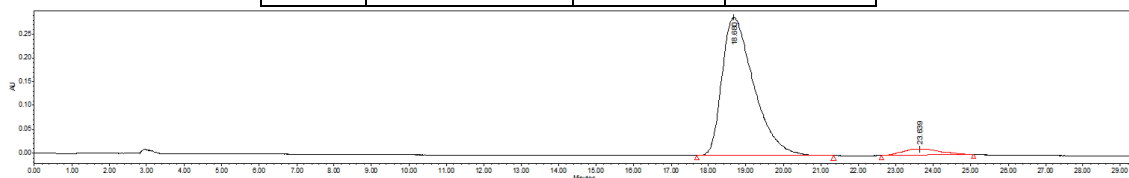

| Peak | Retention Time | Area     | % Area |
|------|----------------|----------|--------|
| 1    | 18.680         | 17134946 | 95.01  |
| 2    | 23.639         | 900255   | 4.99   |



**(E)-5-(Prop-1-en-1-yl)-1,3-bis(4-(trifluoromethoxy)phenyl)tetrahydropyrimidin-4(1H)-one (7ka)**

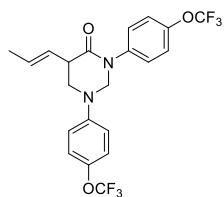

35.4 mg, 77% yield; yellow oil;  $[\alpha]_D^{24} = -16.7$  ( $c = 1.67$ ,  $\text{CH}_2\text{Cl}_2$ ).

Dissolved in *i*PrOH for HPLC; HPLC (Chiralcel ODH, hexane/*i*PrOH = 90/10, flow rate 1.0 mL/min,  $\lambda = 254$  nm) retention time:  $t_{\text{major}} = 9.66$  min,  $t_{\text{minor}} = 12.01$  min, er = 93:7.

$^1\text{H NMR}$  (400 MHz, Chloroform-*d*)  $\delta$  7.36 – 7.24 (m, 4H), 7.16 (d,  $J = 8.4$  Hz, 2H), 6.89 (d,  $J = 8.8$  Hz, 2H), 5.78 – 5.54 (m, 2H), 5.11 (s, 1H), 5.01 (d,  $J = 11.6$  Hz, 1H), 3.92 (dd,  $J = 13.2, 6.4$  Hz, 1H), 3.58 (dd,  $J = 12.8, 10.0$  Hz, 1H), 3.45 – 3.35 (m, 1H), 1.74 (d,  $J = 5.6$  Hz, 3H).

$^{13}\text{C NMR}$  (101 MHz, Chloroform-*d*)  $\delta$  169.8, 147.6, 145.9, 139.2, 130.0, 127.1, 125.8, 122.6, 121.9, 116.70, 66.3, 52.4,

43.7, 18.2.

$^{19}\text{F NMR}$  (376 MHz, Chloroform-*d*)  $\delta$  -57.96, -58.33.

IR (neat):  $\nu(\text{cm}^{-1})$  2361, 1656, 1614, 1513, 1440, 1265, 966, 736.

HRMS (ESI-TOF) calcd for  $\text{C}_{21}\text{H}_{19}\text{F}_6\text{N}_2\text{O}_3^+$  ( $[\text{M}]+\text{H}^+$ ) = 461.1294, found 461.1295.

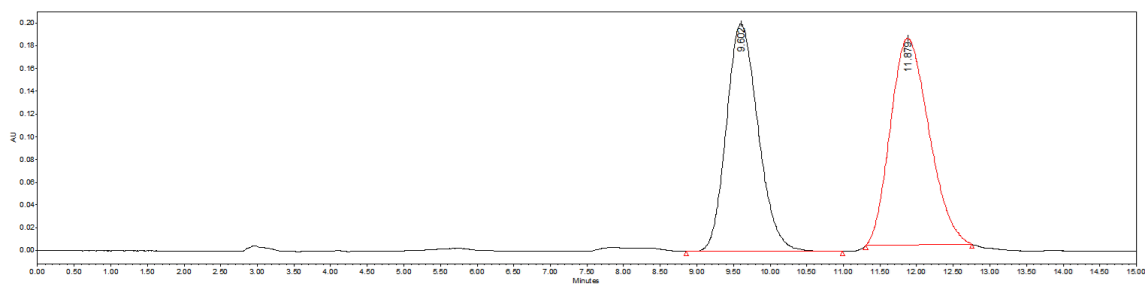

| Peak | Retention Time | Area    | % Area |
|------|----------------|---------|--------|
| 1    | 9.602          | 6037537 | 48.04  |
| 2    | 11.879         | 6530334 | 51.96  |

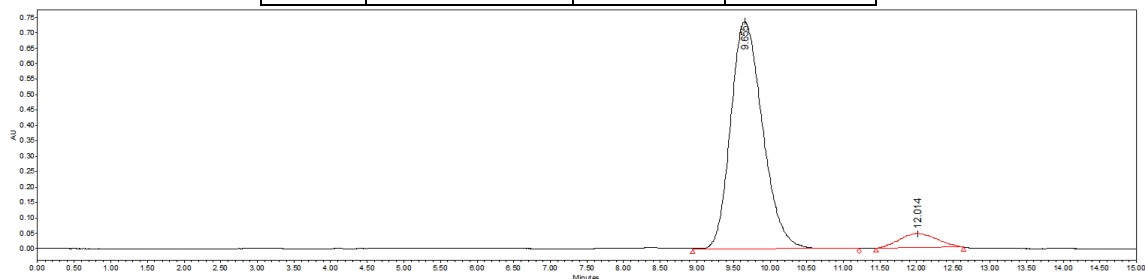

| Peak | Retention Time | Area     | % Area |
|------|----------------|----------|--------|
| 1    | 9.655          | 22238697 | 93.30  |
| 2    | 12.014         | 1595874  | 6.70   |

**(E)-1,3-Bis(4-methoxyphenyl)-5-(prop-1-en-1-yl)tetrahydropyrimidin-4(1H)-one (7la)**

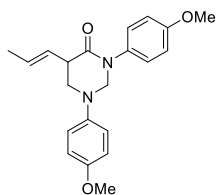

17.6 mg, 50% yield; colorless oil;  $[\alpha]_D^{24} = -18.1$  ( $c = 1.11$ ,  $\text{CH}_2\text{Cl}_2$ ).

Dissolved in *i*PrOH for HPLC; HPLC (Chiralcel IA, hexane/*i*PrOH = 70/30, flow rate 1.0 mL/min,  $\lambda = 254$  nm) retention time:  $t_{\text{major}} = 23.30$  min,  $t_{\text{minor}} = 16.94$  min, er = 90:10.

$^1\text{H NMR}$  (400 MHz, Chloroform-*d*)  $\delta$  7.24 – 7.17 (m, 2H), 6.94 (m, 4H), 6.89 – 6.83 (m, 2H), 5.75 – 5.51 (m, 2H), 5.01 (d,  $J = 11.6$  Hz, 1H), 4.84 (dd,  $J = 11.6, 1.6$  Hz, 1H), 3.88 – 3.75 (m, 7H), 3.51 (dd,  $J = 13.2, 10.0$  Hz, 1H), 3.31 (dt,  $J = 10.4, 5.6$  Hz, 1H), 1.72 (d,  $J = 4.0$  Hz, 3H).

$^{13}\text{C NMR}$  (101 MHz, Chloroform-*d*)  $\delta$  169.8, 158.3, 154.5, 141.4, 133.6, 129.1, 127.2, 126.6, 118.7, 114.8, 114.6, 68.5,

55.5, 53.9, 43.1, 18.2.

**IR** (neat):  $\nu$  ( $\text{cm}^{-1}$ ) 2361, 1658, 1590, 1506, 1487, 1262, 1227, 745.

**HRMS** (ESI-TOF) calcd for  $\text{C}_{21}\text{H}_{25}\text{N}_2\text{O}_3^+$  ( $[\text{M}+\text{H}^+]$ ) = 353.1860, found 353.1858.

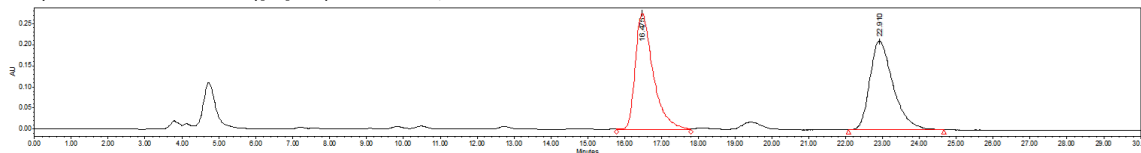

| Peak | Retention Time | Area    | % Area |
|------|----------------|---------|--------|
| 1    | 16.475         | 9285959 | 50.12  |
| 2    | 22.910         | 9242540 | 49.88  |

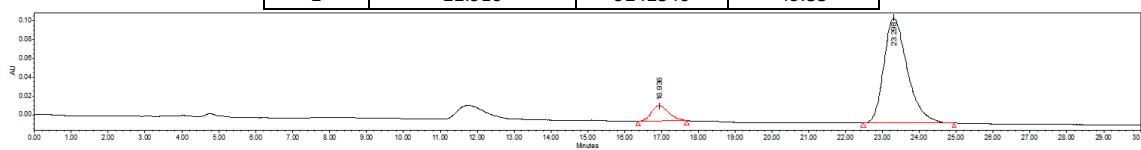

| Peak | Retention Time | Area    | % Area |
|------|----------------|---------|--------|
| 1    | 16.936         | 528581  | 9.65   |
| 2    | 23.298         | 4946728 | 90.35  |

**(E)-5-(Pent-1-en-1-yl)-1,3-diphenyltetrahydropyrimidin-4(1H)-one (7ab)**

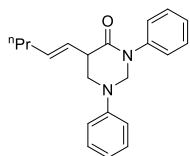

11.9 mg, 39% yield; pale yellow oil;  $[\alpha]^{24}_D = -114.6$  ( $c = 0.60$ ,  $\text{CH}_2\text{Cl}_2$ ).

Dissolved in *i*PrOH for HPLC; HPLC (Chiralcel ODH, hexane/*i*PrOH = 80/20, flow rate 1.0 mL/min,  $\lambda = 254$  nm) retention time:  $t_{\text{major}} = 17.18$  min,  $t_{\text{minor}} = 13.82$  min, er = 84:16.

$^1\text{H NMR}$  (400 MHz, Chloroform-*d*)  $\delta$  7.47 – 7.37 (m, 2H), 7.34 – 7.25 (m, 5H), 6.99 – 6.89 (m, 3H), 5.73 – 5.54 (m, 2H), 5.15 (d,  $J = 11.6$  Hz, 1H), 5.05 (m, 1H), 3.98 (m, 1H), 3.60 (dd,  $J = 13.2, 10.4$  Hz, 1H), 3.40 (m, 1H), 2.05 (q,  $J = 7.6$  Hz, 2H), 1.41 (m, 2H), 0.91 (t,  $J = 7.6$  Hz, 3H).

$^{13}\text{C NMR}$  (101 MHz, Chloroform-*d*)  $\delta$  169.9, 147.2, 134.6, 129.6, 129.3, 127.0, 125.8, 125.2, 120.7, 116.0, 66.4, 52.5, 43.5, 34.8, 22.3, 13.7.

IR (neat):  $\nu$  ( $\text{cm}^{-1}$ ) 2361, 1660, 1266, 749.

HRMS (ESI-TOF) calcd for  $\text{C}_{21}\text{H}_{25}\text{N}_2\text{O}^+$  ( $[\text{M}+\text{H}^+]$ ) = 321.1961, found 321.1962.

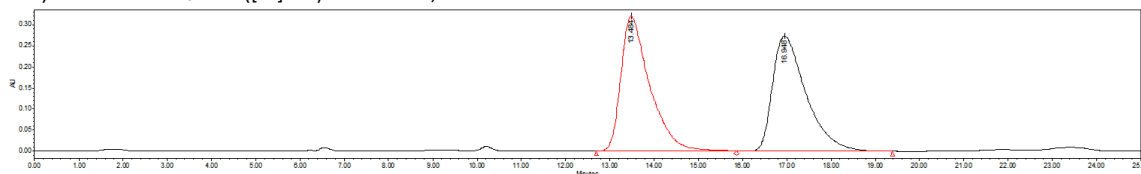

| Peak | Retention Time | Area     | % Area |
|------|----------------|----------|--------|
| 1    | 13.484         | 14505855 | 50.14  |
| 2    | 16.948         | 14426743 | 49.86  |

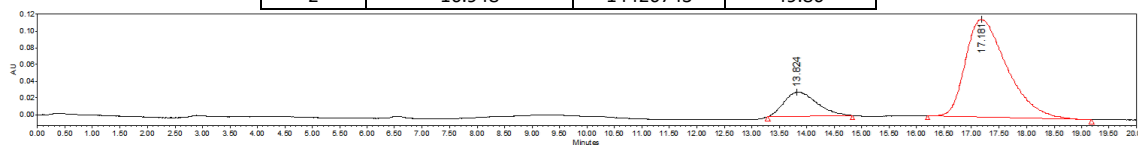

| Peak | Retention Time | Area    | % Area |
|------|----------------|---------|--------|
| 1    | 13.824         | 1204849 | 16.45  |
| 2    | 17.181         | 6117992 | 83.55  |

**(E)-5-(Hex-1-en-1-yl)-1,3-diphenyltetrahydropyrimidin-4(1H)-one (7ac)**

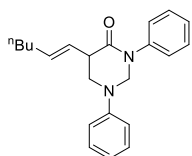

23.7 mg, 71% yield; pale yellow oil;  $[\alpha]_D^{24} = -38.9$  ( $c = 0.28$ ,  $\text{CH}_2\text{Cl}_2$ ).

Dissolved in *i*PrOH for HPLC; HPLC (Chiralcel IE, hexane/*i*PrOH = 80/20, flow rate 1.0 mL/min,  $\lambda = 254$  nm) retention time:  $t_{\text{major}} = 20.27$  min,  $t_{\text{minor}} = 22.23$  min, er = 85:15.

$^1\text{H NMR}$  (400 MHz, Chloroform-*d*)  $\delta$  7.47 – 7.38 (m, 2H), 7.30 (q,  $J = 7.2$  Hz, 5H), 6.95 (d,  $J = 8.8$  Hz, 3H), 5.72 – 5.58 (m, 2H), 5.15 (d,  $J = 11.6$  Hz, 1H), 5.04 (m, 1H), 3.98 (m, 1H), 3.60 (m, 1H), 3.45 – 3.36 (m, 1H), 2.08 (m, 2H), 1.42 – 1.29 (m, 4H), 0.90 (t,  $J = 7.2$  Hz, 3H).

$^{13}\text{C NMR}$  (101 MHz, Chloroform-*d*)  $\delta$  169.8, 147.2, 140.9, 134.7, 120.6, 116.0, 66.3, 52.4, 43.4, 32.4, 31.3, 22.2, 14.0.

IR (neat):  $\nu(\text{cm}^{-1})$  2361, 1659, 1458, 1266, 751.

HRMS (ESI-TOF) calcd fo  $\text{C}_{22}\text{H}_{27}\text{N}_2\text{O}^+$  ( $[\text{M}+\text{H}^+$ ) = 335.2118, found 335.2116.

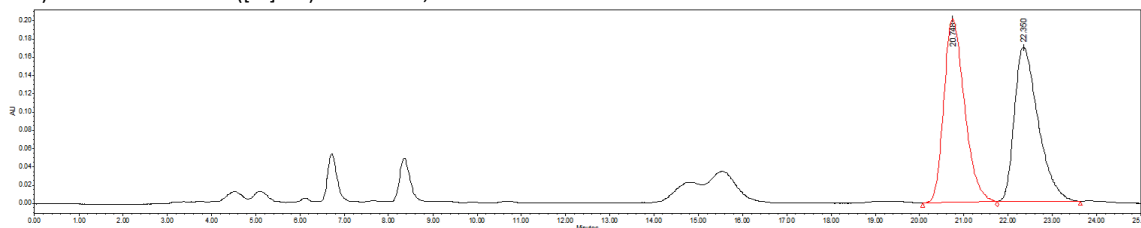

| Peak | Retention Time | Area    | % Area |
|------|----------------|---------|--------|
| 1    | 20.748         | 6525884 | 50.82  |
| 2    | 22.350         | 6315460 | 49.18  |

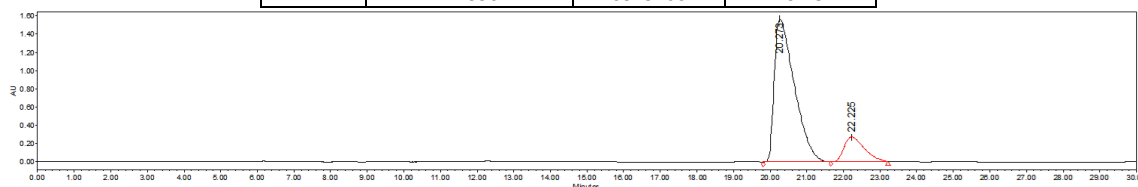

| Peak | Retention Time | Area     | % Area |
|------|----------------|----------|--------|
| 1    | 20.273         | 59173325 | 85.40  |
| 2    | 22.225         | 10117239 | 14.60  |

### 13. References

1. Y. H. Wen, X. Huang, J. L. Huang, Y. Xiong, B. Qin, X. M. Feng, *Synlett*, 2005, 2445.
2. (a) S. X. Dong, X. H. Liu, X. M. Feng, *J. Am. Chem. Soc.*, 2010, **132**, 10650; (b) L. H. Xie, Y. Li, S. X. Dong, X. M. Feng, X. H. Liu, *Chem. Commun.*, 2021, **57**, 239; (c) J. Z. Li, Y. H. Mo, L. Q. Yan, X. M. Feng, Z. S. Su, X. H. Liu, *CCS Chemistry*, 2021, 1.
3. N. F. Hu, H. Jung, Y. Zheng, J. Lee, L. L. Zhang, Z. Ullah, X. L. Xie, K. Harms, M.-H. Baik, E. Meggers, *Angew. Chem., Int. Ed.*, 2018, **57**, 6242.
4. C. H. Zhu, G. Y. Xu, J. T. Sun, *Angew. Chem., Int. Ed.*, 2016, **55**, 11867–11871.
5. G. M. Sheldrick, *Acta Cryst.*, 2008, **A64**, 112–122.
6. G. M. Sheldrick, *Acta Cryst.*, 2015, **A71**, 3–8.
7. G. M. Sheldrick, *Acta Cryst.*, 2015, **C71**, 3–8.
8. O. V. Dolomanov, L. J. Bourhis, R. J. Gildea, J. A. K. Howard, H. J. Puschmann, *Appl. Cryst.*, 2009, **42**, 339–341.
9. A. L. J. Spek, *Appl. Cryst.*, 2003, **36**, 7–13.

## 14. Copies of NMR spectra for products

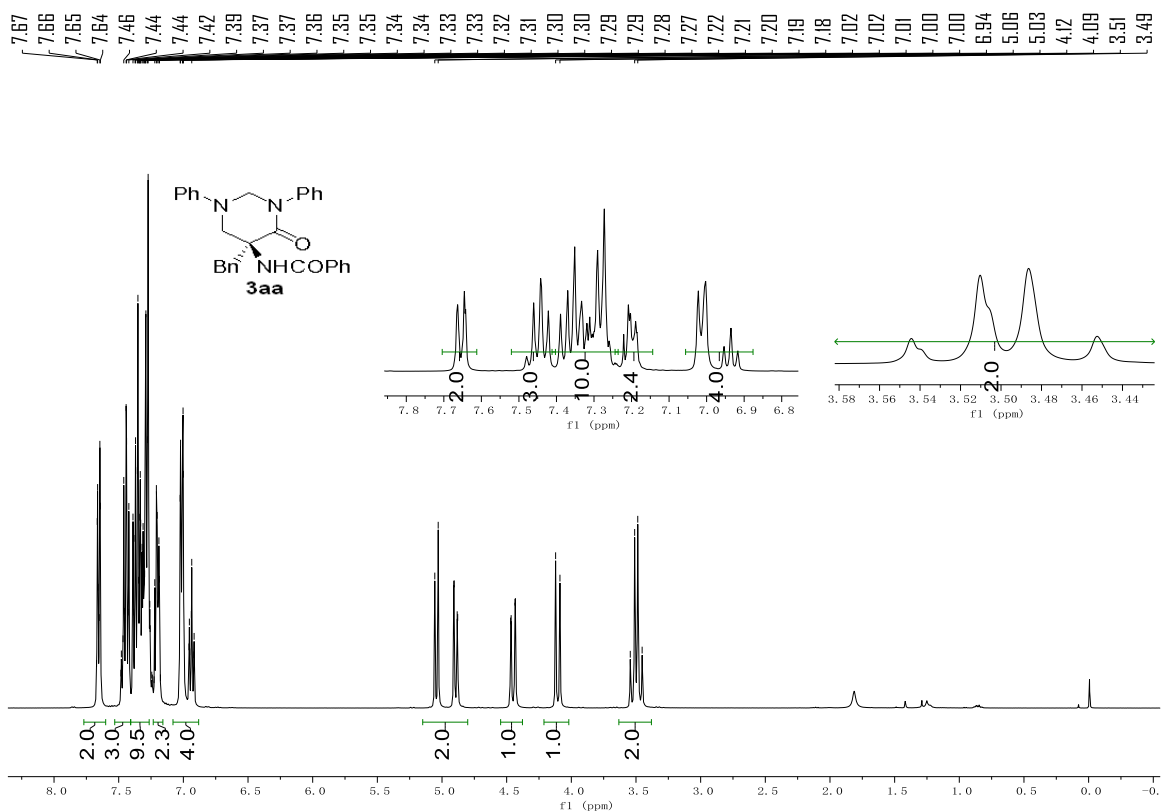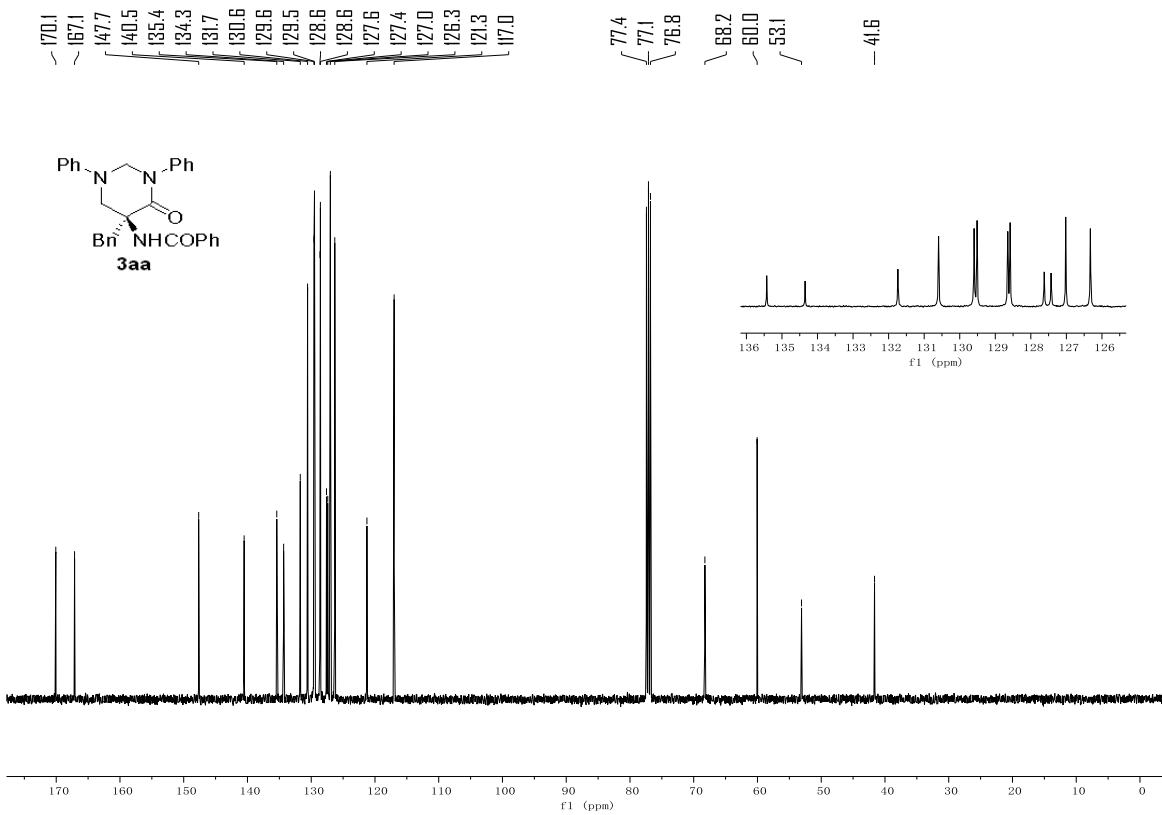

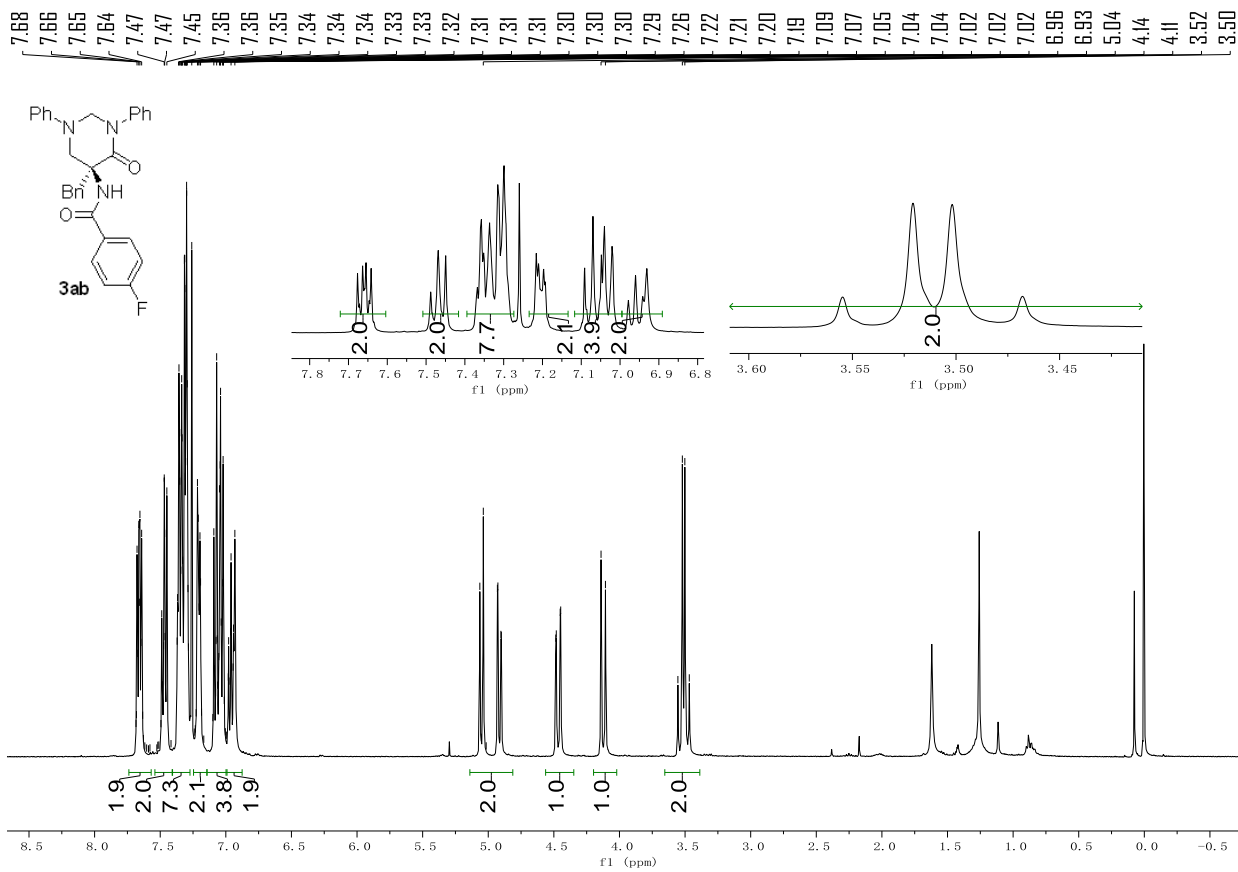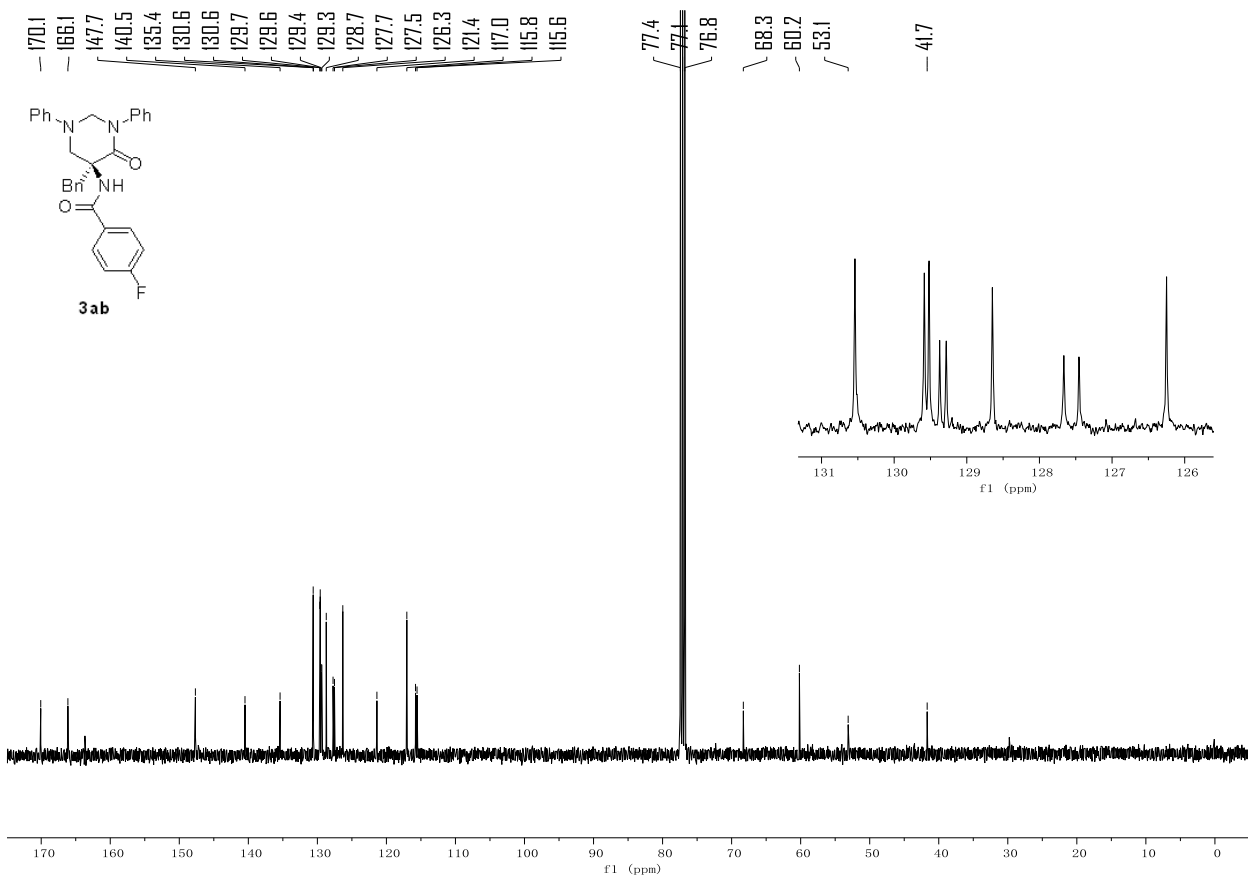

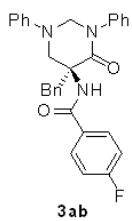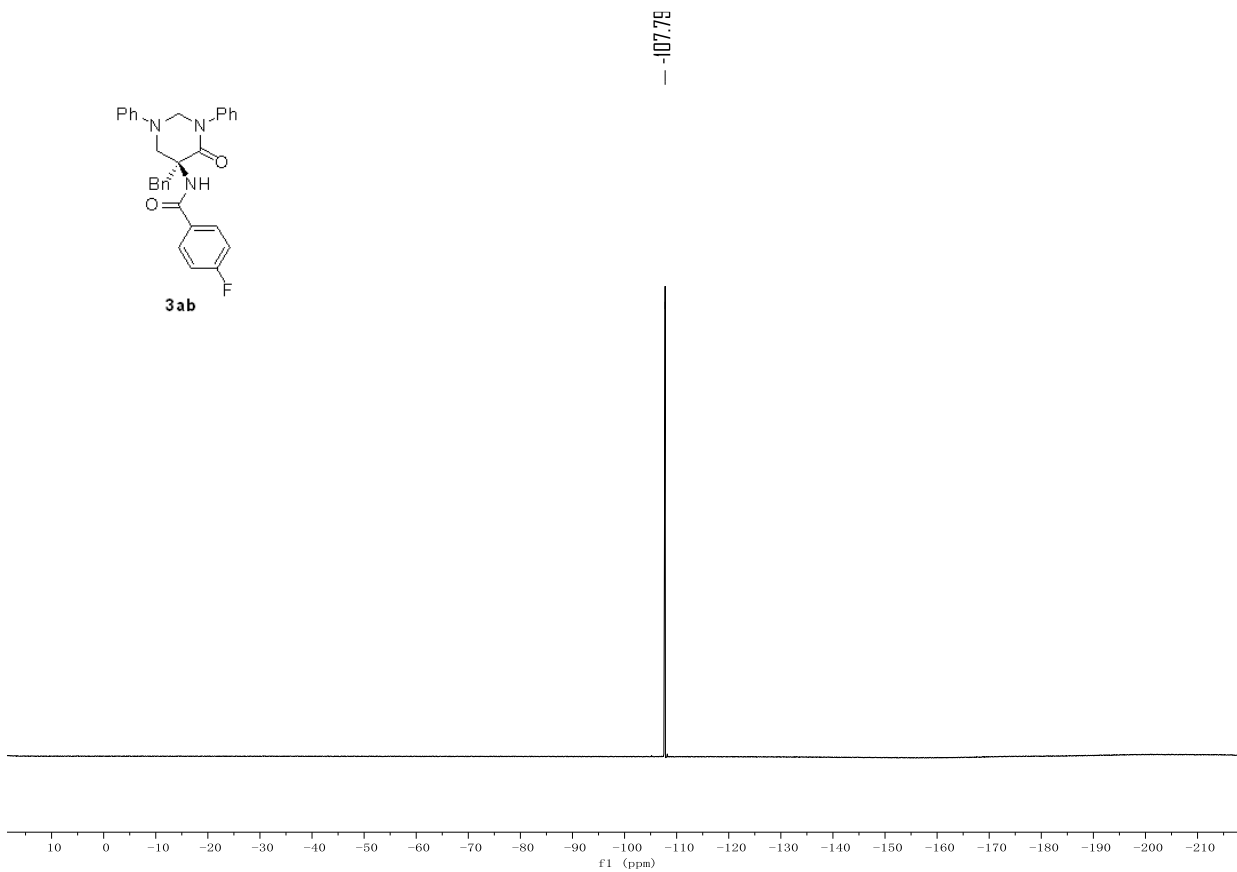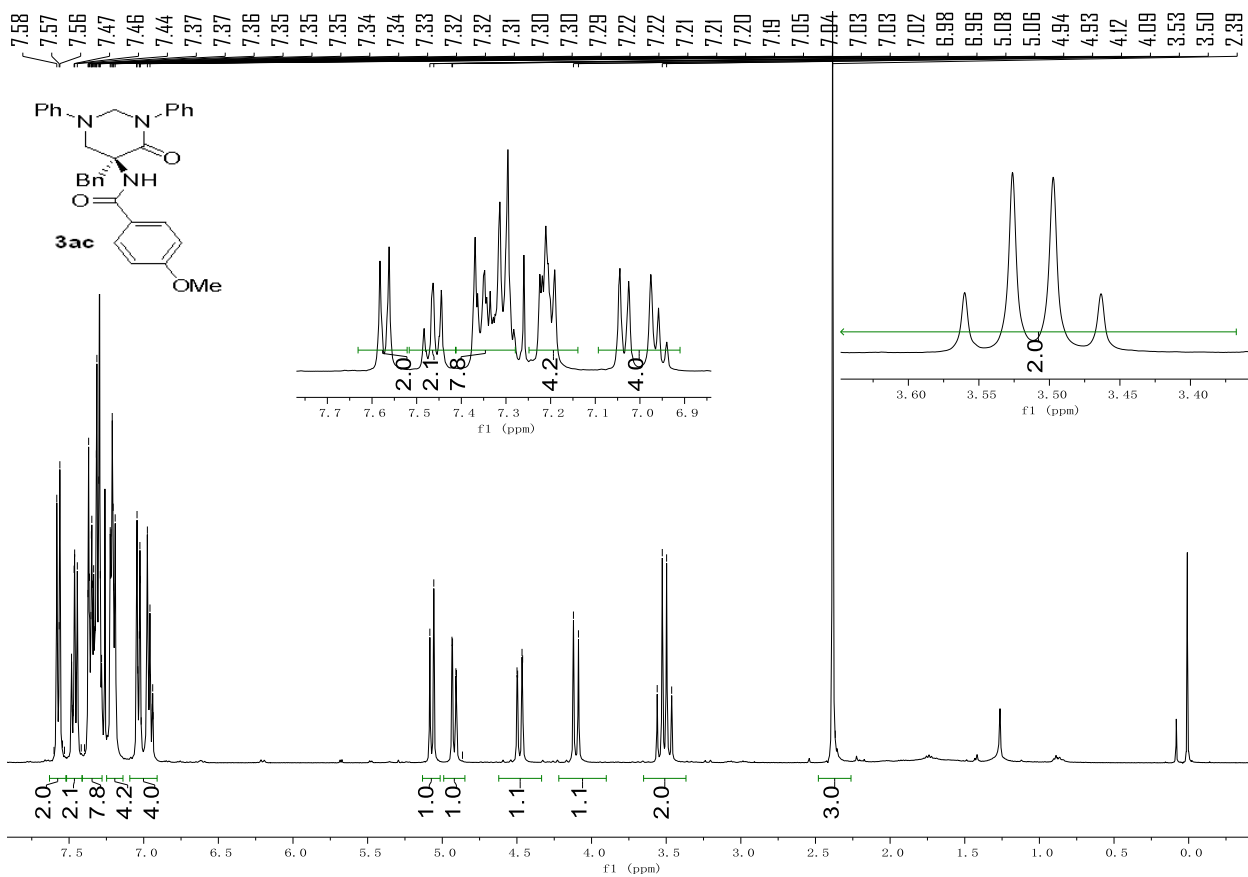



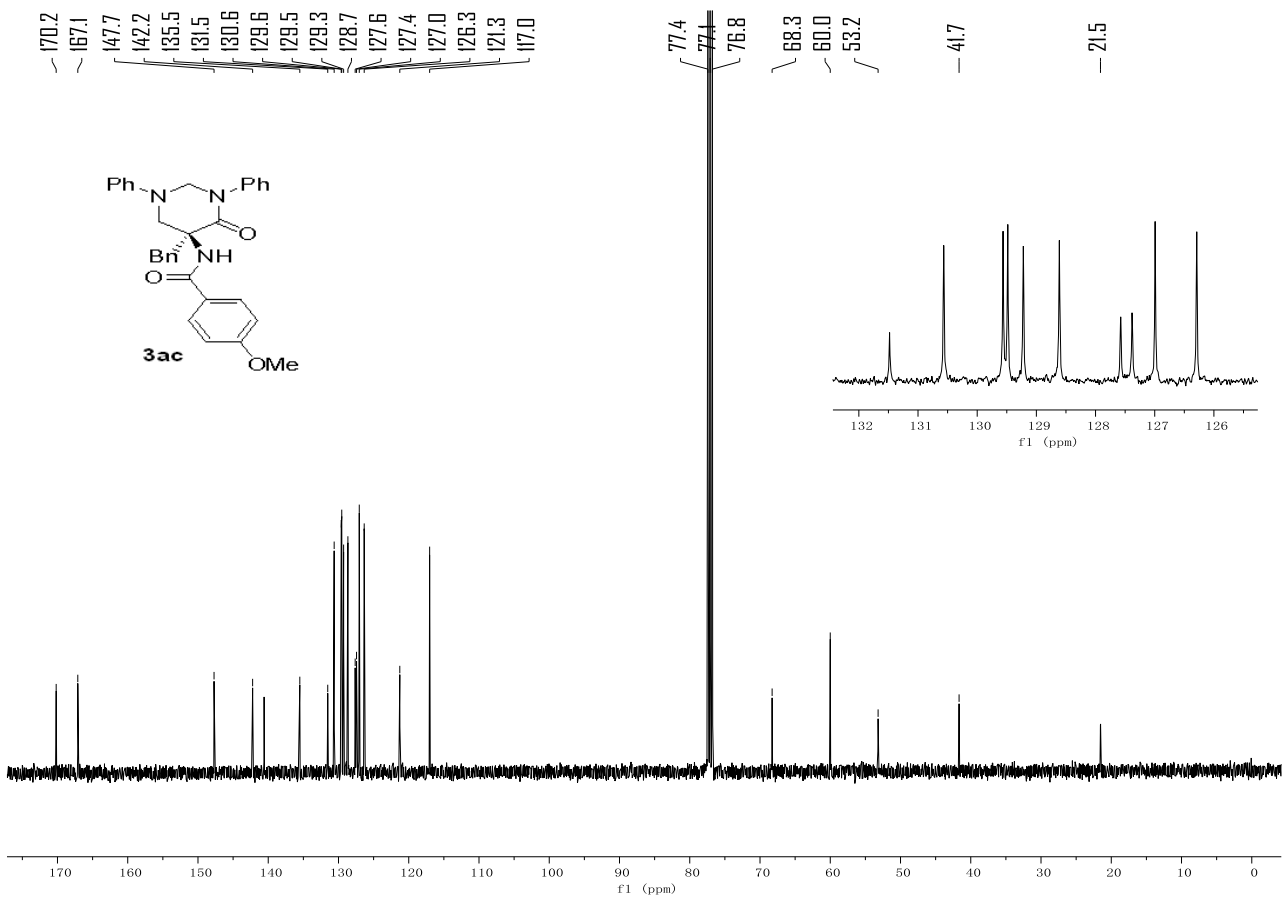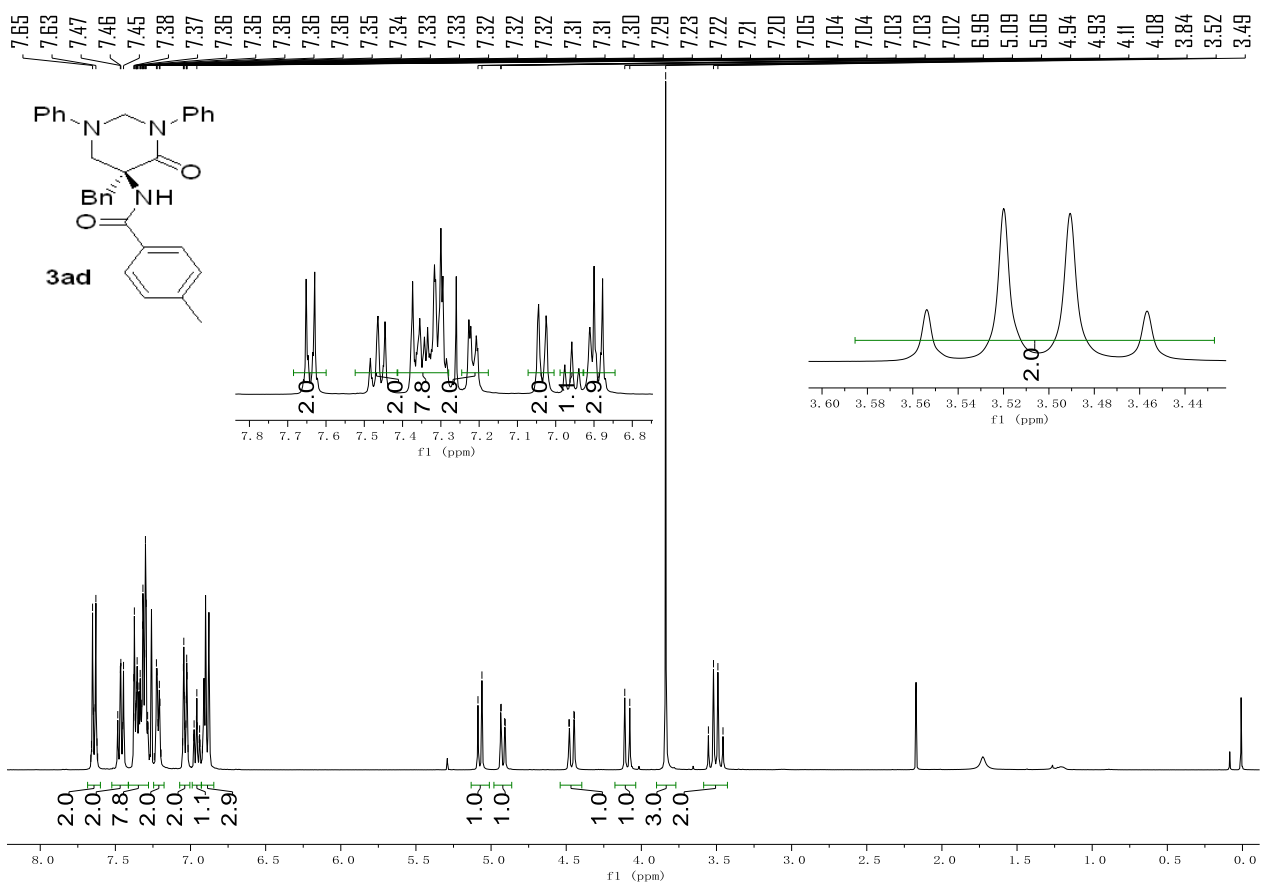

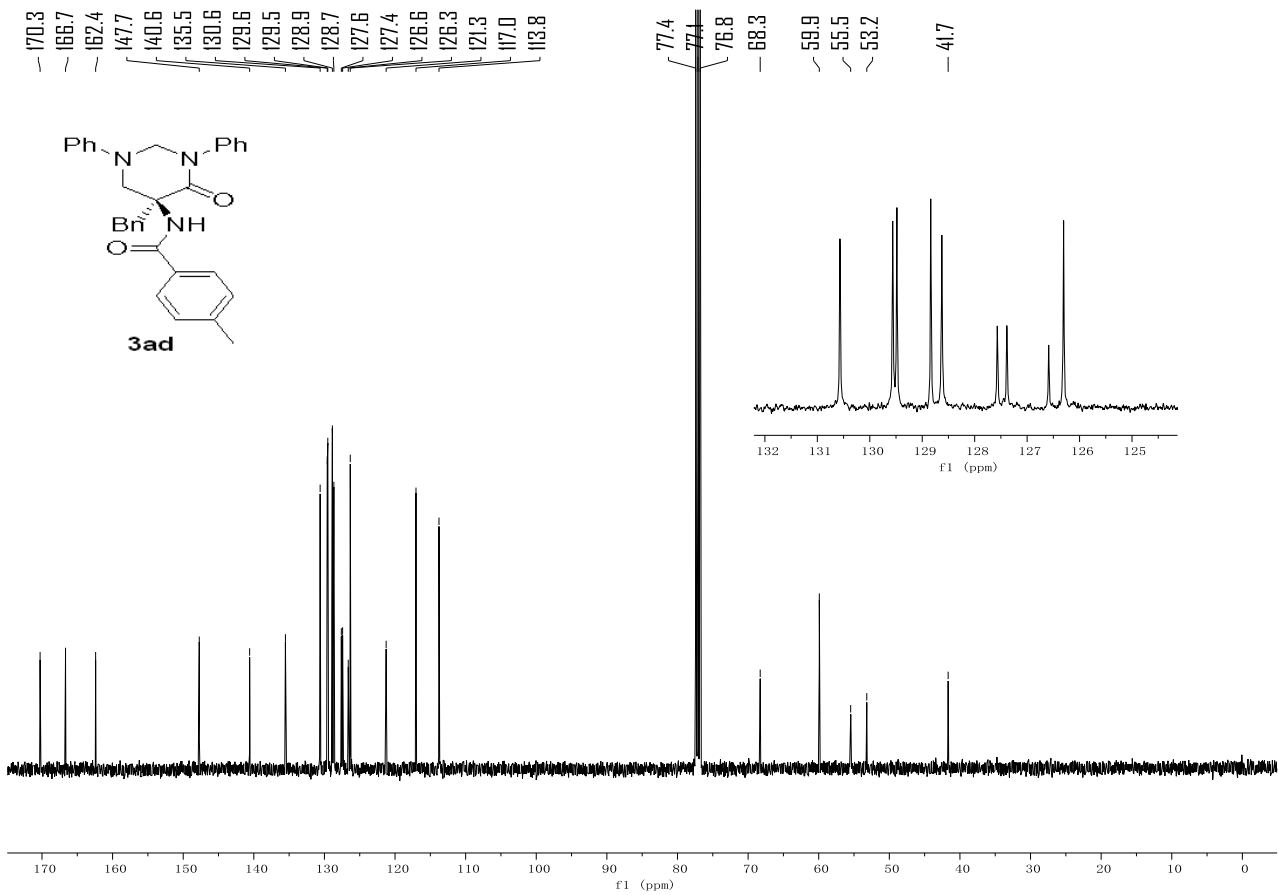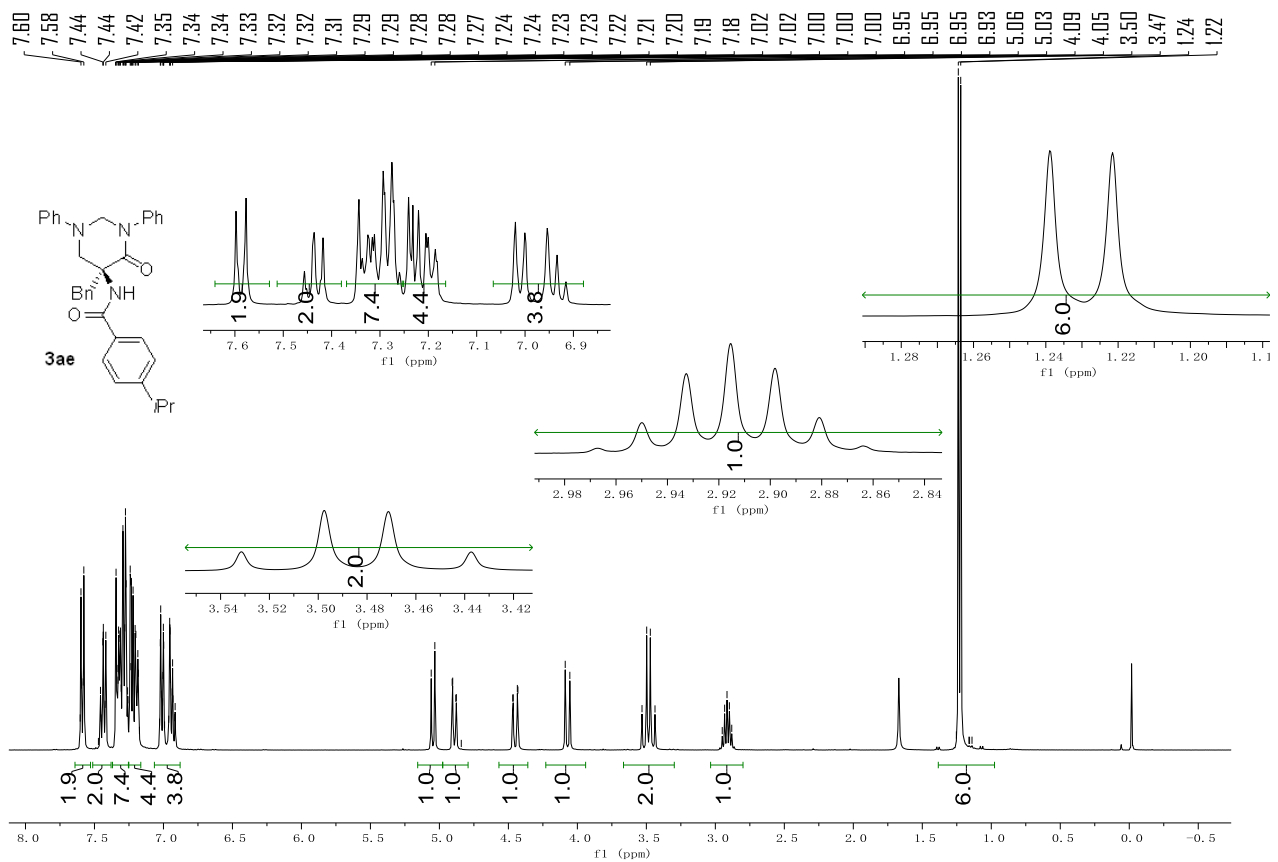

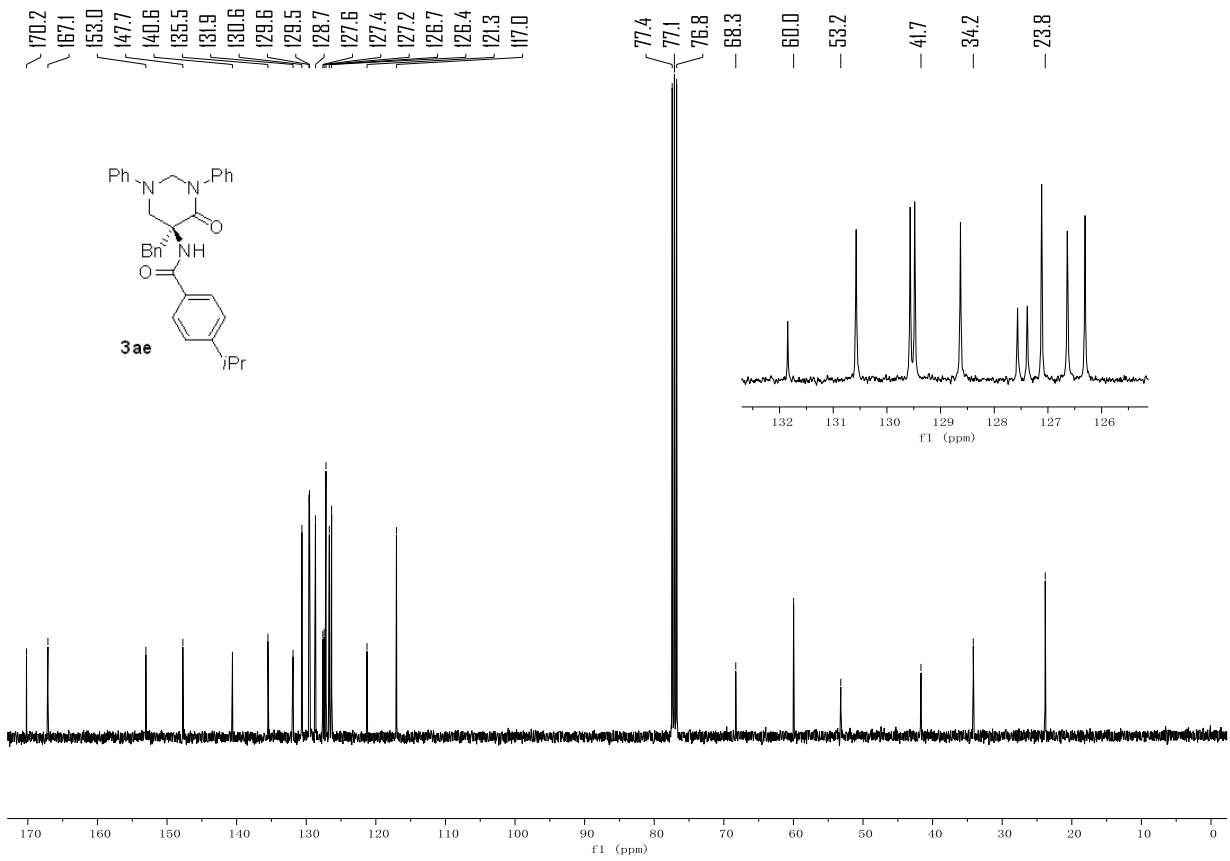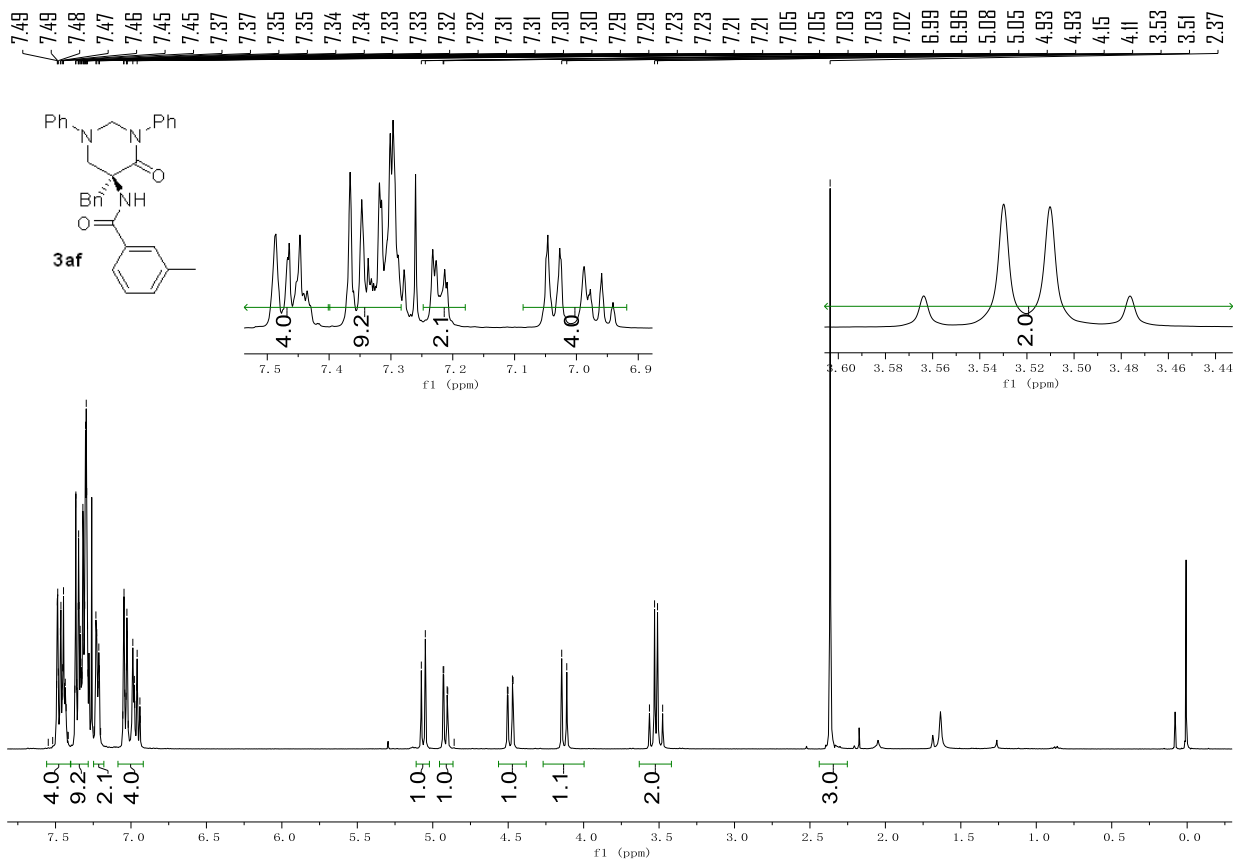

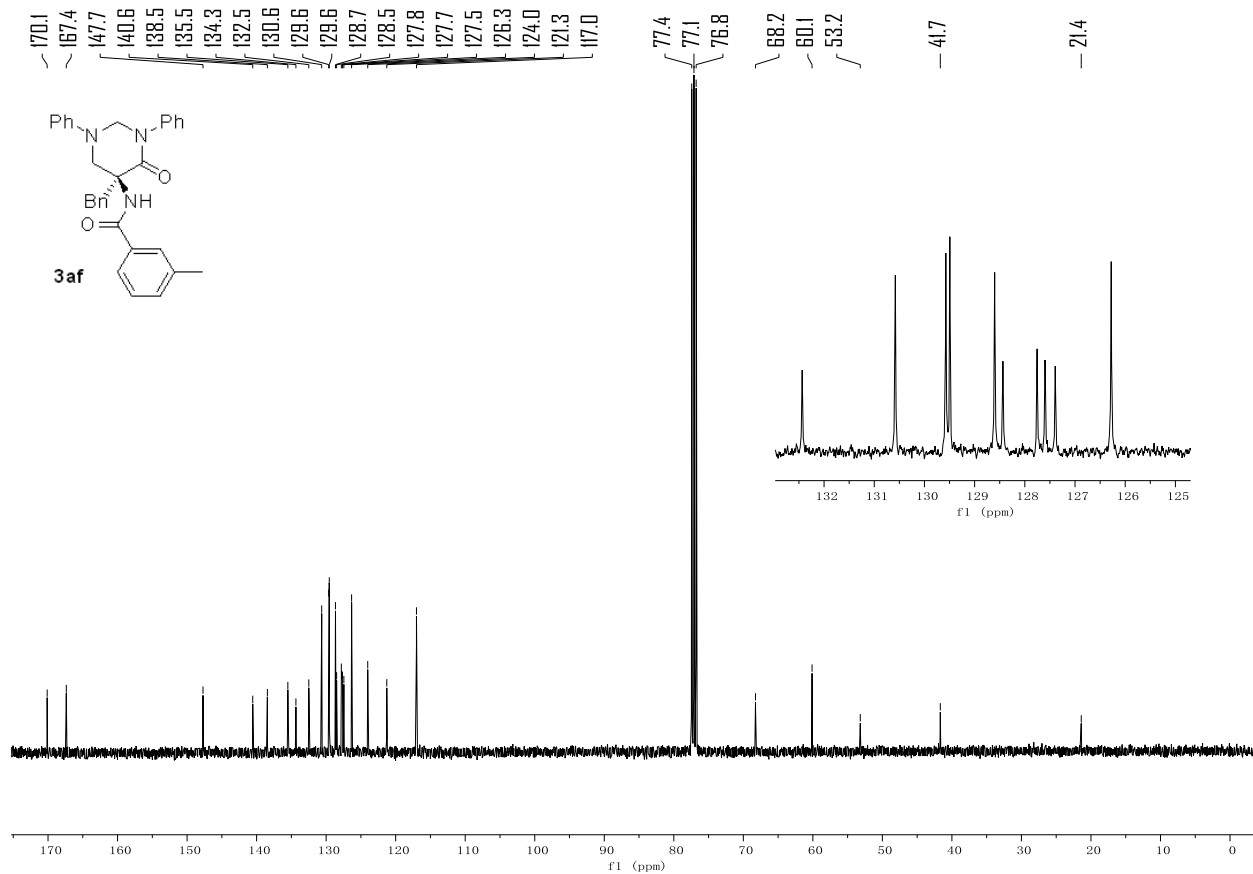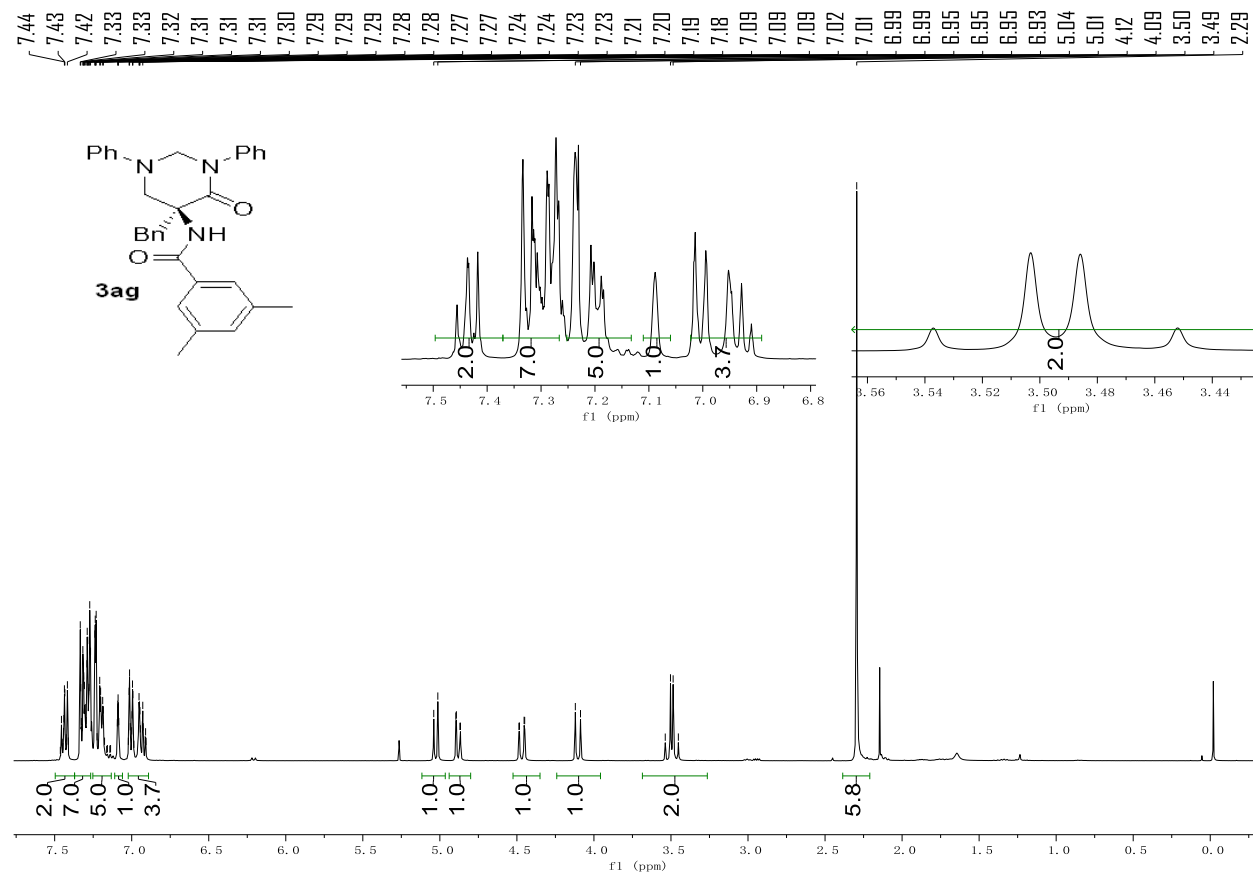

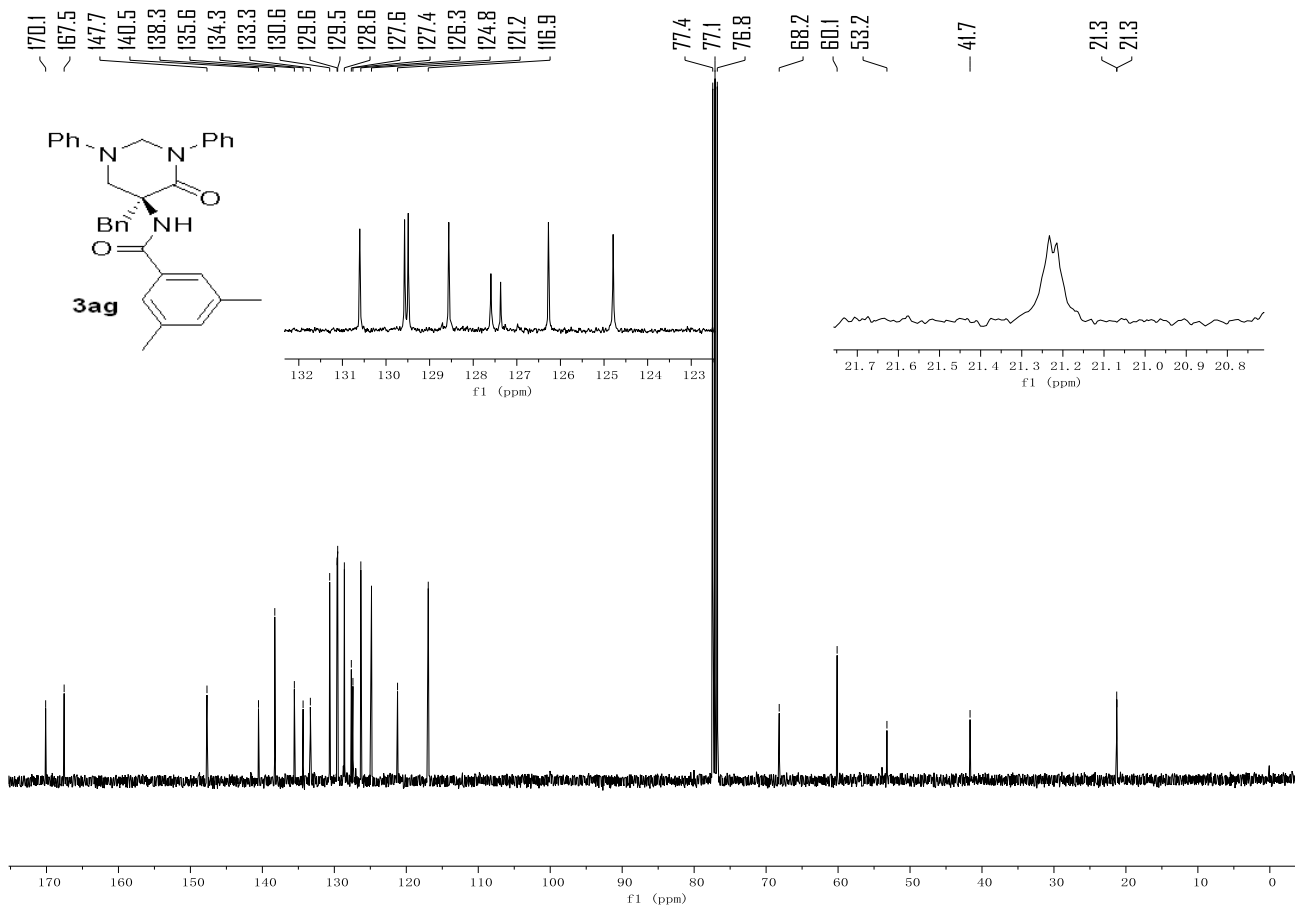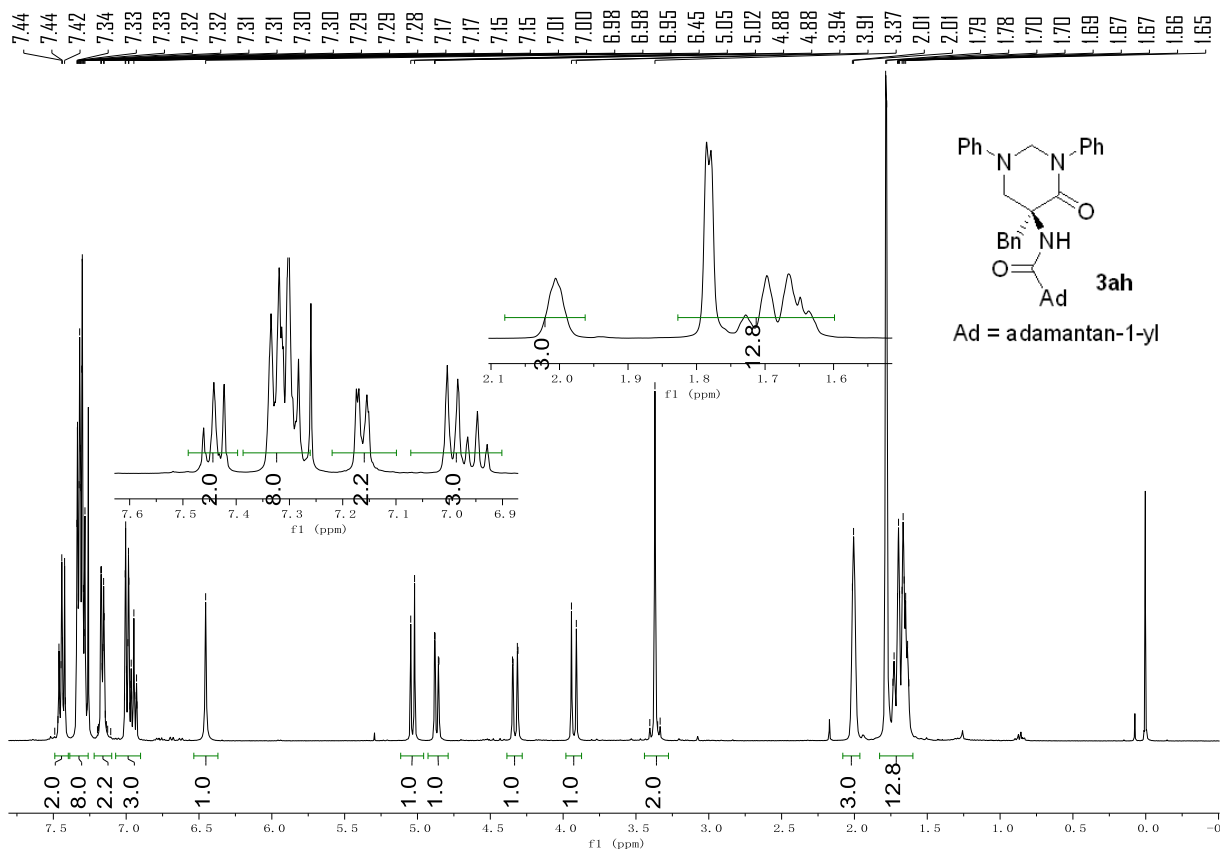

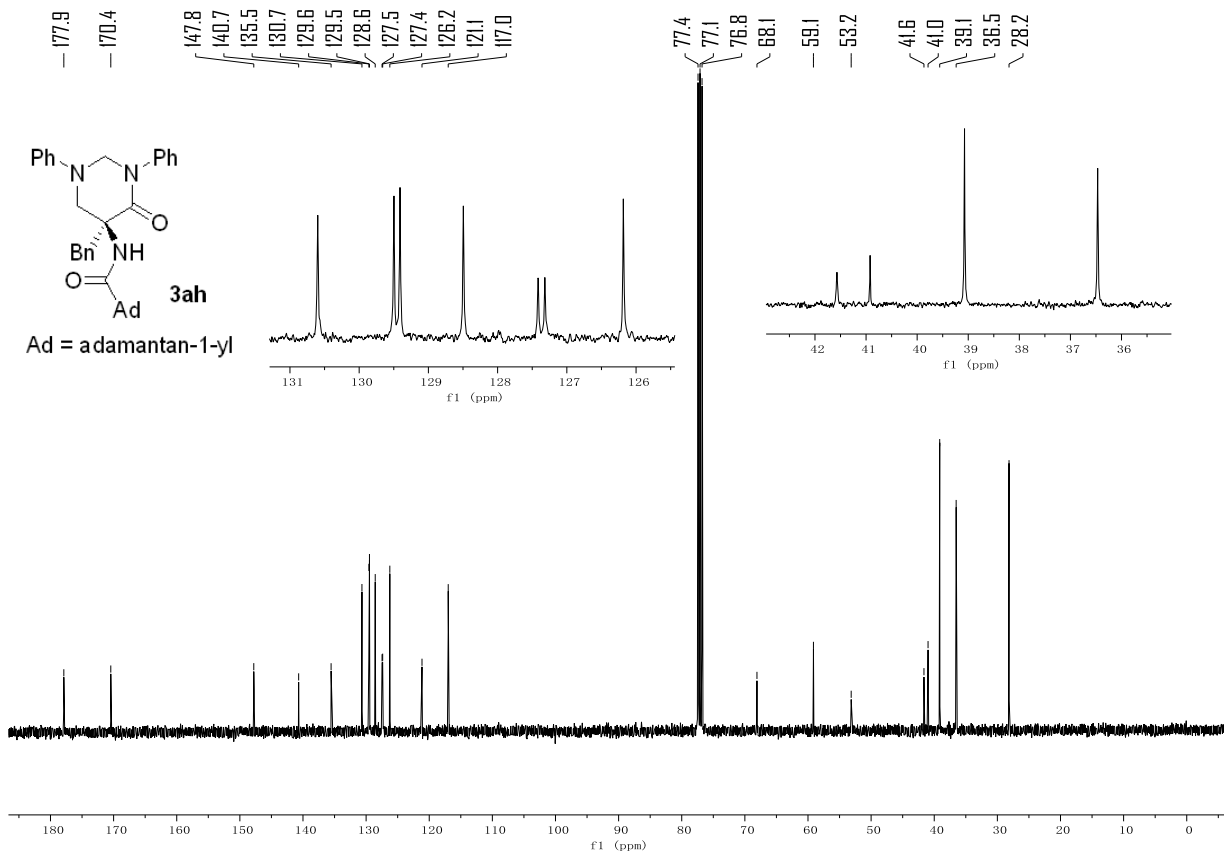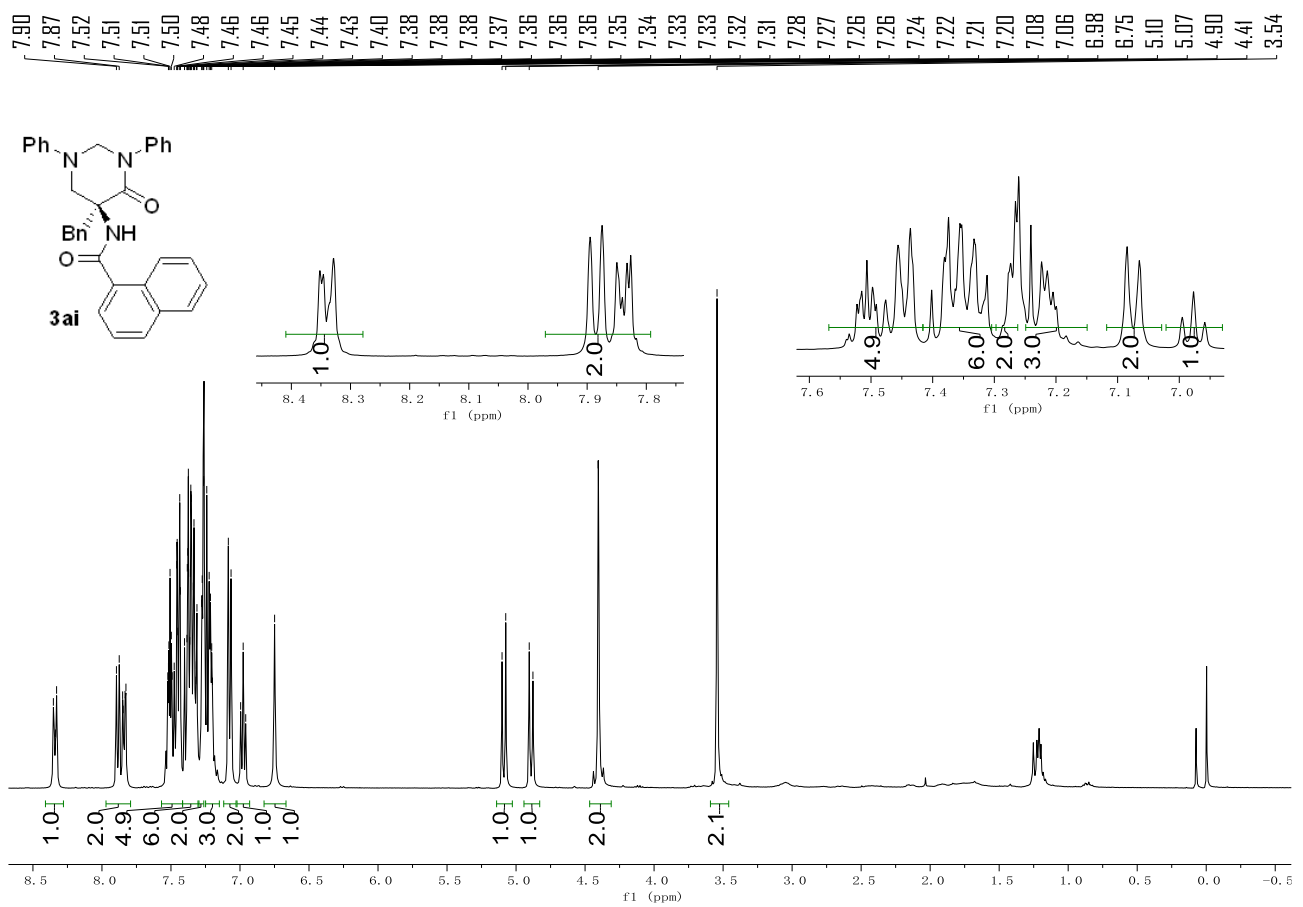

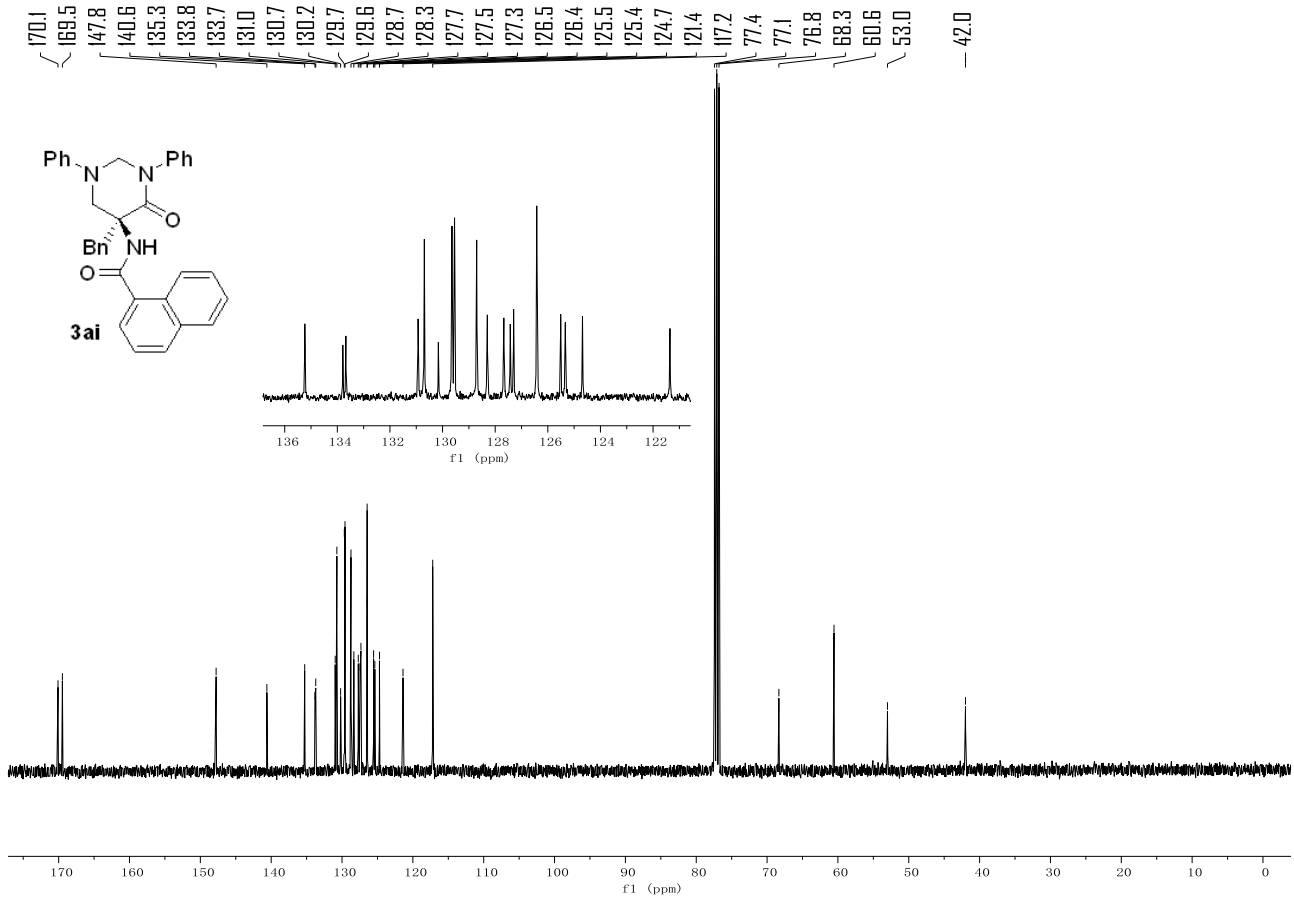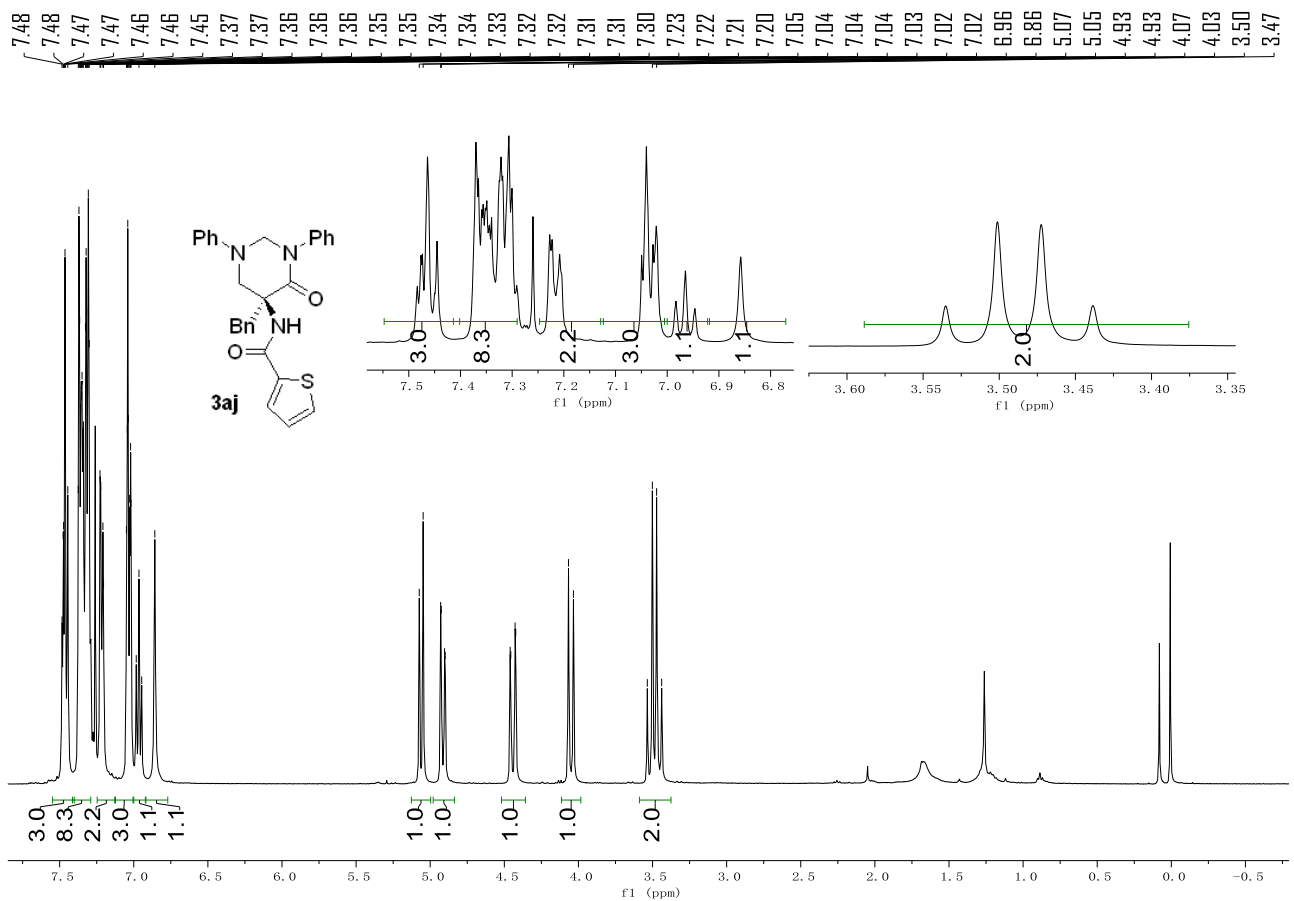

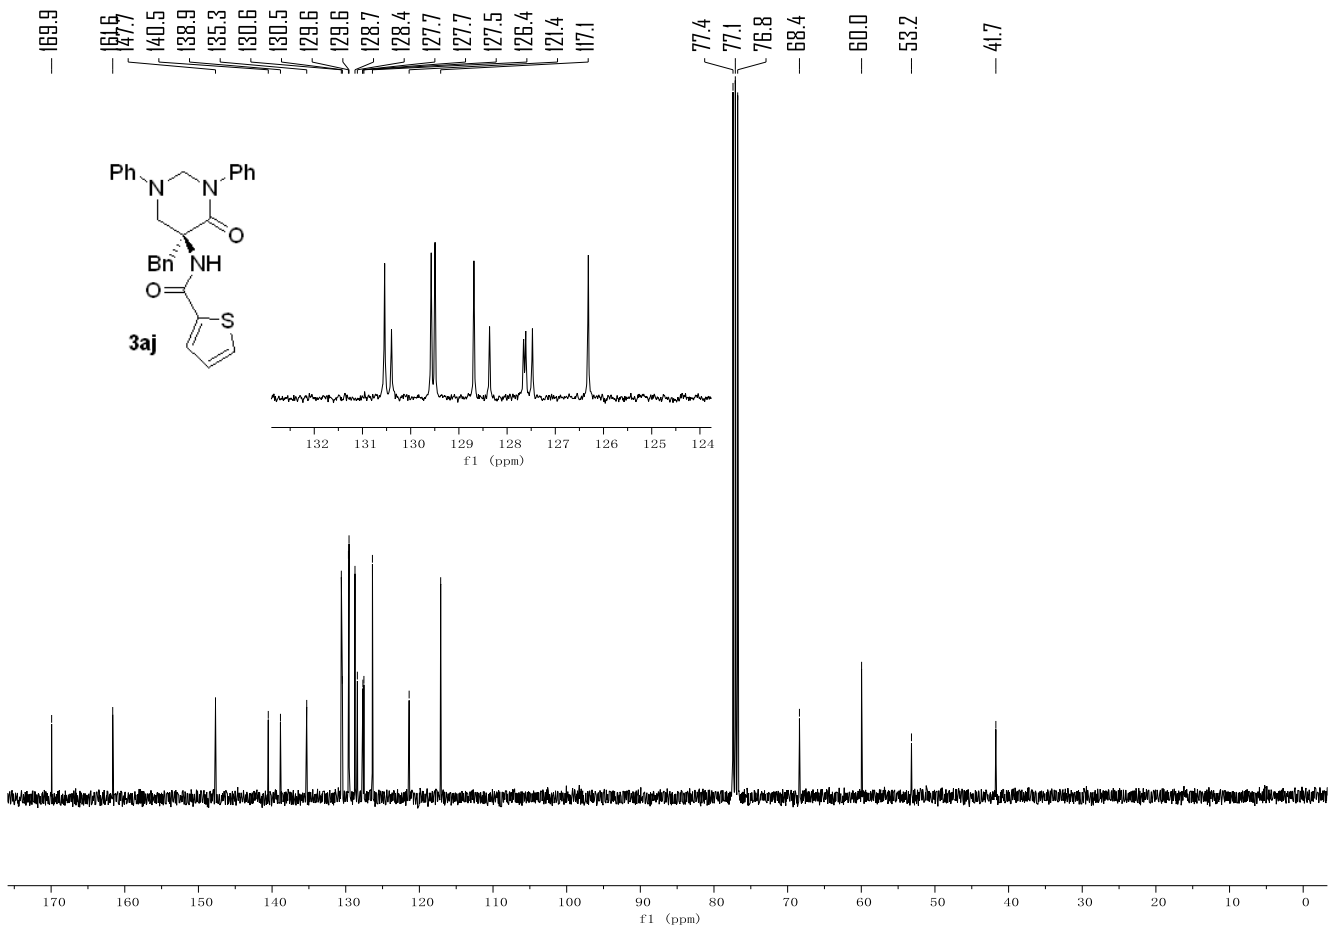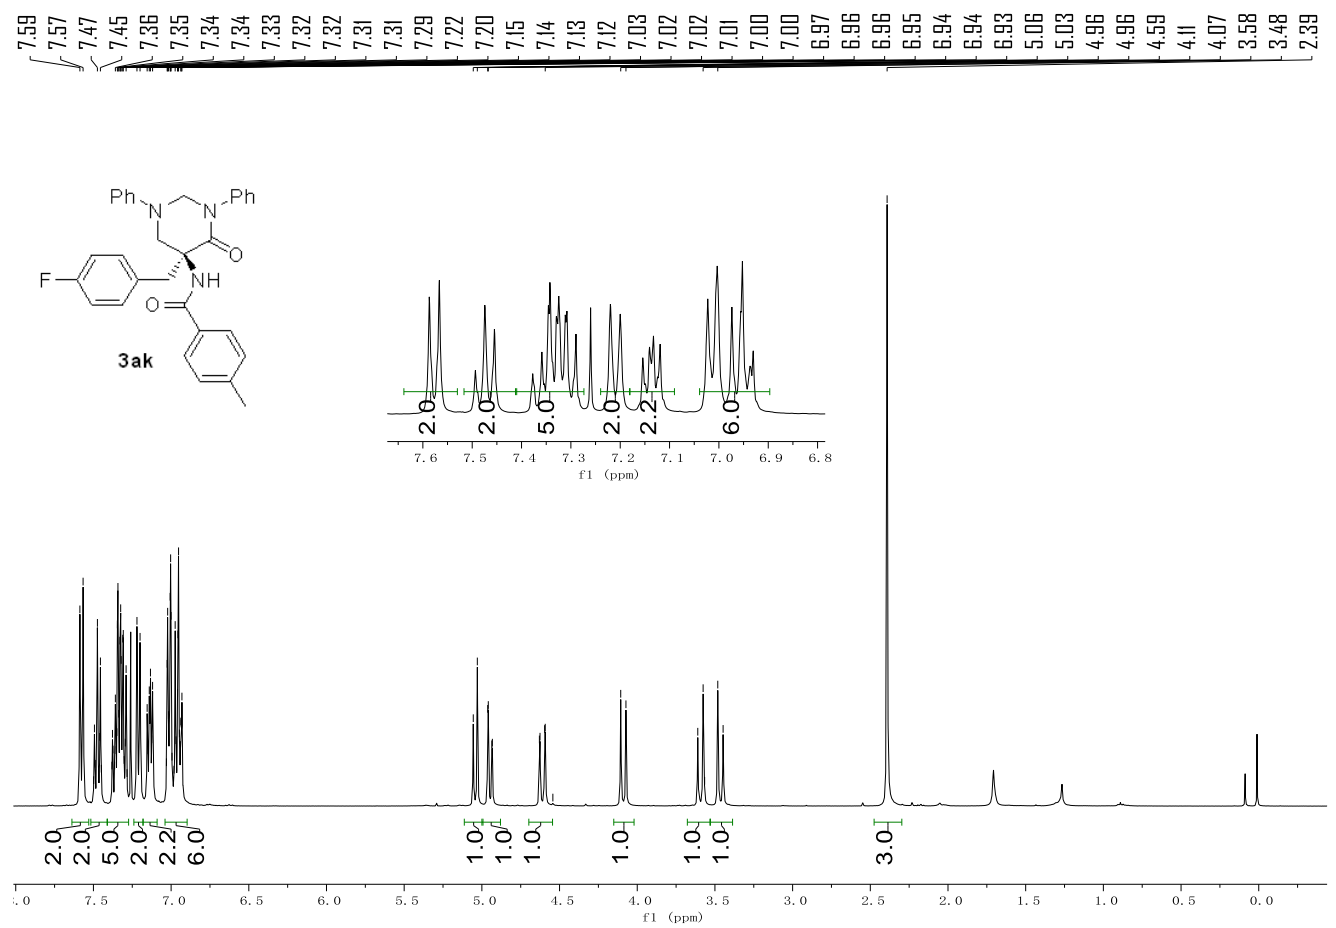



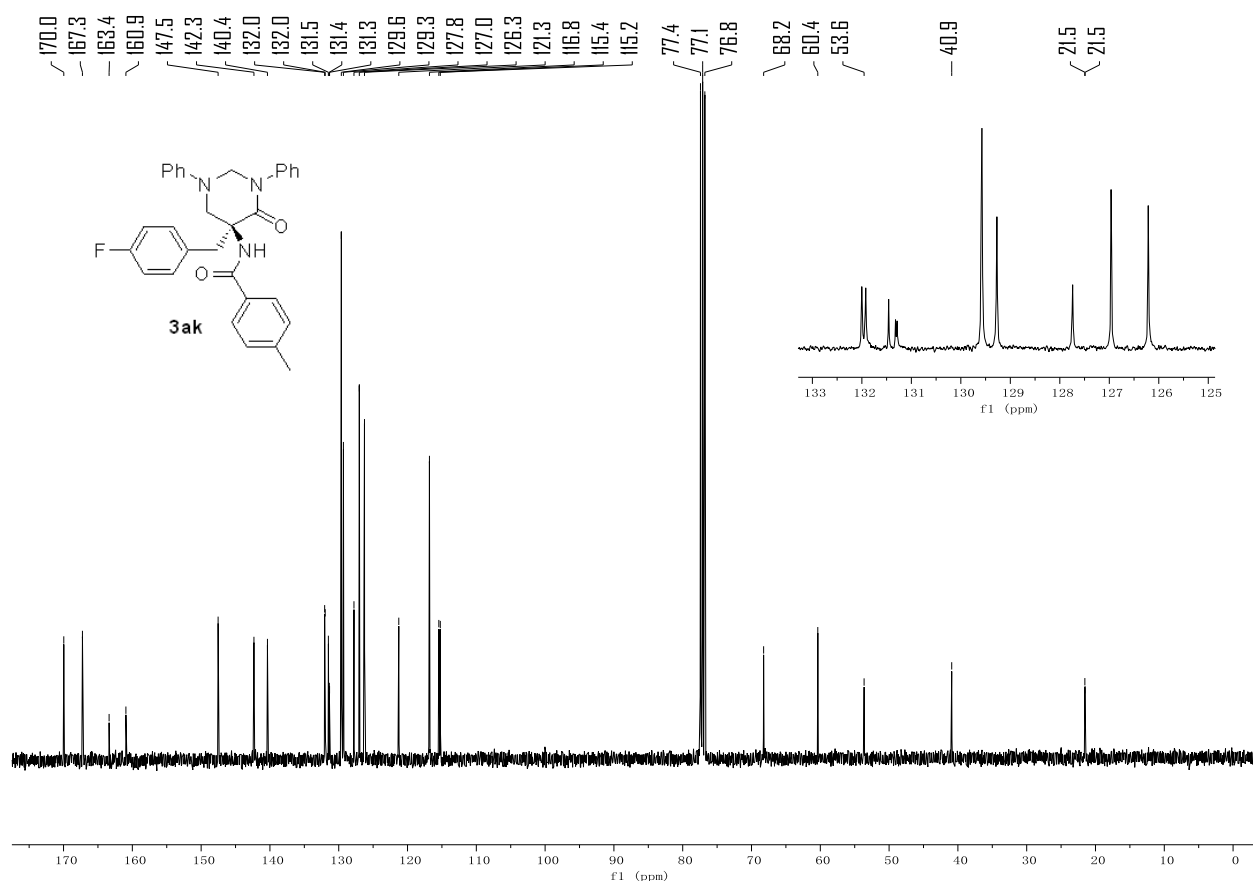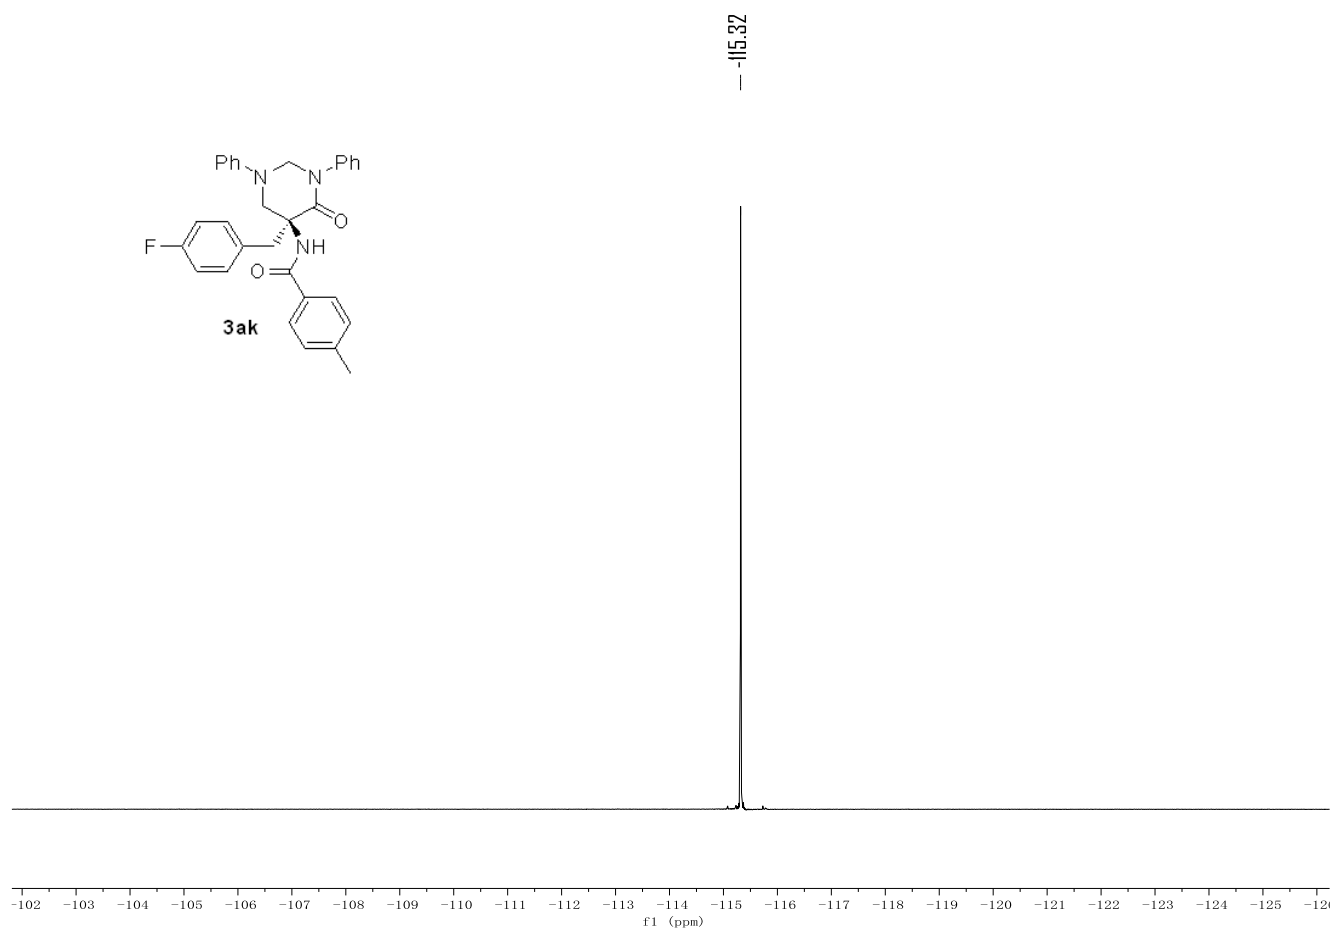

7.59 7.59 7.58 7.57 7.50 7.48 7.46 7.36 7.34 7.34 7.33 7.32 7.32 7.32 7.31 7.31 7.29 7.23 7.23 7.22 7.22 7.21 7.21 7.20 7.11 7.10 7.08 7.01 7.01 7.01 6.99 5.05 5.02 4.97 4.97 4.09 4.05 3.63 3.59 3.47 3.44 2.39

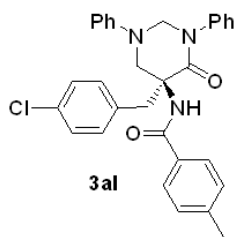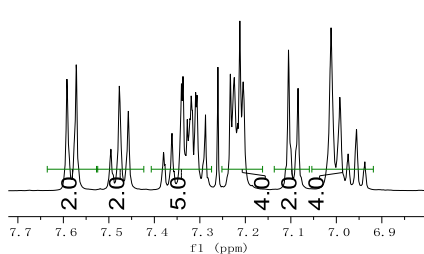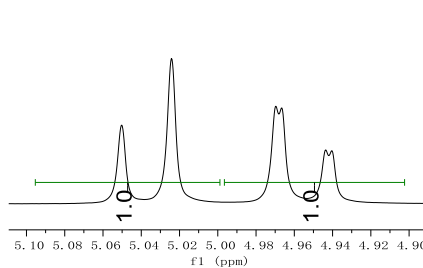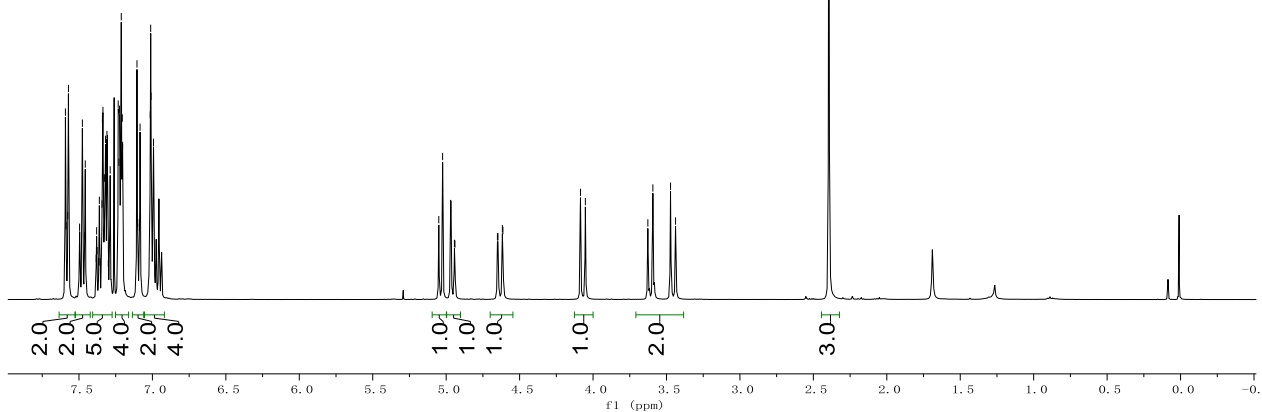

169.8 167.3 147.5 142.4 140.3 134.1 133.2 131.8 131.5 129.6 129.3 128.6 127.8 127.0 126.2 121.3 116.8

77.4 77.1 76.8 68.3 60.4 53.7 41.0 21.6

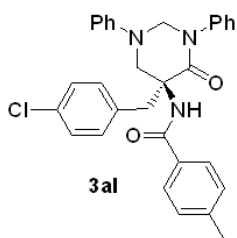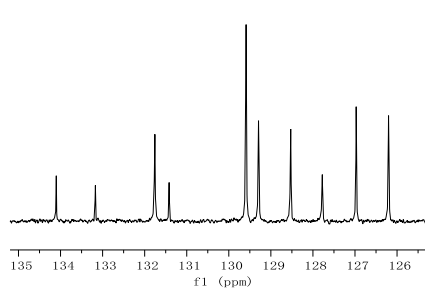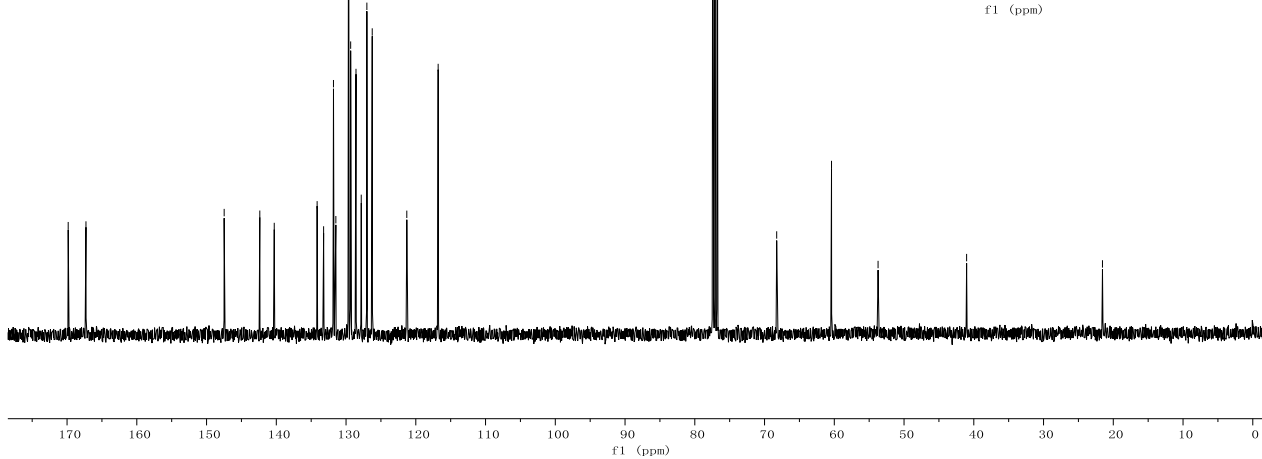

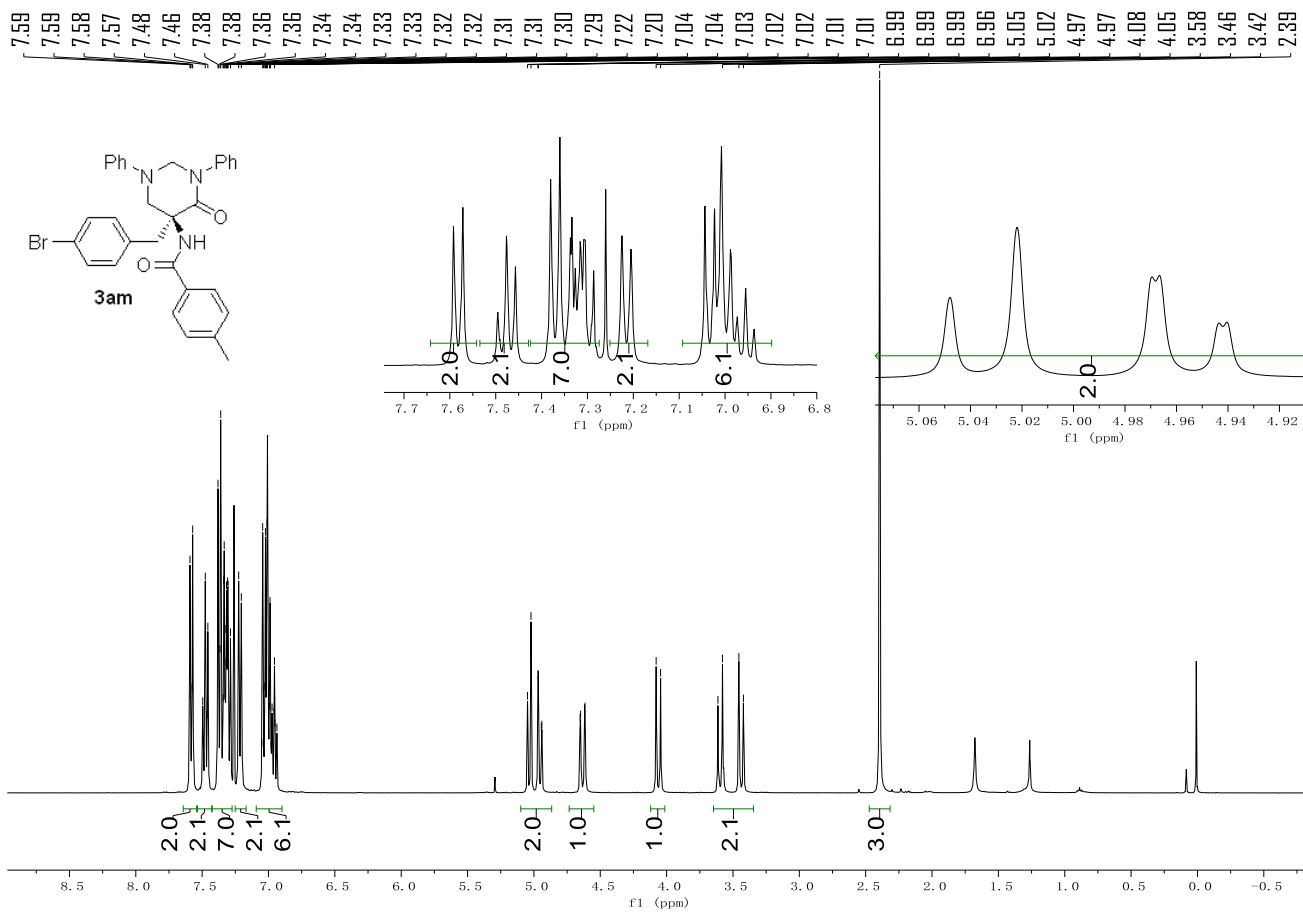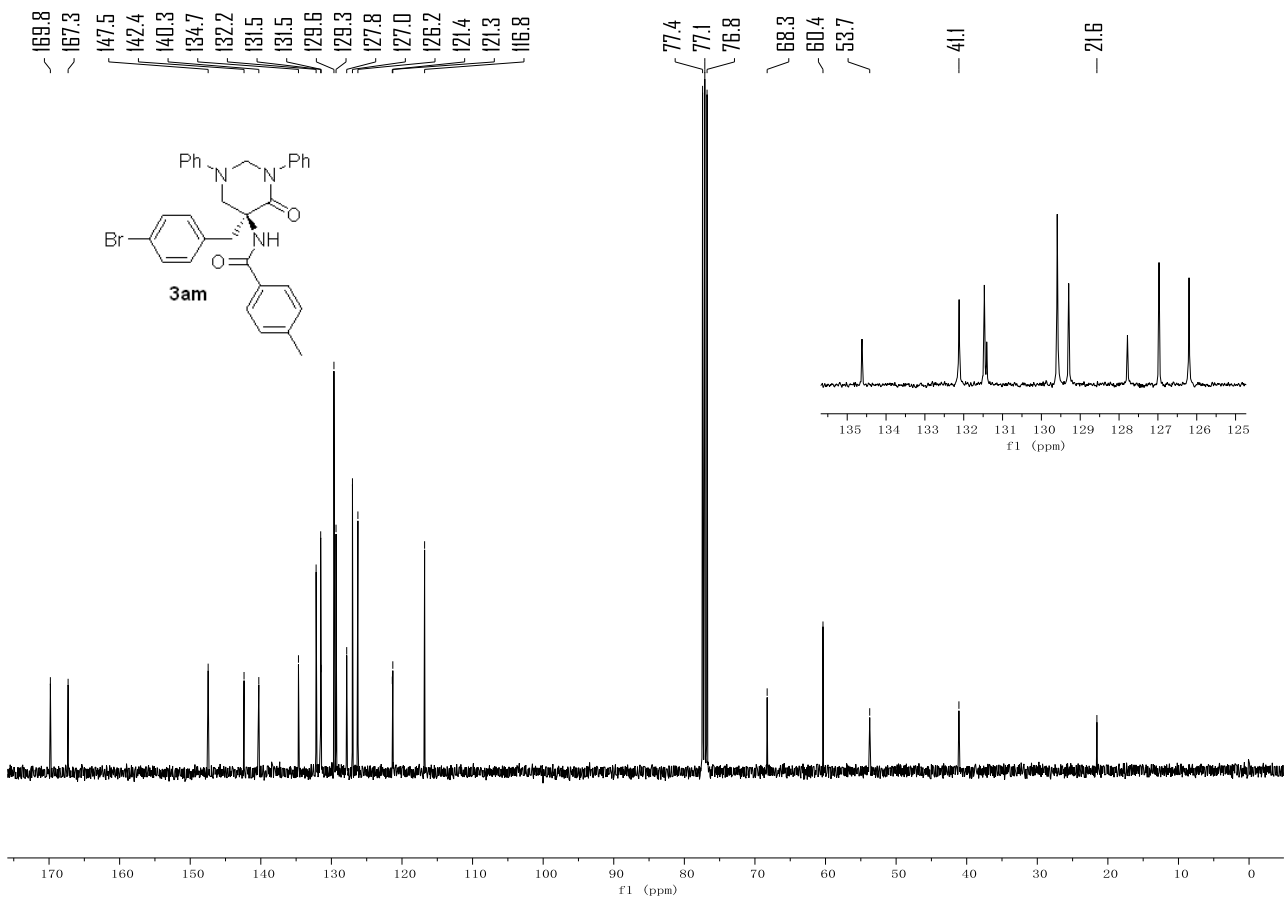

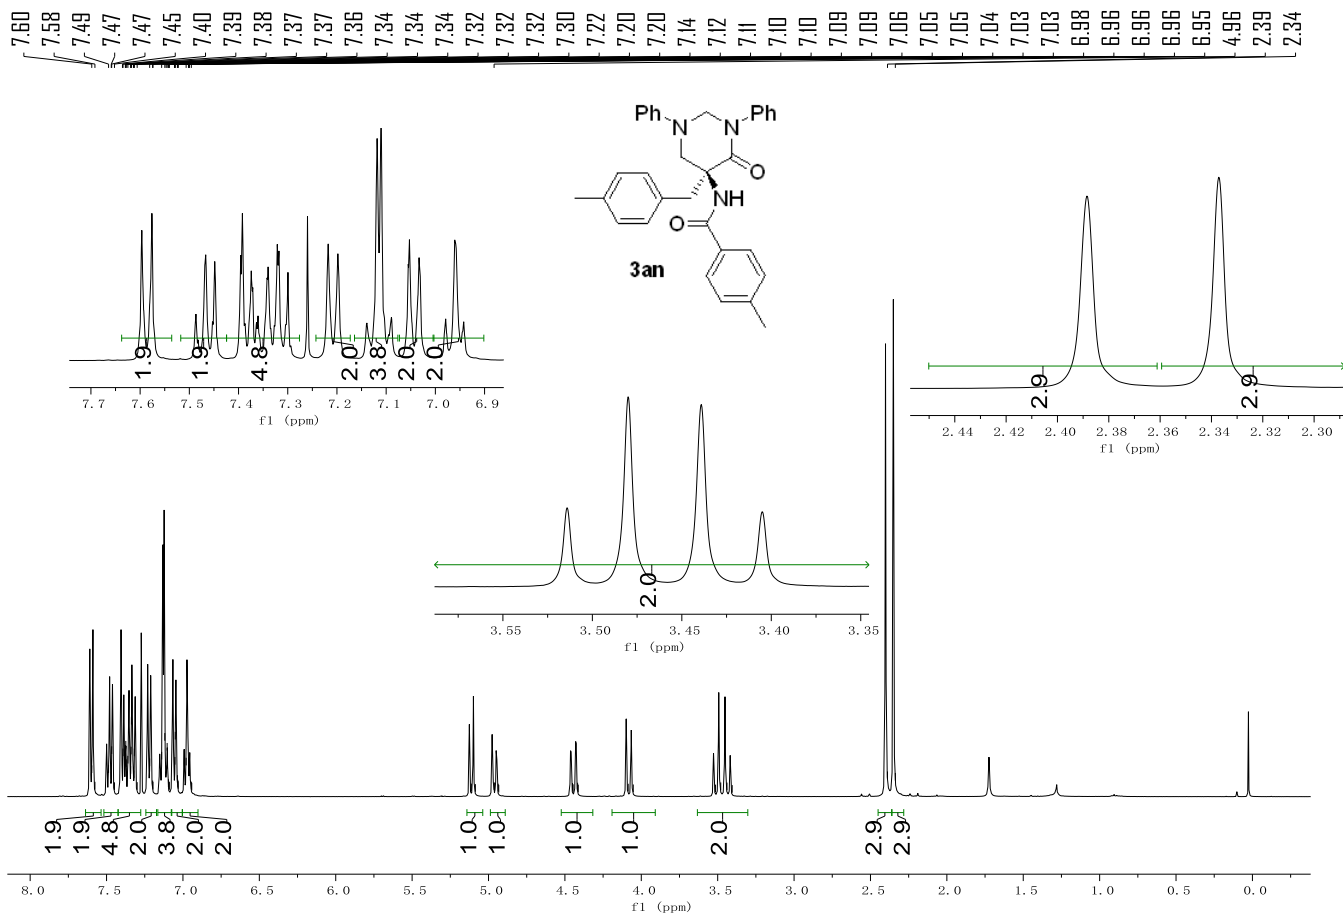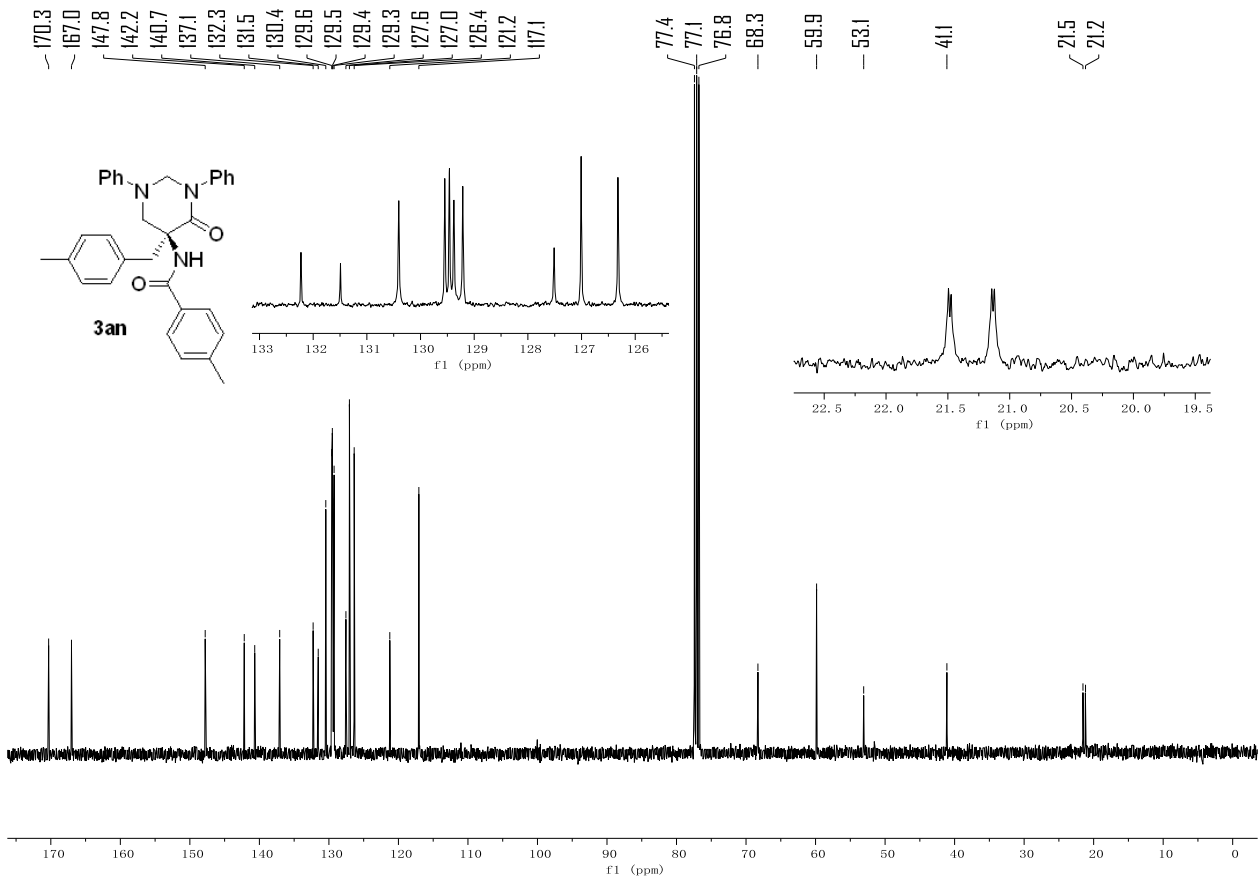



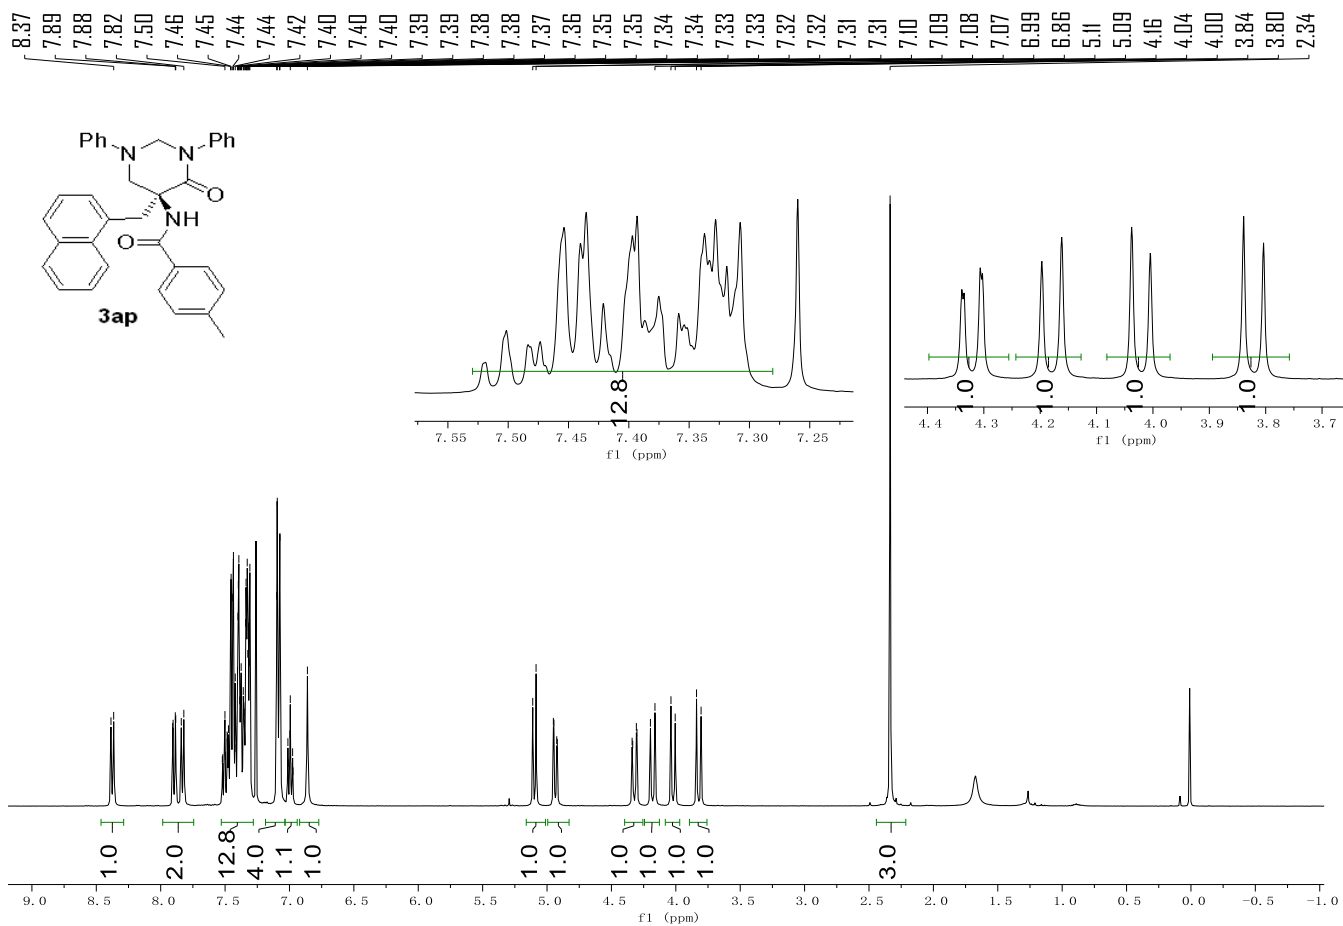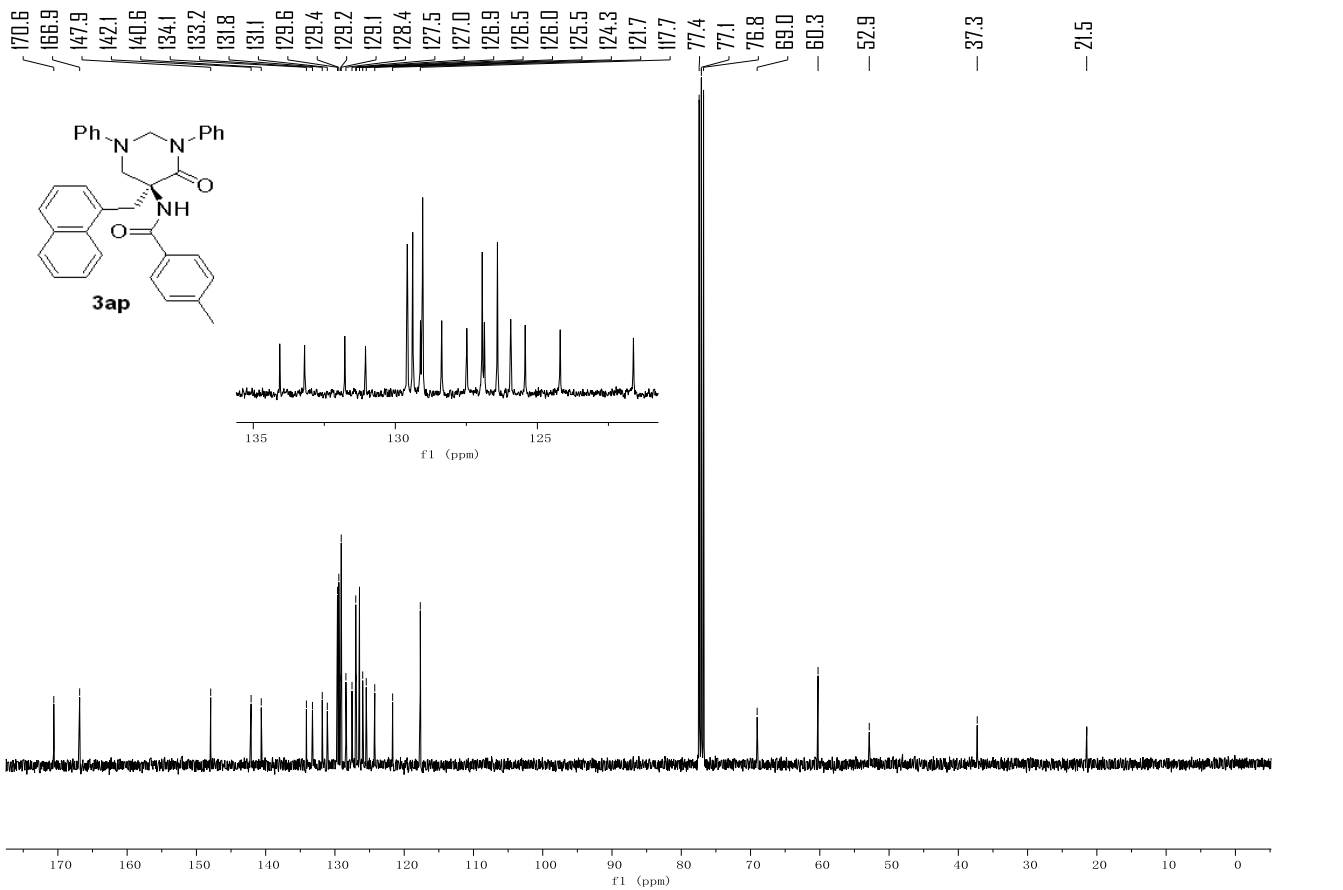



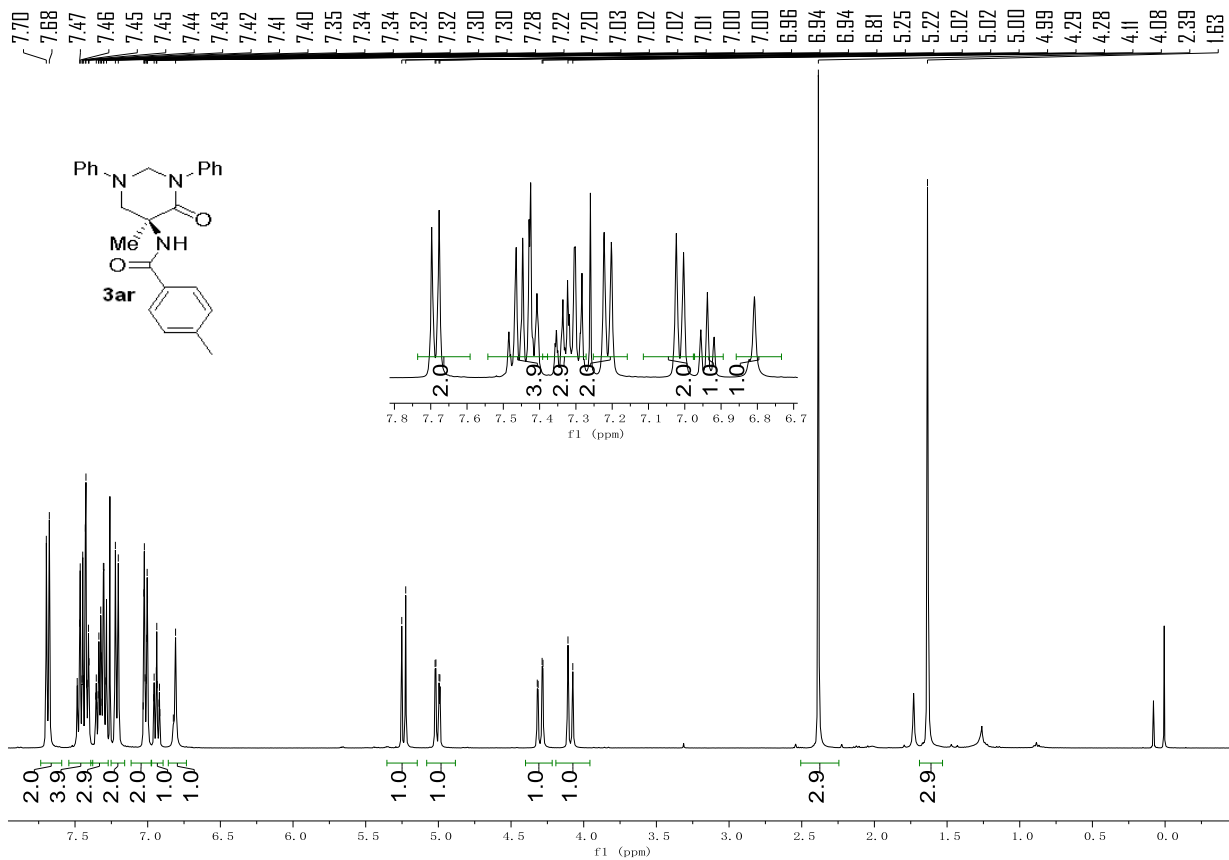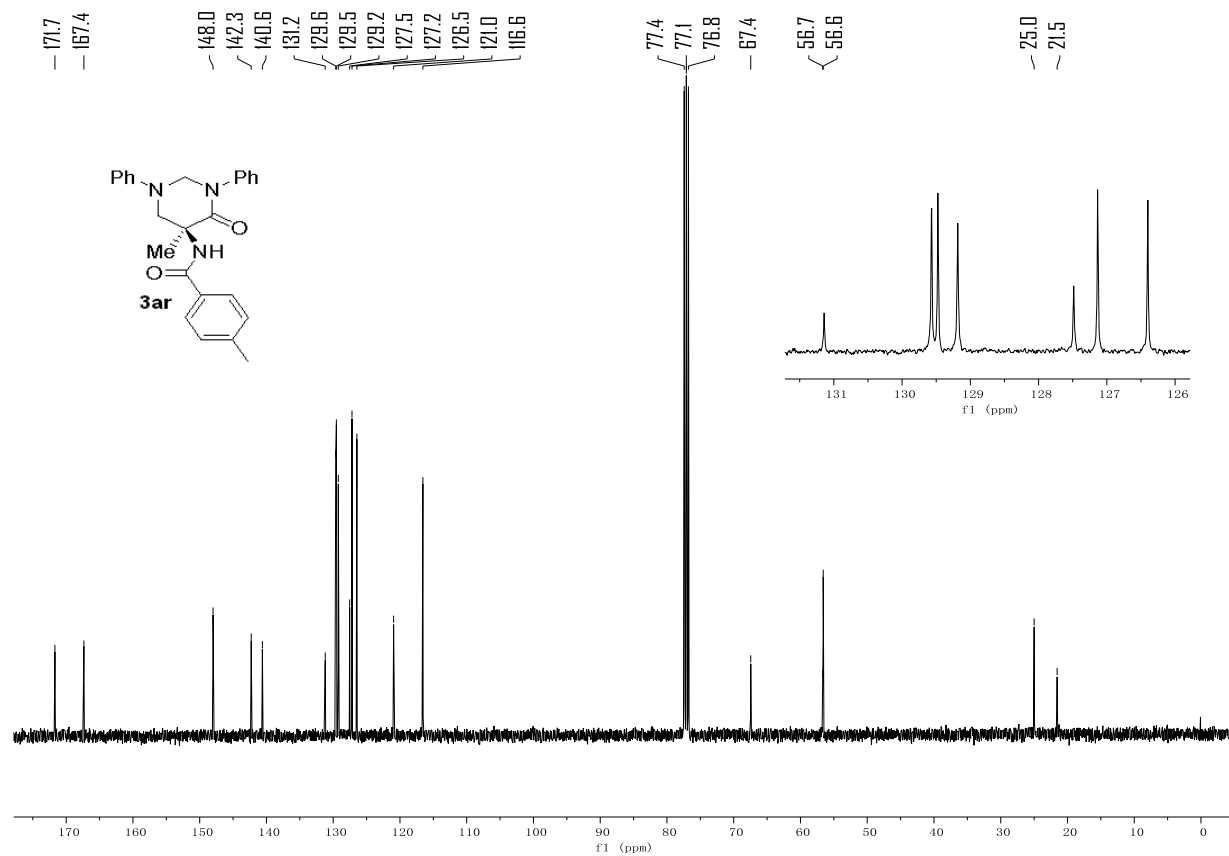



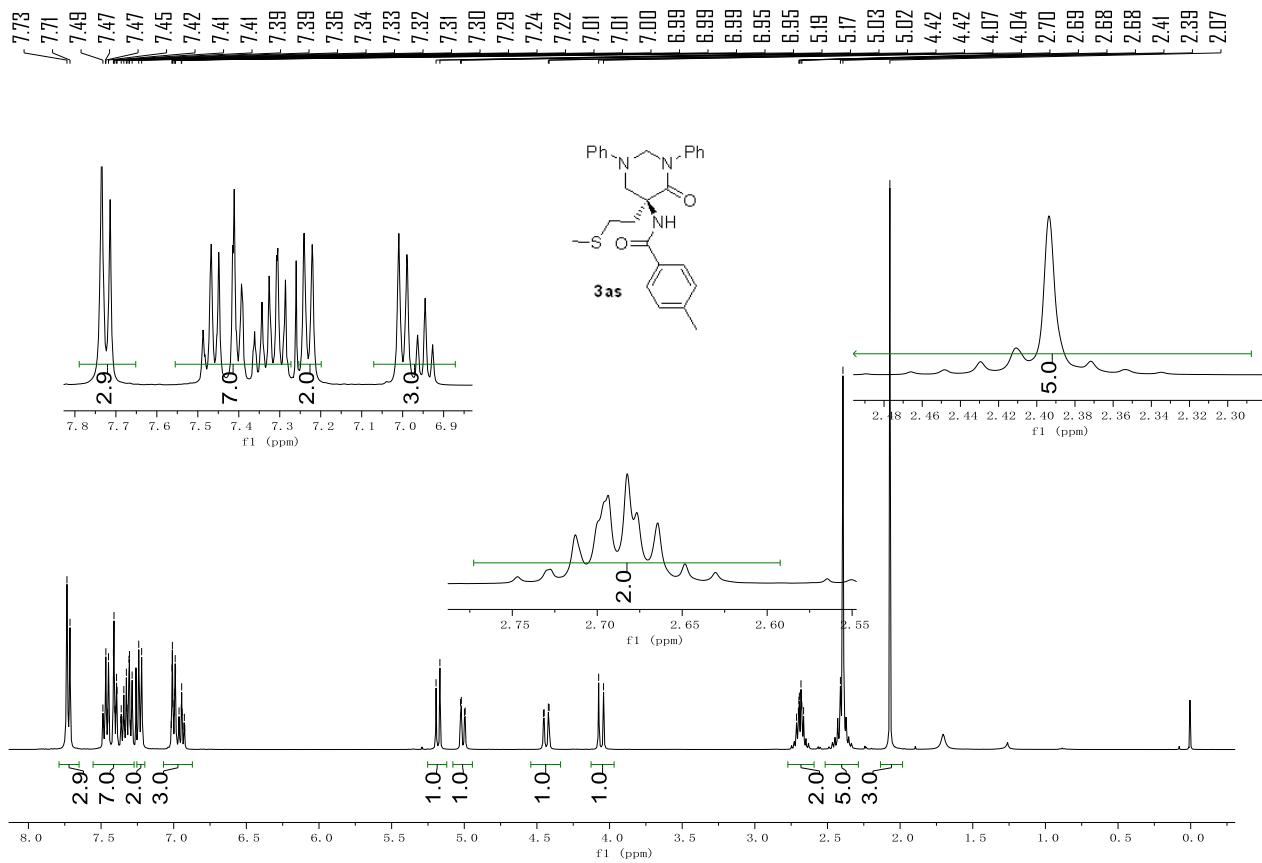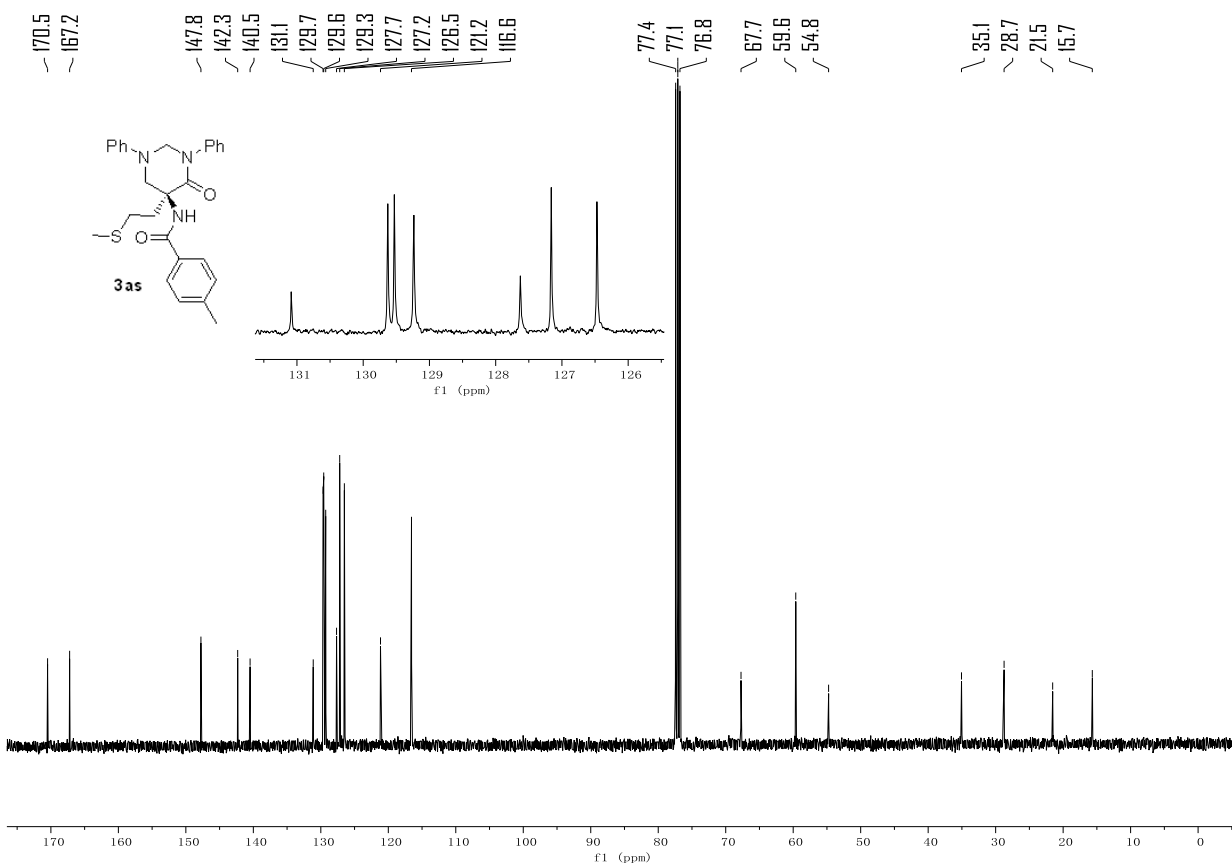

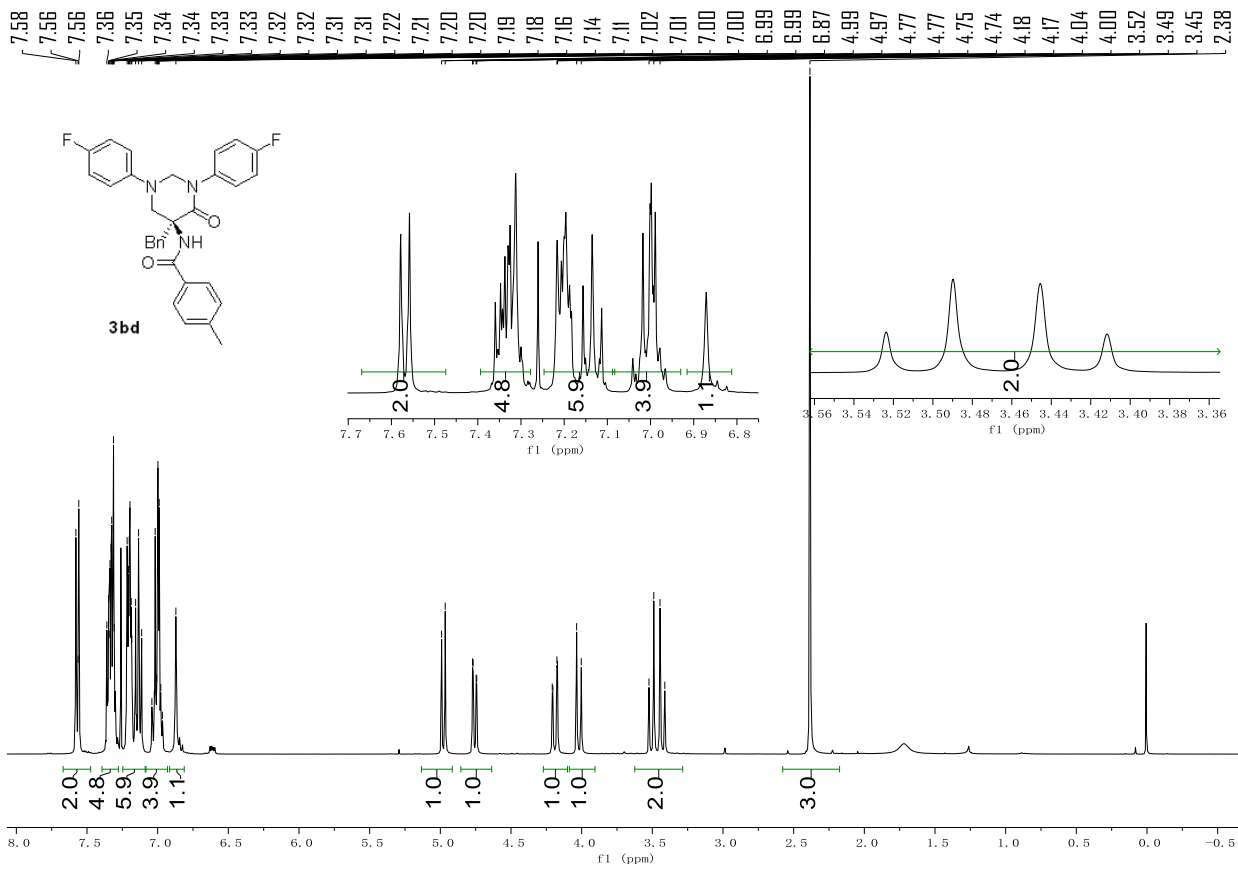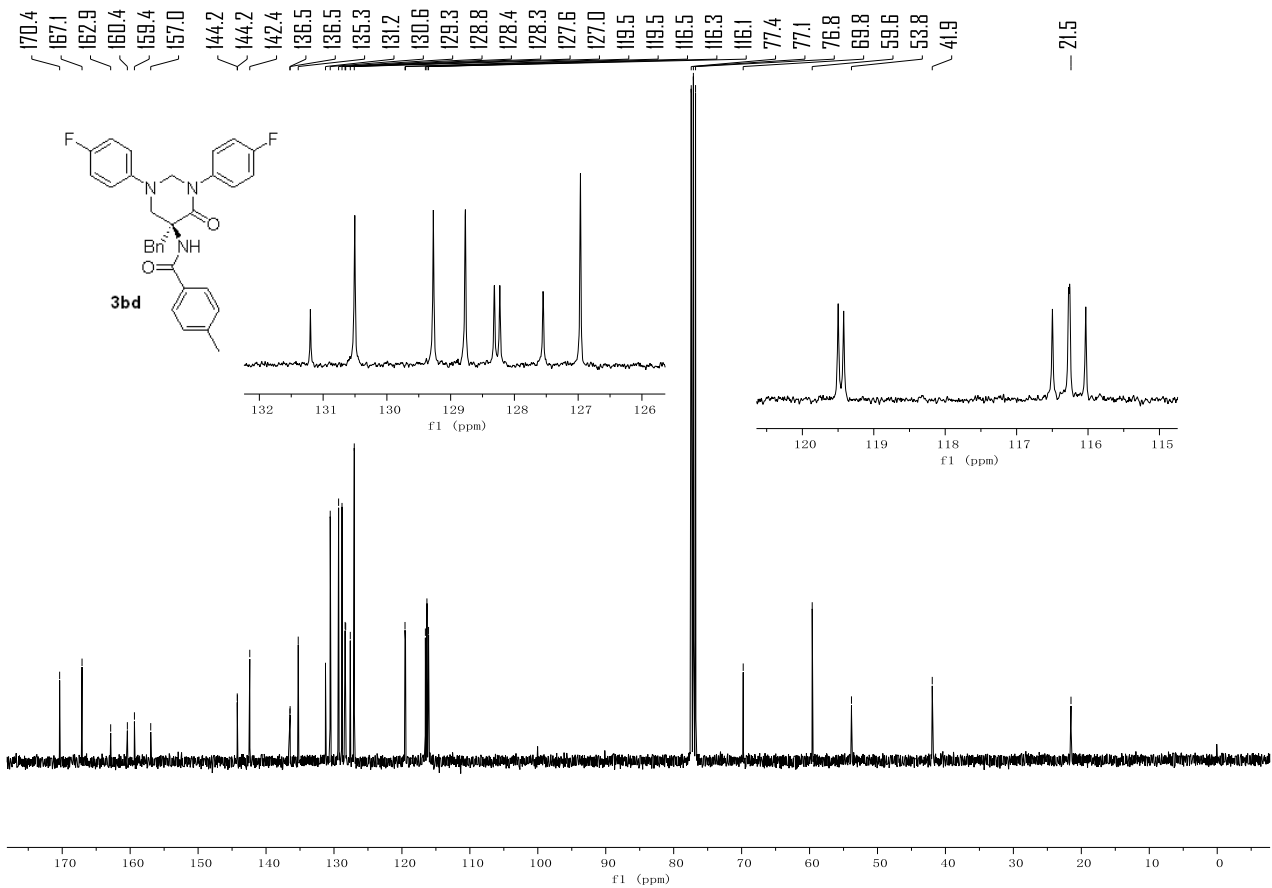

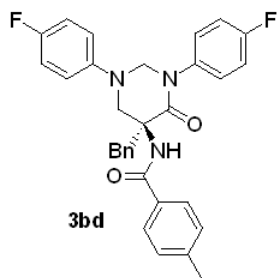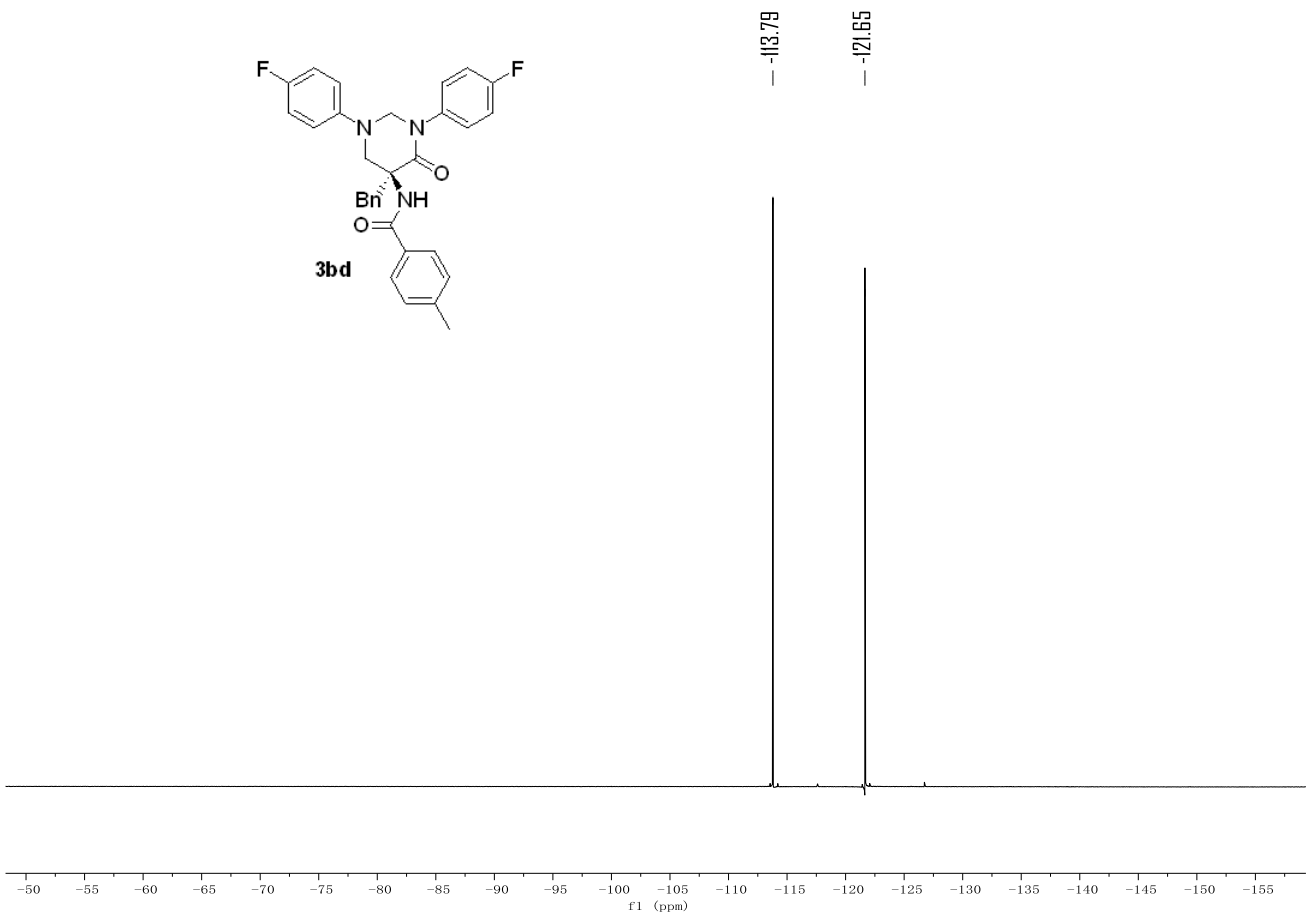

7.58  
7.58  
7.57  
7.56  
7.55  
7.54  
7.41  
7.40  
7.39  
7.38  
7.32  
7.32  
7.32  
7.31  
7.31  
7.31  
7.25  
7.24  
7.23  
7.22  
7.22  
7.20  
7.19  
7.18  
7.18  
7.17  
7.17  
6.88  
6.87  
6.86  
6.85  
6.85  
5.04  
5.01  
4.81  
4.81  
4.27  
4.26  
4.08  
4.04  
3.43  
3.42  
2.39

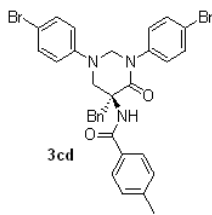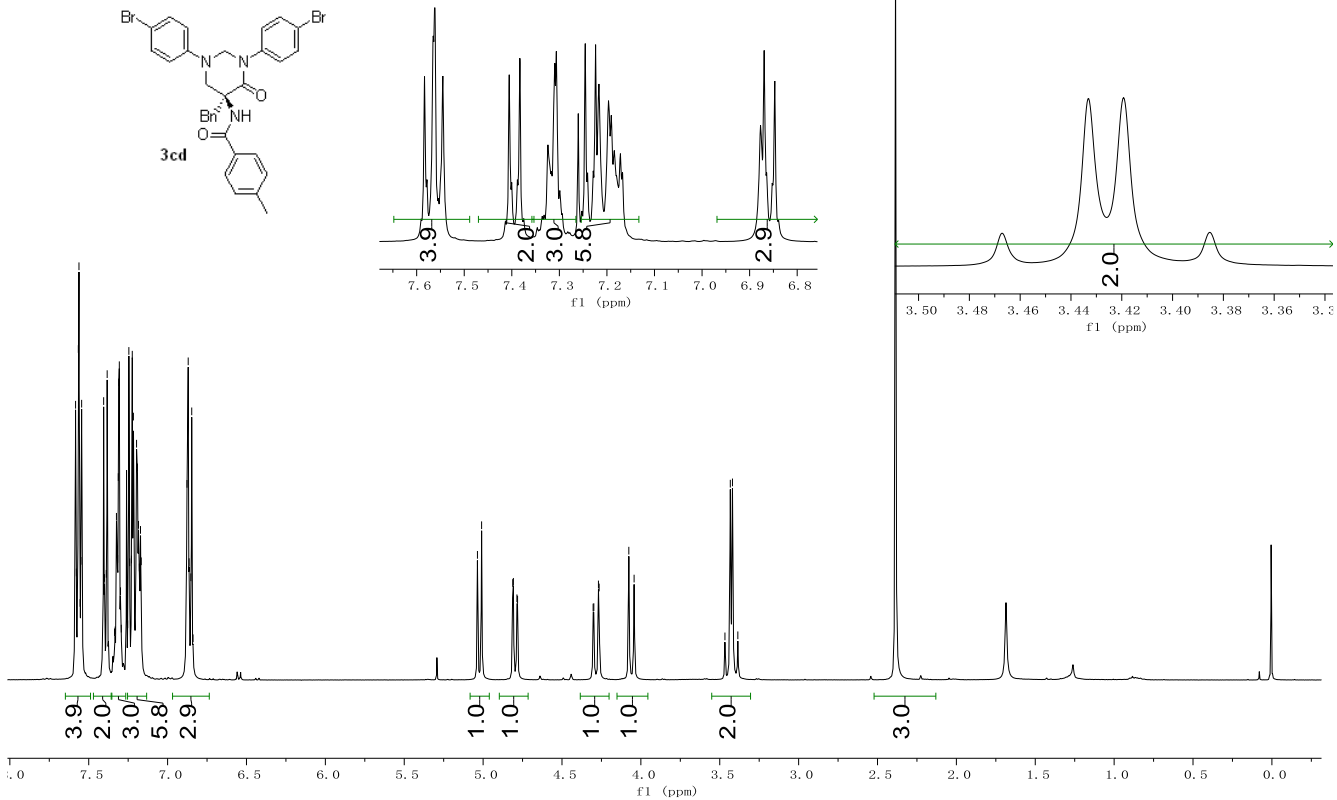

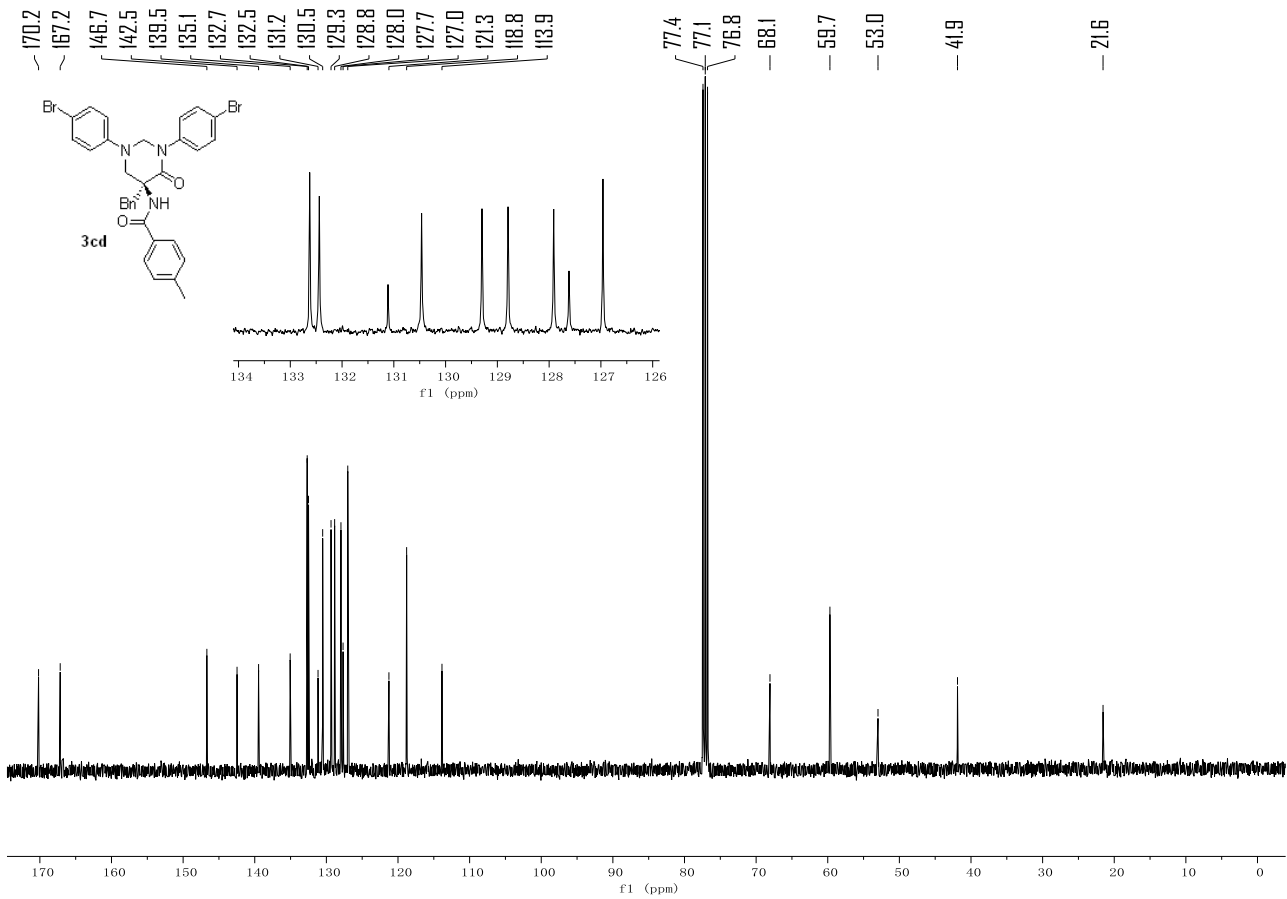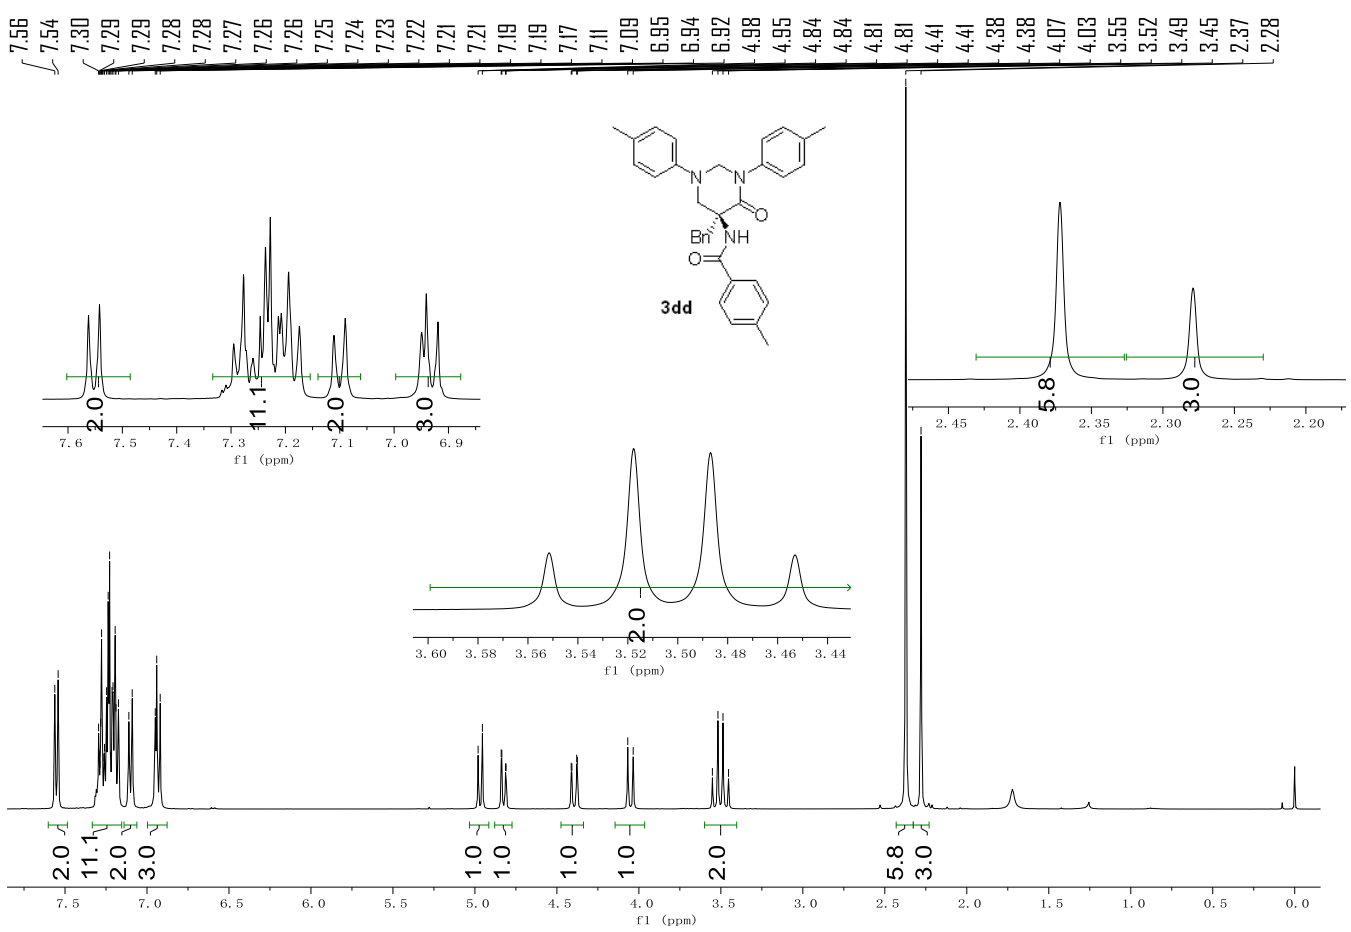

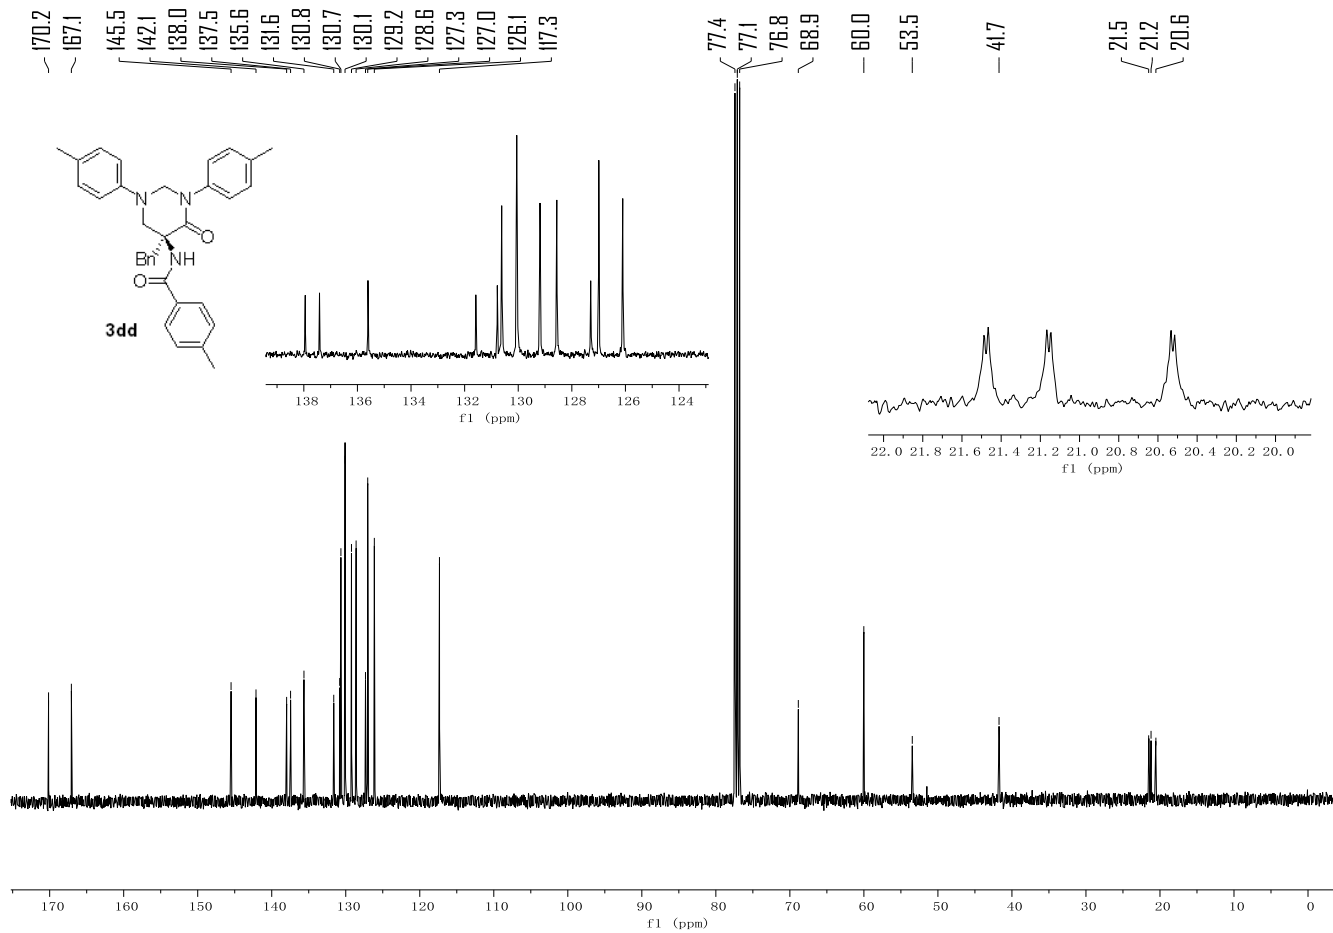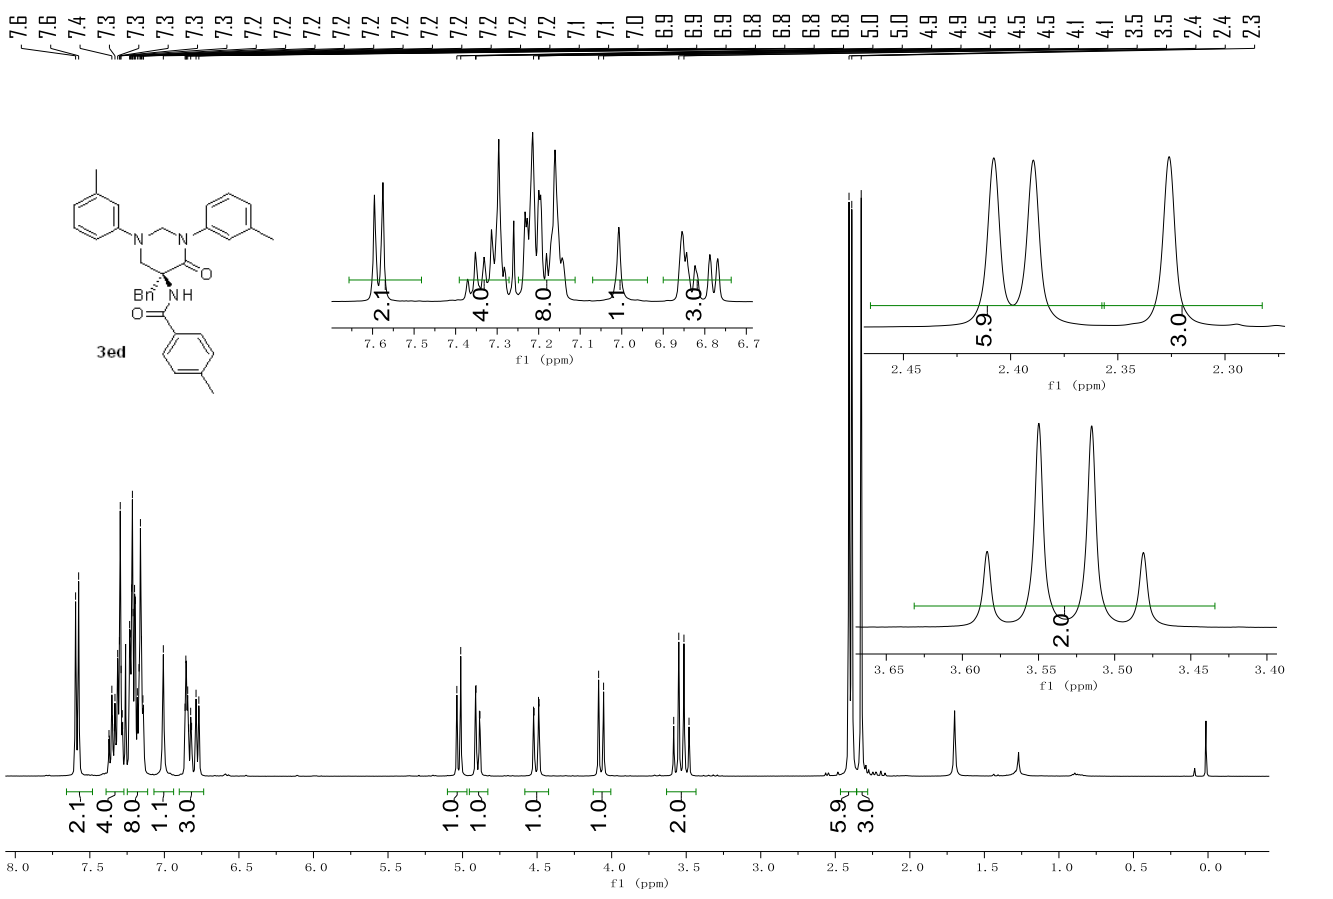

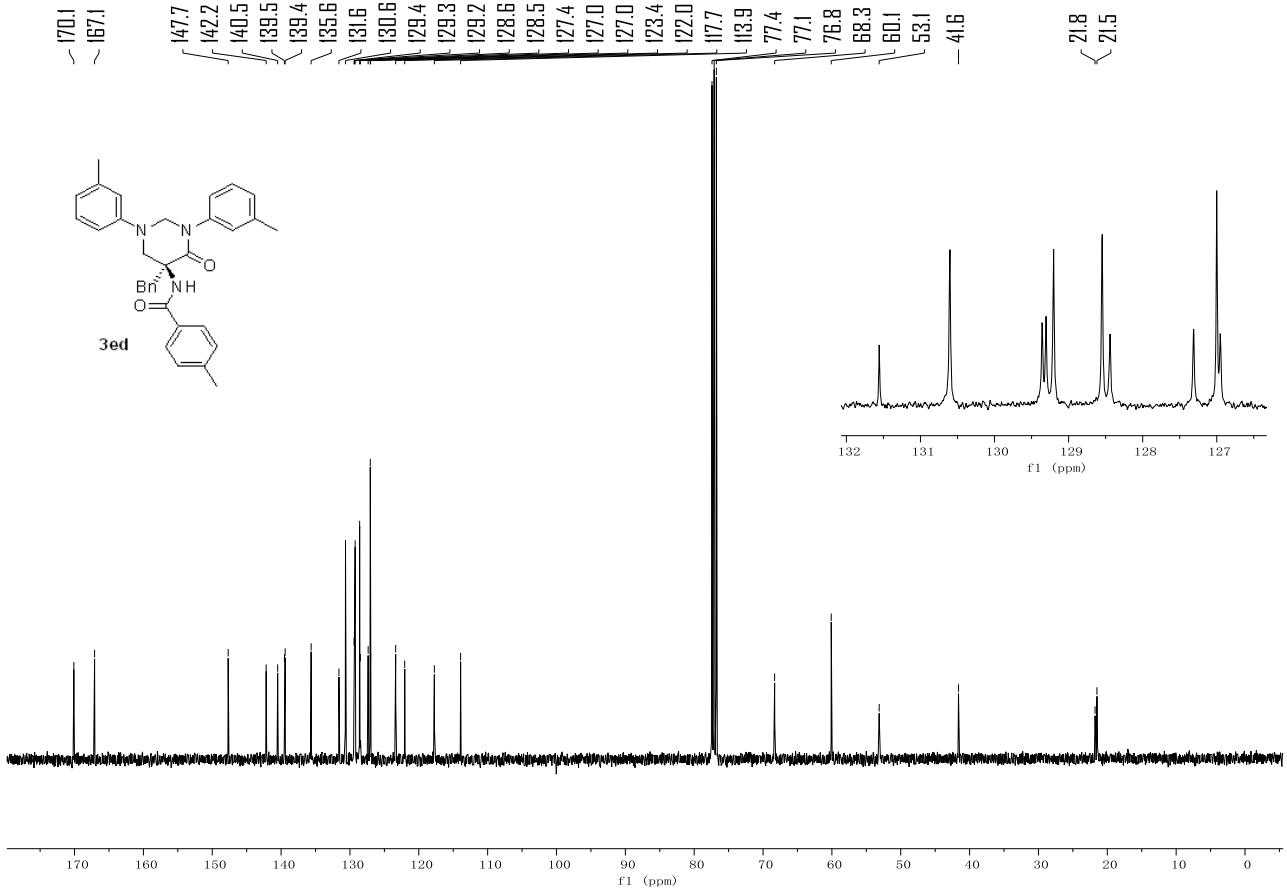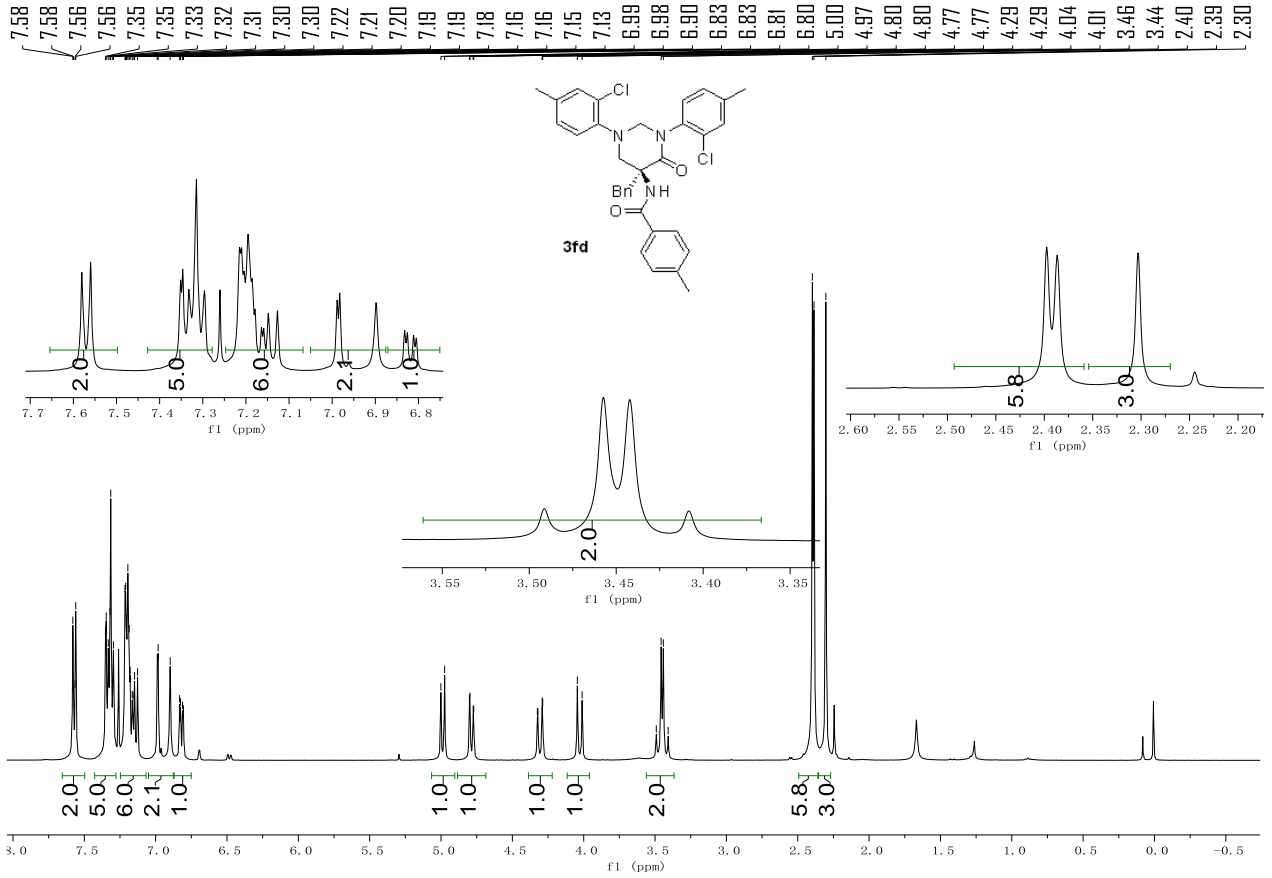

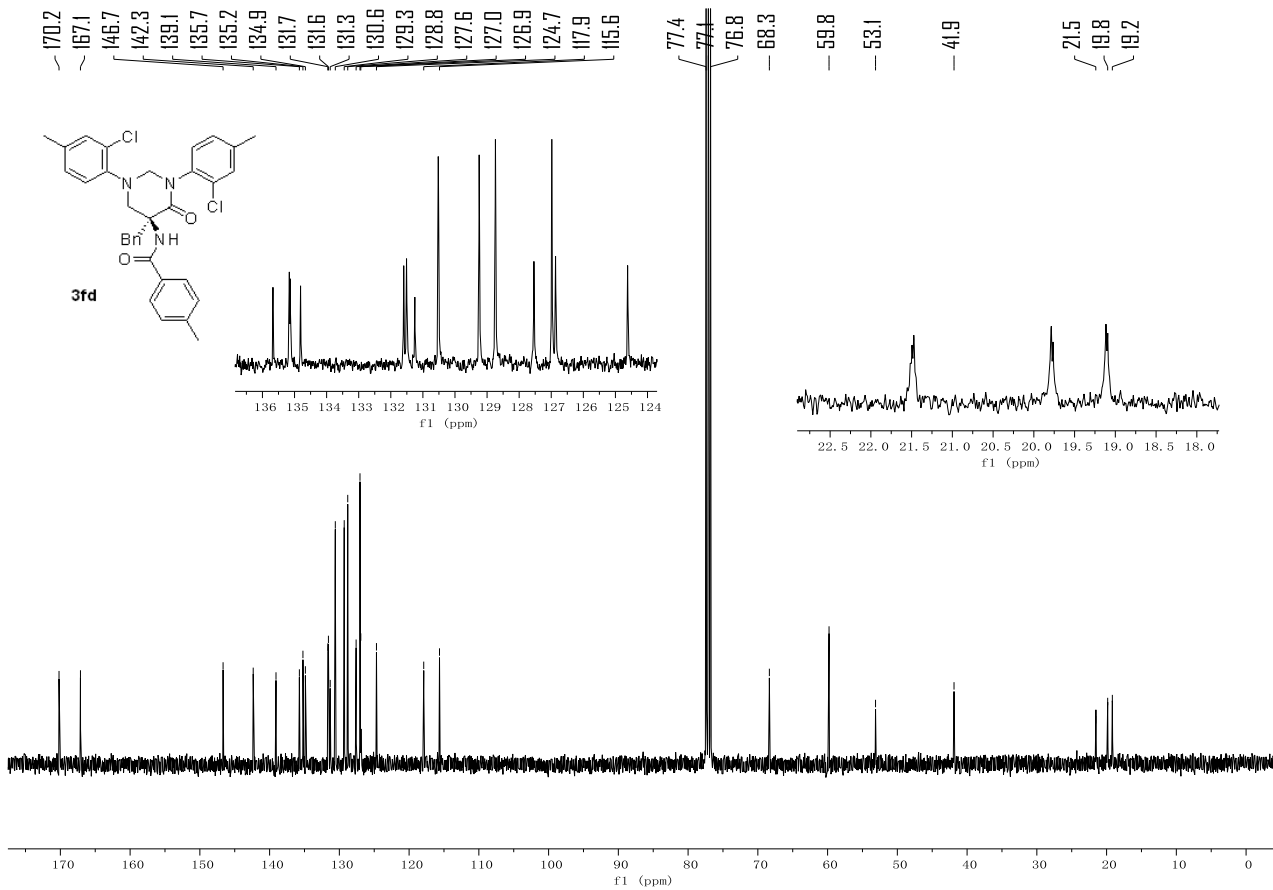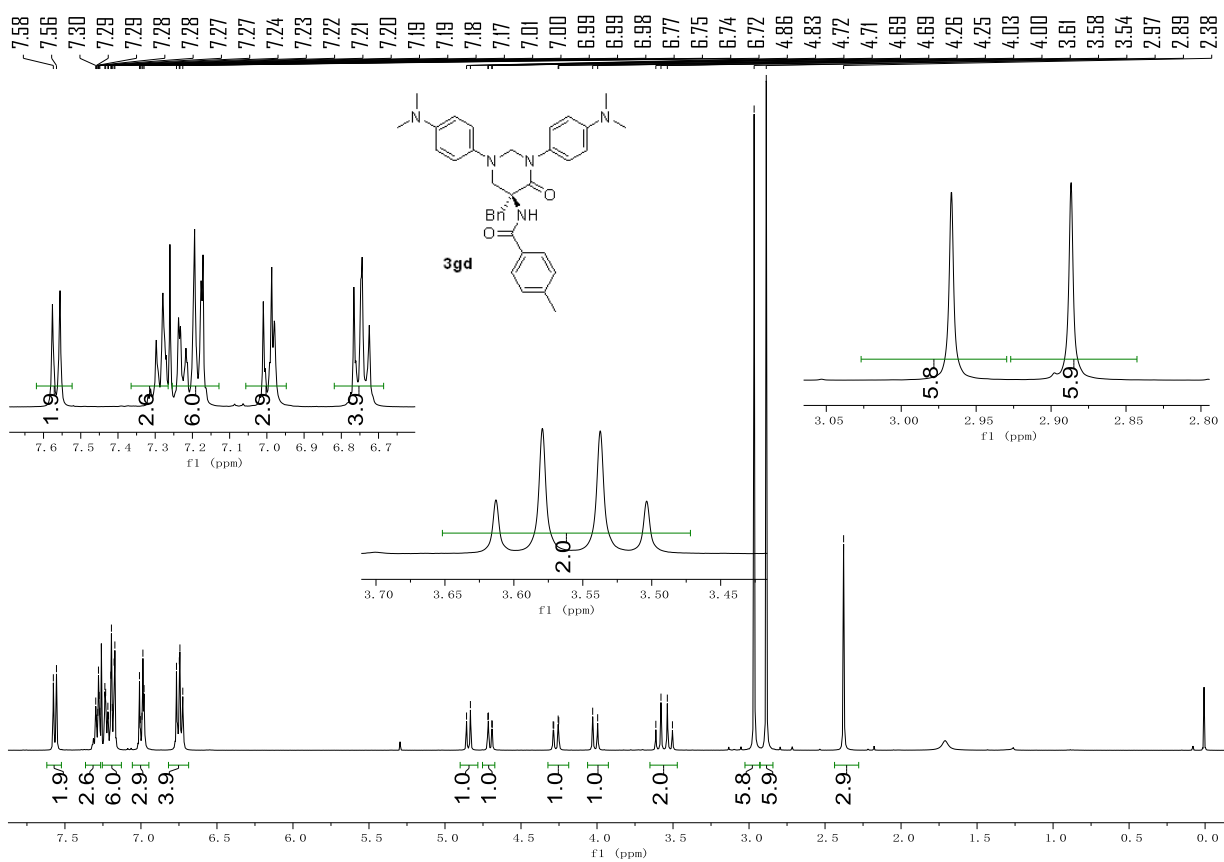

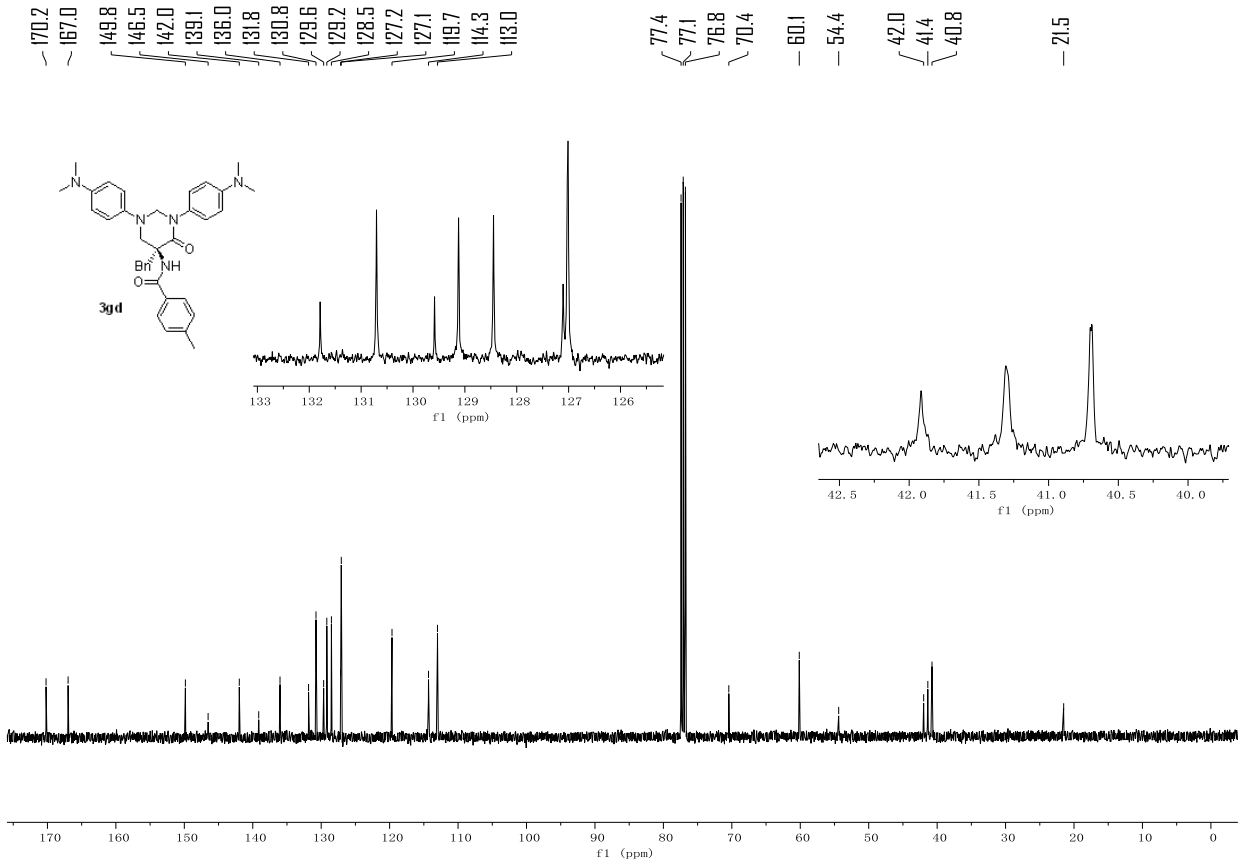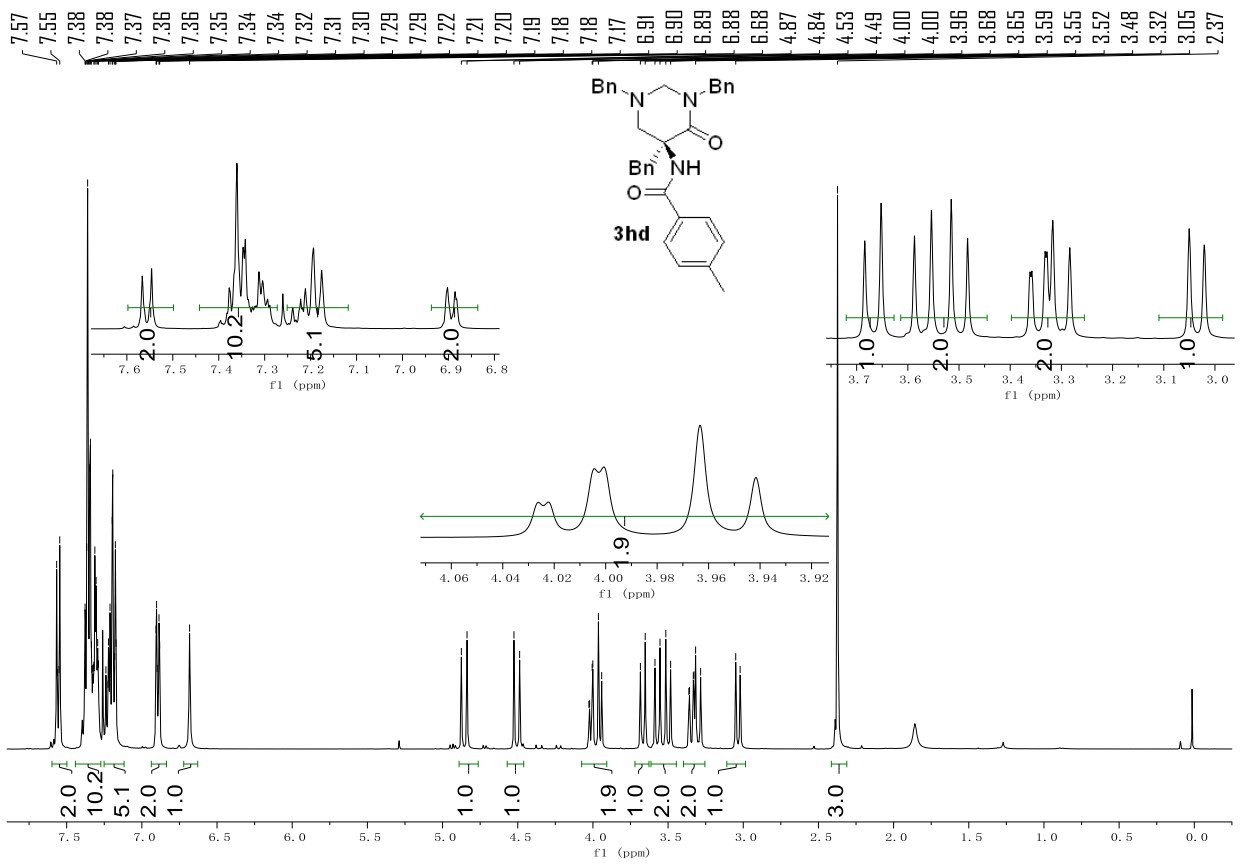



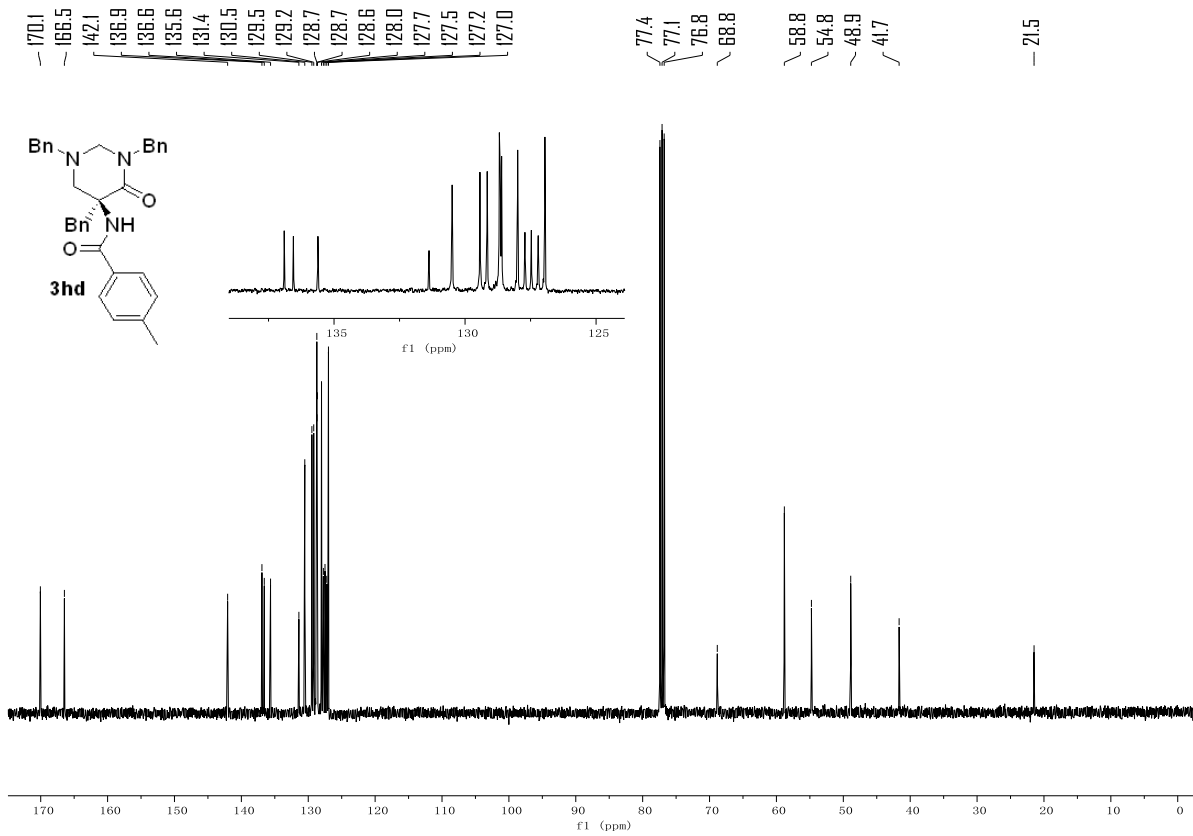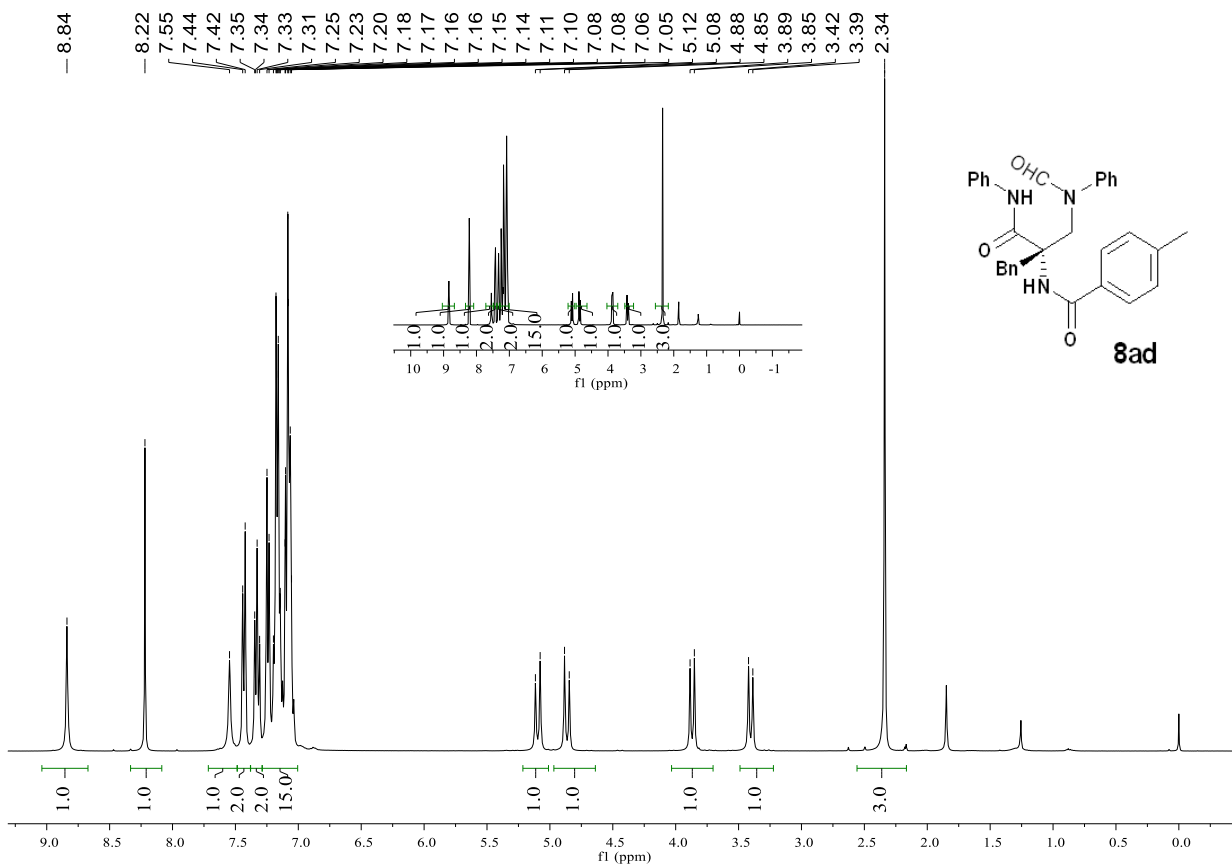

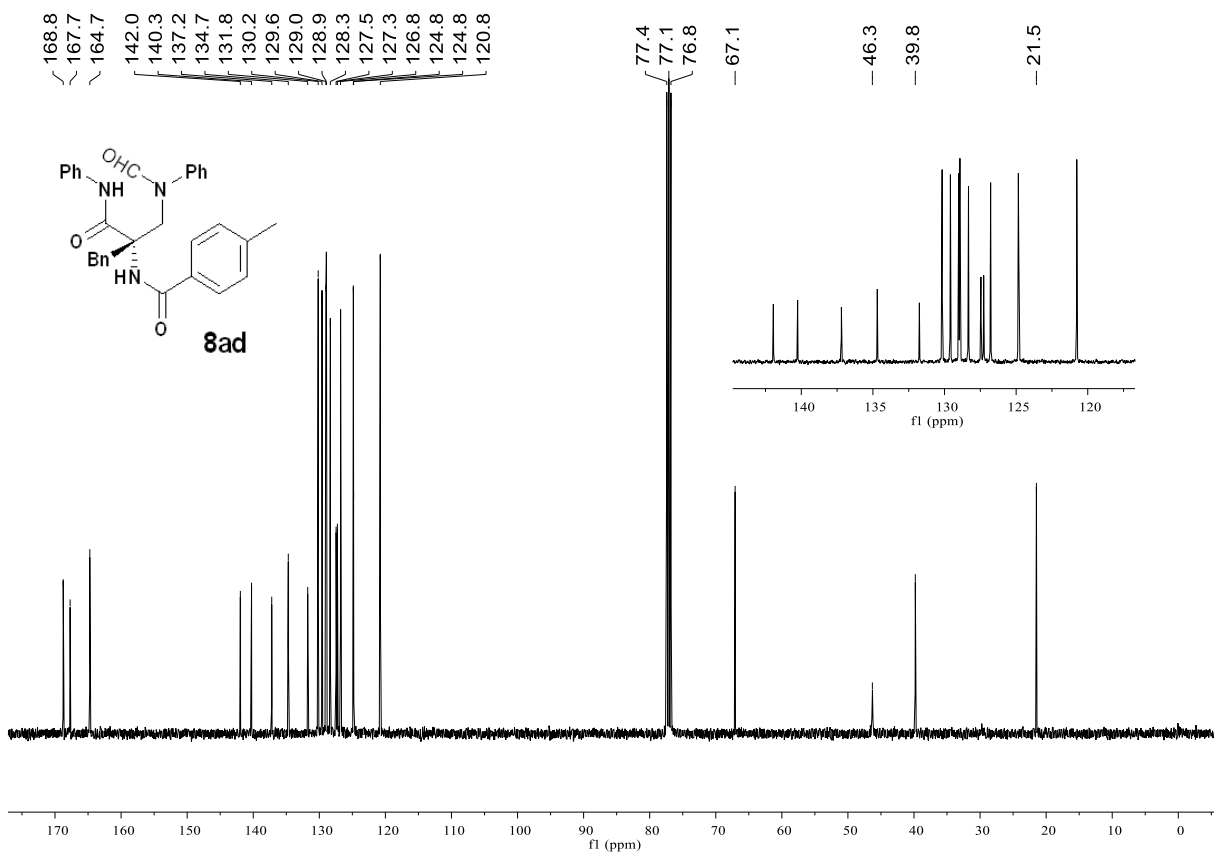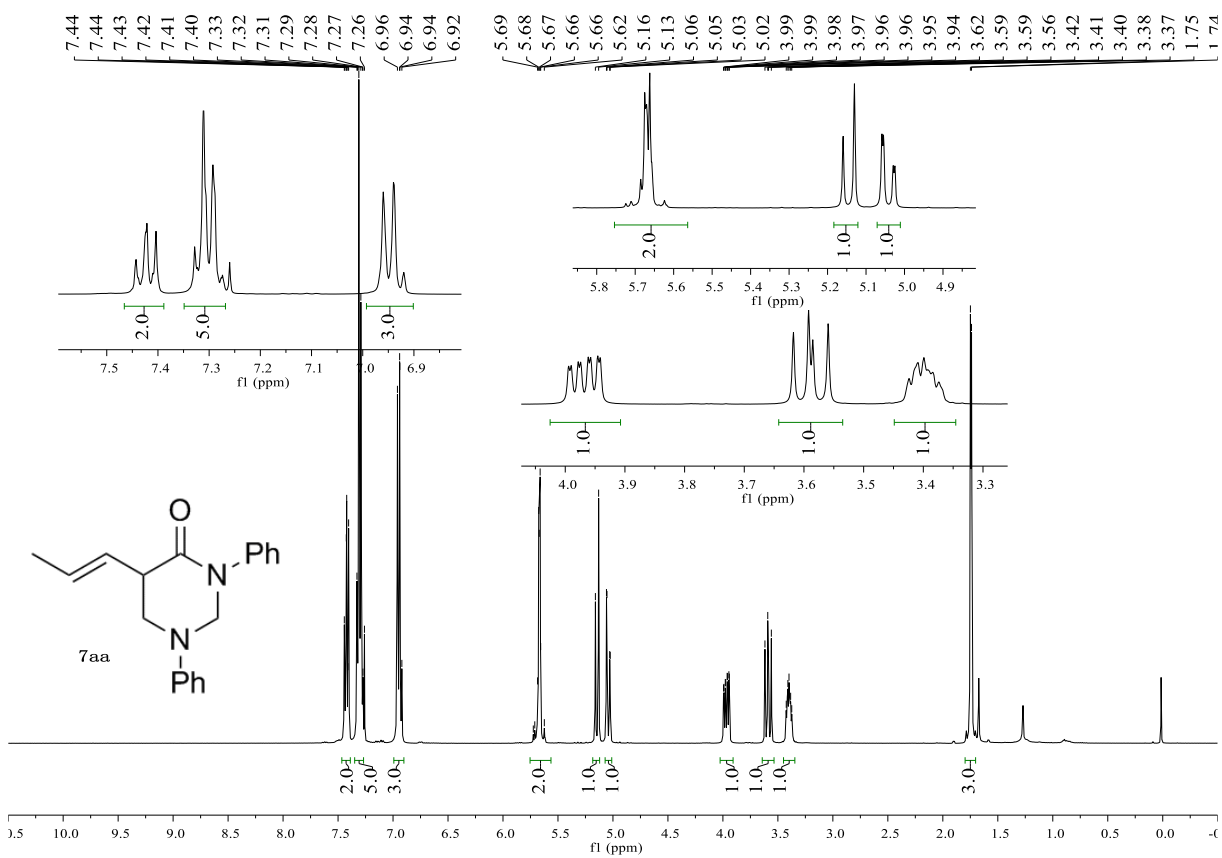

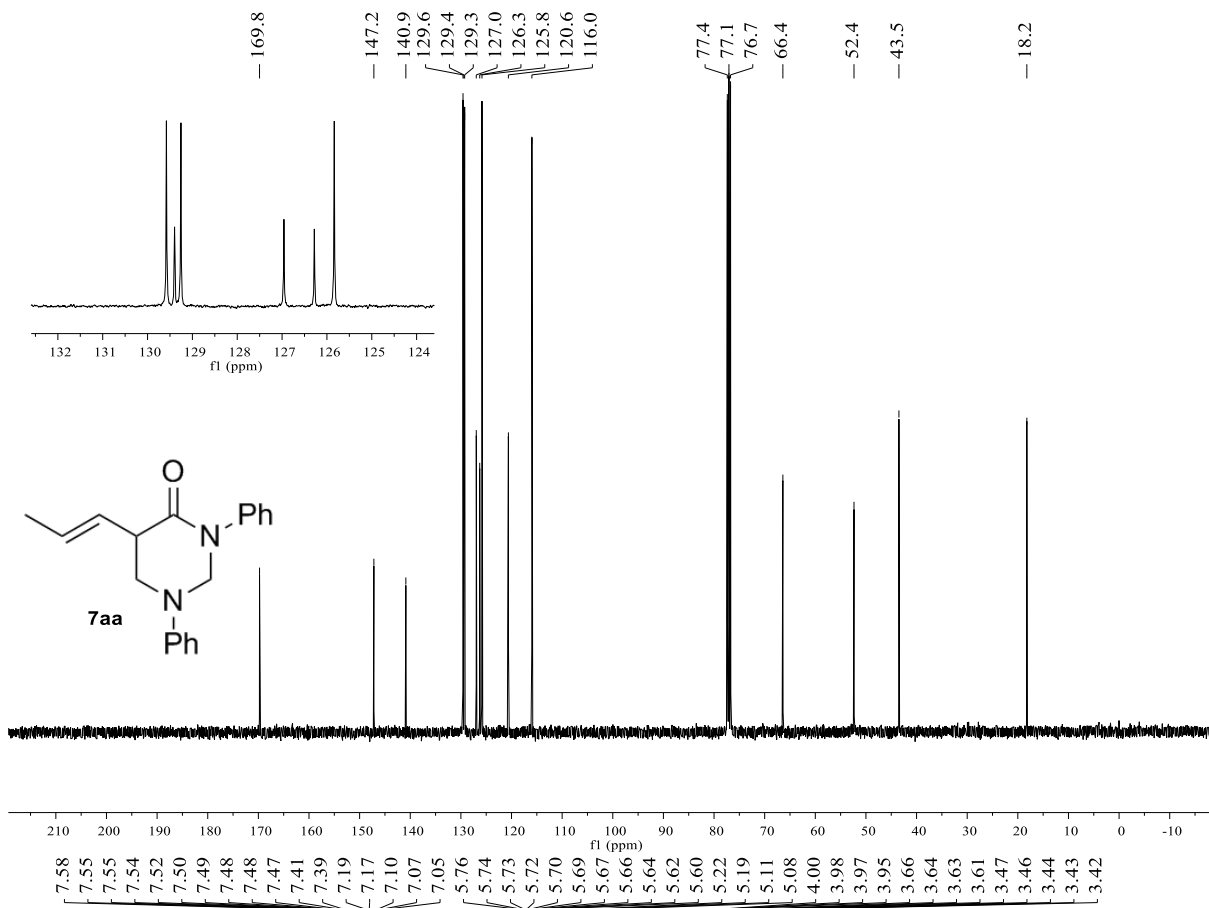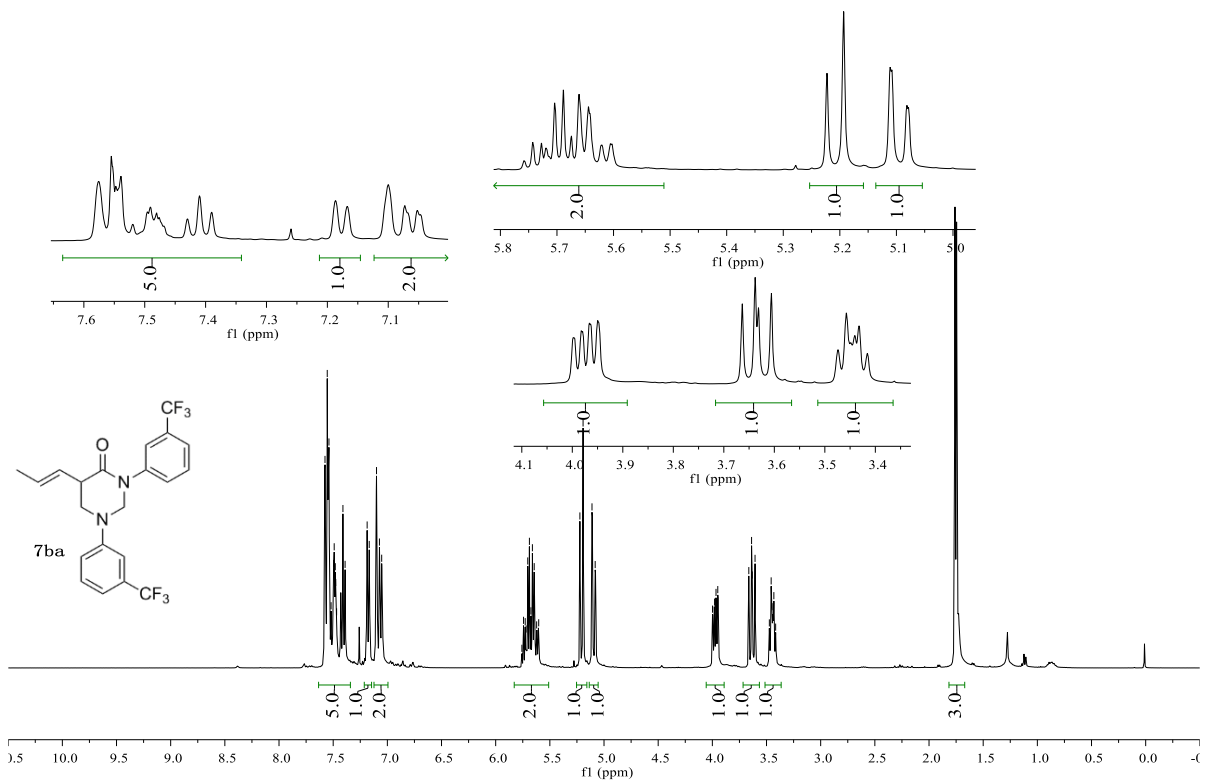

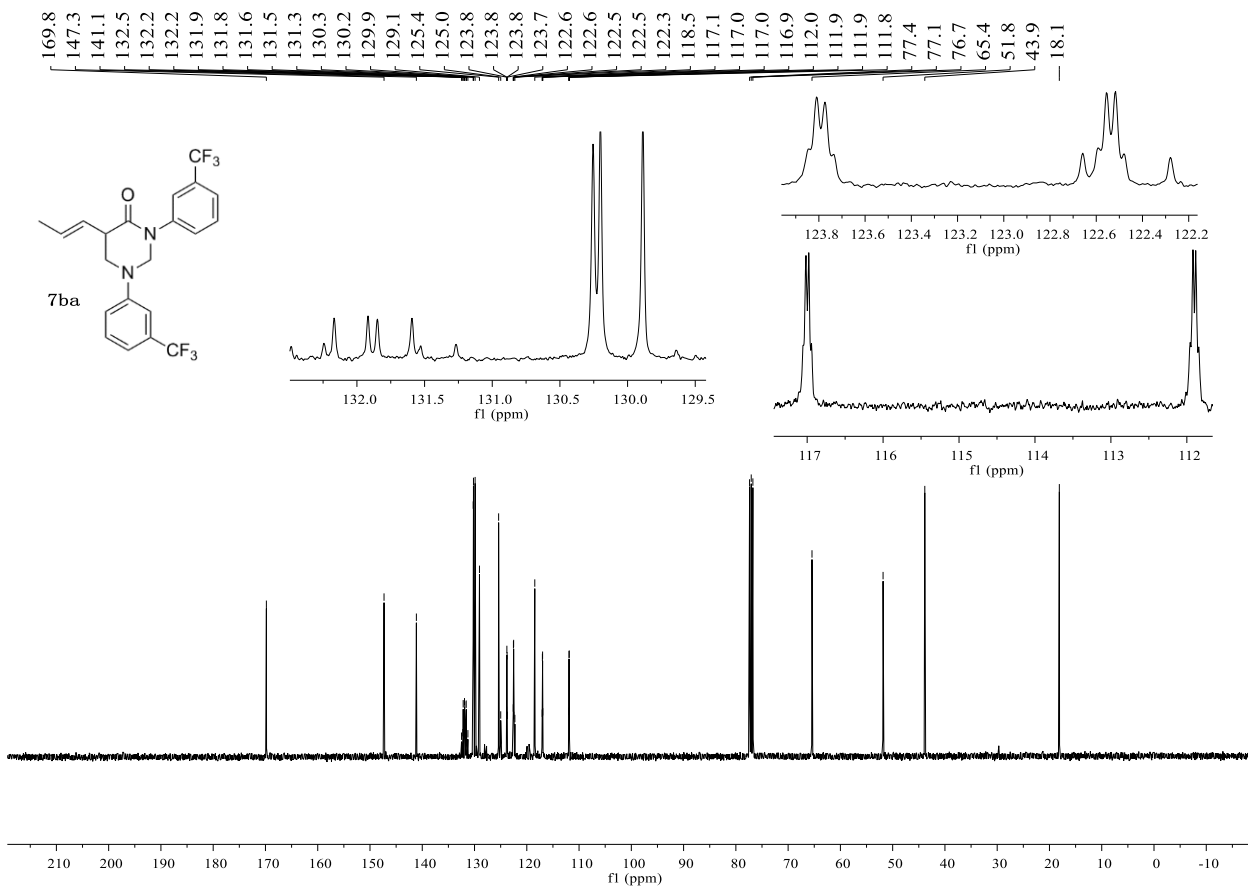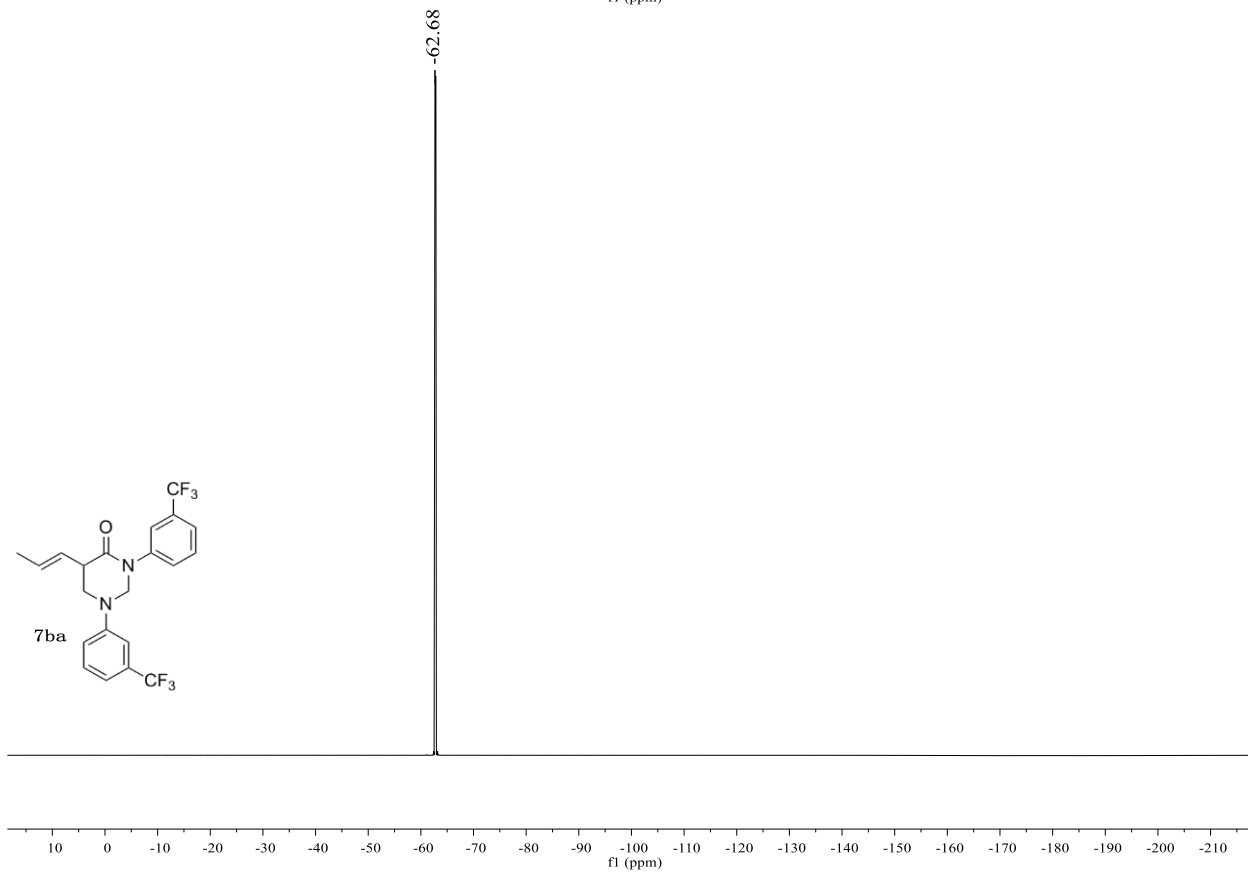

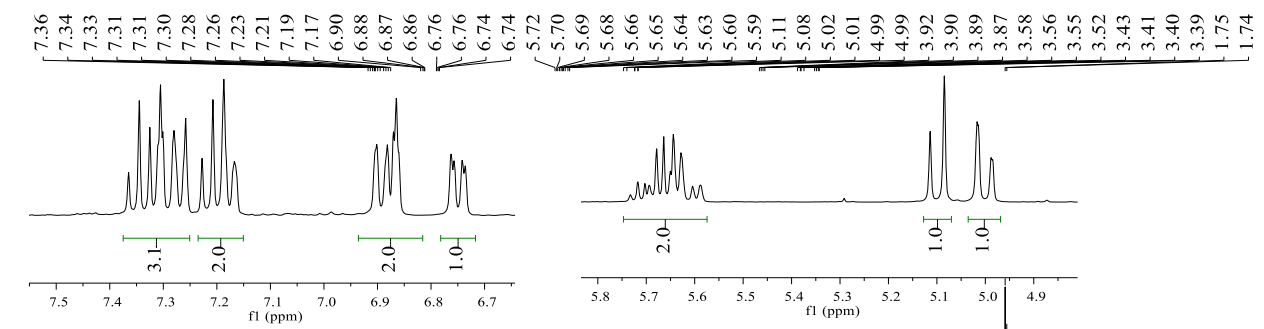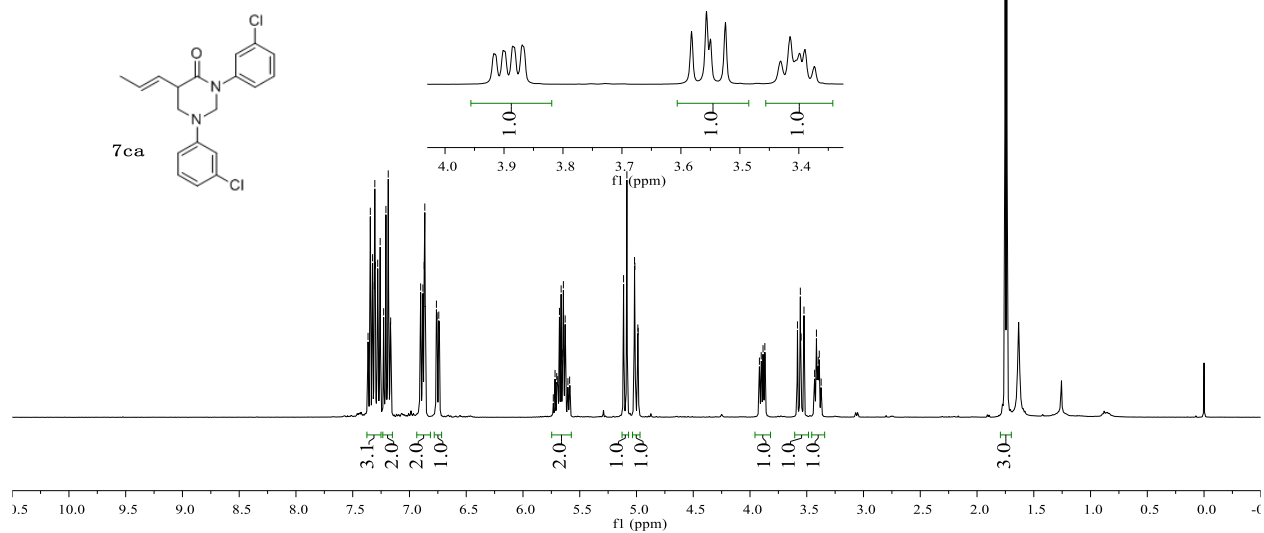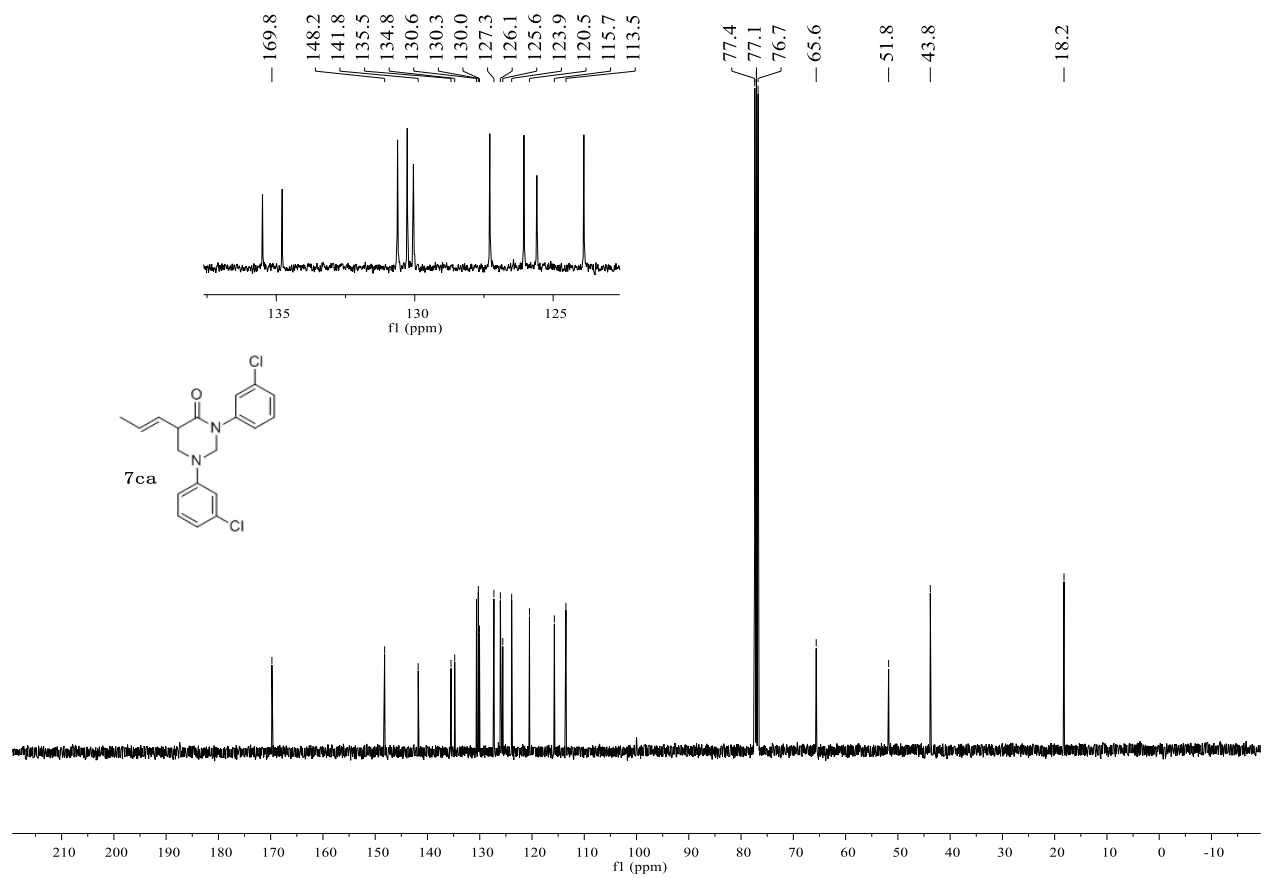



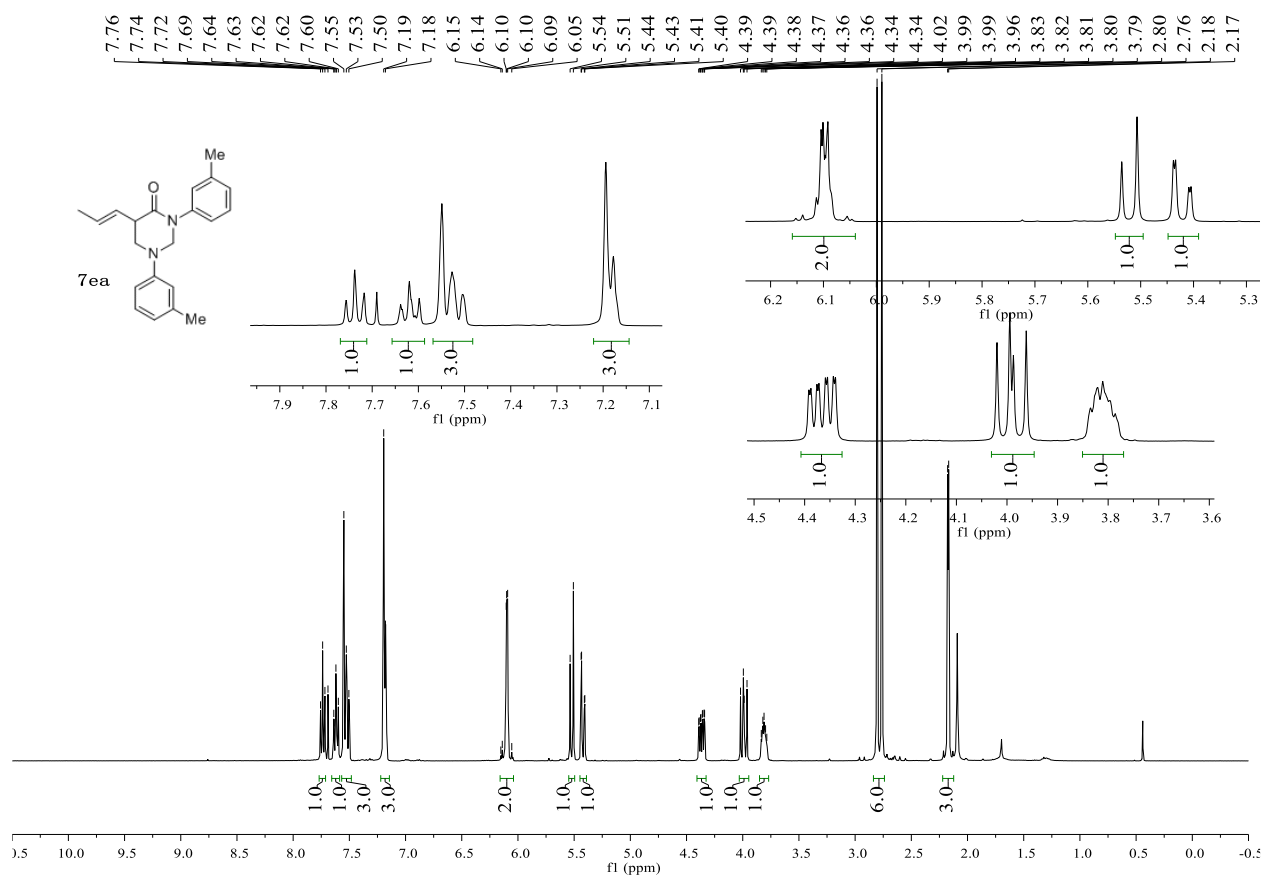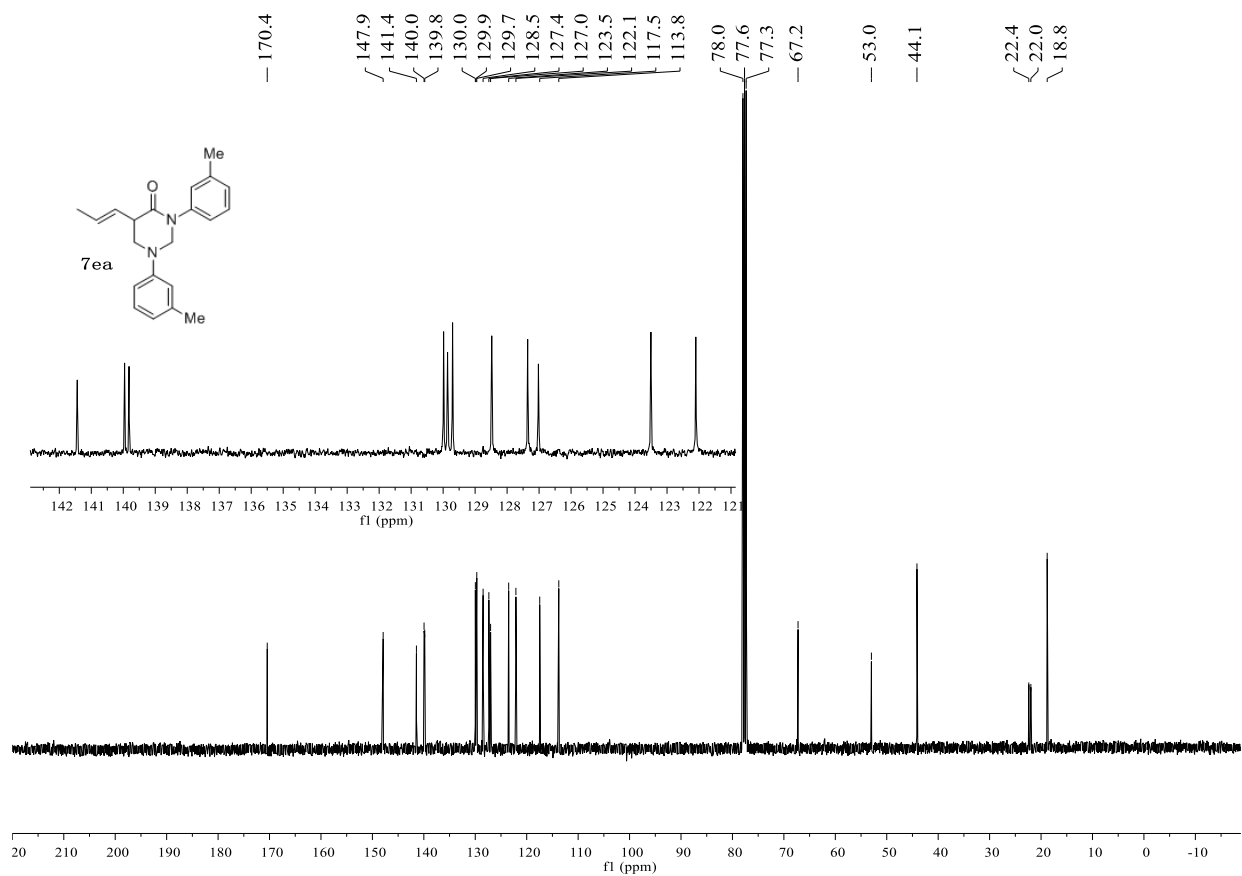





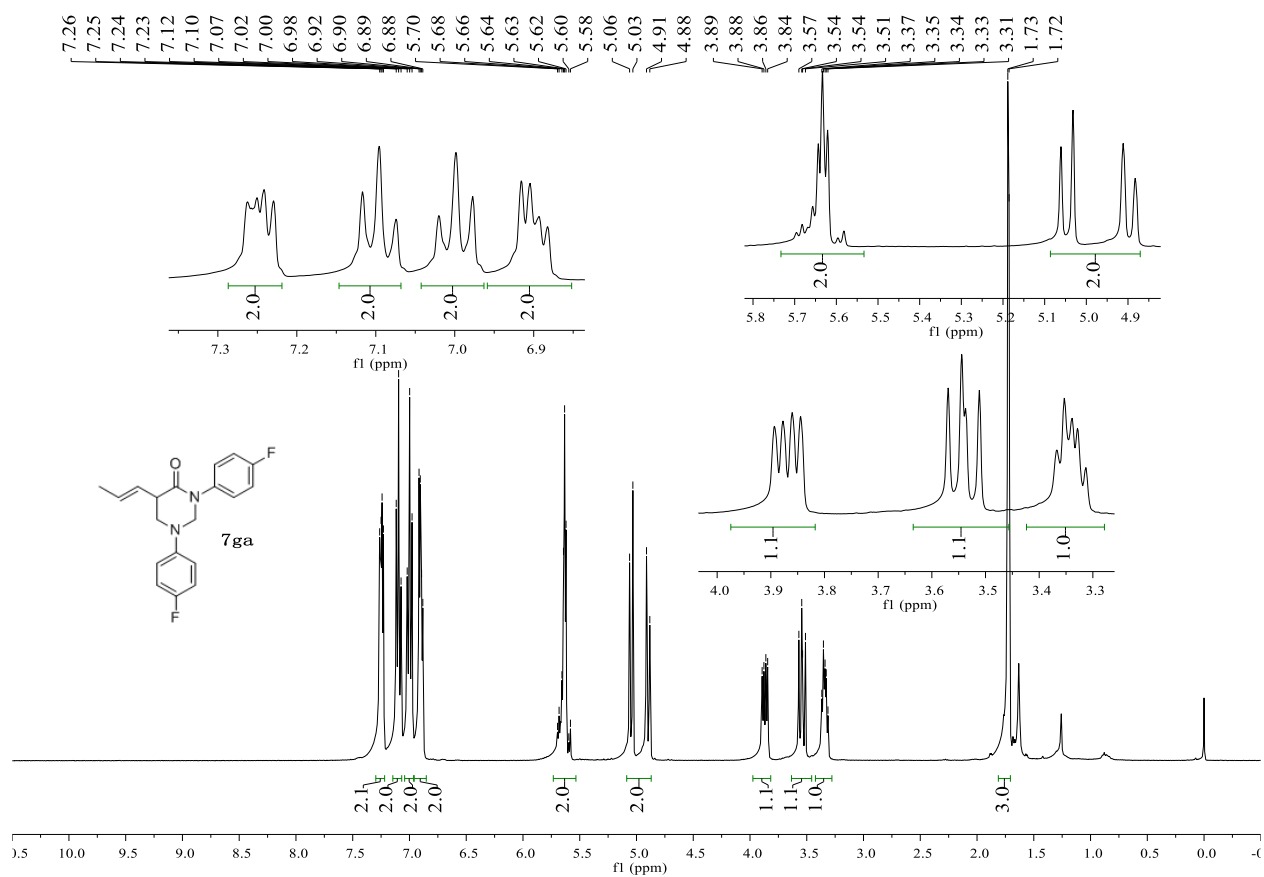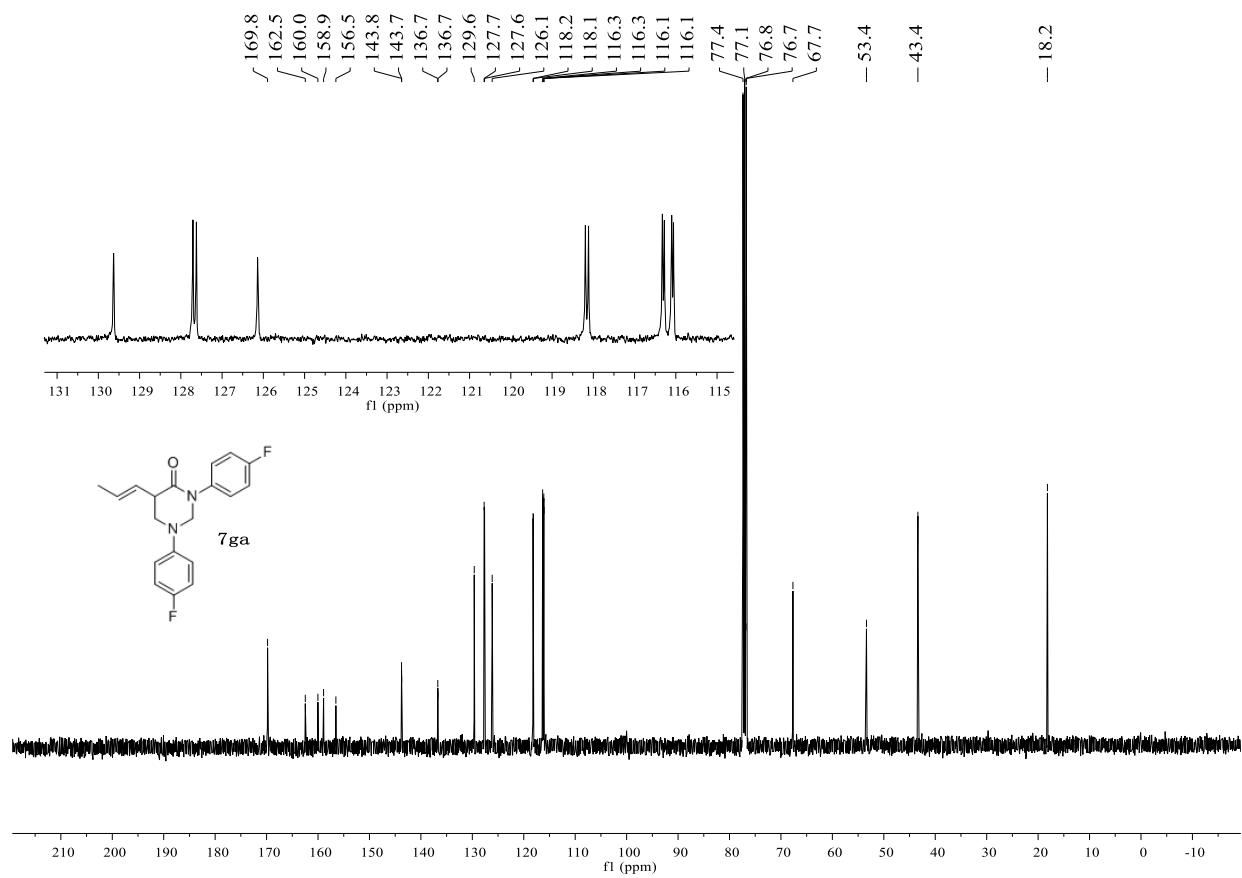

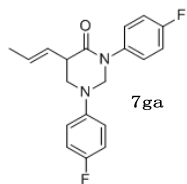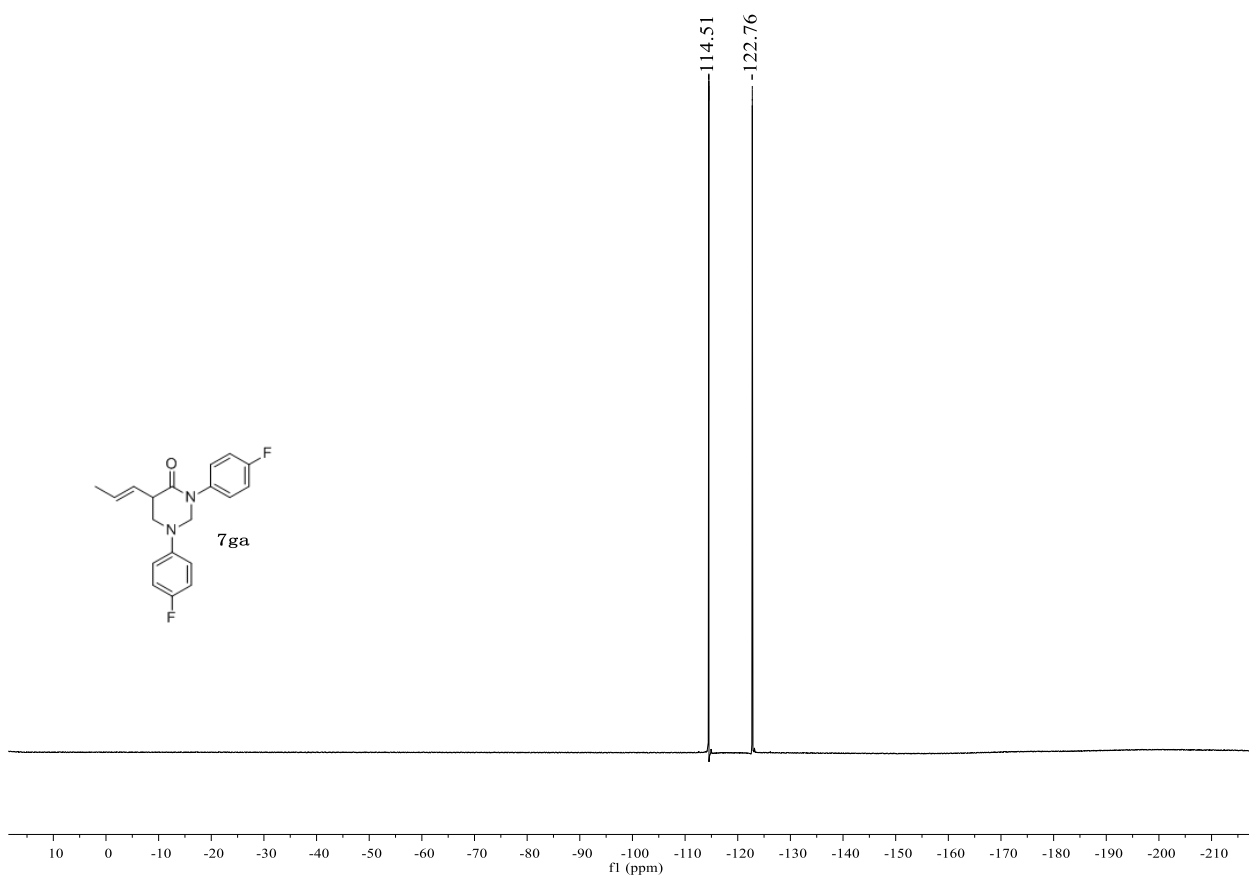

7.39, 7.37, 7.26, 7.23, 7.22, 7.20, 6.83, 6.81, 5.71, 5.69, 5.68, 5.67, 5.66, 5.64, 5.63, 5.62, 5.59, 5.58, 5.10, 5.07, 4.98, 4.95, 3.92, 3.90, 3.89, 3.87, 3.87, 3.58, 3.55, 3.54, 3.52, 3.40, 3.38, 3.37, 3.36, 3.34, 1.74, 1.73

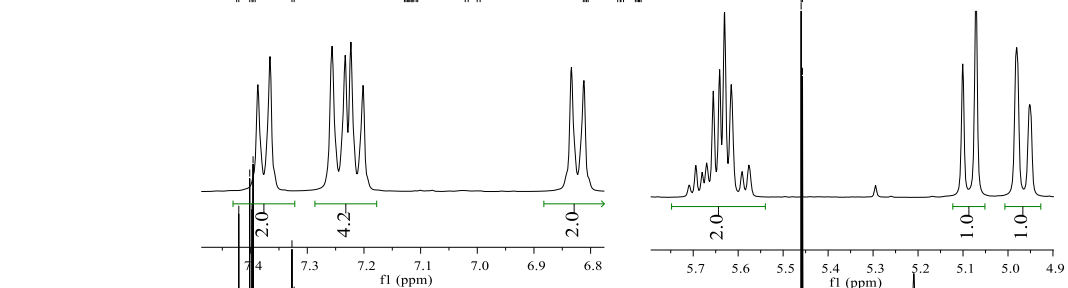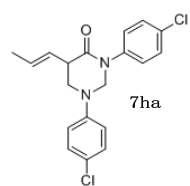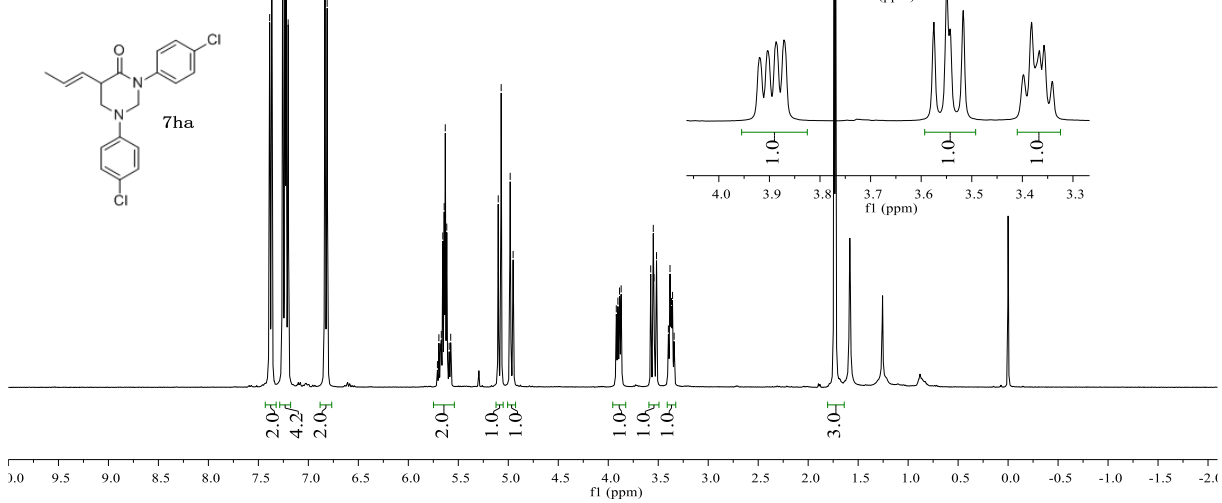

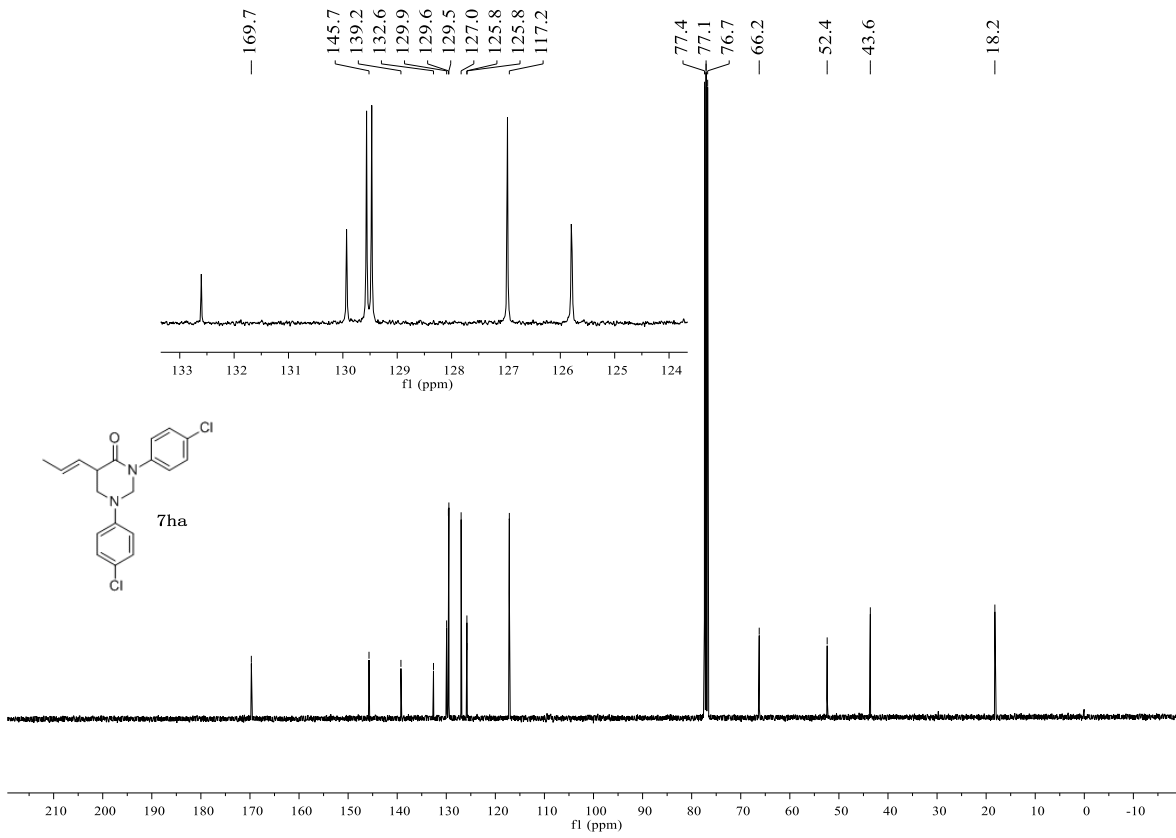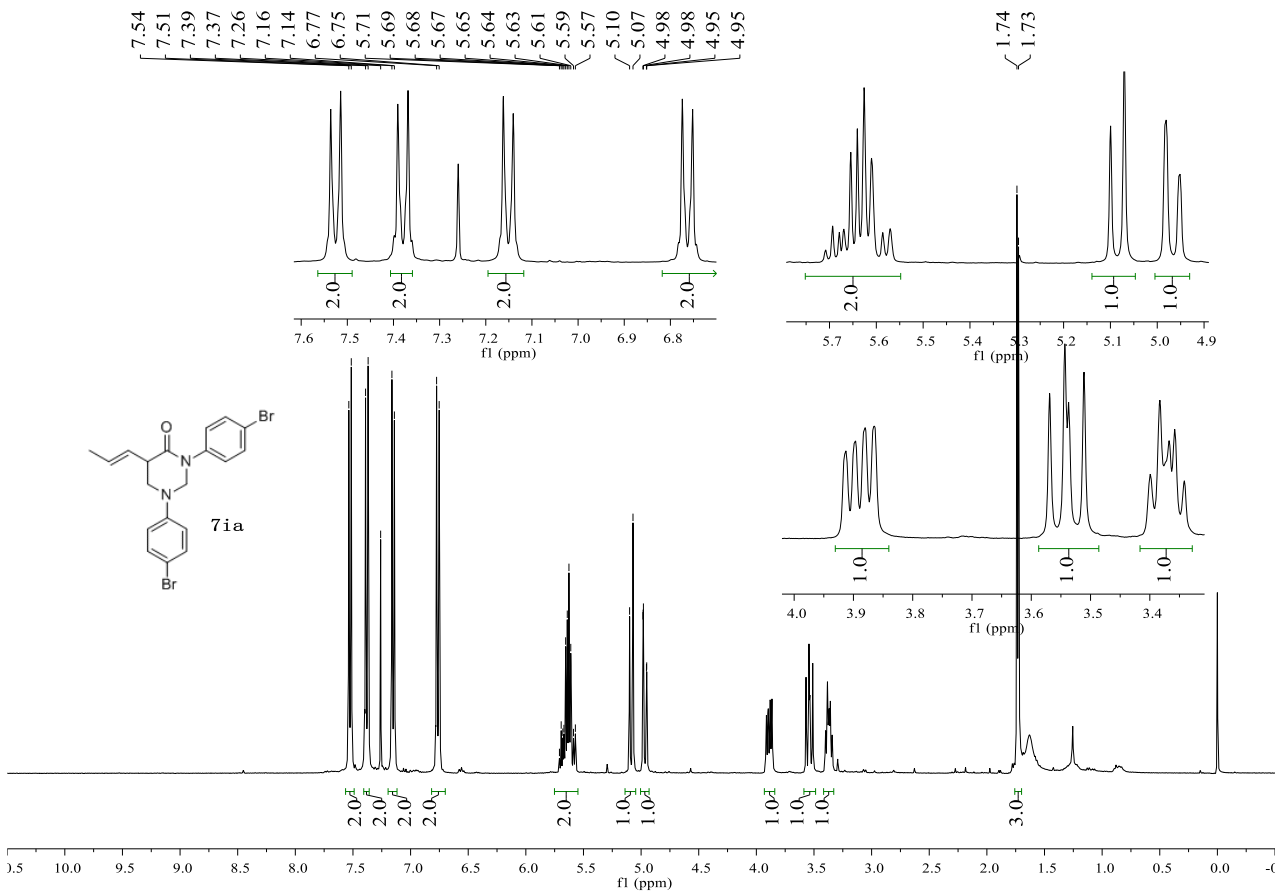

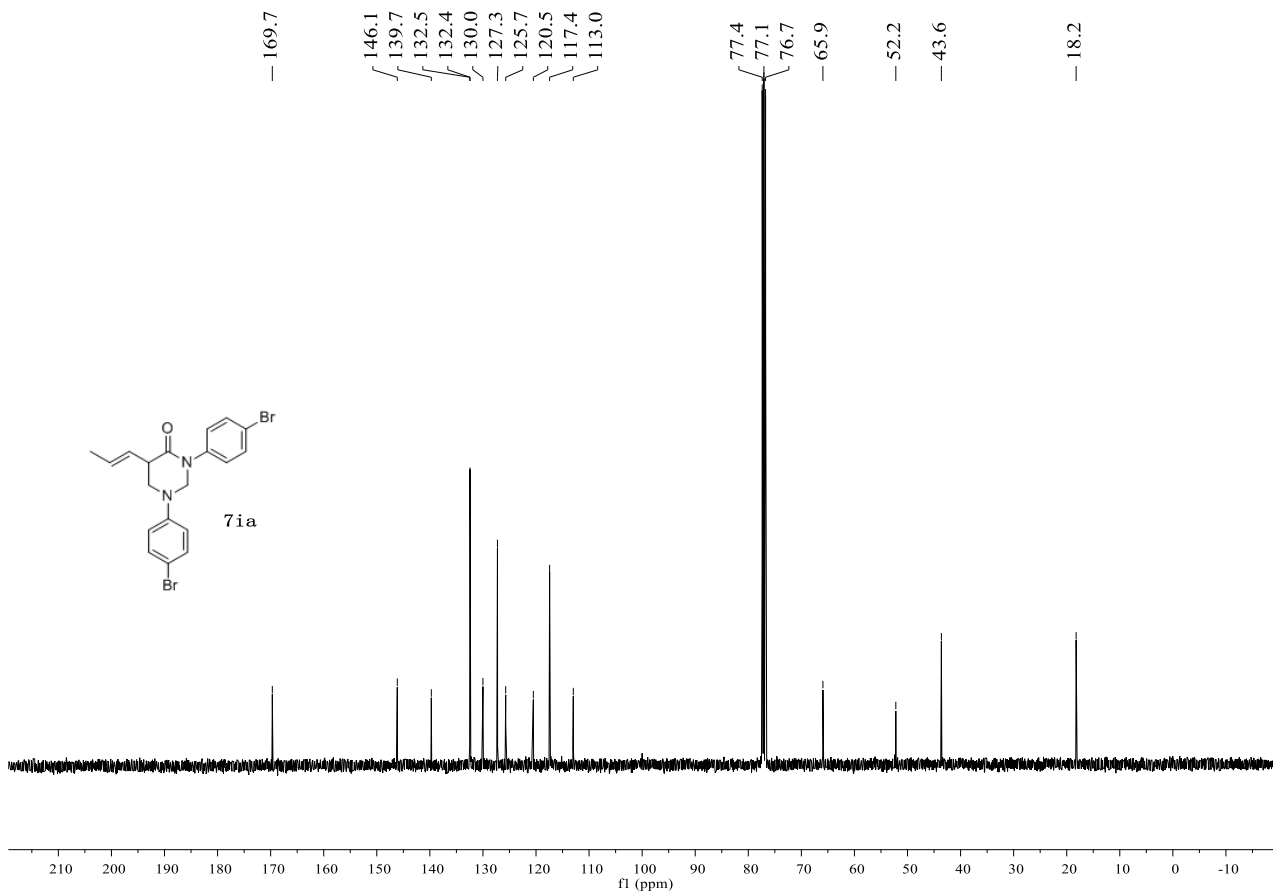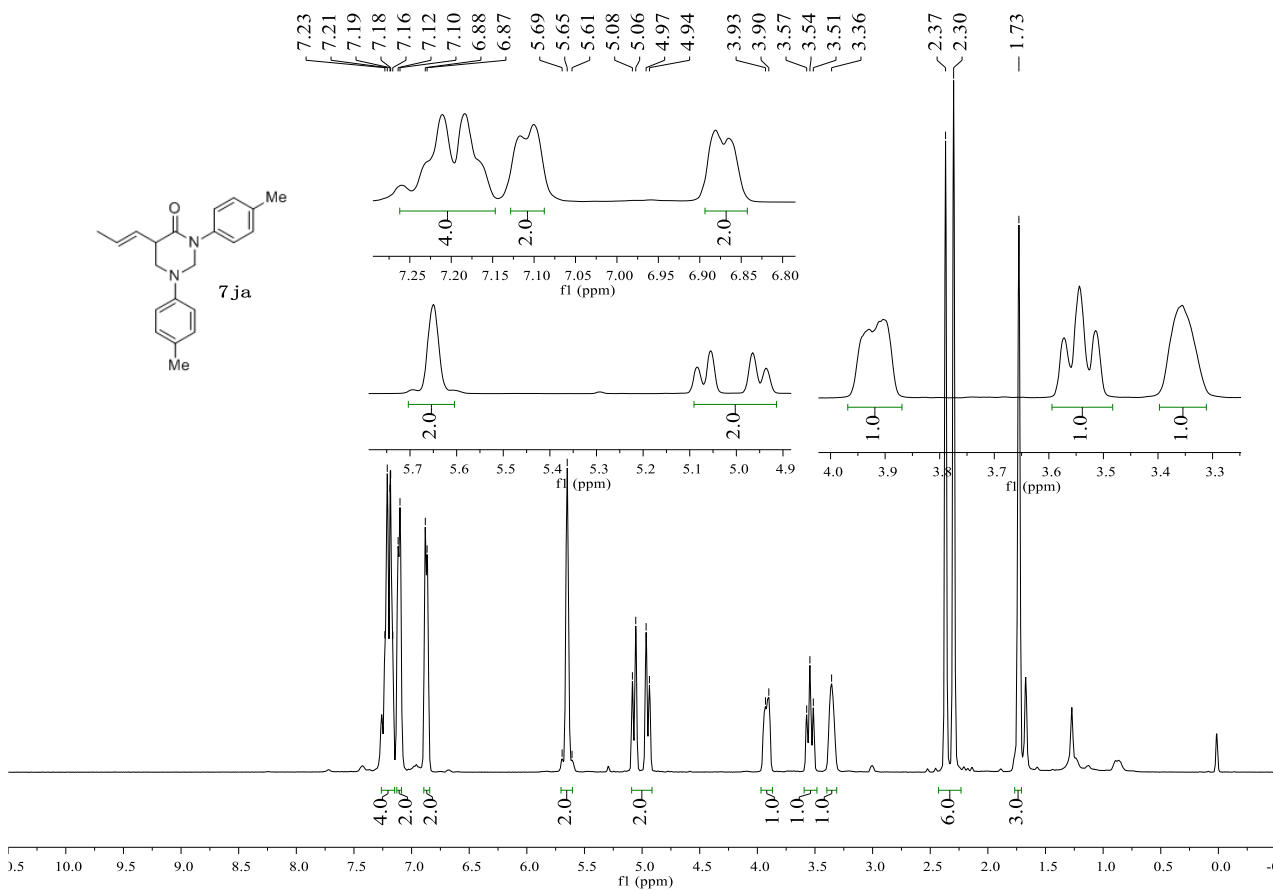

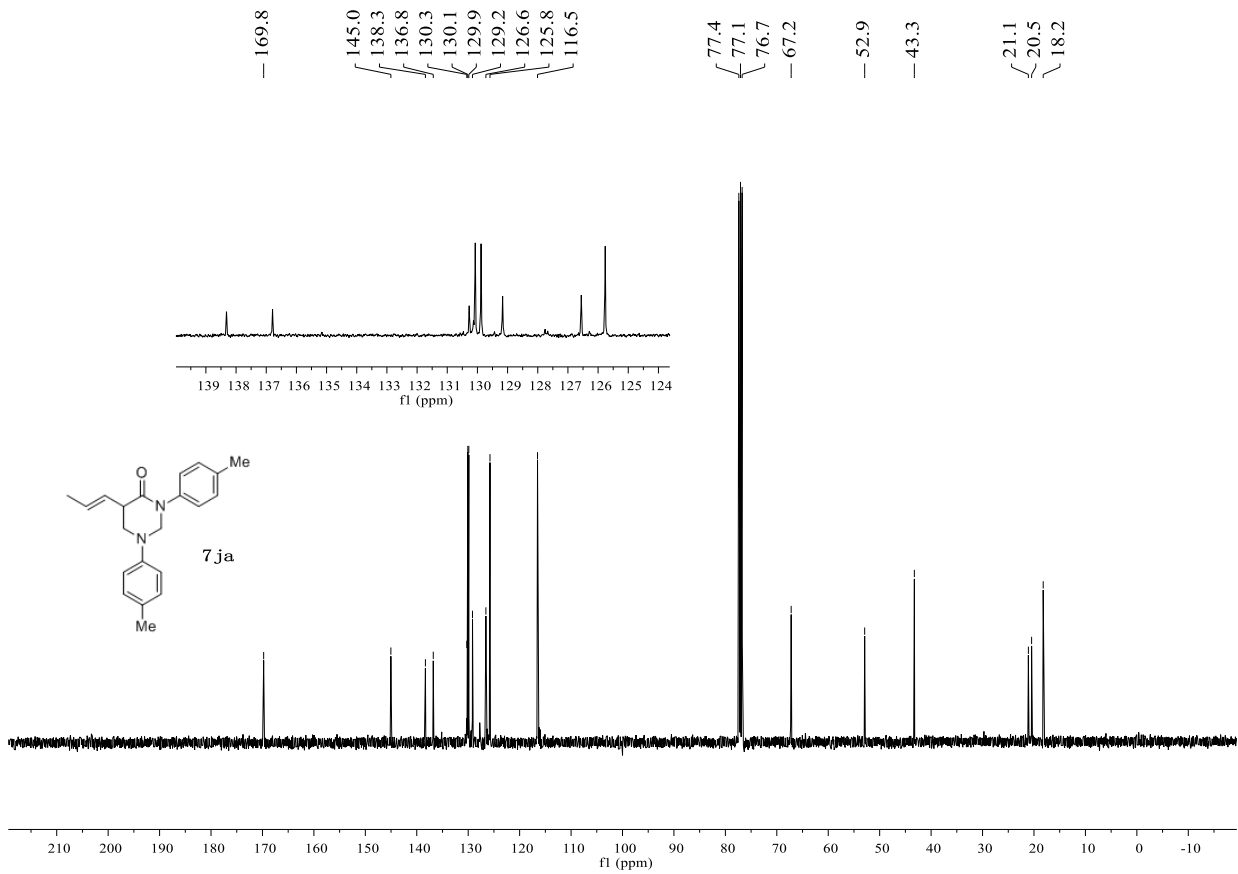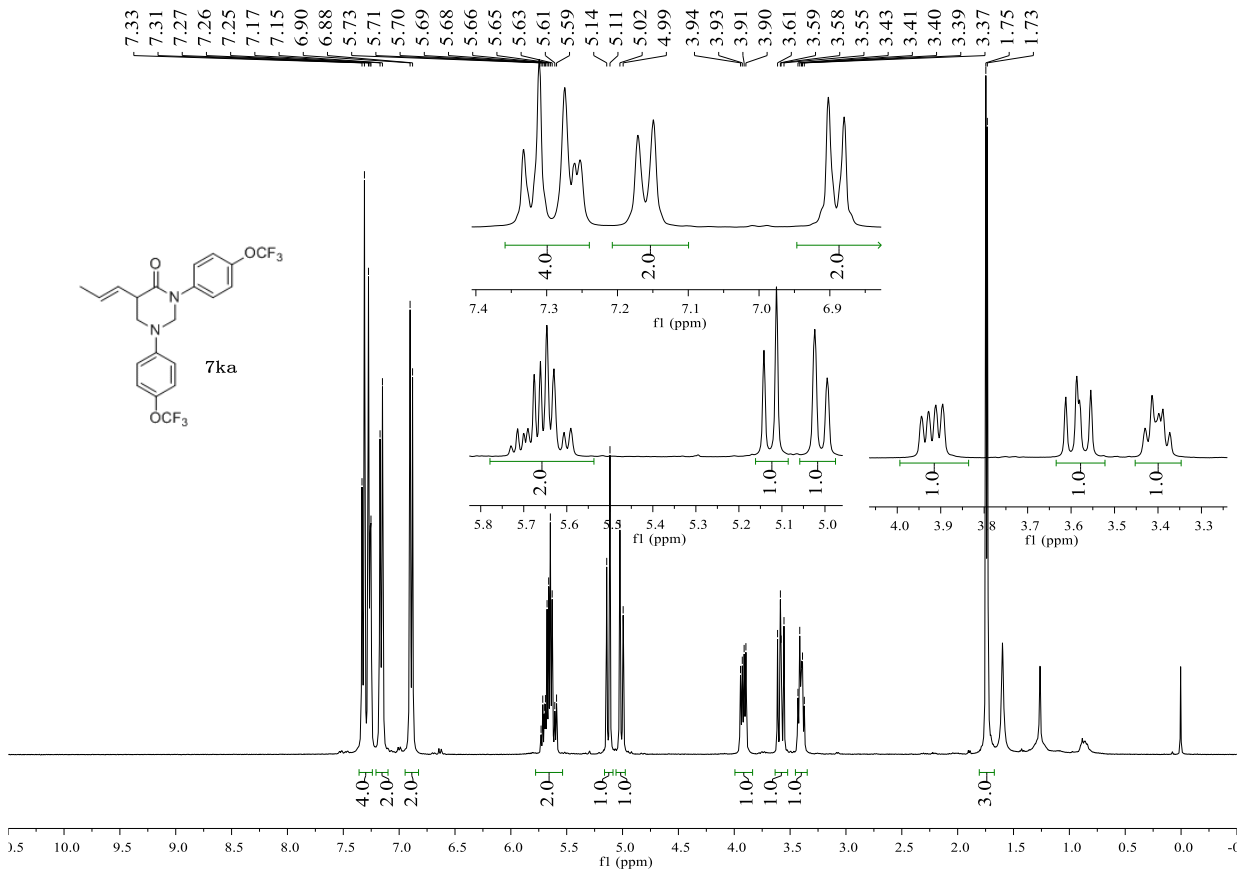

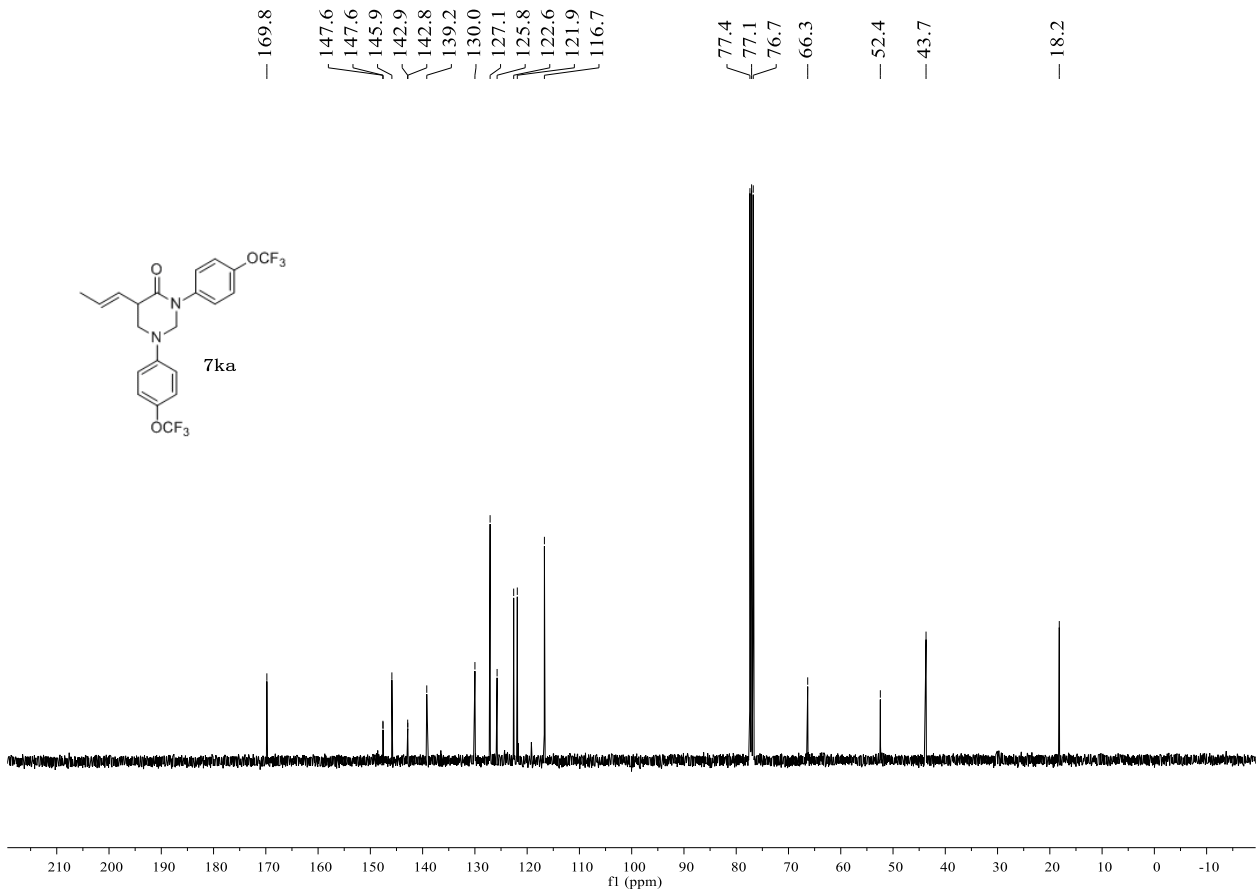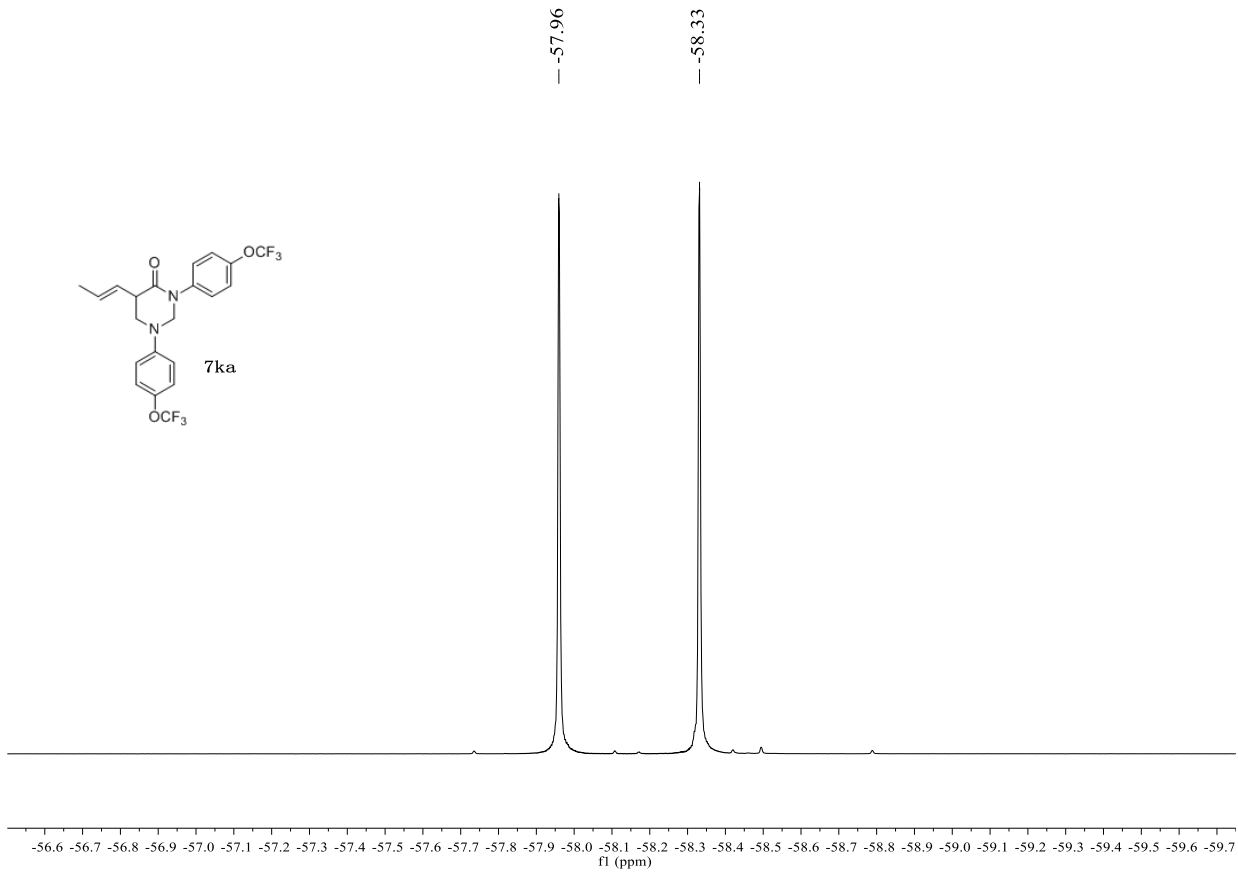

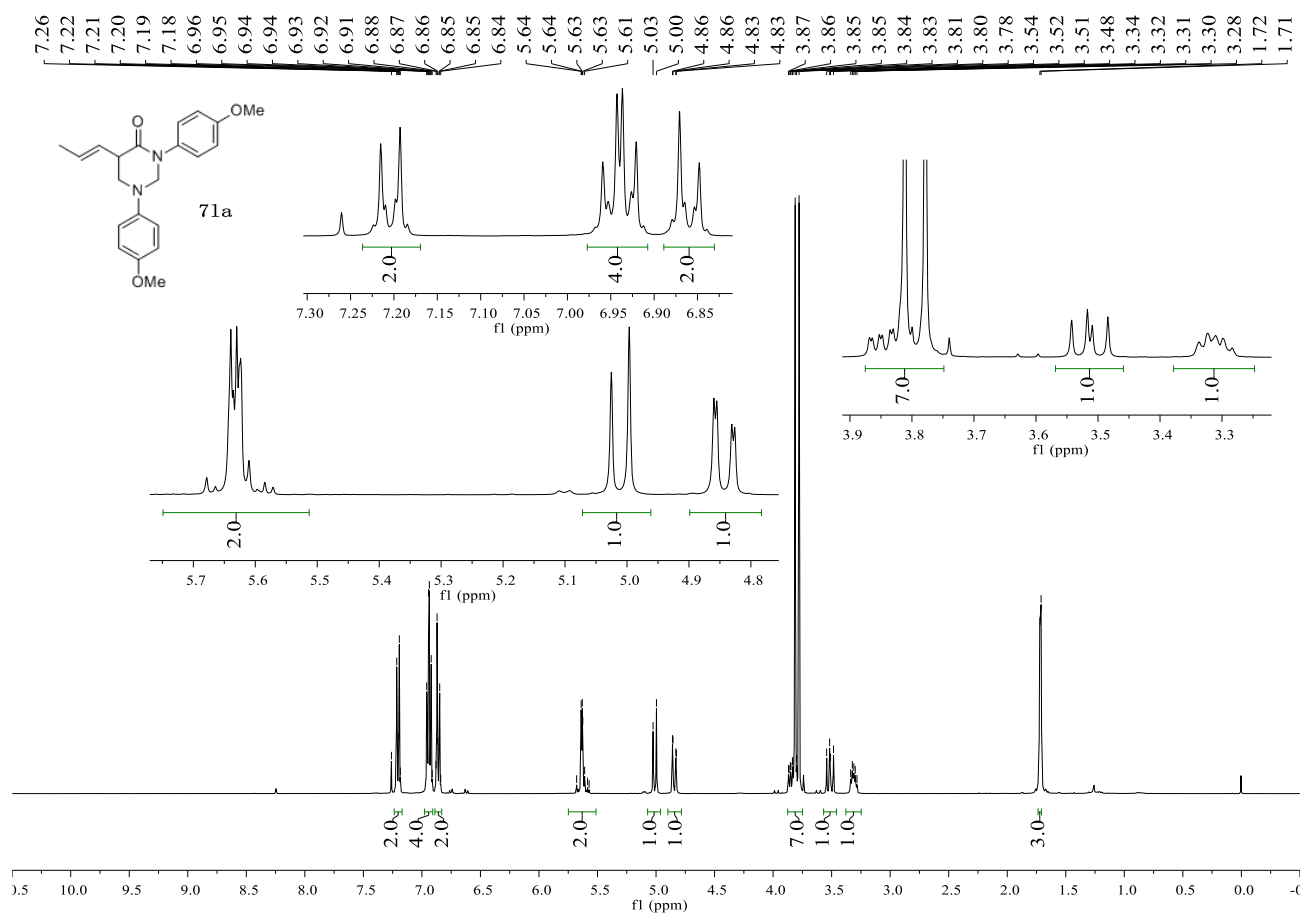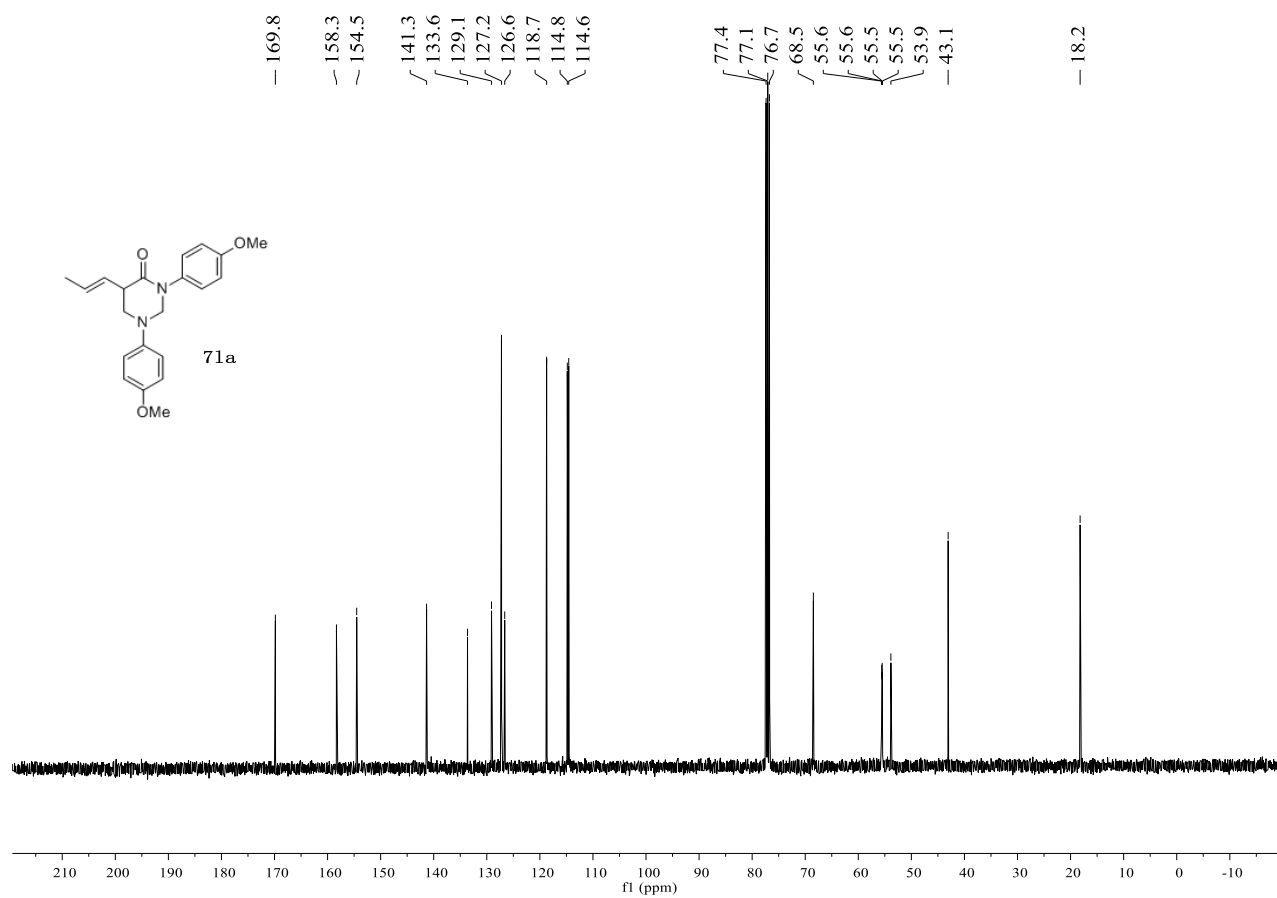

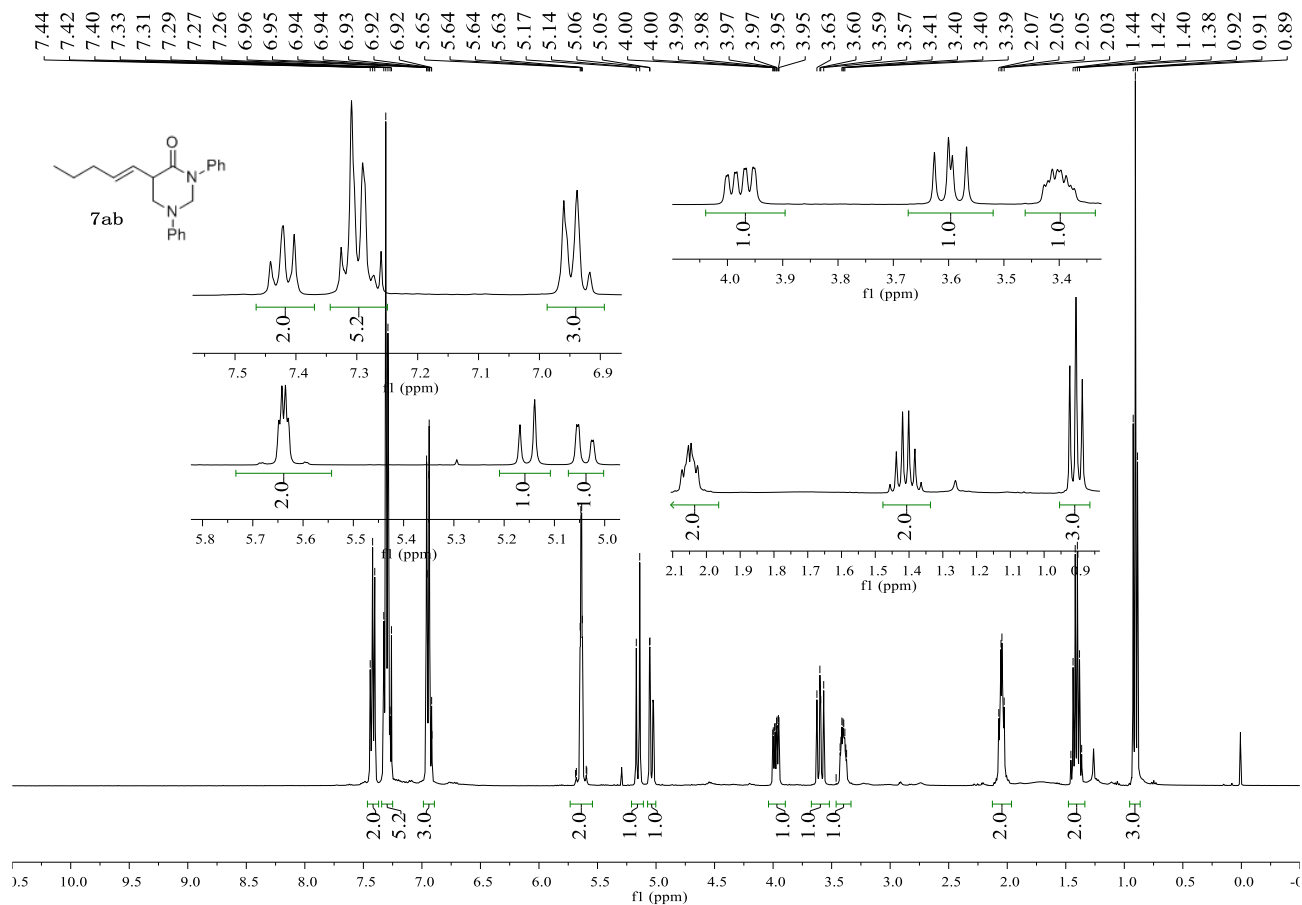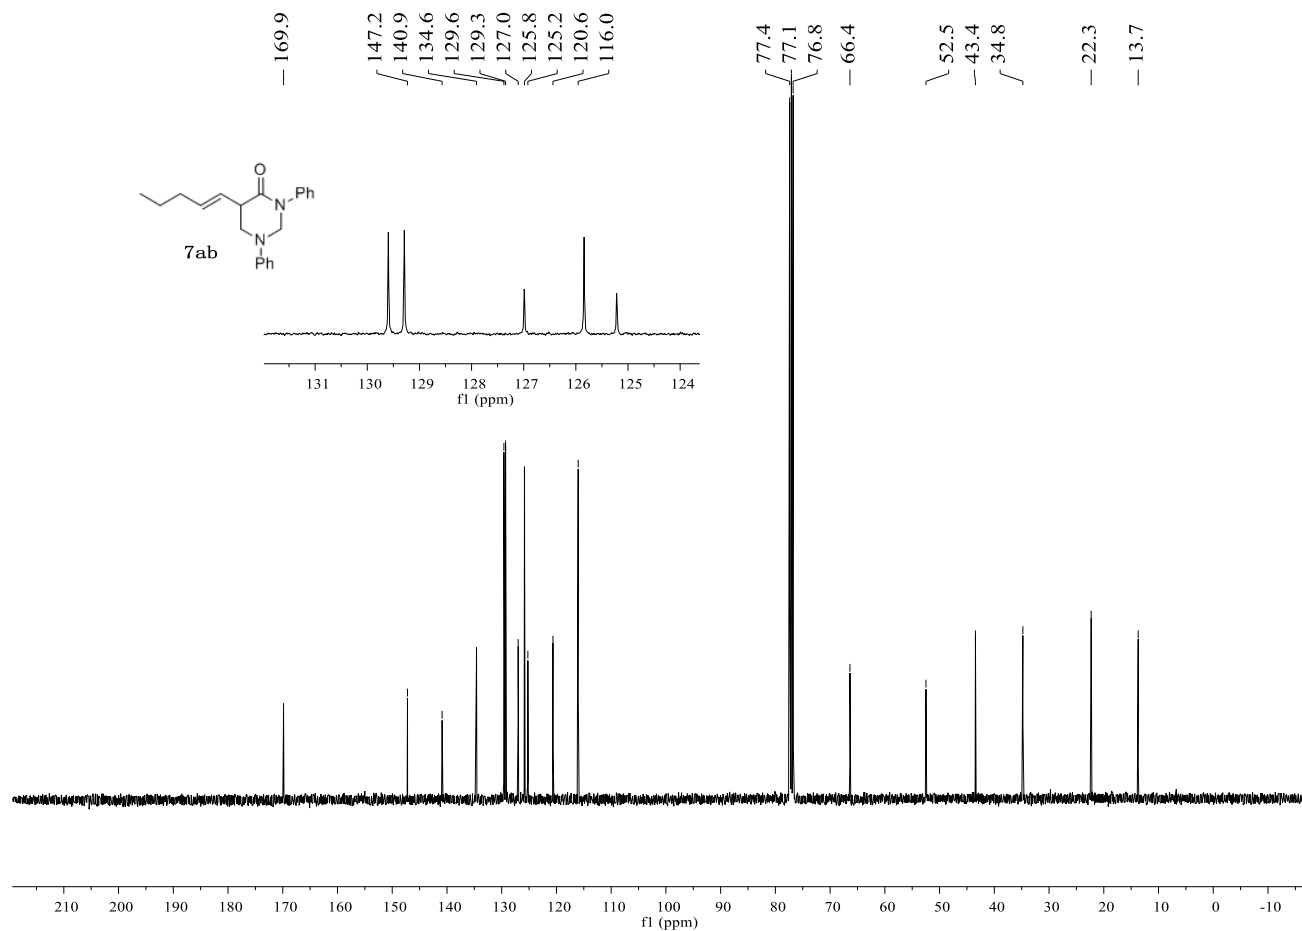



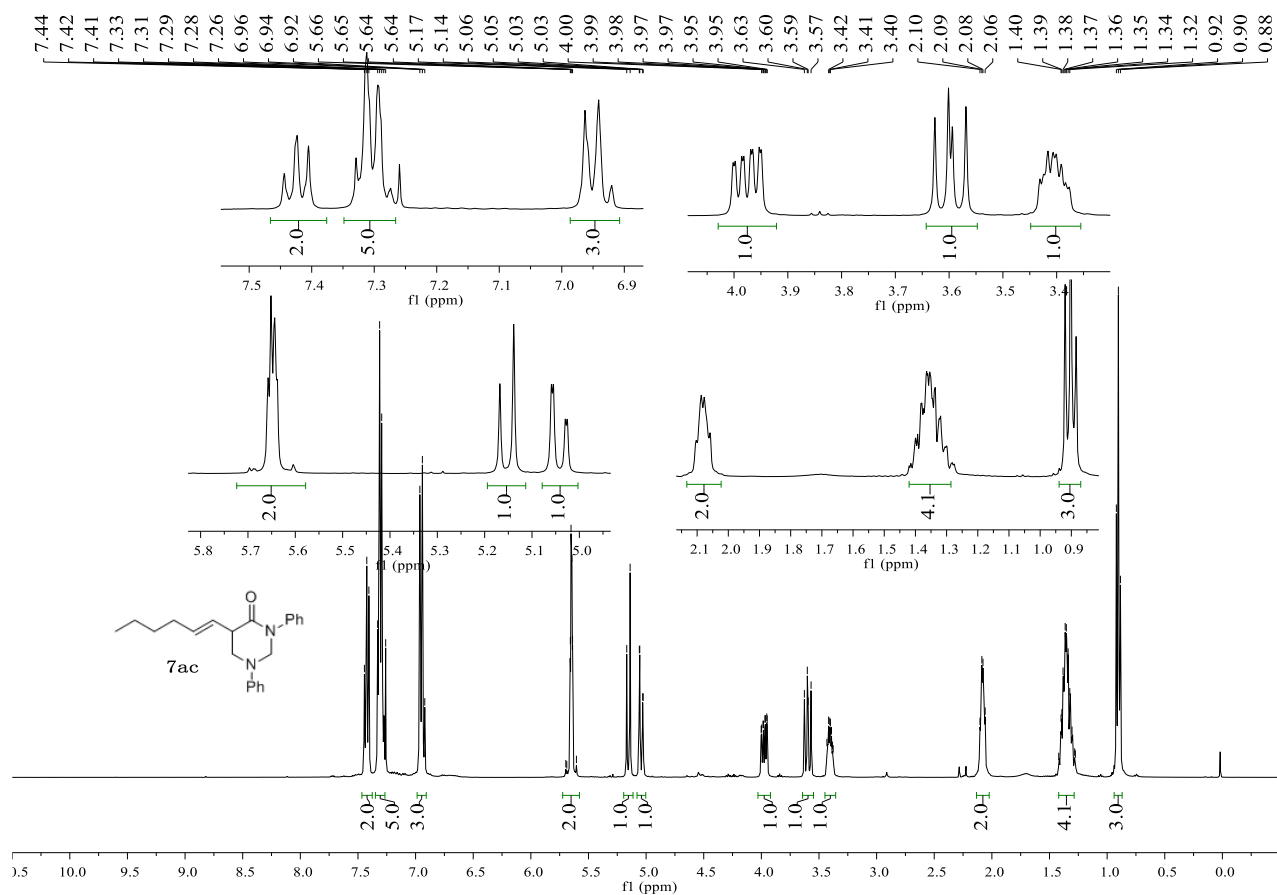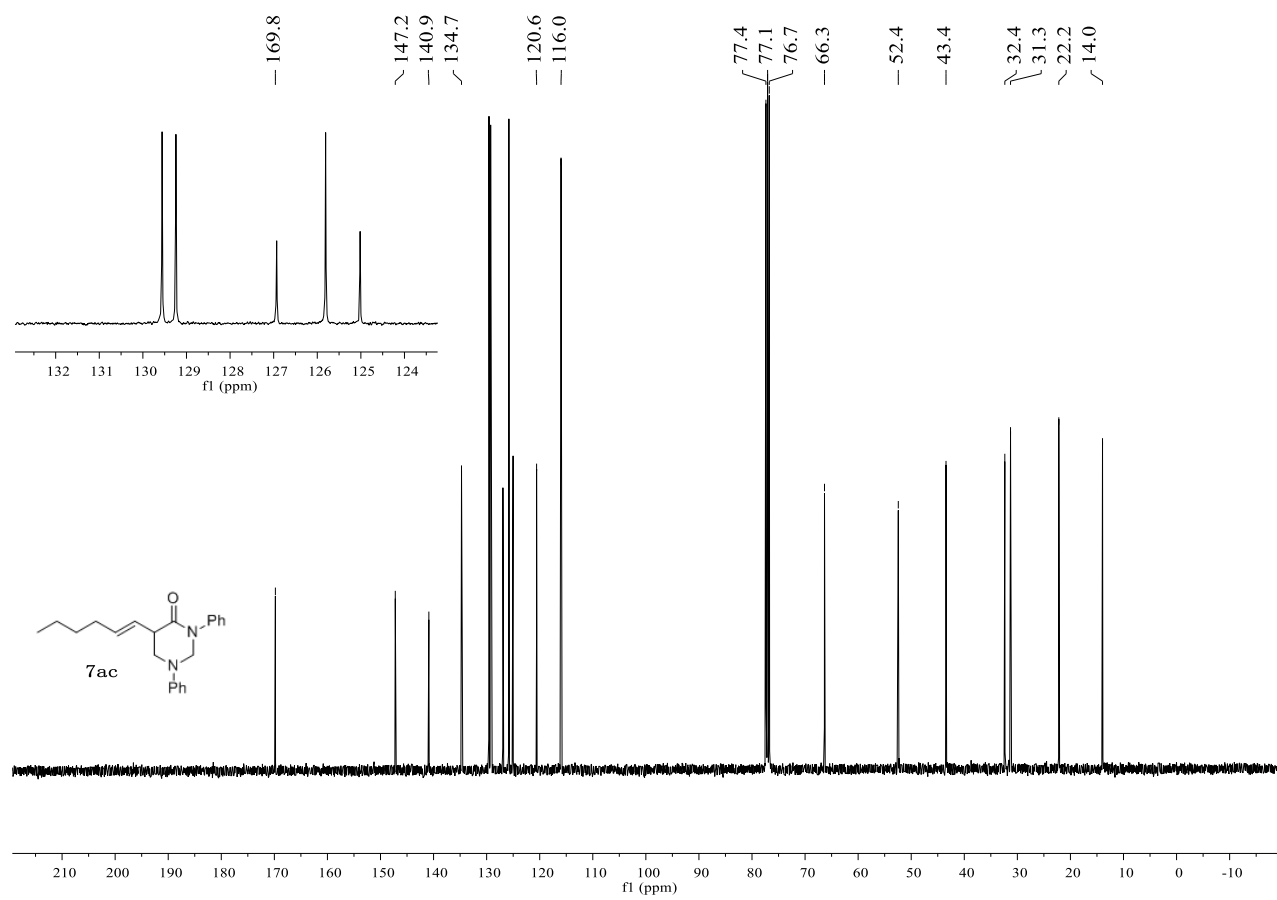

7.86 7.86 7.85 7.84 7.55 7.54 7.53 7.53 7.52 7.51 7.51 7.44 7.44 7.43 7.42 7.41 7.40 7.22 7.21 7.21 7.20 7.20 7.18 7.18 7.17 7.16 7.16 7.15 7.14 7.14 6.76 6.74 6.72 6.70 4.90 3.82 3.67 3.33 3.29 3.24 3.21

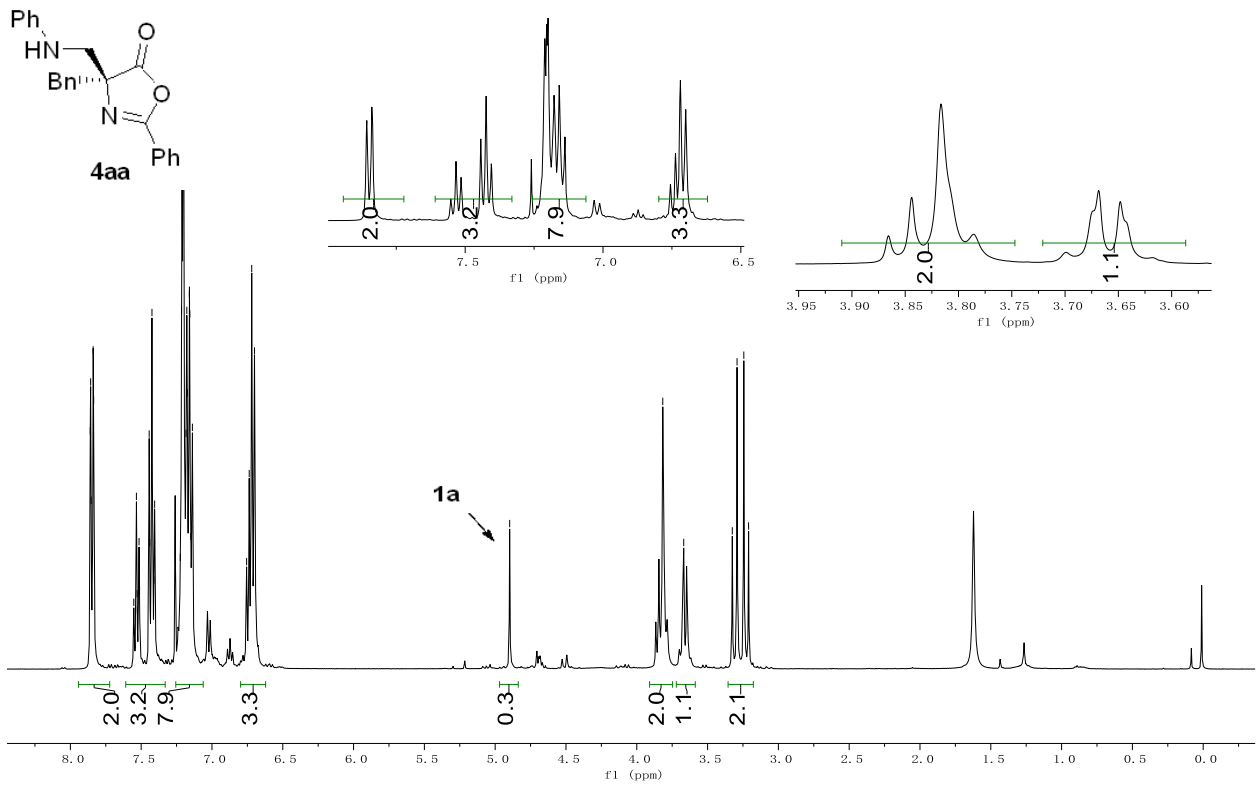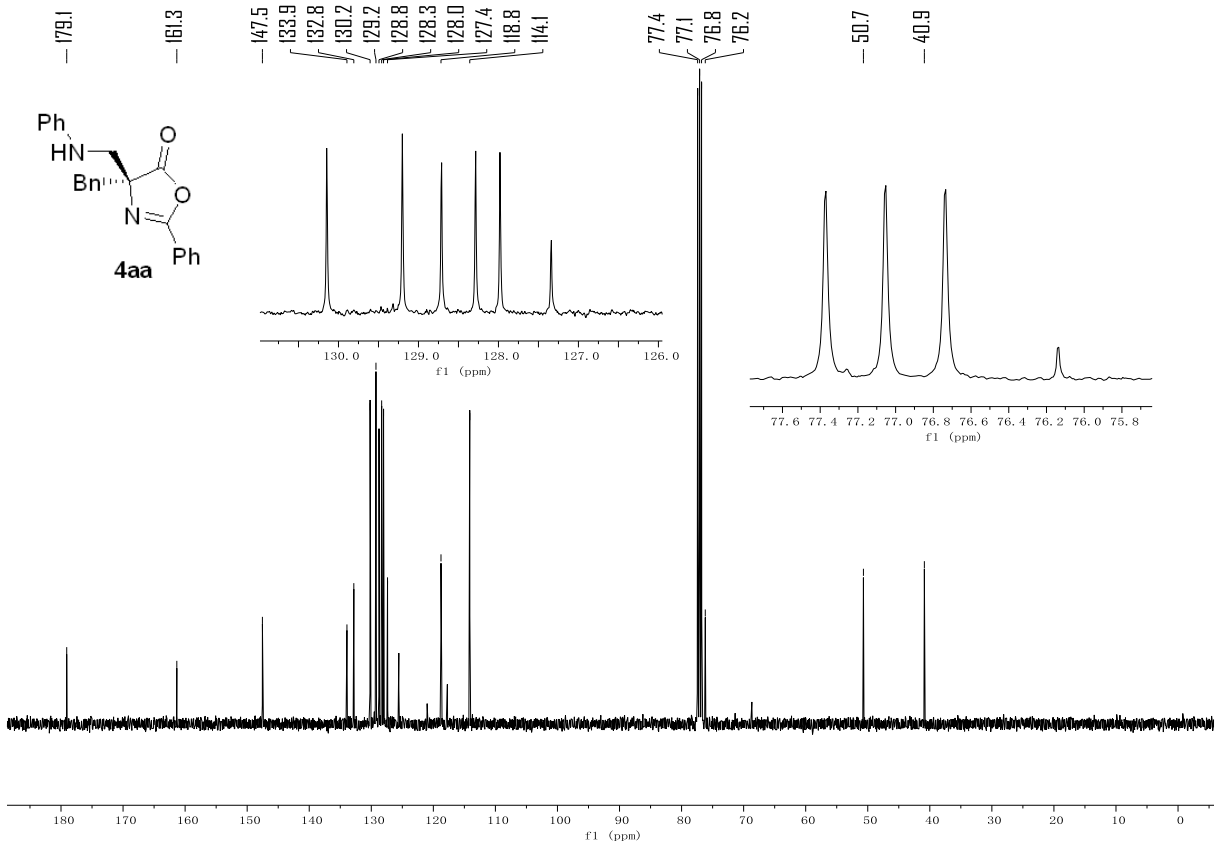



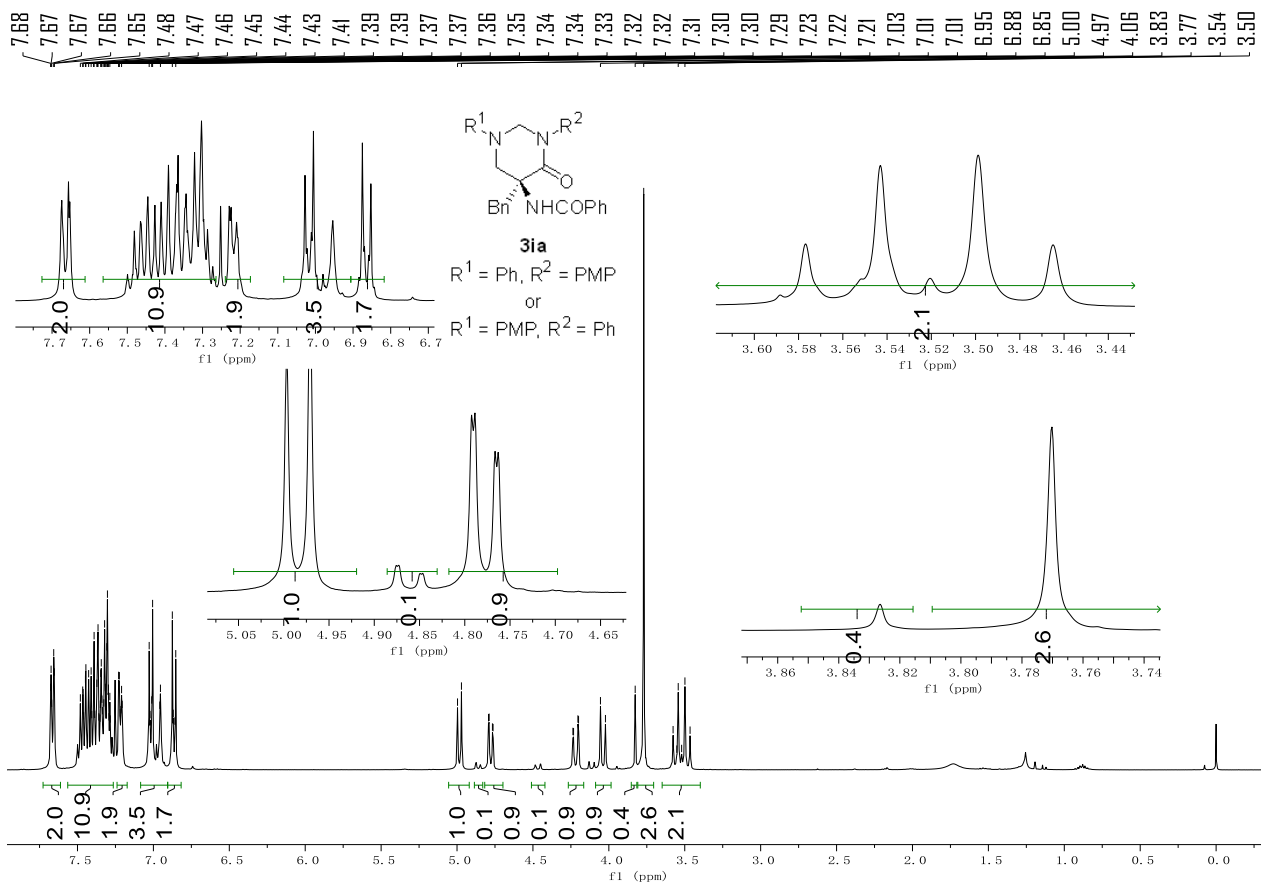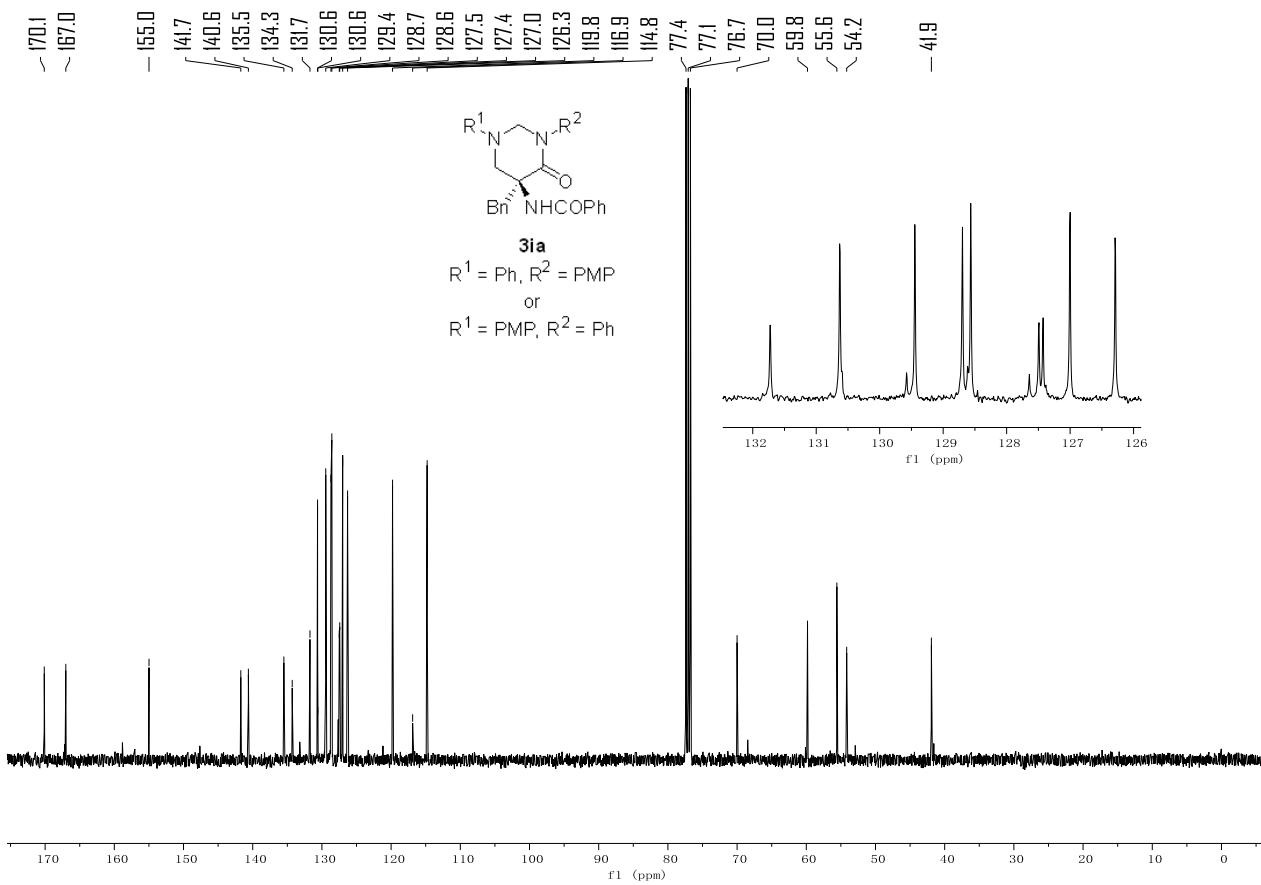

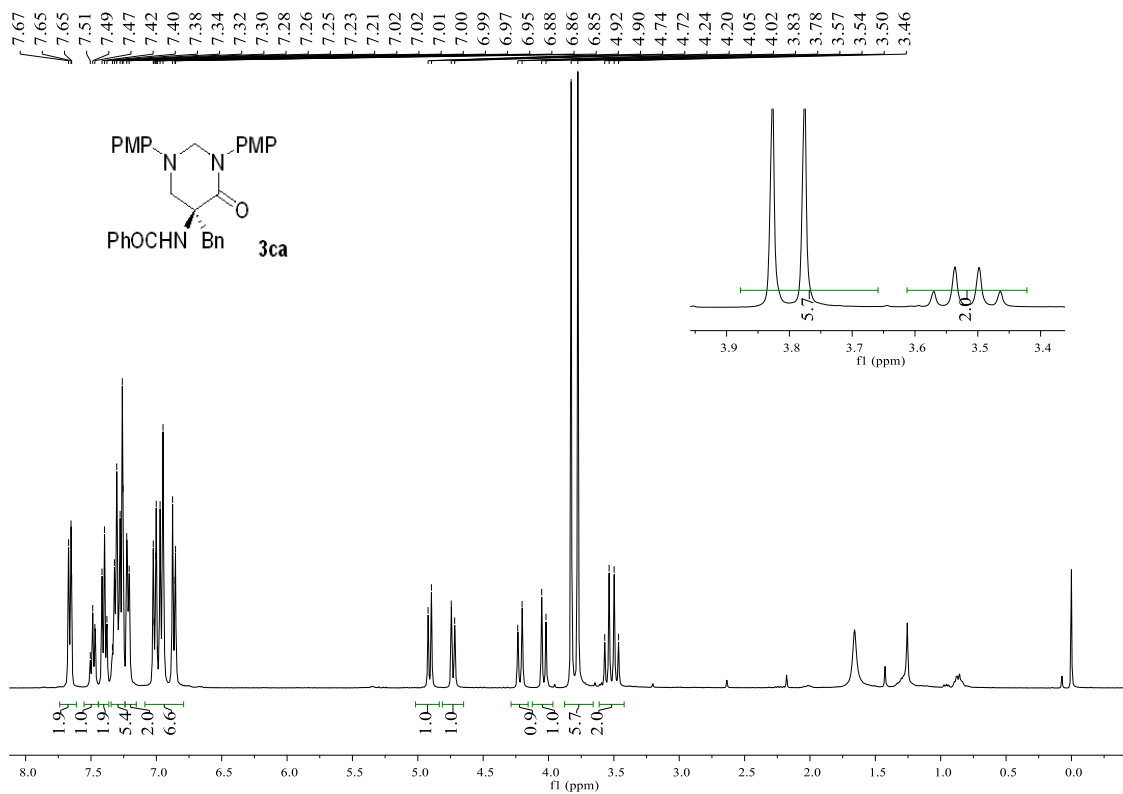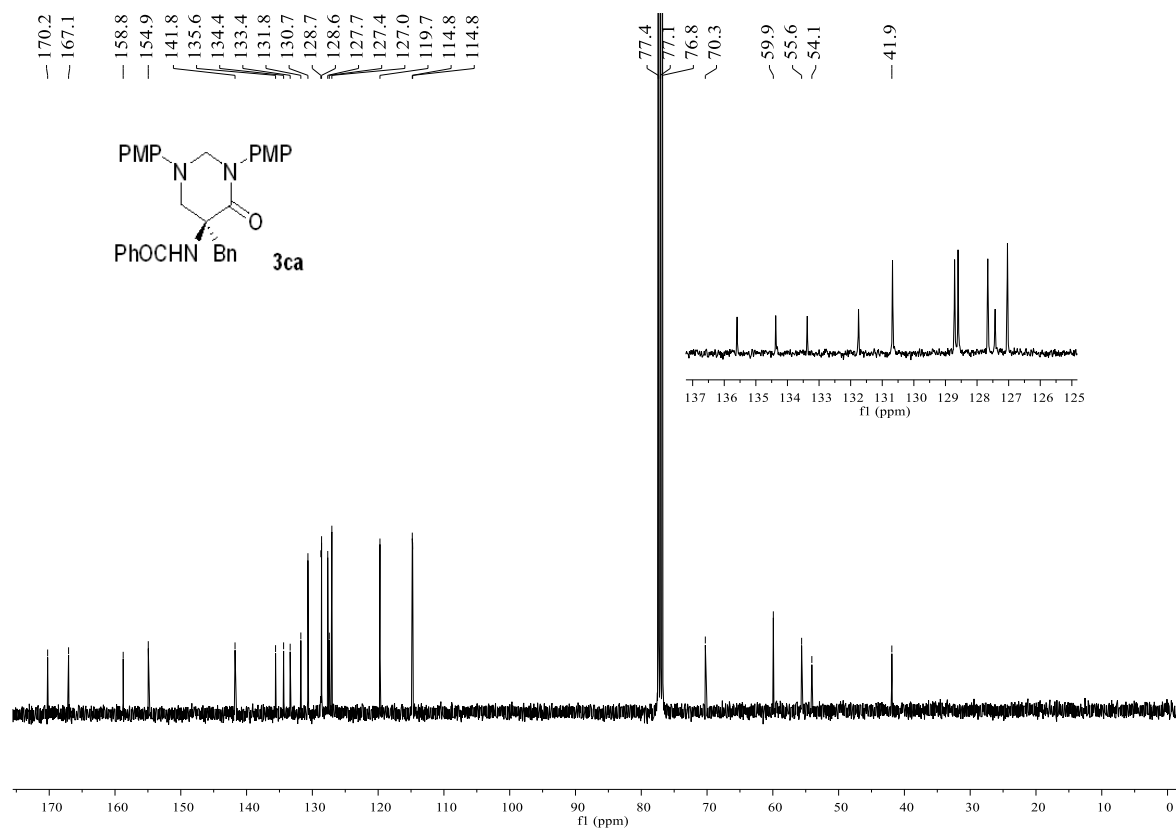

Supplement: d1cc06549a1.pdf [file d1cc06549a1.pdf]
